# Supplementary material for: Neurocalcin regulates nighttime sleep and arousal in Drosophila
Source: eLife. 2019 Mar 13;8:e38114. doi: 10.7554/eLife.38114 (PMC6415939; doi:10.7554/eLife.38114)
Supplement: Supplementary file 1. [file elife-38114-supp1.xlsx]

## Sheet: readme
1	Open the monitor.txt files from DAM output, make sure the sampling interval is 1 min
2	Select the 24 hour period you want to analyse for all 32 channels plus light chanel (33 channels in total)
3	Paste this 33 x 1440 data matrix in to "monitor input" tab to replace the legacy data the pink cells; don’t change anything else in this tab except for genotypes, otherwise the calculation wont work
4	All the conventonal sleep parameters will be calculated instantly at "parameter calculator" tab
5	Conventional sleep profile time series will be generated in "sleep min per 30 mins " tab
6	Conventional locomotor profile time series will be generated in "beam breaks per 30 mins " tab
*	There are many hidden cells in each tab that are hidden, it was used for calculation, but please don’t change them
*	The calculation is designed for single day with 12 hours light-on and 12 hours light-off, if you are interested in different light-dark cycle or focus on certain phase of the day, please contact me on kc280@leicester.ac.uk, I will show you how to change the calculation
*	You will notice recording from dead flies show 1440 total sleep and 0 bean breaks, you need to remove these flies when you interpret data
*	The downstream statistic and plotting can be down in either GraphPad prism or R

## Sheet: monitor input
		genotypeA	genotypeA	genotypeA	genotypeA	genotypeA	genotypeA	genotypeA	genotypeA	genotypeA	genotypeA	genotypeA	genotypeA	genotypeA	genotypeA	genotypeA	genotypeA	genotypeB	genotypeB	genotypeB	genotypeB	genotypeB	genotypeB	genotypeB	genotypeB	genotypeB	genotypeB	genotypeB	genotypeB	genotypeB	genotypeB	genotypeB	genotypeB
time (min)	light	ch1	ch2	ch3	ch4	ch5	ch6	ch7	ch8	ch9	ch10	ch11	ch12	ch13	ch14	ch15	ch16	ch17	ch18	ch19	ch20	ch21	ch22	ch23	ch24	ch25	ch26	ch27	ch28	ch29	ch30	ch31	ch32
1	1	18	0	3	0	3	0	0	1	4	3	4	2	3	3	1	1	3	0	4	1	0	3	2	2	0	3	0	5	1	4	3	1
2	1	3	0	0	1	2	0	4	2	3	2	3	4	4	2	1	4	5	7	7	7	1	5	4	2	0	3	4	6	9	4	5	0
3	1	0	1	0	2	5	4	3	5	4	4	5	2	5	3	1	2	3	6	6	6	5	3	6	4	2	1	3	7	8	8	4	4
4	1	0	1	0	3	3	5	3	3	14	6	3	4	5	2	0	6	5	9	7	4	5	6	9	7	5	2	5	9	2	6	2	2
5	1	0	0	0	1	6	5	11	2	3	4	5	3	4	2	3	4	6	3	6	5	5	5	7	4	5	4	3	7	8	6	5	4
6	1	0	0	2	3	4	4	4	4	11	4	4	2	7	2	2	6	6	2	6	7	4	5	7	4	4	4	3	5	4	4	4	3
7	1	6	0	2	3	6	4	3	3	5	4	3	3	5	1	1	2	2	1	5	5	5	6	3	3	5	4	4	5	3	5	3	3
8	1	0	1	0	3	5	6	3	2	4	2	2	1	2	3	2	6	4	4	5	3	5	6	6	5	4	3	1	3	6	6	0	2
9	1	2	3	0	4	5	2	3	6	1	0	3	5	8	3	2	4	2	3	6	5	4	2	4	3	4	1	3	4	3	5	2	2
10	1	0	5	0	7	2	2	3	1	5	2	3	3	3	3	2	4	4	4	5	5	5	3	3	3	4	2	0	7	3	5	3	4
11	1	0	0	2	3	5	5	0	2	2	2	1	1	5	3	0	4	3	1	4	5	3	5	6	5	3	2	0	6	3	7	4	2
12	1	0	0	0	3	5	3	2	4	3	1	1	4	3	3	0	3	2	4	2	2	4	11	4	4	4	3	1	3	3	3	3	5
13	1	0	1	0	2	2	3	2	1	5	4	3	4	4	2	3	4	5	4	4	2	4	1	6	2	5	2	0	0	2	3	2	4
14	1	1	1	0	1	3	5	2	3	5	3	4	3	5	2	2	3	2	3	2	4	3	5	4	5	4	2	4	5	1	3	3	2
15	1	0	0	0	0	4	6	2	2	4	4	3	2	4	1	0	4	0	1	2	4	6	4	4	3	4	4	4	5	1	4	4	1
16	1	9	0	5	1	3	3	4	2	5	4	4	5	3	2	3	2	2	2	4	3	4	2	3	2	3	4	3	3	3	5	2	4
17	1	1	0	2	1	5	4	4	2	4	3	2	2	5	2	1	4	3	2	6	5	4	5	3	3	4	2	2	5	6	3	2	3
18	1	0	2	4	1	5	5	8	2	2	4	2	3	5	3	3	4	2	4	4	4	4	4	4	4	5	1	4	5	2	7	1	6
19	1	1	1	5	2	2	4	4	1	5	4	5	2	4	3	2	5	3	4	4	2	5	4	6	4	5	2	3	4	4	3	1	4
20	1	2	8	3	4	4	4	2	3	2	3	3	2	4	2	3	4	4	2	4	5	5	2	5	2	5	1	3	4	6	5	2	2
21	1	1	9	2	5	8	4	3	2	4	8	5	2	5	2	3	3	6	1	2	13	4	4	4	4	3	1	2	5	2	4	4	3
22	1	17	5	4	3	6	4	3	2	4	4	5	3	5	2	3	2	4	3	4	5	4	2	0	4	3	2	1	11	4	4	3	2
23	1	5	3	4	4	4	3	2	2	5	3	4	2	3	2	2	3	5	2	3	3	5	5	4	4	4	3	1	3	3	5	2	4
24	1	2	2	12	1	3	5	4	3	3	4	2	2	4	0	2	3	2	4	5	2	3	2	7	2	3	2	3	5	2	4	2	2
25	1	2	1	27	4	3	6	2	3	1	3	2	1	2	0	2	2	2	2	3	4	3	5	3	1	4	3	1	4	4	5	1	4
26	1	7	0	30	3	3	5	2	2	2	2	1	2	4	0	0	4	2	3	3	3	5	4	4	1	4	3	4	3	4	4	1	5
27	1	2	0	17	2	2	2	2	6	4	0	3	2	5	2	2	2	3	2	2	4	4	5	2	2	1	1	2	2	5	4	1	2
28	1	1	0	4	2	2	3	2	3	5	6	0	2	3	0	0	3	2	5	3	3	4	2	2	0	3	1	5	4	4	3	2	2
29	1	1	0	5	4	16	9	1	1	3	2	2	2	2	2	0	2	5	4	5	0	4	3	5	2	2	3	3	2	3	3	5	2
30	1	1	0	0	3	9	3	3	2	2	2	1	2	4	1	1	2	1	1	1	2	3	5	1	2	4	3	2	2	3	4	2	2
31	1	0	1	2	5	2	6	3	1	4	3	3	3	2	1	4	2	2	1	3	8	3	1	9	2	5	5	3	2	3	2	3	1
32	1	5	1	1	5	5	4	2	3	4	1	3	3	2	0	2	3	6	2	3	3	3	4	6	2	3	3	0	4	2	4	4	2
33	1	1	1	4	3	3	4	5	7	3	4	3	2	6	0	3	4	4	1	4	3	4	5	6	7	2	3	0	3	2	4	3	4
34	1	1	3	2	5	3	3	3	2	4	3	2	4	4	0	4	5	2	2	5	4	4	5	6	4	4	3	2	5	2	6	3	3
35	1	2	4	3	4	4	5	2	1	4	2	7	2	4	0	2	4	6	3	3	3	4	4	6	2	4	2	2	3	4	4	3	10
36	1	0	1	2	1	3	2	3	5	2	4	2	1	2	2	0	2	4	4	4	4	5	7	5	4	4	3	1	4	3	3	3	3
37	1	0	23	0	6	3	4	3	1	4	1	2	3	3	5	3	3	3	1	3	2	4	6	2	3	5	2	3	4	2	5	5	3
38	1	3	9	4	2	3	4	5	2	4	4	2	3	20	1	2	5	4	4	3	3	4	5	5	3	5	3	3	2	3	5	2	3
39	1	3	1	3	4	3	3	4	2	3	1	3	2	30	1	2	5	2	2	2	3	4	3	5	1	3	2	0	3	2	3	0	3
40	1	1	1	3	5	2	4	2	5	3	2	3	2	3	0	2	3	2	5	4	4	10	5	4	5	4	2	3	3	4	4	3	3
41	1	0	3	3	4	3	5	3	2	2	4	5	0	3	0	2	3	3	2	3	2	4	3	5	3	2	1	3	3	2	1	3	3
42	1	1	1	0	5	2	6	1	2	0	0	2	0	5	0	2	2	0	1	1	2	4	1	3	2	4	2	5	3	3	3	2	3
43	1	3	0	1	4	2	4	2	2	0	0	4	0	4	0	2	3	3	2	2	1	4	4	3	0	3	2	3	3	5	4	2	2
44	1	0	0	0	4	2	2	1	5	0	0	2	1	2	0	1	4	6	1	3	3	4	2	2	2	2	1	1	1	6	9	1	0
45	1	2	0	0	0	3	4	1	0	3	0	2	2	2	0	1	2	2	4	4	2	4	6	2	1	3	1	2	3	7	4	9	2
46	1	0	0	3	0	1	4	3	2	4	0	1	3	3	0	0	2	1	0	2	4	5	2	2	1	5	1	2	18	2	3	0	3
47	1	1	2	6	5	4	6	4	4	6	3	2	1	2	1	1	2	3	4	2	5	4	9	7	2	3	2	0	3	2	3	1	8
48	1	2	2	2	5	5	5	2	3	4	2	4	3	2	2	3	2	5	1	3	4	4	6	5	2	6	1	3	4	2	4	2	3
49	1	2	8	4	4	3	5	3	2	3	2	4	2	4	0	2	4	4	2	4	7	4	4	4	1	5	15	3	3	2	4	3	2
50	1	2	3	2	4	9	4	3	3	3	2	4	3	4	3	2	2	2	2	2	4	5	3	3	3	2	4	3	6	2	2	4	7
51	1	1	2	2	4	4	5	3	2	3	2	3	2	2	1	2	2	3	4	7	4	4	5	3	2	6	3	3	2	4	4	11	3
52	1	1	18	0	5	3	5	5	2	3	3	5	4	5	0	0	2	3	2	2	4	4	3	5	4	3	1	0	3	4	3	8	2
53	1	1	16	2	2	3	3	2	2	12	4	2	3	4	0	1	3	2	3	2	3	6	3	2	2	3	3	3	3	3	4	4	2
54	1	2	2	2	0	2	6	2	0	2	3	2	3	4	0	0	3	3	1	3	3	4	4	4	2	3	3	1	4	1	7	2	3
55	1	2	5	4	0	2	5	1	1	3	0	4	3	0	1	0	3	3	2	4	3	4	4	4	3	4	2	2	2	6	6	3	2
56	1	1	3	0	0	3	2	1	1	0	0	3	1	0	1	2	3	2	2	3	3	4	4	5	3	5	2	2	4	3	4	2	1
57	1	2	1	5	0	3	5	5	1	0	0	2	0	4	2	2	3	3	3	2	3	5	5	3	0	3	3	3	5	2	3	4	7
58	1	1	2	0	0	3	3	0	1	0	0	2	0	4	0	3	2	1	1	2	4	5	4	0	2	3	2	2	4	1	3	3	3
59	1	4	0	2	0	3	4	0	0	0	0	2	0	5	0	0	2	1	1	2	3	3	7	8	0	1	2	2	2	1	3	0	3
60	1	1	1	0	0	2	3	0	1	0	0	2	3	3	0	0	1	2	2	3	4	4	4	3	2	4	2	0	3	2	5	2	2
61	1	1	1	0	0	0	1	0	2	0	0	2	1	4	0	0	2	4	0	13	2	5	4	1	5	1	0	2	3	3	2	0	1
62	1	0	3	4	0	0	2	0	11	0	0	0	2	5	0	2	2	2	4	14	1	4	6	2	2	2	2	3	5	1	2	4	2
63	1	4	0	3	0	0	9	0	0	0	0	3	2	2	0	2	2	2	2	3	2	2	6	6	2	5	2	8	3	2	3	3	3
64	1	1	1	8	0	2	2	0	0	0	0	3	2	2	0	4	1	6	3	3	4	5	3	4	0	3	1	7	2	1	5	1	2
65	1	1	1	4	0	4	6	0	2	0	0	5	1	1	1	2	1	3	2	4	3	4	4	3	2	2	3	3	4	2	1	4	1
66	1	0	2	2	0	2	3	0	0	0	0	2	3	47	4	3	2	3	1	3	3	5	7	6	1	3	4	3	4	2	4	2	2
67	1	2	2	1	0	3	4	0	7	0	0	1	0	5	2	1	1	4	1	3	4	4	2	6	4	3	4	3	4	2	3	2	3
68	1	0	1	1	0	2	4	0	6	0	0	3	1	5	0	2	3	4	5	4	2	4	3	2	7	1	3	1	2	5	6	3	2
69	1	2	5	0	0	2	3	0	2	3	1	1	2	2	2	1	1	23	2	7	4	4	12	6	4	4	3	2	3	3	4	2	1
70	1	1	18	2	0	2	5	0	1	2	0	3	3	3	0	1	1	4	5	5	4	5	3	4	2	3	3	3	3	3	3	1	4
71	1	3	15	3	0	3	4	0	2	2	0	2	2	4	0	2	3	3	1	3	2	4	4	5	2	3	2	1	3	2	4	1	3
72	1	0	14	2	0	2	4	2	1	3	0	2	0	5	0	2	3	3	3	2	1	5	7	4	2	2	3	3	3	22	4	2	3
73	1	2	1	0	0	0	6	3	3	0	0	4	0	3	0	0	1	3	1	2	2	4	3	5	2	4	1	2	2	1	3	2	0
74	1	3	0	0	0	0	4	3	2	0	0	2	0	4	0	0	0	0	1	3	3	4	2	3	2	3	1	3	3	3	3	1	3
75	1	3	0	0	0	0	2	5	7	0	0	4	0	3	0	2	2	2	1	2	2	4	3	3	1	3	1	1	3	5	6	1	2
76	1	1	2	1	0	1	1	1	1	0	0	2	0	3	0	2	2	3	1	4	2	4	4	2	1	2	1	2	3	1	2	3	2
77	1	0	0	2	0	1	7	1	1	0	0	1	0	0	0	0	1	2	1	2	2	2	2	2	0	3	4	2	5	1	3	1	1
78	1	1	1	1	0	1	0	1	2	0	0	1	0	2	0	2	3	3	0	2	2	3	3	2	0	6	3	3	4	2	3	2	3
79	1	0	0	2	0	2	4	2	0	0	0	4	0	1	0	3	4	0	4	2	2	4	4	3	2	3	1	1	2	2	2	3	2
80	1	1	1	0	0	1	3	1	1	0	0	5	1	2	0	3	0	2	2	2	4	3	4	2	3	5	2	1	3	2	3	1	1
81	1	1	2	2	0	0	4	0	2	2	0	3	1	5	0	2	0	1	3	4	3	4	4	5	2	8	2	2	4	2	4	3	2
82	1	6	1	1	0	3	1	0	2	3	0	3	1	3	0	2	0	2	5	3	3	4	6	5	1	2	2	3	3	2	4	2	3
83	1	3	0	0	0	2	3	0	1	3	0	2	1	4	0	2	0	3	2	4	4	4	3	3	5	5	1	2	3	1	3	1	2
84	1	1	0	0	0	3	4	0	2	4	0	2	0	3	0	2	1	0	3	3	4	3	3	5	2	4	13	2	3	2	4	1	2
85	1	1	1	0	2	2	4	0	2	6	0	3	0	2	0	3	4	2	1	3	4	5	3	4	2	2	2	2	4	3	2	4	2
86	1	2	4	1	0	3	3	3	2	4	0	0	2	3	0	2	1	3	1	2	3	5	2	5	3	3	2	2	5	4	2	1	2
87	1	0	1	4	0	0	2	3	4	0	0	2	0	3	0	1	0	4	0	2	2	4	3	3	2	3	1	1	3	0	6	3	4
88	1	0	5	2	3	0	1	4	2	2	0	5	0	0	2	2	0	2	1	3	2	4	4	4	1	2	3	3	2	2	4	3	2
89	1	0	3	2	3	0	6	2	1	3	0	2	0	0	0	1	0	1	3	3	2	4	5	7	2	1	1	2	2	1	4	1	0
90	1	1	1	0	3	0	2	0	1	24	0	1	0	0	1	2	0	3	1	3	3	4	3	2	2	3	1	0	4	1	3	2	0
91	1	2	2	3	3	0	0	3	2	2	0	2	0	0	0	3	0	3	1	3	3	3	2	2	2	4	1	3	1	2	3	1	4
92	1	1	5	0	5	0	0	0	2	1	0	2	0	2	0	0	0	2	1	3	1	5	4	2	1	3	4	6	4	2	3	0	5
93	1	1	3	3	3	0	5	1	2	1	0	1	0	2	0	2	0	1	2	2	2	2	3	2	3	3	1	1	7	4	3	2	4
94	1	0	0	2	3	0	11	0	2	2	0	0	0	3	0	2	0	3	2	2	2	4	1	2	1	4	1	0	2	2	4	2	2
95	1	4	0	3	3	0	2	0	0	22	0	2	0	2	0	3	0	3	1	2	4	5	3	4	2	4	1	2	3	0	2	0	3
96	1	2	0	2	2	0	6	0	2	0	0	4	3	3	0	3	0	5	3	3	2	4	3	3	3	4	3	6	3	4	3	3	3
97	1	1	1	3	6	0	6	0	2	0	0	2	3	4	0	0	0	1	0	5	5	3	6	4	3	3	1	3	4	2	2	5	3
98	1	2	1	3	4	0	2	0	4	0	0	3	3	3	0	1	0	1	3	3	2	4	3	3	2	4	3	3	3	1	4	3	4
99	1	1	3	0	4	1	3	0	1	0	0	3	1	5	0	1	0	1	4	3	4	5	4	2	3	4	0	2	0	4	3	5	2
100	1	2	0	0	0	0	2	0	1	0	0	2	2	9	0	0	0	2	4	3	3	4	3	6	3	25	3	4	6	1	3	2	1
101	1	2	0	0	4	3	0	0	1	0	0	2	2	5	0	0	0	3	1	4	2	8	3	4	2	3	1	2	0	1	2	2	3
102	1	1	0	3	3	4	0	0	3	0	0	1	0	3	0	0	0	4	2	2	3	4	4	4	4	3	2	3	3	7	1	2	2
103	1	3	2	3	3	0	0	0	2	0	0	2	0	3	0	1	2	3	2	3	2	5	4	3	2	0	1	2	5	2	2	1	2
104	1	1	1	4	3	0	0	0	1	0	0	2	0	1	0	2	4	3	1	4	3	6	4	2	2	4	2	2	3	1	3	1	3
105	1	0	3	2	0	0	0	0	3	0	0	0	0	1	0	2	3	2	2	3	1	4	3	3	2	3	0	2	4	2	5	2	1
106	1	0	2	2	0	0	0	0	3	0	0	3	0	4	2	3	1	1	3	2	4	3	3	1	1	3	2	1	3	2	4	2	1
107	1	1	1	3	0	0	0	0	2	0	0	2	0	1	1	1	1	2	1	2	4	4	1	3	1	0	1	1	3	2	2	3	1
108	1	1	1	0	0	0	0	0	2	1	0	1	0	0	3	3	2	2	1	0	3	3	5	2	2	3	2	1	3	1	2	0	1
109	1	5	1	0	0	0	0	0	1	0	0	1	0	4	1	1	0	2	2	2	4	2	2	2	0	3	4	4	5	5	3	0	2
110	1	1	1	0	0	0	0	0	3	0	0	2	0	2	0	2	2	1	1	1	3	5	2	5	2	4	3	4	2	0	4	1	0
111	1	0	1	0	0	0	0	3	0	0	0	4	0	3	0	2	2	0	0	4	3	3	2	4	2	4	1	2	6	2	5	3	2
112	1	2	0	0	0	0	0	4	2	0	0	3	0	2	0	1	3	2	5	2	2	3	3	3	3	3	3	0	3	2	6	1	2
113	1	3	0	3	0	1	0	2	2	0	0	1	0	2	0	1	0	4	3	2	3	5	5	9	2	2	1	2	9	1	5	3	3
114	1	1	0	4	0	44	0	0	5	0	0	2	0	5	0	2	0	3	3	2	1	4	3	3	3	2	3	2	2	1	2	2	0
115	1	2	0	3	3	3	0	3	2	0	0	3	0	4	0	1	0	7	1	4	2	4	3	3	2	7	1	1	5	0	4	3	0
116	1	1	1	2	1	0	0	0	2	1	0	0	3	3	0	3	0	1	3	3	4	4	2	4	2	4	2	2	2	1	3	3	2
117	1	3	5	2	0	0	0	0	3	4	0	0	1	0	0	2	0	0	3	3	2	4	4	2	1	3	2	4	5	2	3	3	1
118	1	2	5	4	0	0	0	0	3	3	0	2	0	5	0	1	0	3	1	5	3	3	4	4	2	4	4	2	3	3	3	3	2
119	1	2	9	5	0	0	0	0	2	0	0	2	0	3	0	2	0	3	0	1	1	5	2	4	3	2	0	1	2	1	4	2	3
120	1	2	1	10	0	0	0	0	4	0	0	3	0	4	0	1	0	3	3	2	3	3	2	3	2	5	2	2	2	2	2	3	3
121	1	1	0	4	0	0	0	0	2	2	0	2	0	5	0	0	0	4	2	4	4	4	3	1	2	3	0	2	0	0	1	2	4
122	1	0	1	6	0	0	0	0	3	0	0	2	0	4	0	0	0	2	2	4	7	3	4	2	2	4	0	2	3	1	4	1	2
123	1	0	0	5	0	0	0	0	2	1	0	2	0	3	0	0	0	4	4	2	1	4	5	3	2	2	0	2	3	2	3	1	1
124	1	2	7	5	0	0	0	0	1	0	0	0	0	0	0	2	0	0	3	2	0	4	2	3	0	2	0	0	1	5	2	1	1
125	1	0	1	2	0	1	0	0	0	1	0	2	0	3	0	1	0	2	1	2	2	4	4	3	0	3	0	1	5	2	2	1	2
126	1	3	8	2	0	2	0	0	6	0	0	1	0	2	0	2	0	2	2	4	1	3	3	2	0	2	1	2	3	1	3	3	2
127	1	1	1	3	0	0	0	0	0	1	0	2	0	2	0	1	0	5	5	2	3	2	2	3	3	4	2	0	3	2	2	1	0
128	1	3	0	1	0	0	0	0	2	0	0	2	0	3	0	2	0	2	0	3	2	5	4	5	1	2	0	3	4	2	2	1	5
129	1	2	1	1	0	0	0	2	0	2	0	4	0	1	0	2	0	1	2	4	2	4	2	3	2	4	2	1	3	1	3	2	3
130	1	2	2	0	0	0	0	4	3	0	0	4	0	0	0	0	0	0	2	3	3	4	5	1	3	3	1	2	2	3	4	2	2
131	1	1	2	2	0	0	0	0	2	0	0	1	0	2	0	2	0	0	2	3	3	6	3	3	4	4	3	2	2	5	4	3	2
132	1	1	3	4	0	0	0	0	1	0	0	7	0	4	0	2	0	0	1	4	2	5	3	2	3	6	1	1	4	2	2	3	4
133	1	3	1	1	0	0	0	0	2	1	0	3	0	2	0	1	0	2	2	3	2	4	3	7	1	3	3	0	2	1	2	2	2
134	1	0	0	1	0	0	0	0	1	0	0	2	0	6	0	3	0	0	3	1	2	4	3	3	3	3	2	2	3	2	3	2	2
135	1	0	0	2	0	0	0	0	2	2	0	2	0	0	0	2	0	0	2	3	1	5	1	3	3	3	1	3	1	2	2	2	2
136	1	0	0	3	0	0	0	0	3	0	0	1	0	0	0	0	0	0	1	5	2	4	5	1	2	3	1	3	2	2	3	2	5
137	1	0	0	3	0	0	0	0	4	0	0	4	0	0	0	1	0	0	1	2	3	4	2	3	0	0	2	4	0	0	2	2	4
138	1	3	0	0	0	0	0	0	3	0	0	0	0	2	0	0	0	0	1	2	3	3	4	1	0	4	2	3	0	1	1	1	0
139	1	0	0	2	0	0	0	0	1	0	0	5	0	0	0	2	0	0	2	5	3	4	1	2	0	3	0	1	0	5	4	2	10
140	1	0	2	1	0	0	0	0	5	0	0	0	0	0	0	2	0	0	1	0	2	3	10	0	0	4	4	1	2	3	4	2	3
141	1	0	1	2	0	0	0	0	0	0	0	0	0	0	0	2	0	0	0	6	2	3	2	4	2	3	2	2	4	5	3	1	2
142	1	1	0	3	0	0	0	0	2	0	0	0	0	0	0	1	0	0	6	4	2	3	2	3	0	1	3	3	2	0	4	1	2
143	1	1	0	2	0	0	0	0	3	0	0	1	0	0	0	1	0	1	2	3	3	4	2	6	3	3	1	3	0	2	2	2	1
144	1	0	0	1	0	0	0	0	1	0	0	1	0	0	0	1	0	1	2	3	7	2	2	4	1	7	1	6	3	2	2	1	0
145	1	2	0	1	0	0	0	0	1	0	0	3	0	0	0	3	0	2	3	4	2	4	2	3	2	2	2	3	2	0	3	3	3
146	1	0	5	4	0	0	0	0	2	0	0	1	0	0	0	0	0	0	1	1	4	4	3	3	1	2	0	2	4	1	3	1	4
147	1	0	4	2	0	0	0	0	3	0	0	0	0	0	0	0	0	3	1	4	3	4	6	6	3	3	2	1	2	2	3	1	5
148	1	0	1	2	0	0	0	0	2	0	0	0	0	0	0	1	0	3	2	4	2	4	4	3	2	1	2	2	4	1	5	4	0
149	1	1	4	1	0	4	0	0	2	0	0	0	0	0	0	2	0	0	0	4	2	4	4	7	2	3	3	2	2	2	4	3	3
150	1	0	2	3	0	0	0	0	2	0	0	0	0	0	0	2	0	0	5	2	3	4	3	0	2	4	1	2	2	2	3	5	3
151	1	2	3	14	0	0	0	0	0	0	0	0	0	0	0	1	0	0	3	3	3	5	2	4	4	3	3	1	4	0	1	8	3
152	1	1	1	9	0	0	0	0	1	0	0	1	0	0	0	2	0	0	3	3	2	4	5	3	1	3	2	0	2	1	3	1	1
153	1	2	1	5	0	0	0	0	3	0	0	4	0	0	0	0	0	0	2	2	0	4	6	5	1	3	2	2	4	1	3	1	0
154	1	0	0	9	0	0	0	0	2	0	0	1	0	0	0	0	0	0	1	2	0	1	2	12	0	3	2	2	2	1	3	3	2
155	1	0	0	6	0	0	0	0	2	0	0	2	0	0	0	0	0	0	1	2	0	4	3	5	0	2	2	4	2	1	3	1	0
156	1	3	2	5	0	0	0	0	3	0	0	2	0	0	0	2	0	0	1	2	1	3	0	2	3	2	3	2	2	0	3	1	3
157	1	2	0	4	0	0	0	0	1	0	0	2	0	0	0	1	0	0	0	1	2	4	3	2	0	1	0	14	1	3	2	2	2
158	1	2	0	2	0	0	0	0	1	4	0	4	0	0	0	2	0	0	2	1	2	3	6	3	2	1	0	2	0	2	3	2	2
159	1	0	0	3	0	0	0	0	1	6	0	1	0	1	0	3	0	0	2	3	2	3	7	4	0	2	1	2	3	0	3	6	4
160	1	0	0	5	0	0	0	0	1	0	0	0	0	0	0	3	0	0	1	3	1	3	1	3	2	4	2	0	0	2	2	1	1
161	1	0	1	1	0	0	0	0	2	0	0	0	0	0	0	2	0	0	0	3	2	4	3	2	4	8	1	2	0	1	2	2	0
162	1	2	2	0	0	0	0	0	4	0	0	1	0	1	0	2	0	0	0	3	0	3	6	4	2	4	2	1	7	1	3	2	0
163	1	4	4	1	0	0	0	0	3	0	0	2	0	0	0	1	0	0	2	4	3	4	4	5	2	2	2	2	1	0	2	3	1
164	1	0	1	2	0	0	0	0	2	0	0	3	0	0	0	1	0	0	1	3	1	5	2	4	0	3	3	2	1	2	3	3	2
165	1	1	0	2	0	0	0	0	1	0	0	3	0	0	0	3	0	0	2	2	2	0	2	6	4	4	2	2	5	0	1	1	3
166	1	1	0	1	0	0	0	0	2	0	0	0	0	0	0	1	0	0	5	3	2	0	5	4	2	3	2	2	4	1	2	2	2
167	1	0	3	0	0	0	0	0	4	0	0	0	0	0	0	1	0	0	1	3	1	0	2	4	2	3	3	2	3	3	3	2	2
168	1	0	1	2	0	0	0	0	0	0	0	0	0	0	0	1	0	0	2	3	1	0	3	3	0	0	2	2	1	2	2	0	2
169	1	0	1	0	0	0	0	0	2	0	0	0	0	0	0	0	0	0	1	1	2	0	0	1	2	3	0	1	0	0	1	1	2
170	1	0	3	0	0	0	0	0	2	0	0	3	0	0	0	0	0	0	0	2	0	0	0	2	1	3	1	1	1	0	3	1	2
171	1	0	1	2	0	0	0	0	2	0	0	2	0	0	0	3	0	0	3	2	2	1	0	2	0	3	2	5	3	0	3	1	3
172	1	0	3	5	0	9	0	0	0	0	0	2	0	0	0	1	0	0	2	2	2	4	0	1	2	1	0	6	1	1	2	0	1
173	1	4	1	3	0	2	0	0	1	0	0	0	0	0	0	1	0	0	3	3	2	4	0	5	3	0	4	1	2	3	3	0	0
174	1	2	0	1	0	3	0	0	1	0	0	0	0	0	0	2	0	0	1	1	2	2	0	4	0	4	2	1	3	2	2	3	5
175	1	2	0	1	0	0	0	0	1	0	0	0	0	0	1	0	0	0	1	2	2	4	0	14	3	3	2	2	2	1	2	1	2
176	1	0	0	2	0	0	0	0	3	0	0	0	0	0	0	0	0	0	1	2	0	3	0	4	4	5	0	5	2	0	2	2	3
177	1	2	0	1	0	0	0	0	0	0	0	0	0	0	0	2	0	0	5	6	2	4	0	4	2	3	1	0	2	2	3	2	2
178	1	2	0	2	0	0	0	0	1	0	0	0	0	0	1	0	0	0	2	2	1	3	0	4	3	6	2	1	2	4	3	3	3
179	1	3	0	1	0	0	0	0	2	0	0	0	0	0	0	0	0	0	1	3	3	3	0	5	2	3	1	4	2	3	2	2	1
180	1	6	0	0	0	0	0	0	2	0	0	0	0	0	0	2	0	0	2	4	1	2	0	2	2	3	2	1	2	0	2	1	2
181	1	2	0	0	0	0	0	0	3	0	0	0	0	0	0	3	0	0	1	3	1	4	0	3	2	3	2	6	1	0	2	2	3
182	1	2	0	0	0	6	0	0	1	0	0	0	0	0	2	1	0	0	3	3	3	3	0	4	2	2	2	2	3	3	2	0	3
183	1	1	0	0	0	2	0	0	2	0	0	1	3	0	0	0	0	0	2	3	0	1	0	3	2	2	3	2	2	0	0	2	1
184	1	0	0	0	0	0	0	0	1	0	0	4	1	0	0	1	0	0	4	3	0	4	0	2	2	3	2	0	0	0	2	2	0
185	1	0	1	0	0	0	0	0	3	0	0	2	0	0	0	3	0	0	3	3	0	4	0	1	1	3	2	1	0	2	1	1	0
186	1	0	1	1	0	0	0	0	1	0	0	2	1	0	0	1	0	0	2	2	0	3	1	1	1	1	1	2	0	0	3	2	0
187	1	0	0	1	0	0	0	0	1	5	0	0	0	0	0	1	0	0	0	2	0	3	2	0	1	2	1	1	3	1	12	4	0
188	1	0	5	0	1	0	0	0	1	2	0	3	0	0	0	2	0	0	0	1	1	3	3	1	1	2	0	0	0	1	3	1	0
189	1	1	2	1	0	0	0	0	6	0	0	2	0	0	0	2	0	0	1	2	0	3	2	3	2	0	0	1	1	2	2	0	0
190	1	3	1	0	0	0	0	0	3	1	0	0	0	0	0	1	0	0	3	3	0	3	2	3	2	5	1	1	3	0	3	2	0
191	1	3	0	3	0	0	0	0	2	3	0	0	0	0	0	2	0	0	2	3	0	2	3	2	1	3	1	0	1	0	0	3	0
192	1	6	1	6	0	0	0	0	1	0	0	0	0	0	0	2	0	0	1	5	1	2	3	1	1	5	1	1	3	3	3	13	15
193	1	1	0	7	0	0	0	0	3	0	0	0	0	0	0	2	0	0	3	3	2	4	4	5	2	2	0	2	2	2	2	0	20
194	1	5	3	2	0	0	0	0	1	0	0	0	0	0	0	2	0	0	0	3	2	4	2	3	4	4	3	1	2	1	3	3	1
195	1	1	1	3	0	0	0	0	3	0	0	0	0	0	0	2	0	0	2	2	0	0	2	3	0	1	2	2	3	1	2	13	2
196	1	1	1	3	0	0	0	0	3	0	0	0	0	0	0	0	0	0	4	3	0	1	3	3	2	3	0	24	3	0	2	1	3
197	1	1	1	3	0	0	0	0	39	0	0	0	0	0	0	5	0	0	4	3	0	3	2	1	1	3	3	4	4	0	3	1	4
198	1	0	0	3	0	0	0	0	1	0	0	0	0	0	0	0	0	0	2	2	0	3	1	3	1	2	5	0	1	2	1	0	5
199	1	2	0	0	0	0	0	0	2	0	0	0	0	0	0	0	0	0	3	2	0	3	2	3	2	2	0	2	0	0	2	0	2
200	1	3	0	2	2	0	0	0	2	0	0	0	0	0	0	0	0	0	0	3	0	3	3	2	2	2	0	2	0	0	2	0	1
201	1	5	0	5	0	0	0	0	2	0	0	0	0	0	0	0	0	0	4	4	0	3	2	1	0	3	1	3	0	0	1	0	4
202	1	0	0	0	2	0	0	0	1	0	0	0	0	0	0	3	0	0	1	1	0	3	3	2	3	4	0	0	0	0	2	2	0
203	1	1	0	0	3	10	0	0	0	0	0	0	0	0	0	1	0	0	0	4	0	2	3	3	0	1	1	0	0	0	3	1	2
204	1	0	2	1	0	2	0	0	1	0	0	0	0	0	0	2	0	0	0	3	0	2	2	2	1	3	2	1	0	0	6	2	2
205	1	0	3	3	0	7	0	0	2	0	0	0	0	0	0	1	0	0	1	4	0	2	2	2	2	3	0	2	2	0	4	1	1
206	1	2	3	0	0	0	0	0	2	0	0	0	0	0	0	0	0	0	4	3	0	2	6	3	1	3	1	1	1	3	2	1	2
207	1	3	0	0	0	0	0	0	2	0	0	0	0	0	0	0	0	0	1	2	0	2	4	2	2	1	3	4	1	2	3	3	4
208	1	3	6	0	0	0	0	0	3	0	0	2	0	0	0	0	0	0	1	1	0	3	2	6	3	0	2	1	0	2	0	3	0
209	1	2	2	1	3	0	0	0	4	0	0	2	0	0	0	0	0	0	2	2	0	3	4	3	1	3	3	0	2	2	3	1	2
210	1	1	0	3	4	2	0	0	3	0	0	2	0	0	0	2	0	0	4	1	0	3	4	3	2	4	0	0	2	2	2	0	1
211	1	1	2	0	4	1	0	0	1	0	0	2	0	0	0	3	0	0	2	1	0	3	2	4	1	4	3	2	0	0	3	0	1
212	1	0	2	0	4	5	0	0	1	0	0	2	0	0	0	0	0	0	1	2	0	4	3	5	0	2	1	2	3	2	3	0	3
213	1	1	1	0	1	0	0	0	2	0	0	0	0	0	0	1	0	0	3	2	0	2	0	4	0	1	1	2	0	0	1	0	3
214	1	0	0	5	0	0	0	0	2	0	0	3	0	0	0	1	0	0	1	3	0	3	2	3	0	3	2	1	0	0	2	0	1
215	1	1	0	0	0	2	0	0	2	0	0	3	0	0	0	0	0	0	1	3	0	2	2	3	0	2	2	2	0	0	2	0	2
216	1	0	0	0	0	0	0	0	4	0	0	3	0	0	0	0	0	0	2	1	0	0	1	2	0	5	2	2	0	0	2	0	2
217	1	0	0	5	0	0	0	0	2	0	0	1	0	0	0	0	0	0	2	0	0	1	1	2	1	1	2	1	3	0	2	0	1
218	1	2	0	4	0	0	0	0	1	0	0	0	0	0	0	0	0	0	1	2	0	2	0	2	15	0	0	1	5	0	1	0	4
219	1	0	0	1	0	0	0	0	2	0	0	0	0	0	0	0	0	0	2	2	0	3	0	3	3	4	1	3	4	0	2	0	4
220	1	3	0	6	0	0	0	0	9	0	0	0	0	0	0	0	0	0	3	2	0	3	0	5	2	2	0	2	2	0	8	2	3
221	1	1	0	2	0	0	0	0	3	0	0	0	0	0	0	0	0	0	2	2	0	2	0	2	6	8	0	2	2	0	3	2	5
222	1	0	0	2	0	0	0	0	3	0	0	0	0	0	0	0	0	0	4	9	0	4	0	2	4	3	0	1	2	0	1	2	8
223	1	1	0	2	0	0	0	0	2	0	0	0	0	0	0	2	0	0	0	0	0	4	0	2	3	2	3	2	2	0	1	2	3
224	1	0	0	2	0	0	0	0	2	0	0	0	0	0	0	2	0	0	1	4	0	2	0	3	1	3	1	1	3	0	2	2	5
225	1	2	0	2	0	0	0	0	3	0	0	0	0	0	0	2	0	0	2	1	0	2	0	3	0	1	1	4	2	2	8	3	20
226	1	0	0	3	0	0	0	0	2	0	0	0	0	0	0	2	0	0	1	3	0	3	2	3	1	4	3	10	3	2	2	1	2
227	1	0	0	3	0	0	0	0	2	0	0	0	0	0	0	2	0	0	5	3	0	0	2	3	2	1	1	1	2	2	1	1	1
228	1	0	0	3	0	0	0	0	1	0	0	3	0	0	0	2	0	0	0	2	0	2	2	1	3	0	4	2	0	2	0	4	0
229	1	0	0	0	0	0	0	0	0	0	0	4	0	0	0	0	0	0	1	4	0	1	2	0	2	0	4	2	3	2	0	2	0
230	1	0	0	0	0	0	0	0	2	0	0	3	0	0	0	1	0	0	2	0	0	0	2	0	0	0	2	1	1	7	0	2	0
231	1	0	0	0	0	0	0	0	3	0	0	1	0	0	0	0	0	0	2	2	0	0	3	0	3	0	2	0	0	1	0	1	0
232	1	0	0	0	0	0	0	0	1	0	0	1	0	0	0	1	0	0	0	0	0	0	2	0	2	0	2	22	0	2	2	2	0
233	1	0	2	0	0	0	0	0	1	0	0	1	0	0	0	1	0	0	2	1	0	0	1	0	3	0	2	14	1	3	1	1	0
234	1	1	2	0	0	0	0	0	1	0	0	0	0	0	0	1	0	0	6	0	0	0	1	0	1	0	0	2	0	1	2	0	0
235	1	0	4	2	0	0	0	0	2	0	0	0	0	0	0	1	0	0	1	2	0	1	5	0	2	0	2	0	2	9	4	3	0
236	1	1	1	4	0	0	0	0	1	0	0	0	0	0	0	2	0	0	3	1	0	2	2	0	1	0	1	0	3	0	2	2	0
237	1	3	3	2	0	0	0	0	1	0	0	0	0	0	0	1	0	0	1	0	0	3	11	0	3	0	2	1	1	1	3	1	0
238	1	2	0	2	0	0	0	0	1	0	0	0	0	0	0	1	0	0	1	0	0	0	0	0	1	12	0	1	1	3	3	1	0
239	1	3	0	2	0	0	0	0	2	10	0	0	0	0	0	1	0	0	2	0	0	0	2	1	2	1	1	2	2	1	2	1	0
240	1	2	0	3	0	0	0	0	2	0	0	0	0	0	0	0	0	0	3	0	0	2	2	0	2	3	4	1	2	2	1	2	0
241	1	2	1	0	0	0	0	0	3	0	0	0	0	0	0	2	0	0	3	0	0	2	3	0	2	3	2	1	2	4	2	1	0
242	1	2	0	0	0	0	0	0	1	0	0	0	0	0	0	1	0	0	2	0	0	2	1	1	3	2	0	4	0	0	1	0	0
243	1	0	3	0	0	0	0	0	2	0	0	0	0	0	0	3	0	0	3	0	0	0	0	5	1	3	0	3	0	0	0	0	0
244	1	0	0	2	0	0	0	0	2	0	0	0	0	0	0	1	0	0	6	0	0	1	0	2	0	1	0	4	0	0	3	0	0
245	1	0	3	1	0	0	0	0	1	0	0	0	0	0	0	1	0	0	3	0	1	0	0	2	1	0	0	9	0	0	1	0	0
246	1	0	0	0	0	5	0	0	2	0	0	0	0	0	0	0	0	0	1	0	3	0	0	5	1	0	0	1	0	0	1	0	2
247	1	0	0	0	0	0	0	0	2	0	0	0	0	0	0	0	0	0	1	0	4	0	0	1	0	4	0	3	0	0	1	0	2
248	1	0	1	5	0	0	0	0	1	0	0	0	0	0	0	1	0	0	1	0	2	0	0	1	3	1	0	3	0	0	1	0	1
249	1	3	1	2	0	0	0	0	1	0	0	0	0	0	0	1	0	0	2	0	1	1	0	7	2	3	0	1	0	0	2	0	2
250	1	0	0	3	0	0	0	0	2	0	0	0	0	0	0	0	0	0	6	0	0	0	0	2	0	3	0	3	0	0	2	0	2
251	1	0	0	1	0	0	0	0	10	0	0	0	0	0	0	2	0	0	1	1	0	0	0	3	0	17	2	3	2	0	1	0	1
252	1	1	0	3	0	0	0	0	1	0	0	0	0	0	0	1	0	0	1	0	0	2	0	4	0	5	3	3	2	0	3	0	3
253	1	2	0	3	0	7	0	0	1	0	0	0	0	0	0	2	0	0	1	1	0	2	0	1	1	2	2	1	0	0	0	0	17
254	1	2	0	1	0	2	0	0	1	0	0	0	0	0	0	1	0	0	0	1	2	0	6	4	3	7	2	0	1	0	0	0	4
255	1	0	1	3	0	0	0	0	2	0	0	0	0	0	0	1	0	0	1	2	8	0	2	1	2	4	0	1	2	0	0	2	3
256	1	0	0	0	0	0	0	0	3	0	0	0	0	0	0	2	0	0	1	1	0	0	0	3	1	4	0	0	2	0	0	1	2
257	1	1	3	2	0	0	0	0	2	0	0	0	0	0	0	2	0	0	1	1	0	2	2	1	2	4	0	1	0	0	0	2	3
258	1	0	0	2	0	0	0	0	0	0	0	0	0	0	0	2	0	0	0	1	0	0	0	0	3	0	0	2	4	0	0	1	2
259	1	2	0	3	0	0	0	0	1	0	0	0	0	0	0	2	0	0	1	3	0	0	1	3	1	1	0	1	0	0	0	0	2
260	1	1	0	0	0	0	0	0	0	0	0	0	0	0	0	1	0	0	2	0	0	0	2	3	1	1	0	0	2	0	2	0	3
261	1	0	0	2	0	0	0	0	0	0	0	0	0	0	0	2	0	0	3	0	0	0	1	4	0	0	0	0	0	0	0	0	3
262	1	0	0	1	0	0	0	0	0	0	0	0	0	0	0	0	0	0	4	0	0	0	2	0	0	2	0	6	2	0	0	0	3
263	1	0	0	3	0	0	0	0	1	0	0	0	0	0	0	1	0	0	1	0	0	0	1	3	1	3	0	0	0	0	0	0	2
264	1	0	2	1	0	0	0	0	0	0	0	0	0	0	0	1	0	0	2	0	0	0	2	3	0	0	0	2	0	0	1	0	2
265	1	2	2	3	0	0	0	0	0	0	0	0	0	0	0	3	0	0	2	0	0	0	0	4	0	3	0	2	0	0	0	0	2
266	1	0	1	3	0	0	0	0	0	0	0	0	0	0	0	0	0	0	2	1	0	0	1	3	1	1	0	1	0	0	1	0	14
267	1	1	9	0	0	0	0	0	0	0	0	0	0	0	0	1	0	0	5	0	0	0	1	3	0	2	0	1	0	0	2	0	7
268	1	2	1	1	0	0	0	0	0	0	0	0	0	0	0	1	0	0	2	0	3	0	2	3	0	3	0	2	0	0	2	0	2
269	1	1	3	3	0	0	0	0	0	0	0	0	0	0	0	0	0	0	5	0	1	0	5	3	2	1	0	1	0	0	0	0	0
270	1	0	0	1	0	0	0	0	0	1	0	0	0	0	0	1	0	0	0	1	1	0	3	3	0	2	0	1	0	0	0	0	0
271	1	3	0	0	0	0	0	0	0	5	0	0	0	0	0	1	0	0	2	0	1	0	2	3	0	3	0	0	0	0	0	0	0
272	1	10	0	0	0	0	0	0	0	9	0	2	0	0	0	1	0	0	0	0	4	0	2	4	0	0	0	0	0	0	0	0	0
273	1	0	0	0	0	0	0	0	0	0	0	1	0	0	0	2	0	0	4	0	1	0	2	3	0	0	0	0	0	0	1	0	0
274	1	1	2	0	0	0	0	0	0	0	0	1	0	0	0	1	0	0	2	0	0	0	0	3	0	0	0	0	3	3	1	0	0
275	1	0	3	3	0	0	0	0	0	0	0	0	0	0	0	1	0	0	4	0	0	0	0	3	0	0	0	1	1	1	0	0	0
276	1	0	0	2	0	0	0	0	0	0	0	0	0	0	0	0	0	0	2	0	0	0	0	3	0	0	0	3	0	2	2	0	0
277	1	4	0	0	0	0	0	0	0	0	0	1	0	0	0	0	0	0	1	0	0	0	0	2	0	0	0	1	0	0	1	0	0
278	1	3	0	0	0	0	0	0	0	0	0	2	0	0	0	0	0	0	1	0	0	0	0	2	1	2	0	0	0	0	0	0	0
279	1	0	1	2	0	0	0	0	0	0	0	4	0	0	0	2	0	0	1	0	0	0	0	2	0	0	0	0	0	0	1	1	0
280	1	0	4	3	0	0	0	0	0	0	0	1	0	0	4	0	13	0	0	0	0	0	0	1	3	0	0	0	1	0	2	2	0
281	1	0	1	2	0	0	0	0	0	0	0	0	0	0	0	2	0	0	4	0	0	0	0	2	1	0	0	0	1	0	2	2	0
282	1	0	0	1	0	0	0	0	0	0	0	0	0	0	0	0	0	0	1	0	0	0	0	3	1	0	0	0	1	0	3	2	0
283	1	0	0	1	0	0	0	0	0	0	0	0	0	0	0	1	0	0	1	0	1	0	0	0	0	0	0	0	3	0	0	3	0
284	1	1	0	2	0	0	0	0	0	0	0	0	0	0	0	0	0	0	2	0	2	0	0	10	4	0	0	0	5	0	1	1	0
285	1	1	0	0	0	0	0	0	0	0	0	0	0	0	0	2	0	0	2	0	4	0	0	2	1	0	0	0	4	0	2	3	0
286	1	4	0	1	0	0	0	0	0	0	0	0	0	0	0	2	0	0	1	1	2	0	0	6	1	0	0	0	3	0	2	1	2
287	1	0	0	2	0	0	0	0	0	0	0	0	0	0	0	1	0	0	0	1	2	0	0	4	2	0	0	0	3	0	0	0	3
288	1	1	0	4	0	0	0	0	0	0	0	0	0	0	0	2	0	0	1	0	0	0	0	2	3	0	0	0	2	0	2	2	2
289	1	2	0	1	0	0	0	0	0	0	0	0	0	0	0	1	0	0	3	1	0	0	0	3	1	2	0	0	3	0	0	0	1
290	1	4	0	0	0	0	0	0	0	0	0	0	0	0	0	0	0	0	1	0	0	0	0	0	3	2	0	0	4	0	2	0	0
291	1	0	0	0	0	0	0	0	0	0	0	3	0	0	0	1	0	0	1	0	0	0	0	2	2	4	0	0	2	0	2	0	0
292	1	1	0	0	0	0	0	0	0	0	0	5	0	0	0	0	0	0	1	0	0	0	0	2	2	2	0	0	0	0	0	0	0
293	1	0	0	0	0	0	0	0	0	0	0	2	0	0	0	0	0	0	3	0	0	0	0	1	2	0	0	0	2	0	0	0	0
294	1	0	0	2	0	0	0	0	1	0	0	3	0	0	0	0	0	0	3	0	0	0	0	2	2	2	0	0	0	0	2	0	0
295	1	2	0	1	0	0	0	0	1	0	0	2	0	0	0	0	0	0	2	0	0	0	0	4	2	2	0	0	0	0	0	0	2
296	1	1	0	1	0	0	0	0	4	0	0	3	0	0	0	0	0	0	0	1	0	0	0	1	1	0	0	0	0	0	0	0	4
297	1	0	0	2	0	0	0	0	1	0	0	2	0	0	0	0	0	0	2	0	0	0	0	4	1	3	0	0	2	0	2	0	3
298	1	0	0	2	0	0	0	0	3	0	0	1	0	0	6	2	0	0	2	1	0	0	0	4	3	1	0	1	0	0	5	0	1
299	1	2	0	2	0	0	0	0	4	0	0	4	0	0	0	1	0	0	2	0	0	0	0	2	2	0	0	1	0	0	0	2	0
300	1	0	0	3	0	0	0	0	1	0	0	0	0	0	1	2	0	0	0	1	0	0	0	3	2	0	0	1	0	0	0	2	2
301	1	1	0	2	0	0	0	0	2	0	0	0	0	0	0	1	0	0	0	0	0	0	0	4	2	0	0	2	3	0	2	0	3
302	1	1	0	1	0	0	0	0	11	0	0	0	0	0	0	1	0	0	2	0	0	0	0	3	1	0	0	2	2	0	2	0	2
303	1	0	0	0	0	0	0	0	42	0	0	0	0	0	0	2	0	0	3	0	0	0	2	4	1	0	0	0	1	0	2	0	0
304	1	0	2	2	0	0	0	0	2	0	0	0	0	0	0	1	0	0	3	0	0	0	2	3	0	2	0	1	1	0	2	0	2
305	1	0	0	2	0	0	0	0	0	0	0	0	0	0	0	0	0	0	1	0	0	0	0	3	3	0	0	4	6	0	0	0	2
306	1	0	0	0	0	0	0	0	0	0	0	0	0	0	3	0	0	0	1	0	0	0	0	3	3	0	0	2	1	0	1	0	1
307	1	0	0	0	0	0	0	0	0	0	0	0	0	0	1	0	0	0	2	0	0	0	0	1	1	0	0	2	1	0	0	0	2
308	1	0	0	0	0	0	0	0	0	0	0	0	0	0	0	0	0	0	2	0	0	0	0	3	1	0	0	2	3	0	0	0	0
309	1	4	0	0	0	0	0	0	0	0	0	0	0	0	0	0	0	0	1	0	0	0	0	2	1	0	0	1	2	0	0	0	5
310	1	2	0	0	0	0	0	0	0	0	0	0	0	0	0	0	0	0	2	0	0	0	0	0	2	0	0	2	2	0	0	0	0
311	1	0	0	2	0	0	0	0	0	0	0	0	0	0	0	0	0	0	4	0	0	0	0	2	2	0	0	1	1	0	0	0	0
312	1	0	1	0	0	0	0	0	2	0	0	0	0	0	0	0	0	0	0	0	0	0	0	2	1	0	0	1	3	0	1	0	0
313	1	0	2	2	0	0	0	0	0	0	0	0	0	0	0	0	0	0	1	0	0	0	0	3	0	0	0	1	3	0	4	0	1
314	1	0	0	3	0	0	0	0	1	0	0	0	0	0	0	0	0	0	1	0	0	0	0	4	0	0	0	1	1	0	0	0	0
315	1	0	0	5	0	0	0	0	0	0	0	0	0	0	0	0	0	0	1	0	0	0	0	1	0	0	0	2	3	0	2	0	0
316	1	0	0	2	0	0	0	0	2	0	0	0	0	0	1	0	0	0	1	0	0	0	0	4	2	0	0	0	1	0	2	0	0
317	1	1	0	0	0	0	0	0	1	0	0	0	0	0	0	0	0	0	2	0	0	0	0	2	2	2	0	1	1	0	1	0	1
318	1	2	3	1	0	0	0	0	1	0	0	0	0	0	0	0	0	0	2	0	0	0	0	4	2	2	0	3	3	0	1	0	0
319	1	0	2	0	0	0	0	0	0	0	0	0	0	0	0	2	0	0	2	0	0	0	0	3	2	2	0	0	3	0	2	0	0
320	1	0	2	0	0	1	0	0	0	0	0	0	0	0	0	3	0	0	3	0	0	0	0	2	2	5	0	2	2	0	0	0	1
321	1	1	1	0	0	0	0	0	0	0	0	0	0	0	0	0	0	0	3	0	0	0	0	12	2	2	0	0	2	0	0	0	0
322	1	2	0	0	0	0	0	0	0	0	0	0	0	0	2	0	0	0	2	0	0	0	0	2	0	4	0	0	0	0	0	0	1
323	1	1	0	0	0	0	0	0	0	0	0	0	0	0	0	0	0	0	3	0	0	0	0	4	0	2	0	0	0	0	0	0	0
324	1	1	0	0	0	0	0	0	0	0	0	0	0	0	0	2	0	0	1	0	0	0	0	0	0	3	0	0	0	0	0	0	0
325	1	0	0	0	0	0	0	0	0	0	0	0	0	0	0	1	6	0	1	0	0	0	0	2	0	1	0	0	0	0	0	0	0
326	1	0	0	0	0	0	0	0	0	0	0	0	0	0	0	1	20	0	2	0	0	0	0	3	2	1	0	0	0	0	0	0	0
327	1	0	0	0	0	0	0	0	0	0	0	0	0	0	0	2	1	0	0	0	0	0	0	0	1	2	0	0	0	0	0	0	0
328	1	0	5	0	0	0	0	0	0	0	0	0	0	0	3	1	10	0	1	0	0	0	0	4	3	2	0	0	0	0	0	0	0
329	1	0	0	0	0	0	0	0	0	0	0	0	0	0	0	1	3	0	2	0	0	0	0	3	2	2	0	0	1	0	0	0	0
330	1	0	0	0	0	0	0	0	2	0	0	0	0	0	0	3	2	0	1	0	1	0	0	2	3	0	0	0	3	0	0	0	0
331	1	3	5	1	0	0	0	0	0	0	0	0	0	0	0	2	3	0	0	0	4	0	0	2	1	0	0	0	1	0	0	0	0
332	1	3	2	6	0	0	0	0	1	0	0	0	0	0	0	0	1	0	2	0	12	0	0	2	1	0	0	0	2	0	0	0	0
333	1	1	1	0	0	0	0	0	1	0	0	0	0	0	0	2	0	0	1	0	4	0	0	2	3	0	0	0	1	0	0	0	0
334	1	1	0	0	0	0	0	0	0	0	0	0	0	0	0	1	0	0	6	0	0	0	0	3	2	0	0	0	3	0	0	0	0
335	1	4	4	4	0	0	0	0	1	0	0	0	0	0	1	0	2	0	1	0	0	0	0	3	0	0	0	0	1	0	0	0	0
336	1	1	1	3	0	0	0	0	1	0	0	0	0	0	0	0	14	0	2	0	2	0	0	1	3	0	0	0	2	0	0	0	0
337	1	1	1	6	0	0	0	0	2	0	0	0	0	0	0	0	0	0	1	0	0	0	0	4	0	0	0	0	3	0	0	0	0
338	1	0	2	3	0	0	0	0	0	0	0	0	0	0	0	0	0	0	2	0	0	0	0	1	3	0	0	0	2	0	0	0	0
339	1	0	1	0	0	0	0	0	0	0	0	0	0	0	0	0	0	0	2	0	1	0	0	0	0	0	0	0	1	0	0	0	0
340	1	0	0	6	0	0	0	0	0	0	0	0	0	0	2	0	0	0	0	0	0	0	0	2	0	0	0	0	1	0	0	0	0
341	1	0	1	1	0	0	0	0	0	0	0	0	0	0	0	0	0	0	1	0	0	0	0	1	2	0	0	0	2	0	0	0	0
342	1	1	2	7	0	0	0	0	0	0	0	0	0	0	1	0	0	0	2	0	0	0	0	0	0	0	0	0	0	0	0	0	0
343	1	5	1	38	0	0	0	0	0	0	0	0	0	0	0	0	0	0	5	0	0	0	0	3	1	0	0	0	0	0	0	0	0
344	1	3	0	35	0	2	0	0	0	0	0	0	0	0	2	0	1	0	2	0	3	0	0	2	0	0	0	0	0	0	0	0	0
345	1	1	0	47	0	1	0	0	0	0	0	0	0	0	1	0	1	0	4	0	3	0	0	4	2	0	0	0	0	0	0	0	0
346	1	0	0	13	0	2	0	0	0	0	0	0	0	0	0	0	0	0	0	0	3	0	0	2	2	0	0	0	0	0	0	0	0
347	1	1	0	14	0	0	0	0	0	0	0	0	0	0	0	1	0	0	3	0	3	0	0	3	0	0	0	0	2	0	0	0	0
348	1	0	0	32	0	3	0	0	0	0	0	0	0	0	0	0	0	0	1	0	14	0	0	3	3	0	0	0	3	0	0	0	0
349	1	0	1	3	0	0	0	0	0	0	0	0	0	0	0	2	0	0	0	0	4	0	0	3	1	0	0	0	3	0	0	0	0
350	1	0	0	3	0	0	0	0	0	0	0	0	0	0	0	0	2	0	0	0	1	0	0	1	2	1	0	0	3	0	0	0	0
351	1	0	0	4	0	0	0	0	0	0	0	0	0	0	0	1	5	0	0	0	0	0	0	3	0	2	0	0	3	0	0	0	0
352	1	0	0	4	0	2	0	0	0	0	0	0	0	0	0	1	3	0	0	0	2	0	0	0	0	1	1	2	2	0	0	0	4
353	1	1	0	1	0	0	0	0	0	0	0	0	0	0	4	0	0	0	0	0	0	0	0	2	0	0	5	0	2	0	0	0	0
354	1	1	0	1	0	0	0	0	0	0	0	0	0	0	0	2	0	2	0	0	0	0	0	2	0	0	0	0	0	0	0	0	1
355	1	0	0	0	0	0	0	0	0	0	0	0	0	0	1	1	0	3	0	0	0	0	0	0	0	0	1	0	0	0	0	0	2
356	1	0	3	2	0	1	0	0	0	0	0	0	0	0	0	0	1	4	0	0	2	0	0	3	0	0	0	0	0	0	0	0	2
357	1	1	2	2	0	0	0	0	0	0	0	0	0	0	1	0	6	0	0	0	0	0	0	0	0	0	0	0	0	0	0	0	5
358	1	0	3	2	0	0	0	0	0	0	0	0	0	0	0	0	0	0	0	0	0	2	0	1	1	0	0	0	2	0	0	0	4
359	1	0	2	2	0	0	0	0	0	0	0	0	0	0	0	1	0	0	4	0	2	1	0	0	2	0	0	0	3	0	0	0	2
360	1	0	0	1	0	0	0	0	0	1	0	0	0	0	0	0	0	0	1	0	2	0	0	5	0	0	0	0	2	0	0	0	3
361	1	0	0	0	0	0	0	0	0	7	0	0	0	0	0	1	0	0	2	0	0	0	0	1	3	0	0	0	6	0	0	0	3
362	1	0	0	0	0	0	0	0	0	0	0	0	0	0	0	2	0	0	2	0	0	0	0	3	0	0	0	0	1	0	0	0	3
363	1	3	2	0	0	0	0	0	0	0	0	0	0	0	0	1	0	6	1	0	0	0	0	3	3	0	0	0	3	0	0	0	1
364	1	3	1	0	0	0	0	0	0	0	0	0	0	0	0	1	0	10	2	0	0	0	0	2	1	0	0	0	2	0	0	0	1
365	1	3	1	1	0	0	0	0	0	0	0	0	0	0	0	1	0	1	4	0	0	0	0	0	5	0	0	0	1	0	0	0	2
366	1	1	0	1	0	0	0	0	0	0	0	0	0	0	0	0	0	0	2	0	0	0	0	0	2	3	0	0	0	0	0	0	2
367	1	0	0	10	0	4	0	0	0	1	0	0	4	0	0	1	0	0	2	0	3	0	0	1	3	0	0	0	0	0	0	0	0
368	1	0	0	1	0	1	0	0	0	0	0	0	0	0	0	0	0	0	2	0	0	0	0	3	2	0	0	0	1	0	0	0	3
369	1	2	1	0	0	2	0	0	0	0	0	0	0	0	0	0	0	0	2	0	1	0	0	4	2	2	0	0	0	0	0	0	0
370	1	0	2	0	0	2	0	0	0	0	0	0	0	0	0	0	0	0	1	0	0	0	0	2	1	0	0	0	0	0	0	0	0
371	1	1	0	0	0	4	0	0	0	0	0	0	0	0	0	0	0	0	4	0	0	0	0	2	1	0	1	0	1	0	0	0	0
372	1	2	0	0	0	0	0	0	0	0	0	0	0	0	0	1	0	0	0	0	0	0	0	3	0	2	1	0	0	0	0	0	0
373	1	9	0	0	0	5	0	0	0	0	0	0	0	0	0	2	9	0	3	0	0	0	0	6	2	2	0	0	0	0	0	0	0
374	1	2	0	0	0	1	0	0	0	0	0	0	0	0	8	1	5	0	2	0	0	0	0	1	2	1	0	0	0	0	0	0	0
375	1	3	0	0	0	5	0	0	0	1	0	0	0	0	29	4	6	0	1	0	0	0	0	2	3	2	1	0	0	0	0	0	0
376	1	1	0	4	0	2	0	0	0	0	0	0	0	0	0	1	13	0	0	0	0	0	0	4	0	3	0	0	3	0	0	0	0
377	1	0	0	3	0	0	0	0	0	10	0	0	0	0	0	0	0	0	3	0	0	0	0	2	1	2	8	0	2	0	0	0	0
378	1	1	0	3	0	0	0	0	2	3	0	0	0	0	0	0	0	0	2	0	0	0	0	5	0	0	13	0	0	0	0	0	0
379	1	1	0	1	0	0	0	0	2	9	0	0	0	0	0	0	0	0	2	0	0	0	0	5	0	0	2	0	1	0	0	0	1
380	1	1	0	1	0	0	0	0	1	6	0	0	0	0	0	2	0	0	2	0	0	0	0	4	5	3	2	0	5	0	0	0	2
381	1	0	0	2	0	3	0	0	2	0	0	0	0	0	0	0	0	0	6	0	0	0	0	1	3	3	5	0	4	0	0	0	2
382	1	0	0	0	0	0	0	0	3	0	0	0	0	0	0	0	0	0	2	0	0	0	0	3	2	2	4	0	2	0	0	0	4
383	1	1	0	0	0	1	0	0	2	0	0	0	0	0	0	0	0	0	1	0	0	2	0	4	3	0	0	0	1	0	0	0	2
384	1	0	0	0	0	0	0	0	4	0	0	0	0	0	0	0	0	0	0	0	0	5	0	1	2	0	0	0	0	0	0	0	1
385	1	1	0	0	0	0	0	0	3	0	0	0	0	0	0	0	0	0	0	0	0	5	0	4	1	0	0	0	0	0	0	0	3
386	1	0	0	0	0	1	0	0	1	0	0	0	0	0	0	0	0	0	0	0	0	4	0	0	0	1	0	0	0	0	0	0	2
387	1	1	0	0	0	0	0	0	2	0	0	0	0	0	0	0	0	0	0	0	0	4	0	2	0	1	0	0	0	0	0	0	3
388	1	0	0	0	0	0	0	0	3	0	0	0	0	0	0	2	1	0	0	0	0	1	0	2	4	2	0	0	0	0	0	0	2
389	1	0	0	4	0	0	0	0	2	0	0	0	0	0	8	1	0	0	0	0	0	0	0	2	0	1	0	0	0	0	0	0	4
390	1	0	0	2	0	0	0	0	1	0	0	0	0	0	0	1	19	0	0	0	0	1	0	5	0	4	0	0	4	0	0	0	1
391	1	0	2	0	0	5	0	0	1	0	0	0	0	0	0	2	1	0	1	0	0	4	0	9	2	5	0	0	4	0	0	0	6
392	1	1	0	0	0	0	0	0	2	0	0	0	0	0	0	2	0	0	1	0	0	3	0	3	3	2	0	0	0	0	0	0	2
393	1	2	3	0	0	0	0	0	1	0	0	0	0	0	0	2	0	0	1	0	0	2	0	3	2	2	0	0	0	0	0	0	0
394	1	2	0	0	0	0	0	0	2	0	0	0	0	0	0	1	0	0	2	0	0	0	0	4	0	3	0	0	1	0	0	0	10
395	1	2	1	0	0	0	0	0	2	0	0	0	0	0	0	1	0	0	3	0	0	0	0	2	0	3	0	0	1	0	0	0	0
396	1	2	1	5	0	0	0	0	1	0	0	0	2	0	0	0	0	0	1	0	0	0	0	2	0	0	0	0	0	0	0	0	3
397	1	1	0	3	0	1	0	0	1	0	0	0	0	0	0	0	0	0	0	0	0	0	0	1	0	2	0	0	1	0	0	0	1
398	1	0	0	2	0	6	0	0	0	0	0	0	0	0	0	0	0	0	0	0	0	0	0	4	0	2	0	0	3	0	0	0	0
399	1	1	0	5	12	1	0	0	5	0	0	0	0	0	0	0	0	0	0	0	0	0	0	0	0	3	0	0	4	0	0	0	0
400	1	0	0	4	0	0	0	0	3	0	0	0	0	0	0	0	0	0	2	0	0	0	0	3	0	1	0	0	0	0	0	0	0
401	1	0	0	4	0	3	0	0	0	0	0	0	0	0	0	0	0	0	2	0	0	0	0	2	0	2	0	0	2	0	0	0	0
402	1	0	1	3	0	7	0	0	2	0	0	0	0	0	0	0	0	0	2	0	0	0	0	0	0	0	0	0	6	0	0	0	0
403	1	0	6	1	0	0	0	0	0	0	0	0	0	0	0	1	0	0	4	0	0	0	0	4	0	7	4	0	3	0	0	0	1
404	1	0	1	1	0	0	0	0	0	0	0	0	0	0	0	1	0	0	2	0	0	0	0	3	0	1	0	1	3	0	0	0	0
405	1	0	0	2	0	0	0	0	1	0	0	0	0	0	0	0	0	0	1	0	1	0	0	4	2	2	2	0	4	0	0	0	0
406	1	0	0	1	0	0	0	0	0	0	0	0	0	0	0	0	0	0	2	0	0	0	0	0	1	2	0	0	0	0	0	0	0
407	1	0	0	1	0	0	0	0	1	0	0	0	0	0	0	0	0	0	0	0	0	0	0	2	0	0	6	0	0	0	0	0	0
408	1	0	0	0	0	0	0	0	0	0	0	0	0	0	2	0	0	0	2	0	0	0	0	3	3	2	0	0	1	0	0	0	0
409	1	0	0	0	0	0	0	0	1	0	0	0	0	0	0	0	0	0	2	0	0	0	0	3	1	3	0	0	4	0	0	0	0
410	1	0	0	0	0	0	0	0	3	0	0	0	0	0	0	0	0	0	0	0	0	0	0	2	1	0	0	0	3	0	0	0	0
411	1	0	0	0	0	0	0	0	3	0	0	0	0	0	1	0	0	0	0	0	0	0	0	3	2	1	5	0	2	0	0	0	0
412	1	0	0	0	0	0	0	0	1	0	0	0	0	0	2	0	0	0	2	0	0	0	0	2	3	0	0	0	4	0	0	0	0
413	1	0	0	0	0	0	0	0	3	0	0	0	0	0	0	0	3	0	3	0	0	0	0	2	0	0	0	0	3	0	0	0	0
414	1	0	0	0	0	0	0	0	3	0	0	0	0	0	0	0	0	0	3	0	0	0	0	2	0	0	0	0	2	0	0	0	0
415	1	0	0	0	0	0	0	0	3	0	0	0	0	0	0	0	0	0	3	0	0	0	0	0	0	0	0	0	0	0	0	0	0
416	1	0	0	1	0	0	0	0	3	0	0	0	0	0	0	0	1	0	3	0	0	0	0	3	0	0	0	0	0	0	0	0	0
417	1	0	0	0	0	0	0	0	1	0	0	0	0	0	0	0	0	0	1	0	0	0	0	3	2	0	0	0	1	0	0	0	0
418	1	7	0	3	0	0	0	0	2	0	0	0	0	0	0	0	0	0	2	4	0	0	0	2	0	0	0	0	3	0	0	0	0
419	1	2	0	2	0	0	0	0	0	0	0	0	0	0	1	0	0	0	1	0	0	0	0	3	0	1	0	0	3	0	0	0	0
420	1	1	0	3	0	0	0	0	1	0	0	0	0	0	0	0	0	0	1	0	0	0	0	3	3	1	0	0	4	0	0	2	0
421	1	0	0	4	0	0	0	0	2	0	0	0	0	0	0	0	9	0	0	0	0	0	0	1	2	4	0	0	0	0	0	0	0
422	1	0	0	0	0	0	0	0	1	0	0	0	0	0	0	2	9	0	1	0	0	0	0	1	2	0	0	0	0	0	0	0	0
423	1	1	0	1	0	0	0	0	0	0	0	0	0	0	0	1	7	0	1	0	0	0	0	1	2	2	0	0	0	0	0	0	0
424	1	0	0	2	0	0	0	0	0	0	0	0	0	0	0	2	13	0	2	0	0	0	0	1	1	4	0	0	0	0	0	0	0
425	1	0	0	0	0	0	0	0	2	0	0	0	0	0	0	0	0	0	2	5	0	0	0	2	2	2	0	0	4	0	0	0	0
426	1	3	0	1	0	0	0	0	1	0	0	0	0	0	0	0	0	0	1	0	17	0	0	3	0	2	5	0	2	0	0	0	0
427	1	4	0	0	0	0	0	0	1	0	0	0	0	0	0	0	0	0	2	0	11	0	0	1	0	4	0	0	4	0	0	0	0
428	1	0	0	0	0	0	0	0	0	0	0	0	0	0	1	0	0	0	0	0	5	0	0	1	0	0	0	0	2	0	0	0	0
429	1	0	0	1	0	0	0	0	0	0	0	0	0	0	0	0	0	3	3	0	0	0	0	2	0	2	4	0	0	0	0	4	0
430	1	1	0	0	0	0	0	0	2	0	0	0	0	0	0	0	0	0	2	0	0	0	0	0	0	0	0	0	0	0	0	5	0
431	1	2	0	0	0	0	0	0	0	0	0	0	0	0	0	0	0	0	2	1	0	0	0	0	0	2	1	0	0	0	0	4	0
432	1	1	0	0	0	0	0	0	0	0	0	0	0	0	0	2	0	1	2	0	0	0	0	0	0	2	3	0	3	0	0	4	0
433	1	0	0	0	0	0	0	0	0	0	0	0	0	0	0	0	0	0	1	1	0	0	0	5	2	1	1	0	1	0	0	1	0
434	1	1	0	1	0	0	0	0	0	0	0	0	0	0	0	0	0	0	2	0	4	0	0	3	1	2	0	0	0	0	0	3	0
435	1	6	0	5	0	0	0	0	0	0	0	2	0	0	0	0	1	0	2	3	3	0	0	3	0	2	0	0	0	0	0	3	0
436	1	1	0	1	0	0	0	0	0	0	0	2	0	0	0	0	19	0	0	0	4	0	0	1	0	2	0	0	0	0	0	2	0
437	1	4	0	0	0	0	0	0	0	0	0	0	0	0	0	0	17	0	2	2	2	0	0	3	1	3	0	0	0	0	0	4	0
438	1	3	0	0	0	0	0	0	0	0	0	0	0	0	0	0	11	0	1	1	5	0	0	2	1	3	4	0	4	0	0	1	0
439	1	1	0	0	0	0	0	0	0	0	0	0	0	0	0	0	0	0	7	0	3	0	0	1	1	3	3	0	4	0	0	2	0
440	1	0	0	3	0	0	0	0	0	0	0	0	0	0	0	0	0	0	1	0	2	0	0	2	0	2	3	0	0	0	0	3	2
441	1	0	0	4	0	0	0	0	0	0	0	0	0	0	0	2	0	0	2	1	2	0	0	0	0	1	3	0	0	0	0	3	3
442	1	1	0	2	0	0	0	0	0	0	0	0	0	0	0	1	0	0	1	0	3	0	0	0	0	0	1	0	4	0	0	2	16
443	1	2	0	2	0	0	0	0	0	0	0	1	0	0	4	1	0	0	0	1	1	0	0	0	0	0	0	0	0	0	0	0	2
444	1	0	0	0	0	0	0	0	0	0	0	0	0	0	2	0	6	0	0	0	0	0	0	0	0	0	0	0	2	0	0	0	0
445	1	1	0	0	0	0	0	0	0	0	0	0	0	0	2	0	0	0	0	0	0	0	0	0	0	0	0	0	1	0	0	0	0
446	1	0	0	0	0	0	0	0	0	0	0	0	0	0	0	0	0	0	0	0	3	0	0	0	0	0	0	0	3	0	0	0	1
447	1	0	0	0	0	0	0	0	0	0	0	0	0	0	0	0	0	0	0	1	1	0	0	0	0	0	0	0	0	0	0	2	2
448	1	0	0	0	0	0	0	0	0	0	0	0	0	0	0	0	0	0	0	0	3	0	0	0	0	0	0	0	4	0	0	3	1
449	1	0	0	0	0	0	0	0	0	0	0	0	0	0	0	0	0	0	0	1	0	0	0	1	0	0	0	0	1	0	0	3	0
450	1	0	0	0	0	0	0	0	0	0	0	0	0	0	0	0	1	0	0	1	2	0	0	0	0	3	3	0	1	0	0	1	2
451	1	1	0	1	0	0	0	0	0	0	0	0	0	0	0	3	0	0	1	0	1	0	0	0	0	4	3	0	1	0	0	2	1
452	1	2	0	0	0	0	0	0	0	0	0	2	0	0	0	3	0	0	2	1	3	0	0	1	0	5	4	0	3	0	0	2	0
453	1	2	0	0	0	0	0	0	0	0	0	0	0	0	0	1	1	0	3	1	2	0	0	0	2	4	0	0	2	0	0	3	0
454	1	1	0	5	0	0	0	0	0	0	0	0	0	0	0	3	7	0	5	1	1	0	0	0	0	3	2	0	2	0	0	1	0
455	1	1	0	5	0	0	0	0	0	0	0	1	0	0	0	0	7	0	1	0	1	0	0	1	1	2	4	0	2	0	0	0	2
456	1	0	0	0	0	0	0	0	0	0	0	0	0	0	0	1	0	0	3	1	1	0	0	3	0	2	5	0	4	0	0	2	1
457	1	1	0	1	0	0	0	0	0	0	0	0	0	0	0	1	0	0	3	6	0	0	0	4	0	2	4	0	2	0	0	0	0
458	1	0	0	2	0	0	0	0	0	0	0	0	0	0	2	0	0	0	2	0	0	0	0	2	0	3	1	0	5	0	0	0	2
459	1	1	0	0	0	0	0	0	0	0	0	0	0	0	2	0	0	0	2	6	0	0	0	3	0	1	3	0	2	0	0	0	5
460	1	0	0	0	0	0	0	0	0	0	0	0	0	0	0	0	0	0	2	1	0	0	0	2	0	0	1	0	1	0	0	0	3
461	1	0	0	0	0	0	0	0	0	0	0	0	0	0	0	0	0	0	1	1	0	0	0	1	0	2	0	0	1	0	0	0	2
462	1	0	0	0	0	0	0	0	0	0	0	0	0	0	0	0	1	0	0	0	0	0	0	1	0	0	0	0	0	0	0	0	4
463	1	0	0	0	0	0	0	0	0	0	0	0	0	0	0	0	0	0	1	0	0	0	0	2	0	3	6	0	2	0	0	1	1
464	1	2	0	0	0	0	0	0	0	0	0	0	0	0	0	2	0	0	7	0	0	0	0	2	0	4	2	0	2	0	0	2	4
465	1	4	0	0	0	0	0	0	0	0	0	0	0	0	0	2	0	0	4	0	0	0	0	2	0	4	1	0	2	1	0	2	3
466	1	7	0	0	0	0	0	0	0	0	0	0	0	0	0	4	0	0	1	0	0	0	0	3	0	2	2	0	2	0	0	3	1
467	1	5	0	0	0	0	0	0	0	4	0	0	0	0	0	2	0	0	1	3	0	0	0	2	0	3	3	0	0	0	0	3	10
468	1	1	0	1	0	0	0	0	0	0	0	0	0	0	0	1	0	0	3	1	0	0	0	3	0	5	2	0	0	0	0	3	1
469	1	0	0	7	0	0	0	0	0	0	0	0	0	0	0	3	1	0	4	0	0	0	0	3	0	3	2	0	2	0	0	2	0
470	1	3	0	2	0	0	0	0	0	0	0	0	0	0	0	1	0	0	0	0	0	0	0	6	0	2	3	0	4	0	0	2	0
471	1	0	0	0	0	0	0	0	0	0	0	0	0	0	0	1	0	0	5	0	0	0	0	3	0	2	2	0	3	0	0	4	0
472	1	1	0	2	0	0	0	0	2	0	0	0	0	0	0	0	0	0	1	0	0	0	0	1	0	4	2	0	4	0	0	3	0
473	1	2	0	1	0	0	0	0	1	0	0	0	0	0	0	0	0	0	1	0	0	0	0	2	0	5	2	0	3	0	0	1	0
474	1	2	0	1	0	0	0	0	2	0	0	0	0	0	0	0	0	0	0	0	0	0	0	2	0	2	2	0	4	0	0	2	5
475	1	0	0	0	0	0	0	0	1	0	0	0	0	0	0	0	0	0	0	0	0	0	0	1	0	0	2	0	0	0	0	0	0
476	1	0	0	1	0	0	0	0	2	0	0	0	0	0	0	0	0	0	0	0	0	0	0	4	0	0	4	0	2	0	0	3	0
477	1	0	0	5	0	0	0	0	1	0	0	0	0	0	0	0	0	0	0	0	0	0	0	5	0	0	1	0	3	0	0	1	1
478	1	0	0	2	0	0	0	0	1	0	0	7	0	0	0	0	0	0	0	0	0	0	0	1	0	0	1	0	2	0	0	1	2
479	1	1	0	1	0	0	0	0	0	0	0	7	0	0	0	0	0	0	0	0	0	0	0	2	0	0	1	0	5	9	0	2	4
480	1	1	0	2	0	0	0	0	1	2	0	0	0	0	12	0	0	0	3	0	0	0	0	1	0	5	1	0	4	3	1	3	2
481	1	0	0	3	0	0	0	0	0	7	0	4	0	0	1	0	16	0	3	0	0	0	0	3	0	3	2	0	2	4	0	2	7
482	1	0	0	0	0	0	0	0	2	0	0	0	0	0	2	4	0	0	0	0	0	0	0	3	0	4	2	0	2	0	0	2	3
483	1	0	0	0	0	0	0	0	1	0	0	1	0	0	1	1	0	0	2	0	0	0	0	5	0	2	2	0	2	1	0	1	3
484	1	2	0	0	0	0	0	0	1	4	0	2	0	0	1	2	0	0	2	0	0	0	0	3	0	2	1	0	2	3	0	1	3
485	1	2	0	2	0	0	0	0	3	0	0	0	0	0	1	3	0	0	4	0	0	0	0	3	0	3	2	0	0	1	2	2	2
486	1	0	0	3	0	0	0	0	3	0	0	0	0	0	1	1	0	0	4	0	0	0	0	2	0	2	0	0	0	4	0	3	3
487	1	0	0	1	0	0	0	0	1	0	0	0	0	0	0	1	0	0	2	1	0	0	0	2	0	3	2	0	4	0	0	1	2
488	1	1	0	3	0	0	0	0	2	0	0	0	0	0	1	3	0	0	3	0	1	0	0	3	0	2	3	0	2	0	0	2	5
489	1	0	0	3	0	0	0	0	1	0	0	0	1	0	1	0	4	0	2	1	6	0	0	3	0	0	3	0	0	0	0	2	14
490	1	0	0	3	0	0	0	0	0	0	0	0	0	0	3	0	0	0	2	0	0	0	0	1	0	1	1	0	15	0	0	2	0
491	1	0	0	0	0	0	0	0	0	0	0	0	0	0	3	0	1	0	2	0	4	0	0	1	0	2	1	0	0	0	0	1	0
492	1	0	0	0	0	0	0	0	0	0	0	0	0	0	3	0	0	0	2	0	1	0	0	0	0	4	1	0	0	3	0	1	0
493	1	0	0	0	0	0	0	0	0	0	0	0	0	0	2	2	0	0	3	0	3	0	0	1	0	3	3	0	0	0	0	5	0
494	1	0	0	0	0	0	0	0	0	0	0	0	0	0	3	0	0	0	0	0	3	0	0	0	0	3	2	0	3	2	0	17	1
495	1	0	0	0	0	0	0	0	0	1	0	0	0	0	3	2	0	0	2	0	2	0	0	0	0	4	0	0	2	0	0	4	0
496	1	0	0	0	0	0	0	0	0	0	0	0	0	0	2	2	0	0	0	5	3	0	0	1	0	2	1	0	2	5	0	2	0
497	1	0	0	3	0	0	0	0	0	0	0	0	0	0	4	0	0	0	1	0	3	0	0	21	0	3	1	0	1	3	0	3	0
498	1	0	0	1	0	0	0	0	0	0	0	0	0	0	4	1	0	0	2	1	2	0	0	4	0	3	2	0	2	0	0	3	1
499	1	0	5	3	0	0	0	0	0	0	0	0	0	0	3	1	0	0	3	0	2	0	0	3	0	2	3	0	3	1	0	2	0
500	1	0	6	1	0	0	0	0	0	0	0	0	0	0	4	3	6	0	1	0	0	0	0	4	0	2	2	0	1	0	0	0	0
501	1	0	0	4	0	0	0	0	0	0	0	0	0	0	3	0	0	0	0	0	0	0	0	2	4	3	1	0	2	1	0	2	1
502	1	0	0	3	0	0	0	0	0	0	0	0	0	0	3	0	0	0	0	0	0	0	0	2	1	2	3	0	3	2	0	1	0
503	1	0	0	1	0	0	0	0	0	0	0	0	0	0	5	0	0	0	0	0	0	0	0	3	3	3	0	0	1	0	0	0	0
504	1	0	1	3	0	0	0	0	0	0	0	0	0	0	4	0	0	0	0	0	0	0	0	2	2	2	1	0	2	0	0	0	3
505	1	0	0	0	0	0	0	0	1	0	0	0	2	0	3	0	0	0	0	0	0	0	0	1	3	2	0	0	1	0	0	4	3
506	1	0	1	0	0	0	0	0	4	0	0	0	0	0	4	1	0	0	0	0	0	0	0	0	1	0	0	0	0	0	0	0	3
507	1	0	0	0	0	0	0	0	4	0	0	0	0	0	3	4	0	0	0	0	0	0	0	0	1	0	0	0	0	0	0	2	2
508	1	0	0	0	0	0	0	0	2	0	0	1	0	0	3	1	0	0	0	0	0	0	0	0	0	1	0	0	0	0	0	1	2
509	1	0	0	0	0	0	0	0	2	0	0	2	0	0	1	1	0	0	0	0	0	0	0	1	0	0	0	0	2	0	0	2	2
510	1	0	0	0	0	0	0	0	2	0	0	0	0	0	2	3	0	0	0	2	0	0	0	0	0	0	0	0	2	0	0	1	3
511	1	0	1	3	0	0	0	0	0	0	0	2	0	0	1	1	0	0	0	6	0	0	0	2	0	0	0	0	1	0	0	0	2
512	1	0	1	3	0	0	0	0	1	0	0	2	0	0	0	1	0	0	0	5	0	0	0	3	1	0	0	0	5	0	0	2	3
513	1	0	0	0	0	0	0	0	2	0	0	1	0	0	0	0	0	0	0	4	0	0	0	8	2	3	0	0	3	0	0	3	2
514	1	0	0	2	0	0	0	0	3	0	0	1	0	0	0	0	0	0	0	6	0	0	0	6	3	6	0	0	1	0	0	2	2
515	1	0	1	0	0	0	0	0	2	0	0	1	0	0	0	2	0	0	1	4	0	0	0	4	0	3	0	0	4	0	0	3	3
516	1	0	1	0	0	0	0	0	2	0	0	0	0	0	0	1	0	0	5	5	0	0	0	3	1	2	0	0	2	0	0	1	1
517	1	0	1	0	0	0	0	0	0	0	0	0	0	0	0	1	0	0	3	3	0	0	0	1	0	3	0	0	1	0	0	2	1
518	1	0	0	0	0	0	0	0	1	0	0	0	0	0	0	0	0	0	4	6	0	0	0	4	0	3	0	0	2	0	0	0	0
519	1	0	0	0	0	0	0	0	1	0	0	3	0	0	0	0	0	0	1	3	0	0	4	0	0	2	0	0	3	0	0	3	0
520	1	0	0	0	0	0	0	0	2	0	0	0	3	0	0	0	0	0	3	10	0	0	1	2	3	3	0	0	2	0	0	2	0
521	1	0	0	0	0	0	0	0	4	0	0	0	0	0	0	0	0	0	4	4	0	0	0	5	1	2	0	0	1	0	0	0	0
522	1	0	1	0	0	0	0	0	2	0	0	0	0	0	0	0	0	0	1	7	0	0	0	0	0	1	0	0	0	5	0	2	0
523	1	0	0	0	0	0	0	0	1	0	0	0	0	0	0	4	0	0	8	2	0	0	0	7	0	0	0	0	0	0	0	1	0
524	1	0	0	4	0	0	0	0	2	0	0	0	0	0	0	0	0	0	2	2	0	0	0	4	0	1	0	0	0	0	0	1	0
525	1	0	0	1	0	0	0	0	1	0	0	0	0	0	0	3	0	0	3	3	0	0	0	1	0	2	0	0	0	5	0	1	0
526	1	2	0	3	0	0	0	0	2	0	0	0	0	0	0	0	0	0	3	4	0	0	0	1	0	3	0	0	4	0	0	2	0
527	1	1	4	0	0	0	0	0	2	0	0	9	0	0	0	2	0	0	2	1	2	1	0	9	0	3	0	0	3	5	0	2	0
528	1	0	0	0	0	0	0	0	0	0	0	1	0	0	0	1	0	0	1	3	4	0	0	29	0	1	0	0	3	5	0	2	3
529	1	2	0	0	0	0	0	0	1	0	0	0	0	0	0	1	0	0	0	4	3	0	0	1	0	5	0	0	2	0	0	7	3
530	1	1	0	0	0	0	0	0	2	0	0	0	0	0	0	1	0	0	2	3	4	1	0	2	0	3	0	0	2	0	0	1	2
531	1	0	0	2	0	0	0	0	1	1	0	0	0	0	0	20	0	0	1	2	3	0	0	4	0	3	0	0	4	0	0	2	5
532	1	1	0	4	0	0	0	0	2	0	0	0	0	0	0	3	0	0	1	3	3	0	0	1	0	3	0	0	2	0	0	2	3
533	1	0	0	2	0	0	0	0	2	0	0	0	0	0	0	0	0	0	1	1	5	1	0	2	0	3	0	0	4	2	0	2	4
534	1	0	0	2	0	0	0	0	1	0	0	0	1	0	0	1	0	0	2	4	4	1	0	1	0	3	0	0	3	0	0	1	1
535	1	0	0	0	0	0	0	0	3	0	0	0	6	0	0	2	0	0	1	2	2	1	0	2	0	3	0	0	0	0	0	3	0
536	1	0	0	0	0	0	0	0	3	0	0	0	0	0	0	0	0	0	1	2	1	4	0	1	0	2	0	0	0	0	0	2	0
537	1	0	0	0	0	0	0	0	2	0	0	0	0	0	0	0	0	0	1	2	0	5	0	2	0	2	0	0	0	0	0	1	0
538	1	0	0	0	0	0	0	0	1	0	0	0	0	0	0	0	0	0	1	2	0	3	0	1	0	0	0	0	0	0	0	1	0
539	1	0	0	3	0	0	0	0	1	0	0	0	0	0	0	0	0	0	1	3	1	5	0	0	0	1	0	0	0	0	0	1	0
540	1	0	0	5	0	0	0	0	9	0	0	0	0	0	0	0	0	0	0	4	1	1	0	1	0	14	0	0	0	0	0	7	0
541	1	0	0	1	0	0	0	0	3	0	0	0	0	0	1	1	0	0	0	2	0	4	0	1	0	3	0	0	4	0	0	1	0
542	1	1	0	9	0	0	0	0	0	0	0	0	2	0	3	2	0	0	0	2	0	3	0	6	3	3	0	0	7	0	0	1	0
543	1	0	0	1	0	0	0	0	0	0	0	0	0	0	2	1	0	0	2	3	2	2	0	0	3	3	0	0	3	0	0	4	0
544	1	0	0	5	0	0	0	0	0	3	0	0	0	0	4	1	0	0	3	3	0	0	0	1	1	4	0	0	0	0	0	2	0
545	1	2	0	13	0	0	0	0	1	1	0	0	0	0	17	1	0	0	4	1	0	0	0	3	4	5	0	0	3	0	0	1	4
546	1	2	0	21	0	0	0	0	2	0	0	0	0	0	3	0	0	0	3	3	0	0	0	2	2	4	0	0	1	0	0	2	5
547	1	0	0	42	0	0	0	0	1	1	0	0	3	0	3	0	0	0	6	2	0	0	0	2	2	4	0	0	0	0	0	2	4
548	1	0	0	31	0	0	0	0	2	0	0	0	0	0	3	0	0	0	0	3	0	1	0	3	2	3	0	0	3	0	0	1	2
549	1	3	0	16	0	0	0	0	1	0	0	0	0	0	2	0	0	0	0	4	0	0	0	3	0	1	0	0	4	0	0	0	4
550	1	0	0	2	0	0	0	0	1	2	0	0	0	0	2	2	0	0	0	2	0	0	0	2	2	3	0	0	5	0	0	0	2
551	1	0	0	0	0	0	0	0	2	0	0	0	0	0	0	4	0	0	0	3	0	0	0	2	2	1	0	0	0	0	0	0	2
552	1	0	0	0	0	0	0	0	2	0	0	0	0	0	0	0	0	0	0	2	0	0	0	3	3	3	0	0	3	1	0	0	2
553	1	0	0	0	0	0	0	0	2	0	0	0	0	0	0	0	0	0	0	4	0	0	0	0	3	2	0	0	1	1	0	0	1
554	1	0	0	0	0	0	0	0	2	0	0	0	0	0	0	3	0	0	1	2	0	0	0	9	0	2	0	0	2	0	0	1	5
555	1	0	0	0	0	0	0	0	2	0	0	0	0	0	0	0	0	0	4	3	0	0	0	2	3	2	0	0	2	6	0	3	4
556	1	0	0	0	0	0	0	0	3	0	0	0	0	0	0	3	0	0	2	2	0	0	0	1	1	4	0	0	2	5	0	3	1
557	1	0	2	0	0	0	0	0	2	0	0	0	0	0	0	1	0	0	1	2	0	0	0	3	2	1	0	0	2	2	0	2	1
558	1	0	3	0	0	0	0	0	4	1	0	0	0	0	0	2	0	0	0	2	0	0	0	1	2	3	0	0	4	2	0	1	3
559	1	0	1	0	0	0	0	0	2	0	0	0	0	0	0	3	0	0	2	2	0	0	0	0	1	2	0	0	2	2	0	5	3
560	1	1	0	0	0	0	0	0	1	0	0	0	0	0	0	1	0	0	2	4	0	0	0	3	0	3	0	0	2	5	0	3	2
561	1	0	0	0	0	0	0	0	1	0	0	0	0	0	1	1	0	0	0	4	0	0	0	3	0	2	0	0	4	9	0	1	1
562	1	1	0	1	0	0	0	0	1	0	0	0	0	0	0	0	0	0	0	5	0	0	0	3	1	2	0	0	5	1	0	2	3
563	1	2	0	2	0	0	0	0	2	0	0	0	0	0	0	0	0	0	2	3	0	0	0	2	1	4	0	0	4	4	0	0	2
564	1	0	0	1	0	0	0	0	3	0	0	0	0	0	0	0	0	0	2	3	0	0	0	1	2	3	0	0	3	2	0	1	3
565	1	0	1	2	0	0	0	0	1	0	0	0	0	0	0	0	0	0	3	4	0	0	0	2	2	3	0	0	4	2	0	1	2
566	1	0	0	3	0	0	0	0	1	0	0	0	0	0	0	1	0	0	3	3	0	0	0	3	1	2	0	0	3	1	0	0	2
567	1	19	0	0	0	0	0	0	2	0	0	0	0	0	0	1	0	0	2	2	0	0	0	3	2	1	0	0	3	4	0	1	2
568	1	0	0	0	0	0	0	0	2	0	0	0	0	0	0	2	0	0	1	2	0	0	0	1	2	2	0	0	2	0	0	2	0
569	1	1	0	1	0	0	0	0	1	0	0	0	0	0	0	1	0	0	1	2	0	0	0	3	1	4	0	0	4	2	0	2	3
570	1	0	2	5	0	0	0	0	0	0	0	0	0	0	0	1	0	0	0	4	0	0	0	1	0	1	0	0	3	2	0	2	2
571	1	0	1	0	0	0	0	0	4	0	0	0	0	0	0	0	0	0	0	2	0	0	0	0	2	0	0	0	1	2	0	1	3
572	1	0	0	4	0	0	0	0	2	0	0	0	0	0	0	2	0	0	2	1	0	0	0	1	0	0	0	0	3	2	0	1	3
573	1	0	0	3	0	1	0	0	3	0	0	0	0	0	0	2	0	0	1	13	0	0	0	3	3	0	0	1	1	1	0	0	3
574	1	0	0	3	0	0	0	0	1	0	0	0	0	0	0	0	1	0	3	3	0	0	6	4	3	5	0	1	3	1	0	3	3
575	1	0	2	3	0	0	0	0	1	0	0	0	0	0	0	2	1	0	0	3	0	0	4	3	3	4	0	0	4	5	0	2	2
576	1	0	1	1	0	0	0	0	2	0	0	1	0	0	0	2	0	0	3	3	0	0	3	4	2	3	0	1	2	2	0	3	2
577	1	0	1	0	0	0	0	0	1	0	0	1	0	0	0	0	0	0	1	3	0	0	6	3	3	3	0	0	3	0	0	1	4
578	1	0	1	0	0	0	0	0	3	0	0	2	0	0	0	2	0	0	2	2	0	0	3	3	2	4	0	2	3	6	0	2	2
579	1	0	0	4	0	0	0	0	1	0	0	0	0	0	0	0	0	0	4	3	0	0	7	3	2	3	0	2	2	2	0	2	1
580	1	0	0	0	0	0	0	0	2	0	0	0	0	0	0	2	0	0	2	4	0	0	3	2	2	4	0	1	3	2	0	0	1
581	1	0	0	2	0	0	0	0	1	0	0	0	0	0	0	0	0	0	0	2	0	0	5	2	2	12	0	0	3	2	0	0	0
582	1	0	0	2	0	0	0	0	0	0	0	0	0	0	0	0	0	0	0	2	0	0	4	3	0	1	0	0	0	4	0	1	0
583	1	0	0	0	0	0	0	0	0	0	0	4	0	0	0	3	0	0	1	3	0	0	4	1	0	2	0	0	0	3	0	1	0
584	1	0	0	0	0	0	0	0	0	0	0	1	0	0	0	4	0	0	3	2	0	0	2	0	2	4	0	0	3	1	0	1	0
585	1	0	0	0	0	0	0	0	0	4	0	0	0	0	0	1	0	0	0	3	0	0	1	3	0	2	0	0	4	2	0	0	0
586	1	0	0	2	0	0	0	0	0	0	0	4	0	0	0	3	0	0	2	1	0	0	7	3	1	4	0	0	2	2	0	0	0
587	1	1	0	3	0	0	0	0	1	3	0	1	0	0	0	3	2	0	2	2	0	0	4	1	0	4	0	0	1	3	0	0	0
588	1	1	0	1	0	0	0	0	1	2	0	0	0	0	0	2	3	0	4	4	0	0	3	6	1	2	0	0	3	0	0	2	0
589	1	1	0	1	1	0	2	0	1	1	0	0	0	0	0	0	3	0	4	3	3	0	5	2	0	3	0	0	2	2	0	0	1
590	1	2	1	1	0	0	0	0	2	0	0	0	0	0	0	2	5	0	3	2	6	0	4	1	2	3	0	0	0	2	0	3	4
591	1	0	1	0	0	0	1	0	1	3	0	0	0	0	0	2	4	0	4	3	3	0	3	2	2	3	0	0	4	3	0	2	3
592	1	0	1	2	0	0	5	0	1	2	0	0	0	0	0	2	3	0	1	4	4	0	3	2	2	3	0	0	4	2	0	0	3
593	1	0	1	4	0	0	3	0	2	4	0	0	0	0	0	2	6	1	1	3	4	0	5	3	3	4	0	0	1	5	0	1	2
594	1	2	1	2	14	0	4	0	2	3	0	0	0	0	0	3	4	0	1	3	2	0	4	2	1	2	0	0	5	2	0	0	6
595	1	1	1	1	0	0	1	0	1	3	0	0	0	0	0	1	2	0	3	3	3	0	3	2	0	4	0	0	3	1	0	1	3
596	1	2	2	2	0	0	2	0	2	4	0	0	0	0	0	2	4	0	2	2	2	0	4	0	2	3	0	0	4	1	0	0	1
597	1	2	0	0	5	0	1	0	2	14	0	0	0	0	0	0	3	0	2	2	0	0	4	0	2	2	0	0	4	0	0	1	4
598	1	0	0	0	0	0	15	0	0	1	0	0	0	0	0	1	22	0	3	3	0	0	5	0	0	2	0	0	4	0	0	0	3
599	1	0	0	0	0	0	4	0	2	0	0	0	0	0	0	2	2	0	2	2	0	0	3	0	0	5	0	0	0	0	0	2	2
600	1	0	1	1	1	0	0	0	1	0	0	0	0	0	0	1	3	0	2	0	0	0	3	2	0	2	0	0	3	0	0	2	7
601	1	2	0	3	0	0	0	0	0	0	0	0	0	0	0	2	3	0	2	2	6	0	3	1	0	3	0	1	1	0	0	1	2
602	1	1	3	2	0	1	10	0	3	4	0	0	0	0	1	0	2	0	1	2	4	0	3	1	2	3	0	2	5	2	2	3	2
603	1	0	2	0	1	1	15	0	1	0	0	0	0	0	2	2	4	0	2	3	3	0	3	2	3	3	0	2	2	2	0	3	3
604	1	2	1	4	1	0	7	0	2	0	0	0	0	0	2	2	5	0	6	3	3	0	3	2	4	2	0	4	4	2	0	2	2
605	1	0	0	4	0	4	2	0	2	0	0	0	0	0	2	2	3	0	2	2	6	0	4	4	1	4	0	2	2	3	0	3	0
606	1	1	1	1	0	5	2	0	2	0	0	0	0	0	1	2	0	0	1	4	2	0	4	2	2	2	1	21	3	2	1	1	3
607	1	1	0	1	1	4	4	0	2	0	0	0	0	0	2	1	1	0	0	3	3	0	3	2	3	6	4	3	4	2	3	2	2
608	1	0	1	3	1	5	1	0	1	1	0	0	0	0	3	2	2	0	0	3	4	0	2	3	1	4	3	3	3	0	0	2	2
609	1	0	0	2	0	5	1	0	1	0	0	0	0	0	2	1	3	0	2	2	3	0	3	1	2	4	8	3	3	3	0	2	4
610	1	1	0	2	0	3	0	0	2	0	0	0	0	0	3	2	3	0	2	3	0	0	2	2	1	5	7	4	3	2	0	0	1
611	1	1	0	0	1	1	0	0	1	0	0	0	0	0	3	2	2	0	3	2	2	0	4	4	1	4	5	4	3	1	0	2	1
612	1	1	0	0	1	0	0	0	3	1	0	0	0	0	1	2	4	0	2	2	0	0	4	2	0	2	2	3	1	2	2	1	3
613	1	0	0	0	6	4	0	0	1	0	0	0	0	0	1	0	1	0	3	3	0	0	4	3	1	2	1	2	5	0	3	1	2
614	1	0	0	4	0	4	0	0	0	0	0	0	0	0	0	0	0	0	1	1	0	0	3	0	1	2	2	3	2	0	2	0	6
615	1	0	0	0	0	3	0	0	3	0	0	0	0	0	0	2	1	0	0	3	2	0	5	1	0	2	1	1	3	2	3	2	0
616	1	0	1	5	1	3	0	0	2	0	0	0	0	0	0	2	4	0	5	1	4	0	3	4	0	1	5	2	2	1	2	2	2
617	1	0	2	0	0	5	12	0	0	2	0	0	0	3	0	3	2	0	1	2	3	0	7	2	0	4	5	3	3	3	4	1	0
618	1	3	1	6	2	3	0	0	3	12	0	0	0	0	0	0	3	0	0	2	3	4	3	2	2	2	2	3	3	0	4	2	2
619	1	1	16	2	0	2	0	0	2	1	0	0	0	0	0	2	2	0	0	2	4	2	6	4	1	4	1	1	4	3	3	1	5
620	1	0	1	3	1	5	0	0	1	1	0	0	0	0	0	2	4	0	4	4	3	3	3	4	3	3	3	2	1	1	4	2	6
621	1	2	0	6	0	3	0	0	1	2	0	0	0	0	0	1	3	0	5	3	3	3	5	2	0	1	1	2	4	2	5	3	1
622	1	0	0	4	0	3	0	0	1	1	0	0	0	0	0	3	1	0	2	2	4	3	4	2	4	0	1	9	3	2	3	4	1
623	1	0	0	2	1	2	1	0	3	1	0	0	0	0	0	2	0	0	5	3	2	3	5	1	2	0	3	3	2	0	3	2	2
624	1	0	0	1	0	4	0	0	1	1	0	0	0	2	0	2	0	0	6	3	0	8	3	2	1	0	1	3	26	2	4	1	5
625	1	0	0	1	1	3	0	0	2	7	0	0	0	0	0	2	0	0	1	3	0	2	3	3	1	0	2	2	3	1	3	4	1
626	1	4	0	2	0	4	0	0	2	2	0	5	0	4	0	2	0	0	1	2	2	2	3	2	2	0	4	3	3	3	4	1	3
627	1	1	2	5	2	2	1	0	2	3	0	3	0	8	7	0	0	0	1	1	2	2	2	3	1	0	1	7	1	0	0	1	1
628	1	2	0	0	0	4	0	0	0	12	0	3	0	0	0	1	0	0	0	3	2	3	2	2	1	0	0	3	2	0	3	2	3
629	1	6	0	0	1	1	0	0	3	5	0	5	0	0	1	2	0	0	2	2	3	2	3	2	2	0	0	2	0	0	8	1	2
630	1	5	0	2	1	2	0	0	1	6	0	5	0	0	6	0	2	0	1	4	3	1	0	1	0	0	4	3	0	1	3	0	1
631	1	2	3	5	0	1	0	0	2	4	0	1	0	0	0	0	1	0	4	1	2	3	4	1	0	0	4	2	0	1	2	3	5
632	1	5	1	2	0	3	0	0	5	1	0	4	2	0	0	0	3	0	4	3	3	3	2	2	0	0	1	1	0	4	5	3	2
633	1	2	2	0	0	3	0	0	1	0	0	2	1	0	0	0	4	0	0	2	3	5	3	5	2	5	3	1	0	1	3	1	4
634	1	2	1	0	1	1	0	3	5	0	0	1	0	0	1	0	0	0	3	2	3	3	5	1	2	4	2	2	0	2	6	2	0
635	1	4	2	5	0	4	1	0	1	1	0	5	0	0	3	1	6	0	4	2	3	3	6	5	2	3	2	2	0	2	3	2	4
636	1	1	1	1	0	2	2	0	1	1	1	2	1	0	5	2	2	0	3	3	8	5	4	4	1	5	2	2	0	8	3	1	1
637	1	1	1	3	0	4	0	0	2	3	2	4	0	0	3	2	3	0	1	3	5	3	3	2	2	4	4	4	0	1	4	2	4
638	1	1	4	1	4	0	2	0	1	1	2	3	2	0	2	2	3	0	4	5	3	2	2	3	2	3	1	4	3	2	6	2	1
639	1	0	1	2	4	0	2	0	2	2	0	5	0	0	4	2	4	2	1	3	4	3	3	3	3	5	1	3	3	1	4	1	3
640	1	2	1	2	0	0	0	0	2	0	4	1	0	0	2	1	4	3	1	4	2	6	2	3	1	5	5	2	4	2	3	3	2
641	1	3	1	7	0	0	0	0	1	5	4	3	1	0	3	1	2	2	1	3	3	11	3	2	0	4	2	1	2	2	5	3	3
642	1	1	4	13	6	0	0	0	2	3	3	2	1	0	1	1	4	0	3	3	4	0	5	3	0	1	2	1	2	2	4	2	3
643	1	1	0	13	3	0	0	0	0	0	1	3	1	0	0	2	2	0	3	2	2	0	3	1	2	4	0	2	2	2	3	1	3
644	1	0	0	0	2	0	0	0	0	6	5	2	0	0	1	1	2	0	0	2	2	0	2	3	2	3	2	3	3	0	4	2	0
645	1	0	1	0	0	2	0	0	0	0	2	0	0	0	0	2	3	3	2	1	2	0	2	1	4	3	2	2	4	1	2	0	1
646	1	0	5	0	5	1	2	0	3	1	0	5	1	0	1	2	3	6	4	2	6	3	2	2	0	7	0	0	3	3	4	0	3
647	1	0	4	0	0	3	1	0	2	0	0	0	0	0	2	2	2	3	5	2	2	2	2	4	0	6	4	5	3	3	5	0	3
648	1	0	2	5	0	4	4	0	2	0	0	2	1	0	0	2	2	3	0	2	1	5	3	0	2	3	2	1	2	3	4	2	2
649	1	0	1	1	0	2	4	0	2	2	0	2	0	0	2	2	4	3	2	2	3	4	2	2	2	3	1	1	4	2	3	3	2
650	1	0	3	4	0	6	5	0	2	1	0	2	0	2	0	1	2	3	3	5	3	4	3	1	2	4	3	0	4	2	4	2	6
651	1	2	1	7	5	3	2	0	1	3	3	3	4	0	1	1	4	3	4	1	2	4	3	3	0	1	2	2	4	2	5	3	0
652	1	2	0	1	5	3	3	0	3	3	3	2	0	0	0	3	2	3	2	3	4	5	5	5	2	4	2	2	1	2	3	1	0
653	1	5	5	2	3	3	1	0	2	9	2	1	2	0	1	2	4	4	1	2	2	3	5	2	5	3	1	3	2	4	3	3	0
654	1	1	2	1	3	2	2	0	3	0	7	3	5	2	0	3	2	2	3	3	2	3	3	3	2	4	2	2	3	1	2	2	5
655	1	0	3	0	3	3	1	0	3	0	3	2	1	1	0	2	0	4	1	3	2	5	5	2	2	3	0	2	3	2	2	1	4
656	1	1	0	3	3	1	0	0	0	0	2	1	0	2	0	2	1	6	0	2	2	4	6	2	3	14	3	3	2	2	2	2	4
657	1	0	1	3	2	2	0	0	1	0	0	6	0	0	0	1	3	3	1	3	2	5	3	2	1	10	4	3	4	2	3	2	3
658	1	0	0	0	3	0	9	0	2	0	0	2	0	0	0	3	2	5	0	2	2	4	2	3	0	2	2	1	2	0	2	1	3
659	1	0	4	2	1	2	12	0	2	0	0	2	0	0	0	1	0	4	1	4	2	2	3	1	0	3	1	2	2	2	4	1	3
660	1	0	1	3	0	2	18	0	0	0	0	2	0	0	0	1	2	4	1	3	4	4	1	3	3	2	1	2	4	2	2	1	2
661	1	0	2	2	0	3	4	0	1	0	0	0	0	2	0	0	2	15	0	1	5	2	3	0	3	5	3	0	4	2	2	0	0
662	1	0	0	2	0	0	3	0	0	0	1	1	0	5	1	0	2	4	1	4	3	4	3	1	1	1	1	2	5	1	3	4	8
663	1	2	0	5	1	4	5	0	2	0	0	2	0	5	0	0	2	0	1	3	2	4	6	2	3	5	2	3	4	4	3	2	1
664	1	2	2	0	3	4	4	0	2	3	2	0	1	4	1	2	3	2	2	4	3	2	5	3	2	2	3	0	4	2	1	3	1
665	1	0	1	1	4	3	3	1	2	20	2	3	1	0	3	1	3	1	1	4	6	2	2	3	3	3	5	2	5	2	3	3	1
666	1	0	3	4	2	7	4	0	2	2	3	1	0	5	3	4	3	3	1	3	2	5	3	11	1	3	2	0	4	2	3	11	1
667	1	0	0	0	2	2	3	1	2	4	17	4	0	5	2	3	3	13	0	4	4	4	4	6	2	4	4	3	3	1	6	2	3
668	1	2	0	0	1	4	4	0	0	3	2	3	2	2	2	3	5	4	2	4	4	5	2	3	1	3	1	3	3	3	4	4	3
669	1	1	3	1	5	2	0	0	3	4	0	3	2	1	2	1	0	6	4	2	3	4	2	4	3	3	3	1	4	2	5	0	6
670	1	1	2	2	3	0	1	0	1	1	11	2	1	6	1	3	2	1	5	3	2	15	4	2	0	4	1	1	3	5	4	2	2
671	1	2	6	0	3	0	1	0	2	2	5	2	0	0	1	0	5	3	2	1	3	3	2	3	2	3	3	3	2	2	2	3	3
672	1	1	0	0	4	0	1	0	2	0	1	2	1	0	2	0	4	4	1	4	2	4	2	4	8	3	2	2	17	4	3	2	2
673	1	0	3	4	2	0	1	3	2	1	1	3	1	0	0	0	4	2	0	3	2	2	4	3	2	2	0	3	2	2	3	1	2
674	1	0	0	3	0	0	6	1	2	0	0	1	2	0	0	4	2	2	1	3	4	4	2	3	3	2	4	2	5	1	2	0	0
675	1	0	1	2	0	0	3	17	1	2	0	1	1	0	0	2	2	2	3	2	1	1	5	1	0	4	2	2	1	1	5	1	0
676	1	0	3	6	2	2	2	8	2	3	0	1	1	1	0	2	2	0	2	3	3	3	2	1	1	2	2	0	3	0	3	1	0
677	1	0	6	34	4	3	2	0	6	5	2	0	1	4	0	3	1	3	4	2	3	4	3	4	0	3	2	0	1	2	1	0	0
678	1	1	4	11	2	5	2	0	3	2	2	2	2	4	0	3	2	4	2	9	3	3	3	1	0	4	1	0	5	2	6	2	0
679	1	1	5	3	2	2	4	6	2	7	3	2	1	1	0	4	4	1	2	5	0	5	5	2	0	3	2	3	2	2	2	2	0
680	1	4	9	1	2	3	5	2	1	3	0	2	1	6	0	4	3	5	3	3	4	3	6	6	1	3	3	0	4	2	3	2	0
681	1	0	5	1	2	4	1	0	1	3	5	3	3	14	0	3	4	3	2	3	4	5	4	6	1	3	1	2	4	1	4	3	0
682	1	0	3	3	0	4	6	4	2	9	7	4	1	5	0	3	5	4	2	2	8	5	3	3	2	3	3	0	2	3	3	2	0
683	1	0	3	1	3	1	2	3	2	3	5	2	2	2	0	2	5	2	1	4	5	4	4	2	2	4	1	1	3	2	4	2	0
684	1	3	4	2	5	3	1	1	0	3	3	3	2	5	0	3	3	4	2	2	4	5	3	7	2	3	3	1	4	3	4	2	0
685	1	0	0	4	4	1	0	1	0	2	2	3	0	4	1	2	0	4	2	2	4	5	2	3	3	3	1	4	3	2	4	1	0
686	1	0	1	2	1	0	0	2	2	1	17	3	1	3	9	2	4	4	2	2	4	3	5	2	1	5	2	2	3	2	5	1	3
687	1	4	0	3	3	2	0	1	1	4	4	1	1	4	6	2	3	4	1	2	3	3	2	2	2	2	3	2	3	2	3	0	1
688	1	1	0	1	1	0	0	0	2	1	1	1	0	1	5	0	4	4	3	2	3	4	2	0	4	3	1	1	4	2	4	3	1
689	1	0	0	2	3	0	0	2	3	0	0	4	0	0	2	1	3	1	2	2	1	2	2	1	2	3	1	1	4	1	4	2	3
690	1	0	3	1	2	2	0	5	1	0	0	1	0	5	1	1	3	2	0	3	2	5	1	2	0	1	2	8	1	1	3	1	2
691	1	0	2	3	2	2	1	0	2	0	0	5	1	5	5	2	2	4	3	3	3	4	6	4	0	3	2	2	2	4	3	0	0
692	1	2	2	2	2	2	0	0	2	1	1	9	1	4	2	1	0	0	3	1	4	4	5	3	0	4	1	6	3	2	5	0	3
693	1	1	3	1	1	4	2	1	2	2	6	2	5	2	0	4	3	3	1	2	3	4	4	1	2	3	1	1	1	4	2	0	2
694	1	3	1	0	1	5	1	1	1	1	2	3	1	5	0	2	2	2	3	3	4	4	3	6	2	2	3	3	5	3	3	0	3
695	1	5	1	1	0	4	6	2	3	1	2	4	4	4	0	2	4	3	2	3	4	4	4	1	2	4	2	3	4	3	1	3	3
696	1	1	0	2	2	2	3	0	1	3	2	2	2	4	0	3	2	4	3	4	3	5	7	3	3	3	2	2	4	2	3	1	4
697	1	1	2	6	4	2	4	4	3	1	2	1	0	3	1	4	2	2	3	4	3	4	3	4	2	2	4	2	4	1	8	2	3
698	1	1	2	2	4	4	2	0	1	4	2	3	3	3	3	3	4	3	2	3	4	5	4	2	1	3	1	2	3	3	3	2	3
699	1	2	3	1	3	2	0	1	1	2	3	16	1	0	2	3	3	3	2	3	4	4	4	3	3	4	1	2	3	2	6	2	4
700	1	0	1	4	2	3	0	1	0	3	3	2	2	3	2	4	4	2	3	2	5	5	4	5	3	4	1	2	3	4	4	4	3
701	1	8	2	3	3	1	0	1	4	3	2	4	2	2	1	3	4	3	3	3	4	4	2	1	0	4	1	1	3	1	3	1	2
702	1	0	3	0	2	4	4	1	0	2	3	1	1	4	2	3	2	5	0	2	1	4	4	0	2	3	2	0	5	2	2	2	4
703	1	0	4	2	2	3	0	0	2	2	3	1	1	4	0	1	2	3	2	2	4	5	3	0	2	4	2	2	6	1	3	1	1
704	1	0	1	0	0	1	0	2	2	1	0	2	1	9	0	1	3	3	2	4	4	2	2	4	2	4	1	2	3	2	2	2	1
705	1	0	1	2	0	0	1	3	2	2	0	2	2	9	0	1	3	3	0	2	1	4	1	2	3	4	1	3	2	2	2	0	1
706	1	0	2	0	0	0	1	7	2	1	0	2	1	4	0	2	2	7	2	2	4	4	6	2	3	4	1	2	3	1	4	0	2
707	1	0	7	3	0	2	2	0	2	2	0	0	1	3	0	1	1	2	3	1	4	5	1	1	0	4	1	1	3	2	3	0	4
708	1	1	14	4	0	3	3	2	0	3	2	3	2	3	3	2	1	6	1	3	2	5	3	1	0	3	3	3	3	3	8	1	2
709	1	3	8	6	0	2	1	0	0	3	2	2	2	3	2	3	4	2	2	3	2	4	2	2	2	2	2	0	4	2	3	9	1
710	1	8	0	8	1	3	3	1	4	2	2	1	2	3	2	2	3	2	2	2	2	4	1	2	2	4	1	0	4	2	2	3	0
711	1	1	0	2	2	2	3	3	3	2	2	3	1	3	3	2	4	2	3	2	7	3	3	5	2	5	1	2	4	4	3	2	0
712	1	0	0	3	3	2	1	2	2	2	4	5	2	3	2	0	3	4	3	3	3	4	7	2	1	3	4	0	4	2	4	3	3
713	1	0	0	2	3	3	4	1	2	5	2	1	2	1	2	3	2	7	4	5	3	5	4	3	1	4	3	2	4	2	2	1	2
714	1	1	2	5	2	5	3	2	3	2	3	2	1	4	1	3	4	4	2	3	4	4	2	2	2	2	1	2	3	2	3	2	0
715	1	1	1	3	2	3	4	4	1	3	3	0	3	1	0	0	2	4	2	4	3	6	3	2	2	4	2	0	4	3	3	0	3
716	1	0	3	3	4	2	4	2	1	6	2	2	2	2	0	2	4	3	3	3	5	4	3	2	3	3	5	0	6	2	4	2	3
717	1	1	1	2	4	3	3	1	1	3	6	1	1	4	2	4	2	4	3	3	3	5	1	2	3	5	2	1	3	2	5	0	3
718	1	1	8	2	2	4	5	4	1	3	5	3	2	2	3	0	2	2	2	3	4	5	4	3	0	3	2	4	3	1	3	2	2
719	1	0	2	2	4	1	5	1	2	5	5	3	0	0	2	0	3	2	0	1	4	4	4	2	3	4	2	3	3	2	3	0	6
720	1	0	2	1	2	2	1	0	1	3	0	2	1	2	3	2	2	6	0	4	2	3	4	3	2	3	2	1	4	2	3	2	2
721	0	0	2	4	5	3	8	3	2	4	4	14	4	4	5	0	4	7	2	1	4	6	5	1	4	4	4	0	5	1	8	0	1
722	0	0	0	1	5	3	6	3	1	5	4	4	3	6	0	3	3	5	5	4	7	4	5	3	5	6	3	6	5	3	6	2	1
723	0	3	2	2	5	5	6	6	5	6	5	4	4	6	3	2	5	5	0	4	4	7	3	5	6	5	3	3	6	3	6	4	2
724	0	0	0	2	4	4	6	5	6	6	4	2	3	4	1	4	5	5	0	5	4	5	3	0	7	10	1	1	6	1	4	4	5
725	0	3	3	2	3	4	6	5	5	7	2	3	5	4	4	4	5	6	2	22	6	5	7	0	5	5	3	2	5	2	5	4	2
726	0	1	7	1	0	4	6	5	2	10	4	3	3	6	0	4	3	4	8	1	5	6	3	0	5	5	4	2	5	2	4	3	2
727	0	2	1	3	2	4	6	5	2	5	6	3	5	7	0	5	4	4	14	1	5	5	3	0	4	5	4	0	4	1	3	4	2
728	0	2	1	0	5	4	5	5	1	5	3	3	4	6	0	4	4	4	4	1	5	6	2	0	4	5	5	11	5	5	3	4	3
729	0	3	3	0	6	4	4	3	6	5	3	4	5	6	0	1	5	3	3	4	4	4	4	0	4	6	3	2	5	7	6	5	2
730	0	2	4	3	6	4	5	5	5	4	4	2	6	4	0	1	4	8	5	5	2	6	4	0	2	16	3	7	3	1	4	2	3
731	0	1	3	3	2	4	6	4	6	4	5	2	4	4	3	2	3	5	5	4	3	6	3	0	2	3	3	4	5	2	4	2	4
732	0	1	4	2	4	4	2	3	3	6	2	4	4	5	2	0	6	3	5	8	5	5	6	0	2	14	4	2	3	3	5	3	5
733	0	3	2	4	2	3	5	5	5	4	4	4	4	6	0	0	3	4	2	5	0	5	5	0	2	3	3	2	3	4	3	4	5
734	0	2	3	4	5	3	3	2	5	5	3	3	2	6	2	0	4	4	4	4	2	5	4	1	2	2	2	3	0	2	3	2	6
735	0	3	3	5	6	4	4	2	2	3	1	4	5	4	3	0	1	3	5	6	2	6	4	5	4	0	1	7	1	2	6	2	0
736	0	3	1	0	5	4	6	2	1	3	4	3	4	6	1	0	4	7	4	0	0	3	4	5	2	0	3	3	4	2	3	0	0
737	0	3	0	0	5	3	4	4	1	3	3	2	3	5	0	0	5	3	3	0	0	5	4	3	3	0	3	2	2	1	4	0	4
738	0	0	1	0	4	2	5	4	6	2	4	2	3	4	0	0	5	3	3	0	0	6	3	0	3	0	5	2	0	2	5	0	3
739	0	0	3	0	1	4	5	4	4	4	2	4	6	4	0	0	3	3	5	0	0	6	13	0	4	0	1	4	0	5	3	0	3
740	0	0	11	0	3	4	4	6	4	4	3	2	4	2	0	0	2	5	5	0	0	4	2	0	5	0	2	0	0	3	4	0	4
741	0	0	2	1	4	2	5	3	2	3	3	3	4	4	0	0	12	5	2	0	0	5	3	2	2	0	2	2	0	2	5	0	3
742	0	0	4	3	5	2	5	4	0	4	3	2	5	5	0	0	10	3	1	0	0	7	3	0	3	0	3	0	0	0	4	0	3
743	0	1	2	5	6	3	12	4	3	10	3	3	4	6	0	0	5	3	4	1	0	5	4	3	3	0	2	6	1	0	3	1	4
744	0	0	3	2	3	0	3	4	5	5	2	1	5	5	0	1	0	2	2	4	0	6	4	3	3	0	4	4	3	1	2	0	1
745	0	5	2	4	2	0	2	4	6	4	3	3	5	5	0	2	1	5	3	2	0	5	4	5	3	0	1	3	0	4	8	2	4
746	0	0	1	2	1	0	4	2	3	4	3	2	4	3	0	0	5	2	1	4	0	5	6	3	0	0	3	2	0	3	4	3	3
747	0	0	0	0	0	0	3	4	2	2	4	3	3	6	0	1	3	3	2	3	0	5	3	1	6	0	2	4	0	1	5	7	1
748	0	2	0	3	0	0	5	4	5	2	1	2	4	3	0	0	2	2	2	1	0	6	3	0	3	0	2	2	0	1	3	3	3
749	0	1	1	2	0	0	4	3	3	3	2	4	3	3	1	0	0	3	3	3	0	4	4	0	3	0	4	2	3	4	2	0	2
750	0	0	2	3	0	0	5	1	3	4	3	2	4	6	1	0	0	4	3	0	0	5	4	2	2	0	2	2	2	2	4	0	2
751	0	0	2	2	0	0	3	1	4	2	4	4	6	4	2	0	0	4	3	2	0	4	2	2	2	0	1	2	0	3	4	2	2
752	0	0	1	0	0	0	2	4	3	5	3	3	3	6	0	0	0	5	3	0	0	5	2	3	4	0	2	0	0	0	4	0	3
753	0	0	3	1	0	0	5	4	3	1	2	2	5	4	1	0	0	3	2	0	0	5	3	2	5	0	1	2	0	9	3	0	10
754	0	2	3	2	0	0	6	4	3	6	4	3	4	6	1	2	1	4	4	0	0	3	3	0	3	0	2	6	0	3	3	0	15
755	0	7	5	3	0	0	3	0	4	2	2	5	7	3	0	0	0	3	1	1	0	5	3	0	3	0	3	2	0	1	3	0	3
756	0	2	8	3	0	0	4	2	5	0	3	4	4	4	0	0	0	3	1	2	0	5	1	0	2	0	11	2	0	1	3	0	4
757	0	7	2	4	0	0	2	4	4	0	0	3	4	3	0	0	0	3	0	2	0	5	3	0	4	0	3	2	0	1	2	0	1
758	0	3	3	3	0	0	4	3	3	0	1	1	7	3	0	0	0	3	0	2	0	5	4	0	0	0	3	3	2	1	19	0	3
759	0	0	3	1	0	0	4	4	2	0	5	4	6	4	0	0	0	1	21	0	0	5	4	0	3	0	2	6	1	1	6	0	3
760	0	5	2	3	0	0	3	3	3	0	3	4	4	3	0	0	0	4	2	0	0	3	5	0	1	0	2	2	0	1	2	0	1
761	0	0	0	0	1	0	3	3	4	0	2	4	5	6	0	0	0	4	2	0	0	4	5	0	5	0	3	3	0	0	2	0	3
762	0	0	3	1	0	0	1	0	3	0	4	8	4	4	0	1	0	3	3	0	0	5	3	0	2	0	0	3	0	0	4	0	3
763	0	2	3	2	0	0	4	9	4	0	4	4	13	2	0	5	0	4	3	0	0	4	2	0	1	0	0	3	0	1	4	0	4
764	0	0	2	4	0	0	5	0	3	0	2	3	5	4	0	2	0	5	3	0	0	3	5	0	2	0	0	1	0	5	1	0	3
765	0	0	2	3	0	0	5	0	6	0	3	5	5	4	0	4	0	2	2	0	0	6	5	0	2	0	5	2	0	3	5	0	3
766	0	9	5	2	0	0	4	0	4	0	1	4	3	5	0	0	0	4	0	0	5	4	4	0	1	0	3	2	0	5	1	0	2
767	0	2	3	2	0	0	18	3	2	0	2	3	3	2	0	0	0	3	3	0	3	4	3	0	3	0	3	4	0	4	4	0	2
768	0	0	1	0	0	0	4	5	3	0	2	3	3	3	0	2	0	4	3	0	2	4	3	0	1	0	5	1	0	4	4	0	3
769	0	0	4	2	0	0	2	2	5	0	3	0	5	5	0	6	3	4	2	0	2	6	2	0	2	0	4	2	0	3	3	0	1
770	0	0	3	2	0	0	3	0	4	0	1	3	4	3	0	0	0	3	2	0	0	4	3	0	2	0	5	0	0	1	3	0	0
771	0	4	4	0	0	0	1	2	2	0	0	4	3	5	0	0	0	5	3	0	0	5	4	0	1	0	4	2	0	1	5	0	0
772	0	3	3	3	0	0	4	2	3	0	1	2	5	5	0	0	0	4	1	0	0	6	4	0	0	0	3	5	0	2	3	0	0
773	0	2	5	3	0	0	4	0	7	0	4	1	1	4	0	0	0	3	3	2	0	6	3	0	0	0	4	3	0	2	4	0	0
774	0	2	1	4	0	0	3	0	6	0	0	4	3	4	0	0	0	4	8	1	0	4	1	0	0	0	4	0	0	4	3	0	0
775	0	2	5	3	0	0	3	0	6	0	0	2	4	3	3	0	0	3	4	2	0	4	2	0	0	0	2	0	0	2	6	0	0
776	0	1	3	0	0	0	0	0	5	0	0	2	0	2	0	0	0	2	0	0	0	6	3	0	0	0	4	3	0	2	4	0	0
777	0	2	0	0	0	0	3	0	3	0	2	1	4	5	1	0	0	3	0	0	0	3	4	6	0	0	2	2	0	3	3	0	0
778	0	1	3	0	0	0	1	0	3	0	4	1	3	4	1	0	0	2	1	0	0	4	4	0	0	1	0	1	0	3	2	0	4
779	0	1	1	0	0	0	4	0	4	0	1	0	8	5	0	0	0	13	3	0	0	4	2	0	0	0	1	1	0	2	5	0	5
780	0	0	3	0	0	0	4	0	3	0	3	0	0	3	0	0	0	6	0	0	0	6	2	2	0	0	1	1	0	2	4	0	5
781	0	2	2	0	0	0	1	0	3	0	6	0	5	2	0	0	0	4	2	0	0	3	4	1	0	0	1	2	0	0	1	0	4
782	0	0	0	0	0	0	2	0	4	0	2	0	2	4	0	0	0	1	2	0	0	4	2	1	0	0	0	2	0	2	0	0	3
783	0	3	0	0	0	0	3	0	2	0	0	4	5	2	0	0	0	0	4	0	0	4	2	0	0	0	0	1	0	1	0	0	47
784	0	1	2	0	0	0	5	0	1	0	0	4	4	5	0	0	0	0	2	0	0	5	0	0	0	0	0	2	0	1	0	0	27
785	0	4	2	0	0	0	2	0	2	0	0	3	3	4	0	0	0	0	0	0	0	5	0	0	0	1	0	1	1	2	0	0	3
786	0	2	5	0	0	0	2	0	1	0	0	3	4	3	0	0	0	0	0	0	0	5	2	0	0	0	0	4	2	2	2	0	1
787	0	4	4	0	0	0	4	0	10	1	0	3	3	4	0	0	0	0	0	0	0	4	8	2	0	0	0	2	3	3	3	0	3
788	0	1	4	12	0	0	6	0	33	0	3	2	3	5	2	0	0	0	0	3	0	5	0	1	0	0	0	3	2	2	1	0	2
789	0	1	4	32	0	0	2	0	7	0	0	2	5	5	0	0	0	0	0	2	0	5	0	3	0	0	0	2	3	3	2	0	3
790	0	4	3	5	0	0	4	0	0	0	0	2	3	3	0	0	0	0	0	4	1	4	0	3	0	0	0	2	0	2	9	0	2
791	0	0	5	0	0	0	4	0	0	0	0	15	4	5	0	0	0	0	0	2	2	5	0	2	0	0	0	3	3	2	0	0	1
792	0	1	4	1	0	0	5	0	0	0	0	2	5	2	0	0	0	0	0	4	2	5	0	1	0	0	0	1	1	1	0	0	4
793	0	2	1	3	0	0	2	0	0	0	0	1	1	5	0	0	0	0	0	5	0	5	0	0	0	0	0	4	0	0	1	0	3
794	0	2	0	2	0	0	0	0	1	0	0	3	4	2	0	0	0	0	0	0	0	5	0	8	0	0	0	1	6	3	3	0	2
795	0	0	0	2	0	0	7	0	1	0	0	1	13	3	0	0	0	0	0	0	0	4	0	0	0	0	0	5	2	2	0	0	2
796	0	0	2	2	0	0	12	0	3	0	0	0	3	4	0	0	0	0	0	0	1	4	0	0	0	0	0	3	2	0	0	0	1
797	0	0	2	4	0	0	0	0	4	0	0	0	4	1	0	0	0	0	0	0	3	4	0	1	0	0	0	4	0	2	3	0	3
798	0	0	3	3	0	0	4	0	3	0	1	0	12	4	0	0	0	0	0	0	3	4	0	1	1	1	0	1	0	0	0	0	1
799	0	0	3	4	0	0	0	0	0	0	0	0	3	4	0	0	0	0	0	0	5	4	2	0	1	0	0	3	0	2	0	0	1
800	0	3	2	3	0	0	0	0	2	0	0	0	0	3	0	0	0	0	0	0	1	6	0	1	0	0	0	0	0	0	0	2	3
801	0	1	0	0	0	0	0	0	0	0	0	0	3	5	0	1	0	0	0	0	4	6	1	0	0	0	0	2	0	0	0	0	2
802	0	0	0	0	0	0	0	0	0	0	0	0	3	3	0	3	0	0	0	0	3	8	4	1	1	0	0	2	0	0	0	4	0
803	0	0	0	1	0	0	0	0	0	0	0	0	2	4	0	0	0	0	0	0	1	5	10	0	0	0	0	3	0	0	0	0	0
804	0	1	0	2	0	0	0	0	0	0	0	0	1	4	0	0	0	0	0	0	1	6	4	0	0	0	0	5	0	0	0	2	0
805	0	2	2	3	0	0	0	0	0	0	0	0	0	4	0	0	0	0	0	0	1	6	0	0	0	0	0	0	0	0	0	0	0
806	0	2	3	0	0	0	0	0	0	0	0	0	0	3	0	0	5	0	0	0	0	4	0	0	1	1	0	0	0	0	0	0	0
807	0	4	3	0	0	0	0	0	0	0	0	0	0	0	0	0	0	0	0	0	0	6	0	0	0	0	0	1	0	0	0	0	0
808	0	18	3	0	2	0	0	0	0	0	0	0	0	0	0	0	0	0	0	0	0	4	0	0	0	0	0	3	0	0	0	0	0
809	0	11	3	0	0	0	0	0	0	0	0	0	0	0	0	0	0	0	0	0	2	5	0	1	0	0	0	1	0	0	0	0	0
810	0	1	2	0	0	0	0	0	0	0	0	0	0	0	0	0	0	0	0	0	0	5	0	0	0	0	0	1	0	0	0	0	0
811	0	0	1	0	0	0	0	0	0	2	0	0	0	0	0	0	0	0	0	0	0	5	1	0	0	0	0	0	0	0	0	0	0
812	0	1	15	1	0	0	0	0	0	0	0	0	0	0	0	0	0	0	0	0	0	3	0	0	0	6	0	0	0	0	0	0	0
813	0	2	7	4	0	0	0	0	0	0	0	0	0	0	0	0	0	0	0	0	0	5	3	0	0	0	0	0	0	0	0	0	0
814	0	4	1	3	0	0	0	0	0	0	0	0	0	0	0	0	0	0	0	0	1	5	0	1	0	0	0	0	0	0	0	0	0
815	0	0	0	2	0	0	0	0	0	0	0	0	0	0	0	0	0	0	0	6	0	5	0	0	0	0	0	0	0	0	0	0	0
816	0	1	3	2	0	0	0	0	0	0	0	0	0	0	0	0	0	0	0	6	0	5	5	0	0	0	0	0	0	0	0	0	0
817	0	0	0	5	0	0	0	0	0	0	0	0	0	0	0	0	0	0	0	6	0	4	0	0	0	0	0	0	0	0	0	0	0
818	0	0	0	1	0	0	0	0	0	0	0	0	0	0	0	0	0	0	0	6	0	5	0	0	0	0	0	0	0	0	0	0	0
819	0	0	0	0	0	0	0	0	0	0	0	0	0	0	0	0	0	0	0	1	0	5	1	0	0	0	0	0	0	0	0	0	0
820	0	0	0	3	0	0	0	0	0	0	0	0	0	0	0	0	0	0	0	4	0	4	0	0	0	0	0	0	0	0	0	0	0
821	0	0	0	1	0	0	0	0	2	0	0	0	0	0	0	0	0	0	0	2	1	4	0	0	0	0	0	0	0	0	0	0	0
822	0	0	0	2	0	0	0	0	0	0	0	0	0	0	0	0	0	0	0	7	0	6	0	0	0	0	0	0	0	0	0	0	0
823	0	0	0	2	0	0	0	0	0	0	0	0	0	0	0	0	0	0	0	3	0	5	3	0	0	0	0	0	0	0	0	0	0
824	0	0	0	15	0	0	0	0	0	1	0	0	0	0	0	0	0	0	0	2	0	3	0	1	0	0	0	0	0	0	0	0	0
825	0	0	0	1	0	0	0	0	0	4	0	0	0	0	0	0	0	0	0	2	0	4	0	0	0	0	0	0	0	0	0	0	0
826	0	0	0	0	0	0	0	0	0	0	0	0	0	0	0	0	0	0	0	1	0	5	0	0	1	0	0	0	0	0	0	0	0
827	0	0	0	0	0	0	0	0	0	1	0	0	0	0	0	0	0	0	0	1	0	5	0	0	1	0	0	0	0	0	0	0	0
828	0	0	0	0	0	0	0	0	0	17	0	0	0	0	0	0	0	0	0	0	1	5	0	0	0	0	0	0	0	0	2	0	0
829	0	0	0	2	0	0	0	0	0	6	0	0	0	0	0	0	0	0	0	2	0	3	0	0	0	0	0	0	0	0	2	0	0
830	0	2	0	2	0	0	0	0	0	5	0	0	0	0	0	0	0	0	0	2	0	6	0	0	0	0	0	0	0	0	0	0	0
831	0	5	0	1	0	0	0	0	0	0	0	0	0	0	0	0	0	0	0	4	0	5	0	0	0	0	0	0	0	0	0	0	0
832	0	1	0	1	0	0	0	0	0	0	0	0	0	0	2	0	0	0	0	0	0	3	0	0	0	0	0	0	0	0	0	0	0
833	0	3	0	5	0	0	0	0	0	0	0	0	0	0	2	0	0	0	0	0	1	4	0	0	0	0	0	0	0	0	0	0	0
834	0	3	0	0	0	0	0	0	0	0	0	0	0	0	10	0	0	0	0	0	0	5	0	0	0	0	0	0	2	0	0	0	0
835	0	3	0	1	0	0	0	0	0	0	0	0	0	0	4	0	0	0	0	2	0	3	2	0	0	0	0	0	0	0	0	0	0
836	0	1	0	4	0	0	0	0	0	0	0	0	0	0	4	0	0	0	0	3	0	5	0	1	0	0	0	0	0	0	0	0	0
837	0	1	0	3	0	0	0	0	0	0	0	0	0	0	24	0	0	0	0	0	0	4	2	0	0	0	0	0	2	0	0	0	0
838	0	5	0	2	0	0	0	0	0	0	0	0	0	0	2	0	0	0	0	0	3	4	2	0	0	0	0	0	0	0	0	0	0
839	0	3	0	3	0	0	0	0	0	0	0	0	0	0	0	0	0	0	0	1	3	3	2	0	0	0	0	0	0	0	0	0	0
840	0	0	0	1	0	0	0	0	0	0	0	0	0	0	0	0	0	0	0	0	0	4	0	0	0	0	0	0	0	0	0	0	0
841	0	4	0	1	0	0	0	0	0	0	0	0	0	0	0	0	0	0	0	0	0	4	0	0	0	0	0	0	0	0	0	0	0
842	0	2	0	1	0	0	0	0	0	0	0	0	0	0	0	0	0	0	0	0	0	4	0	0	0	0	0	0	2	0	0	0	0
843	0	1	0	0	0	0	0	1	0	0	0	0	0	0	0	0	0	0	0	0	0	3	0	1	0	0	0	0	0	0	0	0	0
844	0	0	0	0	0	0	0	0	0	0	0	0	0	0	0	0	0	0	0	0	0	3	0	0	0	0	0	0	0	0	0	0	0
845	0	0	0	0	0	0	0	0	0	4	0	0	0	0	0	0	0	0	0	0	0	3	0	0	0	0	0	0	0	0	0	0	0
846	0	0	0	0	0	0	0	0	0	4	0	0	0	0	3	0	0	0	0	0	0	4	0	0	0	0	0	0	0	0	0	0	0
847	0	0	0	2	0	0	0	0	0	0	0	0	0	0	0	0	0	0	0	0	1	3	0	0	0	0	0	0	0	0	0	0	0
848	0	0	0	2	0	0	0	0	0	0	0	0	0	0	1	0	0	0	0	0	4	3	0	0	0	0	0	0	0	0	0	0	0
849	0	0	0	0	0	0	0	0	0	0	0	0	0	0	1	0	0	0	0	0	0	0	0	0	0	0	0	0	0	0	0	0	0
850	0	9	0	0	0	0	0	0	0	0	0	0	0	0	1	0	0	0	0	0	5	3	0	2	0	0	0	0	0	0	0	0	0
851	0	2	0	2	0	0	3	0	0	0	0	0	0	0	1	0	0	0	0	0	3	3	0	2	0	0	0	0	1	0	0	0	0
852	0	2	0	6	0	0	1	0	0	0	0	0	0	0	0	0	1	0	0	0	5	4	0	2	0	0	0	0	0	0	0	0	0
853	0	1	0	0	0	0	0	0	0	0	0	0	0	0	0	0	0	0	0	0	1	3	0	0	0	0	0	0	0	0	0	0	0
854	0	2	0	3	0	0	0	0	0	0	0	0	0	0	0	0	0	0	0	0	1	4	0	0	0	0	2	0	0	0	0	0	0
855	0	1	0	1	0	0	0	0	0	1	0	0	0	0	0	0	0	0	0	0	0	2	0	0	0	0	2	0	0	0	0	0	0
856	0	4	0	2	0	0	0	0	0	0	0	0	0	0	0	0	0	0	0	0	0	2	0	1	0	0	0	0	0	0	0	0	0
857	0	6	0	0	0	0	0	0	0	1	0	0	0	0	0	0	0	0	0	0	0	0	0	0	2	0	2	0	0	0	0	0	0
858	0	0	0	0	0	0	0	0	0	1	0	0	0	0	0	0	0	0	0	0	0	0	0	0	1	0	1	0	0	0	0	0	0
859	0	5	0	1	0	0	0	0	0	1	0	0	0	0	0	0	0	0	0	0	0	0	0	0	3	0	2	0	0	0	0	0	0
860	0	1	0	3	0	0	0	0	0	0	0	0	0	0	0	0	0	0	0	0	0	0	0	3	1	0	2	0	0	0	0	0	0
861	0	2	0	1	0	0	0	0	0	0	0	0	0	0	0	0	0	0	0	0	0	0	0	16	1	0	0	0	0	0	0	0	0
862	0	1	0	2	0	0	0	0	0	0	0	0	0	0	0	0	0	0	0	0	0	0	0	2	1	0	3	0	0	0	0	0	0
863	0	0	0	1	0	0	0	0	0	0	0	0	0	0	0	0	0	0	0	0	0	0	0	5	3	0	0	0	0	0	0	0	0
864	0	0	1	3	0	0	0	0	0	0	0	0	0	0	0	0	0	0	0	12	0	0	0	0	0	0	0	0	0	0	0	0	0
865	0	0	1	2	0	0	0	0	0	0	0	0	0	0	0	0	0	0	0	2	1	0	0	7	1	0	2	0	0	0	0	0	0
866	0	0	0	0	0	0	0	0	0	0	0	0	0	0	0	0	4	0	0	2	0	0	0	4	3	0	2	0	0	0	0	0	0
867	0	0	0	0	0	0	0	0	0	0	0	0	0	0	0	0	0	0	0	5	0	0	0	4	1	0	9	0	0	0	0	0	0
868	0	0	0	0	0	0	0	0	0	0	0	0	0	0	0	0	0	0	0	3	1	0	0	2	2	0	0	0	0	0	0	0	0
869	0	0	2	0	0	0	0	0	4	0	0	0	0	0	0	0	0	0	0	2	0	0	0	2	1	0	0	0	0	0	0	0	0
870	0	0	2	0	0	0	0	0	9	0	0	0	0	0	0	0	0	0	0	1	0	0	0	0	1	0	0	0	0	0	0	0	0
871	0	0	1	0	0	0	0	0	6	0	0	0	0	0	0	0	0	0	0	1	0	0	0	0	0	0	0	0	0	0	0	0	0
872	0	4	0	0	0	0	0	1	3	0	0	0	0	0	0	0	0	0	0	1	0	0	0	3	0	0	1	0	0	0	0	0	0
873	0	0	0	0	0	0	0	0	0	0	0	0	0	0	0	0	0	0	0	2	0	0	0	4	0	0	0	0	0	0	0	0	0
874	0	0	0	0	0	0	0	0	0	0	0	0	0	0	0	0	0	0	0	2	0	0	0	1	0	0	1	0	0	0	0	0	0
875	0	3	0	0	0	0	0	0	6	0	0	0	0	0	0	0	0	0	0	0	0	0	0	3	0	0	0	0	0	0	0	0	0
876	0	1	0	0	0	0	0	0	7	0	0	0	0	0	0	0	0	0	0	0	0	0	0	8	0	0	1	0	2	0	0	0	0
877	0	2	0	0	0	0	0	0	0	0	0	0	0	0	0	0	0	0	0	1	3	0	0	2	0	0	0	0	0	0	0	0	0
878	0	1	0	0	0	0	0	0	4	4	0	0	0	0	0	0	0	0	0	0	18	0	0	3	0	0	0	0	0	0	0	0	0
879	0	0	0	0	0	0	0	0	1	1	0	0	0	0	0	0	0	0	0	0	13	0	0	4	0	0	1	0	0	0	0	0	0
880	0	1	0	0	0	0	0	0	1	0	0	0	0	0	0	0	0	0	0	0	3	0	0	5	0	0	0	0	2	0	0	0	0
881	0	3	0	0	0	0	0	0	3	2	0	0	0	0	0	0	0	0	0	2	3	0	0	9	0	0	0	0	0	0	0	0	0
882	0	1	0	0	0	0	0	0	4	5	0	0	0	0	1	0	0	0	0	1	5	0	0	7	0	0	0	0	0	0	0	0	0
883	0	2	0	0	0	0	0	0	1	0	0	0	0	0	3	0	0	0	0	0	3	0	0	3	0	0	0	0	0	0	0	0	0
884	0	2	0	0	0	0	0	0	2	1	0	0	0	0	2	0	0	0	0	0	0	0	2	0	0	0	0	0	0	0	0	0	0
885	0	0	0	0	0	0	0	0	3	0	0	0	0	0	2	0	1	0	0	0	0	0	0	1	0	0	1	0	0	0	0	0	0
886	0	2	0	0	0	0	0	0	0	0	0	0	0	0	0	0	0	0	0	0	0	0	0	0	0	0	0	0	0	0	0	1	0
887	0	1	0	0	0	0	2	0	2	0	0	0	0	0	1	0	0	0	0	1	20	0	0	0	0	0	1	0	0	0	0	2	0
888	0	0	0	0	0	0	0	0	1	1	0	0	0	0	0	0	0	0	0	0	0	0	0	0	0	0	0	0	2	0	0	0	0
889	0	2	0	0	0	0	0	0	3	0	0	0	0	0	0	0	0	0	0	0	0	0	0	0	0	0	0	0	0	0	0	2	0
890	0	3	0	0	0	0	0	0	6	0	0	0	0	0	0	0	0	0	0	0	0	0	0	1	0	0	1	0	0	0	0	0	0
891	0	1	0	0	0	0	0	0	1	0	0	0	0	0	0	0	0	0	0	1	0	0	0	2	0	0	0	0	0	0	0	0	0
892	0	3	0	0	0	0	0	0	4	1	0	0	0	0	0	0	0	0	0	2	0	0	0	2	0	0	0	0	0	0	0	0	0
893	0	1	0	0	0	0	0	0	7	0	0	0	0	0	0	0	0	0	0	0	0	0	0	4	0	0	1	0	0	0	0	0	0
894	0	0	0	0	0	0	0	0	2	0	0	0	0	0	0	0	0	0	0	0	0	0	0	10	0	0	0	0	0	0	0	1	0
895	0	0	0	0	0	0	0	0	1	0	0	0	0	0	0	0	0	0	0	1	0	0	0	1	0	0	0	0	0	0	0	0	0
896	0	1	0	0	6	0	0	0	3	1	0	0	0	0	0	0	0	0	0	0	0	0	0	2	0	0	0	0	0	0	0	1	0
897	0	1	0	0	0	0	0	0	1	0	0	0	0	0	2	0	0	0	0	1	0	0	0	2	1	0	0	0	0	0	0	0	0
898	0	3	0	3	0	0	0	0	0	0	0	0	0	0	0	0	0	0	0	0	0	0	0	2	2	0	0	0	0	0	0	0	0
899	0	2	0	3	0	0	0	0	0	0	0	0	0	0	2	0	0	0	0	2	0	0	0	0	2	0	0	0	0	0	0	0	0
900	0	0	0	3	0	0	0	0	0	2	0	0	0	0	1	0	0	0	0	3	0	0	0	2	1	0	5	0	0	0	0	0	0
901	0	0	0	2	0	0	0	0	0	3	0	0	0	0	0	0	0	0	0	2	0	3	0	4	1	0	16	0	0	0	0	0	0
902	0	0	0	3	0	0	0	0	0	1	0	0	0	0	0	0	0	0	0	4	0	2	0	1	1	0	8	0	0	0	0	1	0
903	0	0	0	9	0	0	0	0	0	0	0	0	0	0	0	0	0	0	0	1	0	0	0	1	1	0	0	0	0	0	2	0	0
904	0	0	0	1	0	0	0	0	0	2	0	0	0	0	0	0	0	0	0	2	0	4	0	2	2	0	11	0	0	0	0	0	0
905	0	0	0	4	0	0	0	0	3	0	0	0	0	0	0	0	0	0	0	3	0	2	0	5	0	0	6	0	0	0	0	0	0
906	0	0	0	0	0	0	0	0	0	1	0	0	0	0	0	0	0	0	0	2	4	6	0	1	0	0	10	0	0	0	0	1	0
907	0	0	0	0	0	0	0	0	0	3	0	0	0	0	0	0	0	0	0	1	0	23	0	0	0	0	0	0	0	0	0	0	0
908	0	0	0	1	0	0	0	0	1	0	0	0	0	0	0	0	0	0	0	2	2	1	0	0	0	0	10	0	0	0	0	0	0
909	0	0	0	5	0	0	0	2	4	0	0	0	0	0	0	0	0	0	0	0	0	2	0	0	0	0	3	0	0	0	0	0	0
910	0	0	0	7	0	0	0	0	5	0	0	0	0	0	0	0	0	0	0	0	3	2	0	0	0	0	6	0	0	0	0	1	0
911	0	0	0	25	0	0	0	0	4	0	0	0	0	0	0	0	0	0	0	2	4	0	0	0	2	0	2	0	0	0	0	0	0
912	0	0	0	11	0	0	0	2	2	0	0	0	0	0	0	0	0	0	0	0	0	0	0	0	0	0	2	0	1	0	0	0	0
913	0	0	0	0	0	0	0	0	0	0	0	0	0	0	0	0	0	0	0	2	0	0	0	0	1	0	1	0	0	0	0	0	0
914	0	0	0	0	0	0	0	0	0	0	0	0	0	0	0	0	0	0	0	3	0	0	0	0	7	0	3	0	0	0	0	1	0
915	0	0	0	1	0	0	0	0	0	0	0	0	0	0	0	0	0	0	0	3	0	0	0	0	6	0	4	0	0	0	0	0	0
916	0	0	0	3	0	0	0	0	0	0	0	0	0	0	4	0	0	0	0	4	1	0	0	0	0	0	10	0	0	0	0	0	0
917	0	0	0	5	0	0	0	0	0	0	0	0	0	0	0	0	0	0	0	0	0	0	0	0	1	0	0	0	0	0	0	0	0
918	0	0	0	6	0	0	0	2	2	0	0	0	0	0	2	0	0	0	0	0	0	0	0	0	1	0	0	0	0	0	0	0	0
919	0	0	0	0	0	0	0	0	1	0	0	0	0	0	0	0	0	0	0	0	1	0	0	0	0	0	0	0	9	0	0	0	0
920	0	0	0	2	0	0	0	0	3	0	0	0	0	0	1	1	0	0	0	0	0	0	4	0	6	0	0	0	0	0	0	0	0
921	0	0	0	0	0	0	0	0	1	0	0	0	0	0	0	0	0	0	0	0	3	0	0	0	1	0	0	0	2	0	0	0	0
922	0	0	0	0	0	0	0	0	3	0	0	0	0	0	0	0	0	0	0	0	0	0	1	0	0	0	0	0	2	0	0	1	0
923	0	0	0	0	0	0	0	0	0	0	0	0	0	0	0	0	0	0	0	0	0	0	7	0	1	0	0	0	2	0	0	0	0
924	0	0	0	0	0	0	0	0	0	0	0	0	0	0	0	0	0	0	0	6	0	0	10	0	1	0	0	0	3	0	0	3	0
925	0	0	0	2	0	0	0	0	0	0	0	0	0	0	0	1	0	0	0	8	0	0	13	0	3	0	0	0	2	0	0	0	0
926	0	0	0	0	0	0	0	0	14	0	0	0	0	0	0	0	0	0	0	3	0	0	9	0	5	0	0	0	2	0	0	0	0
927	0	2	0	0	0	0	0	0	12	0	0	0	0	0	0	0	0	0	0	3	3	0	1	0	2	0	0	0	0	0	0	0	0
928	0	2	0	4	0	0	0	0	1	0	0	0	0	0	0	0	0	0	0	5	1	0	2	0	0	0	0	0	0	0	0	0	0
929	0	3	0	2	0	0	0	0	2	1	0	0	0	0	0	0	0	0	0	2	0	0	0	0	0	0	0	0	2	0	0	1	0
930	0	3	0	3	0	0	0	0	4	1	0	0	0	0	0	0	0	0	0	1	0	1	3	0	2	0	0	0	2	0	0	15	0
931	0	0	0	1	0	0	0	0	2	0	0	0	0	0	0	0	0	0	0	1	0	1	4	0	1	0	0	0	0	0	0	2	0
932	0	0	0	0	0	0	0	0	0	0	0	0	0	0	0	0	0	0	0	1	0	0	3	0	1	0	0	0	0	0	0	6	0
933	0	0	0	0	0	0	0	0	0	0	0	0	0	0	0	0	0	0	0	0	0	0	0	0	3	0	0	0	0	0	0	6	0
934	0	1	0	2	0	0	0	0	0	0	0	0	0	0	0	0	0	0	0	1	0	0	0	0	5	0	0	0	0	0	0	0	0
935	0	5	0	6	0	0	0	0	0	0	0	0	0	0	0	0	0	0	0	11	0	0	0	0	4	0	0	0	0	0	0	3	0
936	0	3	0	0	0	0	0	0	0	0	0	0	0	0	0	0	0	1	0	3	0	0	0	0	3	0	0	0	0	0	0	8	0
937	0	3	0	0	0	0	0	0	0	0	0	0	0	0	0	0	0	0	0	3	0	2	0	0	3	0	0	0	0	0	0	1	0
938	0	3	0	0	0	0	0	0	0	0	0	0	0	0	0	0	0	0	0	2	0	2	0	0	2	0	12	0	0	0	0	4	0
939	0	4	0	0	0	0	0	0	0	0	0	0	0	0	0	0	0	0	0	0	0	0	0	0	2	0	3	0	0	0	0	8	0
940	0	1	0	5	0	0	0	0	0	0	0	0	0	0	0	0	0	0	0	0	0	0	0	0	0	0	2	0	0	0	0	1	0
941	0	3	0	4	0	0	0	0	0	0	0	0	0	0	0	0	0	0	0	0	0	2	0	0	3	0	3	0	0	0	0	5	3
942	0	4	0	4	0	0	0	0	0	0	0	0	0	0	0	0	0	0	0	0	0	3	0	0	2	0	7	0	0	0	0	1	1
943	0	2	0	5	0	0	0	0	0	0	0	0	0	0	0	0	0	0	0	0	12	0	0	0	1	0	4	0	0	0	0	0	0
944	0	3	0	0	0	0	0	0	0	0	0	0	0	0	0	0	0	0	0	0	3	0	0	0	2	0	1	0	0	0	0	0	0
945	0	1	0	2	0	0	0	0	0	0	0	0	0	0	0	0	0	0	0	0	2	0	0	1	2	0	25	0	0	0	0	0	0
946	0	0	0	1	0	0	0	0	0	0	0	0	0	0	0	0	0	0	0	0	1	0	0	3	2	0	25	0	0	0	0	0	0
947	0	2	0	3	0	0	0	0	0	0	0	0	0	0	0	0	0	0	0	0	4	0	0	0	1	0	0	0	0	0	0	0	0
948	0	4	0	0	0	0	0	0	0	0	0	0	0	0	0	0	0	0	0	0	1	0	0	0	1	0	0	0	0	0	0	0	0
949	0	3	0	0	0	0	0	0	0	0	0	0	0	0	0	0	0	0	0	0	1	0	0	1	0	0	0	0	0	0	0	0	0
950	0	0	0	0	0	0	0	0	3	0	0	0	0	0	0	0	0	0	0	0	0	0	0	0	0	0	4	0	0	0	0	0	0
951	0	2	0	0	0	0	0	0	0	0	0	0	0	0	0	0	0	0	0	0	8	0	0	2	0	0	0	0	0	0	0	0	0
952	0	0	0	0	0	0	0	0	0	0	0	0	0	0	0	0	3	0	0	0	2	0	0	0	0	0	0	0	0	0	0	0	0
953	0	3	0	0	0	0	0	0	1	0	0	0	0	0	0	0	0	0	0	0	0	0	0	2	0	0	0	0	0	0	2	0	0
954	0	3	0	0	0	0	0	0	2	0	0	0	0	0	0	0	2	0	0	0	0	0	0	1	0	0	0	0	0	0	0	0	0
955	0	1	0	0	0	0	0	0	0	0	0	0	0	0	0	0	0	0	0	0	0	0	0	2	0	0	1	0	0	0	3	0	0
956	0	3	0	0	0	0	0	0	0	6	0	0	0	0	0	0	0	0	0	0	0	0	0	0	0	0	0	0	0	0	0	0	0
957	0	1	0	5	0	0	0	0	1	1	3	0	0	0	0	0	0	0	0	1	0	2	0	2	0	0	0	0	0	0	3	0	0
958	0	2	0	11	0	0	0	0	2	0	0	0	0	0	0	0	0	0	0	1	0	1	0	4	0	0	1	0	0	0	2	0	0
959	0	6	0	12	0	0	7	0	1	3	0	0	0	0	0	0	0	0	0	0	0	1	0	1	0	0	0	0	0	0	2	0	0
960	0	0	0	2	0	0	0	0	4	2	0	0	0	0	0	0	0	0	0	0	0	0	0	0	0	0	0	0	0	0	0	0	0
961	0	0	0	2	0	0	0	0	0	2	0	0	0	0	0	0	0	0	0	0	0	4	0	0	1	0	0	0	0	0	2	0	0
962	0	0	0	6	0	0	0	0	0	3	0	0	0	0	0	0	0	0	0	0	0	0	0	0	0	0	7	0	0	0	1	0	0
963	0	0	0	0	0	0	3	0	0	5	0	0	0	0	0	0	0	0	0	0	0	3	0	0	0	0	0	0	0	0	0	0	0
964	0	0	0	1	0	0	15	1	0	4	0	0	0	0	0	0	0	0	0	0	0	3	2	0	0	0	3	0	0	0	1	0	0
965	0	0	0	5	0	0	0	0	0	2	0	0	0	0	0	0	0	0	0	0	0	2	6	0	0	0	0	0	2	0	0	0	0
966	0	0	0	9	0	0	0	0	0	5	0	0	0	0	0	0	0	0	0	0	0	3	5	0	0	0	0	0	1	0	0	0	0
967	0	0	0	7	0	0	0	2	4	3	0	0	0	0	0	0	0	0	0	1	0	2	2	0	0	0	0	0	4	0	1	0	0
968	0	0	0	5	0	0	0	2	1	3	0	0	0	0	0	0	0	0	0	4	0	8	2	0	0	0	0	0	0	0	1	4	0
969	0	0	1	0	0	0	0	0	6	6	0	0	0	0	0	0	0	0	0	0	0	4	0	0	0	0	0	0	3	0	0	11	0
970	0	0	0	0	0	0	0	1	1	3	1	0	0	0	0	0	0	0	0	8	0	1	4	0	2	0	2	3	0	0	0	8	0
971	0	0	0	0	0	0	0	0	0	0	1	0	0	0	0	0	0	0	0	7	0	0	7	0	0	0	4	0	0	0	1	5	0
972	0	0	1	0	0	0	0	0	0	2	1	0	0	0	0	0	0	0	0	0	0	1	2	0	2	0	0	0	2	0	0	6	0
973	0	0	0	0	0	0	0	0	6	4	0	0	0	0	0	0	0	0	0	5	0	0	0	0	2	0	0	2	3	0	0	5	0
974	0	0	0	0	0	0	0	0	0	2	0	0	0	0	0	0	0	0	0	2	0	0	0	0	3	0	0	0	0	0	0	4	0
975	0	0	0	0	0	0	0	0	0	4	0	0	0	0	0	0	0	0	0	0	0	0	0	5	0	0	0	0	0	0	0	4	0
976	0	0	0	0	0	0	0	0	0	6	0	0	0	0	0	0	0	0	0	0	0	1	0	2	2	0	0	0	0	0	1	7	0
977	0	0	0	4	0	0	0	0	0	3	0	0	0	0	0	0	0	0	0	0	0	0	0	9	3	0	0	0	0	0	0	3	0
978	0	0	0	3	0	0	0	0	0	2	0	0	0	0	0	0	0	0	0	0	0	1	0	2	1	0	0	0	0	0	0	0	0
979	0	1	0	0	0	0	0	0	0	3	0	0	0	0	0	0	0	0	0	0	1	0	0	1	4	0	0	0	0	0	0	0	0
980	0	4	0	0	0	0	0	0	0	4	0	0	0	0	0	0	0	0	0	0	0	0	0	3	3	0	0	0	0	0	0	3	0
981	0	3	0	0	0	0	0	0	0	3	0	0	0	0	0	0	0	0	0	0	3	0	0	3	2	0	0	0	0	0	0	0	0
982	0	5	0	0	0	0	0	0	0	3	0	0	0	0	0	0	0	0	0	0	0	0	0	3	3	0	0	0	0	0	1	0	0
983	0	1	0	0	0	0	0	0	0	2	0	0	0	0	0	0	0	0	0	0	3	2	0	2	11	0	0	0	0	0	0	0	0
984	0	3	0	0	0	0	0	0	0	2	0	0	0	0	2	0	0	0	0	0	0	19	0	0	0	0	0	0	0	0	0	0	0
985	0	3	0	0	0	0	0	0	0	1	0	0	0	0	2	0	0	0	0	0	2	9	0	6	3	0	0	0	0	0	0	3	0
986	0	2	0	0	0	0	0	0	0	4	0	0	0	0	1	0	0	1	0	0	0	7	0	3	5	0	0	0	0	0	0	0	0
987	0	2	0	0	0	0	0	0	0	3	0	0	0	0	0	0	0	2	0	0	1	7	0	2	0	0	0	0	0	0	1	0	0
988	0	1	0	0	0	0	0	0	0	4	0	0	0	0	0	0	0	6	0	0	0	2	0	0	0	0	0	0	0	0	0	0	0
989	0	1	0	0	0	0	0	0	8	1	0	0	0	0	0	0	0	0	0	0	0	1	0	0	0	0	0	0	0	0	0	0	0
990	0	2	0	0	0	0	0	0	19	4	0	0	0	0	0	0	0	0	0	0	1	0	0	2	0	0	0	0	0	0	0	0	0
991	0	2	0	0	0	0	0	0	2	3	0	0	0	0	0	0	0	0	0	0	5	0	0	15	0	0	0	0	0	0	0	0	0
992	0	3	0	3	0	0	0	0	0	3	0	0	0	0	0	0	0	0	0	0	1	3	0	2	0	0	0	0	0	0	0	0	0
993	0	1	0	4	0	0	0	0	0	1	0	0	0	0	0	0	0	0	0	0	0	5	0	3	0	0	0	0	0	0	0	0	0
994	0	2	0	0	0	0	0	2	0	3	0	0	0	0	0	0	0	0	0	0	0	2	0	2	0	0	1	0	0	0	3	0	0
995	0	1	0	0	0	0	0	1	3	2	0	0	0	0	0	0	0	0	0	0	0	1	0	3	0	0	1	1	0	0	0	0	0
996	0	3	0	0	0	0	0	0	0	0	0	0	0	0	0	0	0	0	0	0	0	0	0	1	0	0	0	2	0	0	0	0	0
997	0	1	0	0	0	0	0	0	0	0	0	0	0	0	0	0	0	0	0	0	0	0	0	0	0	0	0	2	0	0	0	0	0
998	0	3	0	0	0	0	0	0	0	0	0	0	0	0	0	0	0	0	0	0	0	0	0	2	0	0	0	1	0	0	0	0	0
999	0	1	0	0	0	0	0	0	0	0	0	0	0	0	0	0	0	0	0	0	0	0	0	0	1	0	0	0	0	0	0	0	0
1000	0	0	0	0	0	0	0	0	0	0	0	0	0	0	0	0	0	0	0	0	0	0	0	0	0	0	0	0	0	0	0	0	0
1001	0	0	0	0	0	0	0	0	0	0	0	0	0	0	0	0	0	0	0	0	0	0	0	0	0	0	0	0	0	0	0	0	0
1002	0	0	0	0	0	0	0	0	0	0	0	0	0	0	0	0	0	0	0	0	0	1	0	0	0	0	0	0	0	0	0	0	0
1003	0	0	0	0	0	0	0	0	0	0	0	0	0	0	0	0	0	0	0	0	0	3	0	0	0	0	0	0	0	0	1	0	0
1004	0	0	0	0	0	0	0	0	0	0	0	0	0	0	0	0	0	1	0	0	0	1	0	0	0	0	0	0	0	0	0	0	0
1005	0	0	0	0	0	0	0	0	0	0	0	0	0	0	0	0	0	0	0	0	0	0	0	0	1	0	0	0	0	0	0	0	0
1006	0	0	0	0	0	0	1	2	0	0	1	0	0	0	0	0	0	0	0	0	0	8	0	0	1	0	0	0	0	0	0	0	0
1007	0	0	0	0	0	0	5	0	0	0	0	0	0	0	0	0	0	0	0	0	0	3	0	0	0	0	0	0	0	0	0	0	0
1008	0	3	0	0	0	0	0	0	0	0	0	0	0	0	0	0	0	0	0	0	0	2	0	0	0	0	0	0	0	0	0	0	0
1009	0	2	0	1	0	0	0	0	0	0	3	0	0	0	0	0	0	0	0	0	0	0	0	0	0	0	0	0	0	0	0	0	0
1010	0	2	0	1	0	0	0	0	0	0	0	0	0	0	0	0	0	0	0	0	0	0	0	0	0	0	0	0	2	0	0	0	0
1011	0	3	0	0	0	0	0	0	0	0	0	0	0	0	0	0	0	0	0	0	0	0	0	0	0	0	0	0	0	0	0	0	0
1012	0	3	0	0	0	0	0	0	0	0	0	0	0	0	0	0	0	0	0	0	0	0	0	0	0	0	0	0	0	0	2	0	0
1013	0	1	0	4	0	0	0	0	2	0	0	0	0	0	0	0	0	0	0	0	0	0	0	0	1	0	0	0	0	0	0	0	0
1014	0	2	0	0	0	0	0	0	0	0	0	0	0	0	0	0	0	0	0	0	0	0	0	0	0	0	0	0	0	0	0	0	0
1015	0	2	0	0	0	0	0	0	4	0	0	0	0	0	0	0	0	0	0	0	0	0	0	0	0	0	0	0	0	0	0	0	0
1016	0	0	0	5	0	0	0	0	3	0	0	0	0	0	0	0	0	0	0	0	0	0	0	0	0	0	0	0	0	0	0	0	0
1017	0	0	0	0	0	0	0	0	0	0	0	0	0	0	0	0	0	0	0	0	0	0	0	0	0	0	0	0	0	0	0	0	0
1018	0	0	0	0	0	0	0	0	2	0	0	0	0	0	0	0	0	0	0	0	0	0	0	0	0	0	0	0	0	0	0	2	0
1019	0	2	0	2	0	0	0	0	4	0	0	0	0	0	0	0	0	0	0	0	1	0	0	0	0	0	2	0	0	0	0	0	0
1020	0	2	0	0	0	0	0	0	2	0	0	0	0	0	0	0	0	0	0	0	3	0	0	0	0	0	6	0	0	0	0	3	0
1021	0	2	0	0	0	0	0	0	1	0	0	0	0	0	0	0	0	0	0	0	6	0	0	0	0	0	1	0	0	0	0	2	0
1022	0	3	0	11	0	0	0	0	2	0	0	0	0	0	0	0	0	0	0	0	0	0	0	0	1	0	2	0	0	0	0	0	0
1023	0	1	0	20	0	0	0	0	0	0	0	0	0	0	0	0	0	0	0	0	0	0	0	0	0	0	3	0	0	0	0	1	0
1024	0	4	0	1	0	0	0	0	2	0	0	0	0	0	0	0	0	0	0	0	8	0	0	0	0	0	2	0	0	0	0	0	0
1025	0	2	0	2	0	0	0	0	0	0	0	0	0	0	0	0	0	0	0	0	0	0	0	0	0	0	2	0	0	0	0	0	0
1026	0	2	0	0	0	0	0	0	0	0	0	0	0	0	0	0	0	0	0	0	0	0	0	0	1	0	4	0	0	0	0	0	0
1027	0	0	0	0	0	0	0	0	0	0	0	0	0	0	0	0	0	0	0	0	3	0	0	0	0	0	1	0	0	0	0	0	0
1028	0	0	0	0	0	0	0	0	1	0	0	0	0	0	0	0	0	0	0	0	1	0	0	0	0	0	3	0	0	0	0	0	0
1029	0	0	0	0	0	0	0	0	0	0	0	0	0	0	0	0	0	0	0	0	2	1	0	0	0	0	0	0	0	0	0	0	0
1030	0	0	0	6	0	0	0	0	2	0	0	0	0	0	0	0	0	0	0	0	1	2	0	0	1	0	0	0	0	0	0	0	0
1031	0	0	0	12	0	0	0	0	0	0	0	0	0	0	0	0	0	0	0	0	1	3	0	0	0	0	0	0	0	0	0	0	0
1032	0	0	0	6	0	0	0	0	0	0	0	0	0	0	0	0	0	0	0	0	10	5	0	0	0	0	1	0	0	0	0	0	0
1033	0	0	0	0	0	0	0	0	0	0	0	0	0	0	0	0	0	0	0	0	5	3	0	0	0	0	0	0	0	0	0	0	0
1034	0	0	0	0	0	0	0	0	0	0	0	0	0	0	0	0	0	0	0	0	3	4	0	0	0	0	0	0	0	0	0	0	0
1035	0	0	0	0	0	0	0	0	0	0	0	0	0	0	0	0	0	0	0	0	0	3	0	0	1	0	0	0	0	0	0	0	0
1036	0	0	0	0	0	0	0	0	0	0	0	0	0	0	0	0	0	0	0	0	0	2	0	0	0	1	0	0	0	0	0	0	0
1037	0	0	0	0	0	0	0	0	0	0	0	0	0	0	0	0	0	0	0	0	0	3	0	0	0	1	0	0	0	0	0	0	0
1038	0	0	0	0	0	0	0	0	0	0	0	0	0	0	0	0	0	0	0	0	0	5	0	0	0	0	0	0	0	0	0	0	0
1039	0	0	0	0	0	0	0	0	0	0	0	0	0	0	0	0	0	0	0	0	0	6	0	0	0	0	0	0	0	0	0	0	0
1040	0	0	0	0	0	0	0	0	0	0	0	0	0	0	0	0	0	0	0	0	0	5	0	0	0	0	0	0	0	0	0	0	0
1041	0	0	0	0	0	0	0	0	0	0	0	0	0	0	0	0	0	0	0	0	0	3	0	0	0	0	0	0	0	0	0	0	0
1042	0	0	0	0	0	0	0	0	0	0	0	0	0	0	0	0	0	0	0	0	0	2	0	0	0	0	0	0	0	0	0	0	0
1043	0	0	0	0	0	0	0	0	0	0	1	0	0	0	0	0	0	0	0	0	0	4	0	0	1	0	0	0	0	0	0	0	0
1044	0	0	3	0	0	0	0	0	0	0	0	0	0	0	0	0	0	0	1	0	0	4	0	0	0	2	0	0	0	0	0	0	0
1045	0	0	1	0	0	0	0	0	0	0	5	0	0	0	0	0	0	0	0	0	0	3	0	0	1	4	0	0	0	0	0	0	0
1046	0	1	0	0	0	0	4	0	0	0	0	2	0	0	0	0	0	0	0	0	0	4	0	0	0	0	0	0	0	0	0	0	0
1047	0	4	0	0	0	0	17	0	0	0	1	0	0	0	0	0	1	0	0	0	0	3	0	0	1	0	0	0	0	0	0	0	0
1048	0	5	1	0	0	0	6	0	1	0	3	0	0	0	0	0	0	0	0	0	0	4	0	0	0	0	0	3	0	0	0	0	0
1049	0	3	1	0	0	0	5	0	0	0	4	0	0	0	0	0	0	0	1	0	0	2	0	0	0	0	0	1	0	0	0	0	0
1050	0	2	10	0	0	0	2	0	1	0	0	0	0	0	0	0	0	0	0	0	0	4	0	0	0	2	0	0	0	0	0	0	0
1051	0	7	3	0	0	0	0	0	2	0	0	0	0	0	0	0	0	0	0	0	0	4	0	0	0	0	0	2	0	0	0	0	0
1052	0	7	0	0	0	0	0	0	2	0	0	0	0	0	0	0	0	0	0	0	0	4	0	0	0	0	0	5	1	0	0	0	0
1053	0	6	0	0	0	0	0	0	2	0	0	0	0	0	0	0	0	0	0	0	0	4	0	0	0	0	0	0	4	0	0	0	0
1054	0	2	2	20	0	0	0	0	1	0	0	0	0	0	0	0	2	0	0	0	0	4	0	0	1	0	0	3	4	0	0	0	0
1055	0	0	0	29	0	0	0	10	0	0	0	0	0	0	0	0	0	0	0	0	0	3	0	0	0	0	0	0	2	0	0	0	0
1056	0	3	1	27	0	0	0	5	1	0	0	0	0	0	0	0	0	0	0	0	0	4	0	0	0	0	0	3	0	0	0	0	0
1057	0	3	0	32	0	0	0	1	3	0	0	0	0	0	0	0	0	0	0	0	0	4	0	0	0	0	0	0	2	0	0	0	0
1058	0	3	1	41	0	0	0	0	0	0	0	0	0	0	0	0	0	0	0	0	0	3	0	0	0	0	0	1	5	0	0	0	0
1059	0	1	2	38	0	0	0	0	8	0	0	0	0	0	0	2	0	0	0	0	0	3	0	0	0	0	0	1	1	0	0	0	0
1060	0	0	2	49	0	0	0	0	3	0	1	0	0	0	0	0	0	0	0	0	0	4	0	0	0	0	0	4	3	0	0	0	0
1061	0	1	1	9	0	0	0	0	0	0	0	0	0	0	0	0	0	0	0	0	0	4	0	0	0	0	0	0	3	0	0	0	0
1062	0	4	0	1	0	0	0	0	0	0	0	0	0	0	0	1	0	0	0	0	0	2	0	4	0	0	0	0	0	0	0	0	0
1063	0	19	3	8	0	0	0	1	0	0	0	0	0	0	0	0	0	3	0	0	0	3	0	4	0	0	0	0	0	0	0	0	0
1064	0	3	3	8	0	0	0	5	0	0	0	0	0	0	0	0	0	0	0	0	0	4	0	0	0	0	0	0	0	0	0	0	0
1065	0	3	0	2	0	0	0	3	0	0	1	0	0	0	0	0	0	0	0	0	0	3	0	0	0	0	0	5	0	0	0	0	0
1066	0	2	0	0	0	0	0	0	0	0	0	0	0	0	0	0	0	0	0	0	0	4	0	1	0	0	0	3	0	0	0	0	0
1067	0	1	0	1	0	0	0	0	0	0	0	0	0	0	0	0	3	0	0	0	0	3	0	6	0	0	0	0	0	0	0	0	0
1068	0	0	0	2	0	0	0	0	0	0	0	0	0	0	0	0	0	0	0	0	0	4	0	8	0	0	0	1	0	0	0	0	0
1069	0	2	0	0	0	0	0	0	0	0	1	0	0	0	0	0	0	0	0	0	0	2	0	1	0	0	0	0	0	0	0	0	0
1070	0	0	0	0	0	0	0	0	0	0	0	0	0	0	0	0	0	0	0	0	0	4	0	2	0	0	0	1	0	0	0	0	0
1071	0	0	0	0	0	0	0	0	0	0	1	0	0	0	0	0	0	0	0	0	0	4	0	1	0	0	0	0	0	0	0	0	0
1072	0	2	0	0	0	0	0	0	0	0	0	0	0	0	0	0	0	4	0	0	0	1	0	5	0	0	0	0	0	0	0	9	0
1073	0	0	0	0	0	0	0	0	0	0	0	0	0	0	0	0	0	4	0	0	0	4	0	4	0	0	0	1	0	0	0	4	0
1074	0	0	0	1	0	0	0	0	0	0	0	0	0	0	0	0	10	4	0	0	0	3	0	4	0	0	0	0	0	0	0	0	0
1075	0	0	0	0	0	0	0	0	0	0	0	0	0	0	0	0	0	1	0	0	0	3	0	5	0	0	0	0	0	0	0	2	0
1076	0	0	0	0	0	0	0	0	0	0	4	0	0	0	0	0	0	2	0	0	0	4	0	0	0	0	0	0	0	0	0	0	0
1077	0	0	0	0	0	0	0	0	0	0	2	0	0	0	0	0	0	0	0	0	0	3	0	2	0	0	0	1	0	0	0	1	0
1078	0	0	0	0	0	0	0	0	0	0	0	0	0	0	0	0	1	0	0	0	0	4	0	4	0	0	1	0	0	0	0	0	1
1079	0	0	0	0	0	0	0	0	0	0	0	0	0	0	0	0	0	0	0	0	0	4	0	2	0	0	0	0	0	0	0	0	4
1080	0	3	0	0	0	0	0	0	0	0	0	0	0	0	0	0	0	0	0	0	0	5	0	1	0	0	4	0	0	0	0	0	0
1081	0	4	0	0	0	0	0	0	0	0	0	0	0	0	0	0	0	0	0	0	0	4	0	4	0	0	1	4	0	0	0	0	0
1082	0	1	0	0	0	0	0	0	0	0	1	0	0	0	0	0	0	0	0	0	2	2	0	3	0	0	7	1	0	0	0	0	0
1083	0	3	0	0	0	0	0	0	0	0	0	0	0	0	0	0	0	0	0	0	0	5	0	4	0	0	5	11	0	0	0	0	3
1084	0	1	0	0	0	0	0	0	0	0	0	0	0	0	0	0	0	0	0	0	0	3	0	3	0	0	3	1	0	0	0	0	0
1085	0	0	0	0	0	0	0	0	0	0	0	0	0	0	0	0	0	0	0	0	0	18	0	0	0	0	5	3	0	0	0	0	2
1086	0	0	0	0	0	0	0	0	0	0	1	0	0	0	0	0	0	0	0	0	0	9	0	0	0	0	0	2	0	0	0	0	1
1087	0	0	0	0	0	0	0	0	0	0	0	0	0	0	0	0	0	0	0	0	0	0	15	1	0	0	0	2	0	0	0	0	0
1088	0	0	0	0	0	0	1	0	0	0	0	0	0	0	0	0	0	0	0	0	0	3	3	0	0	0	0	0	0	0	0	0	0
1089	0	0	0	1	0	0	1	0	0	0	0	0	0	0	0	0	0	0	0	0	0	4	0	0	0	0	0	0	0	0	0	0	0
1090	0	0	0	5	0	0	0	0	0	0	1	1	0	0	0	0	0	0	0	0	0	3	0	0	0	2	0	0	0	0	0	0	0
1091	0	0	0	4	0	0	0	0	0	0	0	1	0	0	0	0	5	0	0	0	0	3	0	0	0	0	0	0	0	0	0	0	4
1092	0	0	0	9	0	0	0	0	0	0	0	0	0	0	0	0	0	0	0	0	0	3	0	0	0	2	0	5	0	0	0	0	0
1093	0	0	0	1	0	0	0	0	0	0	0	0	0	0	0	0	0	0	0	0	0	3	0	0	0	0	0	5	0	0	0	0	0
1094	0	0	0	3	0	0	0	0	0	0	13	0	0	0	0	0	0	0	0	0	0	3	0	0	0	0	0	1	0	0	0	0	0
1095	0	0	0	6	0	0	0	0	0	0	0	0	0	0	0	0	1	0	0	0	0	4	0	1	0	0	0	0	0	0	0	0	0
1096	0	2	0	2	0	0	0	0	0	0	0	1	0	0	0	0	0	0	0	0	0	2	0	8	0	0	0	3	0	0	0	0	0
1097	0	4	0	2	0	0	0	0	0	0	2	1	0	0	0	0	0	0	0	0	0	0	0	8	0	0	0	0	0	0	0	0	0
1098	0	1	0	0	0	0	0	0	0	0	2	0	0	0	0	0	0	0	0	0	0	0	0	2	0	0	0	0	0	0	0	0	0
1099	0	0	0	1	0	0	0	0	0	0	0	0	0	0	0	0	0	0	0	0	0	0	0	4	0	0	0	0	0	0	0	0	0
1100	0	0	0	2	0	0	0	1	0	0	0	1	0	0	0	0	0	0	0	0	0	0	0	1	0	0	2	0	0	0	0	0	0
1101	0	0	0	2	0	0	0	0	0	0	0	0	0	0	0	0	0	0	1	0	0	0	0	5	0	0	0	0	0	0	0	0	0
1102	0	0	0	3	0	0	0	0	3	0	0	0	0	0	0	0	0	0	0	0	0	0	0	4	0	0	0	0	0	0	0	0	0
1103	0	0	0	1	0	0	0	0	7	0	0	0	0	0	0	0	0	0	2	0	0	0	0	1	0	0	3	0	0	0	0	0	0
1104	0	0	0	2	0	0	0	2	2	0	0	0	0	0	0	0	0	0	0	0	0	0	0	9	0	0	3	0	0	0	0	0	0
1105	0	0	0	0	0	0	0	1	0	0	0	0	0	0	0	0	0	0	1	0	0	0	0	0	0	0	1	0	0	0	0	0	0
1106	0	0	0	0	0	0	0	0	0	0	0	0	0	0	0	0	0	0	0	0	0	0	0	2	0	0	0	0	0	0	0	0	0
1107	0	0	0	0	0	0	0	0	0	0	0	0	0	0	0	0	0	0	3	0	0	0	0	0	0	0	0	4	0	0	0	0	0
1108	0	0	0	7	0	0	0	0	0	0	0	0	0	0	0	0	0	0	0	0	0	0	0	0	0	0	0	1	0	0	0	0	0
1109	0	0	0	3	0	0	0	0	0	0	0	0	0	0	0	0	0	0	3	0	0	0	0	2	0	0	0	0	0	0	0	0	0
1110	0	0	0	3	0	0	0	0	0	0	0	0	0	0	0	0	0	0	4	0	0	0	0	0	4	0	0	9	0	0	0	0	0
1111	0	0	0	1	0	0	0	0	0	0	0	0	0	0	0	0	0	0	1	0	0	0	0	2	0	0	0	4	0	0	0	0	0
1112	0	0	0	3	0	0	0	0	0	0	0	0	0	0	0	0	0	0	4	1	0	0	0	5	3	0	0	5	0	0	0	3	0
1113	0	0	0	0	0	0	0	0	1	0	0	0	0	0	0	0	0	0	7	1	0	0	0	0	2	0	0	8	0	0	0	0	0
1114	0	0	0	0	0	0	0	0	2	0	0	0	0	0	0	0	0	0	1	2	0	0	0	0	1	0	1	5	2	0	0	0	0
1115	0	0	0	0	0	0	0	0	1	0	0	1	0	0	0	0	0	0	0	1	0	0	0	1	4	0	0	3	3	0	0	0	0
1116	0	1	0	2	0	0	0	0	3	0	0	0	0	0	0	0	2	0	5	3	0	0	0	1	2	0	0	2	2	0	0	2	0
1117	0	3	0	0	0	0	0	0	1	0	0	0	0	0	0	0	0	0	0	2	0	0	2	1	2	0	0	0	0	0	0	0	0
1118	0	0	0	4	0	0	0	0	2	0	0	0	0	0	0	0	0	0	0	3	0	0	0	1	2	0	1	1	2	0	0	0	0
1119	0	1	0	5	0	0	0	0	2	0	0	0	0	0	0	0	0	0	0	1	0	0	0	3	0	0	0	0	0	0	0	0	0
1120	0	2	0	2	0	0	0	0	1	2	0	0	0	0	0	0	0	0	0	0	0	0	0	0	4	0	0	0	0	0	0	0	0
1121	0	2	0	0	0	0	0	0	2	0	0	0	0	0	0	0	0	0	0	2	0	0	0	0	3	0	0	0	0	0	0	0	0
1122	0	1	0	4	0	0	0	0	2	0	0	0	0	0	0	0	0	0	0	3	0	0	0	0	1	0	0	3	2	0	0	0	0
1123	0	0	0	3	0	0	0	0	0	0	0	0	0	0	0	0	0	0	0	2	0	0	0	0	0	0	0	0	5	0	0	0	0
1124	0	1	0	0	0	0	0	0	0	0	0	0	0	0	0	0	0	0	0	2	0	0	0	0	0	0	0	0	8	0	0	0	11
1125	0	2	0	0	0	0	0	0	0	0	0	0	0	0	0	0	0	0	0	0	0	0	0	0	1	0	0	0	9	0	0	0	3
1126	0	3	0	0	0	0	0	0	0	0	0	0	0	0	0	0	0	0	0	0	0	0	0	0	1	0	0	0	22	0	0	0	4
1127	0	1	0	3	0	0	0	0	0	0	0	0	0	0	0	0	0	0	0	0	0	0	0	0	0	0	1	0	0	0	0	0	5
1128	0	2	0	3	0	0	0	0	0	0	0	1	0	0	2	0	0	0	0	0	0	0	0	0	0	0	0	1	0	0	0	0	3
1129	0	2	0	2	0	0	0	0	0	0	0	1	0	0	2	0	0	0	0	0	0	0	0	1	0	0	0	0	1	0	0	0	0
1130	0	1	0	2	0	0	0	0	0	0	0	0	0	0	2	0	0	0	0	0	0	0	0	0	0	0	0	1	8	0	0	0	0
1131	0	0	2	3	0	0	0	0	0	0	0	0	0	0	3	0	0	0	0	0	0	0	0	2	0	0	0	0	0	0	0	0	0
1132	0	0	1	3	0	0	0	0	0	0	0	0	0	0	10	0	0	0	0	0	0	0	0	0	0	0	0	0	0	0	0	0	1
1133	0	2	0	2	0	0	0	0	0	0	0	0	0	0	0	0	0	0	0	0	0	0	0	3	0	0	0	0	0	0	0	0	4
1134	0	0	0	1	0	0	0	0	0	0	0	0	0	0	0	0	0	0	0	0	0	0	0	0	0	1	13	0	0	0	0	0	0
1135	0	0	3	1	0	0	0	0	0	0	0	0	0	0	0	0	0	0	0	0	0	0	0	0	0	1	2	0	0	0	0	0	2
1136	0	2	2	2	0	0	0	0	0	0	0	0	0	0	0	0	0	0	0	0	0	0	0	0	0	2	4	10	0	0	0	0	4
1137	0	2	2	2	0	0	9	0	0	0	0	0	0	0	0	0	0	0	0	0	0	0	0	0	0	0	0	33	0	0	0	0	5
1138	0	1	2	2	0	0	2	0	0	0	0	3	0	0	0	0	0	0	0	0	0	0	0	0	0	0	3	0	0	0	0	0	4
1139	0	0	0	4	0	0	15	0	0	0	0	0	0	0	0	0	0	0	0	0	0	0	0	0	0	0	0	0	0	0	0	0	4
1140	0	2	0	3	0	0	7	0	0	0	0	1	0	0	0	0	0	0	0	0	0	0	0	0	0	0	0	0	0	0	0	0	1
1141	0	1	0	3	0	0	15	0	0	0	0	0	0	0	0	0	0	0	0	0	0	0	0	0	0	0	0	0	0	0	0	0	4
1142	0	4	1	1	0	0	0	0	0	0	0	3	0	0	0	0	0	0	0	0	0	0	0	0	0	0	0	1	0	0	0	0	3
1143	0	2	0	1	0	0	0	0	0	0	0	0	0	0	0	2	2	0	0	0	0	0	0	0	0	0	0	0	0	0	0	0	3
1144	0	0	0	1	0	0	9	0	0	0	0	0	0	0	3	0	3	0	0	0	0	0	0	0	0	0	0	4	0	0	0	0	2
1145	0	0	0	1	0	0	5	0	0	0	0	0	0	0	1	0	2	0	0	0	0	0	0	0	0	0	0	7	0	0	0	0	0
1146	0	0	0	3	0	0	3	0	0	0	0	1	0	0	0	0	0	0	0	0	0	0	0	0	0	0	0	10	0	0	0	0	3
1147	0	0	0	2	0	0	0	0	0	0	0	0	0	0	0	0	0	0	0	0	0	0	0	0	0	0	0	6	0	0	0	0	3
1148	0	1	0	12	0	0	0	0	0	0	0	0	0	0	0	0	0	0	0	0	0	0	0	0	0	2	0	2	0	0	0	0	0
1149	0	3	0	0	0	0	0	0	0	0	0	0	0	0	0	0	0	0	0	0	0	0	0	0	0	8	0	0	0	0	0	0	0
1150	0	0	0	0	0	2	0	0	0	0	0	0	0	0	0	0	0	0	0	0	0	0	0	0	0	0	0	2	0	0	0	0	0
1151	0	0	0	0	0	0	0	0	0	1	0	0	0	0	0	0	0	0	0	2	0	0	0	0	0	0	0	7	0	0	0	0	0
1152	0	0	0	0	0	0	0	0	0	0	0	1	0	0	0	0	0	0	0	3	0	0	0	0	0	0	0	0	0	0	0	0	0
1153	0	0	0	0	0	0	0	0	0	0	0	1	0	0	0	0	0	0	0	0	0	0	0	0	0	0	0	0	0	0	0	0	0
1154	0	3	0	0	0	9	0	0	0	0	0	6	0	0	0	0	0	0	0	3	0	0	0	0	0	0	0	0	0	0	0	0	0
1155	0	7	0	0	0	2	0	0	0	1	0	3	0	0	5	0	0	0	0	3	0	0	0	0	0	0	0	0	0	0	0	0	0
1156	0	0	0	0	0	1	0	0	0	7	0	11	0	0	2	0	0	0	0	0	0	0	0	0	0	0	0	0	0	0	0	0	0
1157	0	0	0	0	0	0	0	0	0	0	0	2	0	0	2	0	0	0	0	0	0	0	0	0	0	0	0	0	0	0	0	0	0
1158	0	0	0	0	0	0	0	0	0	0	0	8	0	0	6	0	0	0	0	0	0	0	0	0	1	0	0	0	0	0	0	0	0
1159	0	0	0	0	0	0	0	0	0	0	0	0	0	0	0	0	0	0	0	0	0	0	0	0	1	0	0	0	0	0	0	0	0
1160	0	0	0	0	0	0	0	0	0	0	0	1	0	0	0	0	0	0	0	0	0	0	0	0	4	0	0	0	0	0	0	0	0
1161	0	0	0	0	0	0	0	0	0	0	0	0	0	0	0	0	0	0	0	1	0	0	0	0	1	0	0	0	0	0	0	0	0
1162	0	0	0	0	0	0	0	0	0	0	0	0	0	0	0	0	0	0	0	0	0	0	0	0	0	0	0	0	0	0	0	0	0
1163	0	0	0	0	0	0	0	0	0	0	0	0	0	0	0	0	0	0	0	0	0	0	0	0	2	0	0	0	0	0	0	0	0
1164	0	0	0	0	0	0	0	0	0	0	0	0	0	0	0	0	0	0	0	0	0	0	0	0	1	0	0	0	0	0	0	0	0
1165	0	0	0	0	0	0	0	0	0	0	0	1	0	0	0	0	0	0	0	0	0	0	0	0	1	0	0	0	0	0	0	0	0
1166	0	0	0	3	0	0	0	0	0	0	0	0	0	0	0	0	0	0	0	1	0	0	0	0	1	3	0	0	0	0	2	0	0
1167	0	0	0	2	0	0	0	0	0	0	0	0	0	0	0	0	0	0	0	0	0	0	0	0	1	1	0	1	0	0	0	0	0
1168	0	0	0	2	0	0	0	0	0	0	0	0	0	0	0	0	0	0	0	0	0	0	0	3	1	20	0	0	0	0	0	0	0
1169	0	0	0	1	0	0	0	0	0	0	0	1	0	0	0	0	0	0	0	1	0	0	0	0	2	5	0	1	0	0	1	0	0
1170	0	0	0	3	0	0	0	0	0	0	0	0	0	0	0	0	0	0	0	0	0	0	0	0	0	0	0	0	0	0	2	0	0
1171	0	0	0	2	0	0	0	2	0	0	0	4	0	0	0	0	0	0	0	0	0	0	0	0	0	0	0	0	0	0	0	0	0
1172	0	0	0	2	0	0	0	4	0	0	0	0	0	0	0	0	0	0	0	0	0	0	0	0	0	1	0	1	0	0	2	0	0
1173	0	0	0	3	0	0	0	0	0	0	0	2	0	0	0	0	0	0	0	0	0	0	0	0	0	0	0	0	0	0	1	0	0
1174	0	0	0	2	0	0	0	1	0	0	0	0	0	0	0	0	1	0	0	0	0	0	0	0	0	0	0	0	3	0	0	0	0
1175	0	0	0	1	0	0	0	3	0	0	0	0	0	0	0	0	3	0	0	0	0	0	0	0	0	1	0	0	0	0	0	0	0
1176	0	0	0	0	0	0	0	2	0	0	0	0	0	0	0	0	0	0	0	0	0	0	0	0	0	0	0	8	0	0	0	0	0
1177	0	0	0	2	0	0	0	8	0	0	0	0	0	0	0	0	0	0	0	0	0	0	0	0	0	0	0	5	0	0	0	0	0
1178	0	0	0	1	0	0	0	5	0	0	0	0	0	0	0	0	1	0	0	0	0	0	0	0	0	0	0	3	0	0	0	0	0
1179	0	0	0	1	0	3	0	0	0	0	0	0	0	0	0	0	0	0	0	0	0	0	0	0	0	0	0	0	0	0	0	0	0
1180	0	0	0	3	0	0	0	0	0	0	0	0	0	0	0	0	3	0	0	0	0	0	0	0	0	0	2	5	0	0	0	0	0
1181	0	0	0	2	0	0	0	0	0	0	0	0	0	0	0	0	4	0	0	0	0	0	0	0	0	0	2	2	0	0	0	0	0
1182	0	0	0	2	0	0	0	0	0	0	0	0	0	0	0	0	4	0	0	0	0	0	0	0	0	0	6	1	0	0	0	0	0
1183	0	0	0	2	0	0	0	1	0	0	0	0	0	0	0	0	3	0	0	1	0	0	0	0	0	1	1	0	0	0	0	0	0
1184	0	0	0	1	0	0	0	0	0	0	0	0	0	0	4	0	3	0	0	0	0	0	0	0	0	2	0	0	0	0	0	0	0
1185	0	0	0	1	0	0	0	1	0	0	0	0	0	0	0	0	2	0	0	0	0	0	0	0	0	0	0	1	0	0	0	0	0
1186	0	0	0	3	0	0	0	0	0	0	0	0	0	0	0	0	1	0	0	0	0	0	0	0	0	3	0	0	0	0	0	0	0
1187	0	0	0	4	0	0	0	0	0	0	0	0	0	0	0	0	2	0	0	4	0	0	0	0	0	2	0	0	0	0	0	0	0
1188	0	0	0	3	0	0	0	0	0	0	0	0	0	0	0	0	0	0	0	2	0	0	0	0	0	0	0	1	0	0	0	0	0
1189	0	0	0	1	0	0	0	0	0	0	0	0	0	0	0	0	4	0	0	0	0	0	0	0	0	0	4	0	0	0	0	0	0
1190	0	0	0	0	0	0	0	0	0	0	0	0	0	0	0	0	4	0	0	0	0	0	0	0	0	0	0	0	0	0	0	0	0
1191	0	0	0	0	0	0	0	0	0	0	0	2	0	0	0	0	2	0	0	0	0	0	2	0	0	0	0	7	0	0	0	0	0
1192	0	0	0	0	0	0	0	0	0	0	0	0	0	0	0	0	0	0	0	0	0	0	4	0	1	0	0	7	0	0	0	0	0
1193	0	0	0	0	0	0	0	0	0	0	0	1	0	0	0	0	2	0	0	0	0	0	0	0	0	0	0	0	0	0	0	0	0
1194	0	0	0	0	0	0	0	0	0	0	0	2	0	0	0	0	3	0	0	0	0	0	0	0	0	0	0	0	0	0	0	0	0
1195	0	0	0	0	0	0	0	0	0	0	0	0	0	0	0	0	2	0	0	4	0	0	1	0	1	0	5	1	0	0	0	0	0
1196	0	0	0	0	0	0	0	0	0	5	0	0	0	0	0	0	4	0	0	0	0	0	1	0	0	2	4	0	0	0	0	0	0
1197	0	0	0	0	0	0	0	0	0	7	0	0	0	0	0	0	1	0	0	0	1	0	0	0	1	1	0	1	0	0	0	0	0
1198	0	0	0	0	0	0	0	0	0	0	0	0	0	0	0	0	3	0	0	36	0	0	0	0	3	7	4	0	0	0	0	0	0
1199	0	0	0	0	0	0	0	0	0	0	0	0	0	0	0	0	3	0	0	0	2	0	0	0	4	1	6	0	0	0	0	0	0
1200	0	0	0	0	0	0	0	0	0	0	0	0	0	0	0	0	3	0	0	5	1	0	0	0	0	0	6	0	5	0	0	0	0
1201	0	0	0	0	0	0	0	0	0	0	0	0	0	0	0	3	3	0	0	1	10	0	0	0	1	0	5	0	0	0	0	2	0
1202	0	0	0	0	0	0	0	0	0	0	0	0	0	0	0	0	3	0	0	3	5	0	0	0	2	0	3	0	2	0	0	3	0
1203	0	0	0	0	0	0	0	0	0	1	0	0	0	0	0	0	4	0	0	1	3	0	0	0	0	0	1	0	12	0	0	0	0
1204	0	0	0	0	0	0	0	0	0	0	0	0	0	0	0	1	3	0	0	0	1	0	0	0	1	5	1	0	0	0	0	4	0
1205	0	0	0	0	0	0	0	0	0	0	0	0	0	0	0	2	0	0	0	0	1	0	0	0	1	4	0	0	3	0	0	1	0
1206	0	0	0	0	0	0	0	0	0	0	0	0	0	0	0	1	0	0	0	0	0	0	0	0	0	0	0	1	3	0	0	0	0
1207	0	0	0	0	0	0	0	0	0	5	0	0	0	0	0	3	0	0	0	0	4	0	0	0	0	0	0	1	1	0	0	0	0
1208	0	0	0	0	0	0	0	0	0	0	0	0	0	0	0	2	0	0	0	0	1	0	0	0	0	0	0	0	2	0	0	0	0
1209	0	0	0	0	0	0	0	0	0	0	0	0	0	0	0	1	0	0	0	0	1	0	0	0	0	0	0	0	3	0	0	0	0
1210	0	0	0	0	0	0	0	0	0	0	0	0	0	0	0	2	0	0	0	0	10	0	0	0	0	0	1	0	0	0	0	0	0
1211	0	0	0	0	0	0	0	0	0	1	0	0	0	0	0	0	0	0	0	0	0	0	0	0	0	0	0	1	0	0	0	0	0
1212	0	0	0	0	0	0	0	0	0	2	0	0	0	0	0	2	0	0	0	0	0	0	0	0	0	2	0	0	0	0	0	0	0
1213	0	0	0	0	0	0	0	0	0	0	0	0	0	0	0	2	0	0	0	0	1	0	0	0	0	0	0	0	0	0	0	0	0
1214	0	0	0	0	0	0	0	0	0	0	0	0	0	0	0	1	0	0	0	0	0	0	0	0	0	0	0	0	0	0	0	0	0
1215	0	2	0	0	0	0	0	1	0	0	0	0	0	0	0	2	0	0	0	0	10	0	0	0	0	0	0	0	0	0	0	0	0
1216	0	0	0	0	0	0	0	0	0	2	0	0	0	0	0	3	0	0	0	0	1	0	0	0	0	0	0	1	0	0	0	0	0
1217	0	2	0	0	0	0	0	0	0	1	0	0	0	0	0	2	0	0	0	0	2	0	0	5	0	0	0	1	0	0	0	0	0
1218	0	0	0	0	0	2	0	0	0	1	0	0	0	0	0	3	0	0	0	0	3	0	0	0	0	0	0	0	0	0	2	0	0
1219	0	1	0	0	0	0	0	0	0	0	0	0	0	0	0	2	0	0	0	0	0	0	0	2	0	0	0	0	0	0	0	2	0
1220	0	2	0	0	0	0	0	0	0	0	0	0	0	0	0	0	0	0	0	0	0	0	0	0	0	0	0	1	0	0	0	21	0
1221	0	1	0	0	0	0	0	0	0	0	0	0	0	0	0	0	0	0	0	0	0	0	0	0	0	0	1	0	0	0	0	0	0
1222	0	2	0	0	0	0	0	0	0	1	0	0	0	0	0	0	0	0	0	0	0	0	0	2	0	0	0	0	0	0	1	0	0
1223	0	0	0	0	0	0	0	0	0	1	0	0	0	0	0	0	0	0	0	0	0	0	0	3	0	0	1	0	0	0	2	0	0
1224	0	1	0	0	0	0	0	0	0	0	0	0	0	0	0	0	0	0	0	0	0	0	0	3	0	0	0	0	0	0	0	0	0
1225	0	0	0	0	0	0	0	0	0	0	0	0	0	0	0	0	0	0	0	0	0	0	0	3	0	0	0	0	0	0	0	0	0
1226	0	0	0	0	0	0	0	5	0	0	0	0	0	0	0	0	0	0	0	0	0	0	0	1	0	0	1	0	0	0	0	0	0
1227	0	0	0	3	0	0	0	0	0	0	0	0	0	0	0	0	0	0	0	0	0	0	0	0	0	0	0	0	0	0	0	0	0
1228	0	0	0	1	0	0	0	0	0	0	0	0	0	0	0	3	0	0	0	0	0	0	0	0	0	0	0	0	0	0	0	0	0
1229	0	0	0	5	0	0	0	0	0	1	0	0	0	0	0	2	0	0	0	0	0	0	0	1	0	0	0	0	0	0	0	0	0
1230	0	0	0	6	0	0	0	0	0	0	0	0	0	0	0	0	0	0	0	0	0	0	2	0	2	0	0	0	0	0	0	0	0
1231	0	1	0	3	0	0	0	0	0	1	0	0	0	0	0	2	0	0	0	0	0	0	4	0	4	0	0	0	0	0	0	0	0
1232	0	5	0	2	0	0	0	0	0	0	0	0	0	0	0	2	0	0	0	0	5	0	3	1	4	0	0	0	3	0	0	0	0
1233	0	3	0	0	0	0	0	0	0	0	0	0	0	0	0	2	0	0	0	0	37	0	2	0	1	0	0	0	4	0	0	0	0
1234	0	0	0	4	0	0	0	0	0	1	0	0	0	0	0	3	0	1	0	0	6	0	0	2	2	0	0	0	4	0	0	0	0
1235	0	1	0	3	0	0	0	0	0	7	0	0	0	0	0	2	0	0	0	0	4	0	0	0	1	0	0	1	4	0	0	0	0
1236	0	2	0	3	0	0	0	0	0	0	0	0	0	0	0	1	0	0	0	0	10	0	0	10	1	0	0	0	5	0	0	0	0
1237	0	1	0	2	0	0	0	0	0	1	0	0	0	0	0	0	0	0	0	0	0	0	0	8	0	0	0	3	5	0	0	0	0
1238	0	3	0	0	0	0	0	0	0	0	0	0	0	0	0	2	0	0	0	0	0	0	0	2	0	0	0	3	4	0	0	0	0
1239	0	2	0	1	0	0	0	0	0	0	0	0	0	0	0	0	0	0	0	0	0	0	0	6	0	0	0	0	4	0	0	6	0
1240	0	1	0	3	4	0	0	0	0	0	0	0	0	0	0	1	0	0	0	0	5	0	0	3	1	0	2	0	4	0	0	0	0
1241	0	1	1	0	3	0	0	0	0	0	0	0	0	0	0	1	0	0	0	0	7	0	0	0	0	0	3	0	4	0	0	3	0
1242	0	3	2	3	1	0	0	0	0	0	0	0	0	0	0	3	0	0	0	0	0	0	0	4	1	0	0	0	4	0	0	1	0
1243	0	0	0	1	0	0	0	0	0	1	0	0	0	0	0	2	0	0	0	0	0	0	0	1	0	0	0	0	4	0	0	0	0
1244	0	0	0	1	0	0	0	2	0	0	0	0	0	0	0	1	0	0	0	0	0	0	0	0	0	0	1	0	1	0	0	2	0
1245	0	0	2	0	2	0	0	0	0	2	0	0	0	0	0	2	0	0	0	0	0	0	4	0	0	0	3	0	4	0	0	0	0
1246	0	0	3	0	0	0	0	0	0	6	0	0	0	0	0	0	0	0	0	4	0	0	0	0	0	0	2	0	1	0	0	0	0
1247	0	0	1	0	0	0	0	0	0	2	0	0	0	0	6	0	0	0	0	5	0	0	0	0	0	0	3	0	3	0	0	0	0
1248	0	0	6	1	0	0	0	2	0	3	0	0	0	0	0	3	0	0	0	4	0	0	0	0	0	0	5	0	4	0	0	0	2
1249	0	0	5	1	6	0	0	0	0	5	0	0	0	0	0	0	0	0	0	3	0	0	0	0	0	0	1	0	3	0	0	0	2
1250	0	0	2	2	1	0	0	0	0	0	0	0	0	0	0	2	0	0	0	1	0	0	0	0	0	0	0	0	4	0	0	0	0
1251	0	0	21	0	0	0	0	0	0	0	0	0	0	0	0	4	0	0	0	2	0	0	0	0	1	0	0	0	4	0	0	0	0
1252	0	0	2	0	1	0	0	0	0	0	0	0	0	0	0	0	0	0	0	0	0	0	0	0	0	0	0	0	4	0	0	0	0
1253	0	0	2	0	1	0	0	0	0	0	0	0	0	0	0	2	0	0	2	0	0	0	0	0	0	0	0	0	0	0	0	0	0
1254	0	0	0	0	1	0	0	0	0	0	0	0	0	0	0	2	0	0	0	0	0	0	0	0	0	4	0	0	0	0	0	0	4
1255	0	0	2	0	0	0	0	0	0	0	0	0	0	0	0	3	0	0	0	0	0	0	0	0	0	12	0	0	0	0	0	0	2
1256	0	0	4	0	0	0	0	0	0	0	0	0	0	0	0	1	0	0	0	0	0	0	0	0	0	2	0	0	0	0	0	0	0
1257	0	0	1	0	0	0	0	0	0	0	0	0	0	0	0	2	0	0	0	0	0	0	0	0	0	2	1	0	0	0	0	0	0
1258	0	0	1	0	0	0	0	0	0	0	0	0	0	0	0	0	0	0	0	0	0	0	0	0	0	0	3	0	2	0	0	0	0
1259	0	0	3	0	0	0	0	0	0	0	0	0	0	0	0	0	0	0	0	0	0	0	0	0	0	0	1	0	4	0	0	0	0
1260	0	0	2	0	2	0	0	0	0	0	0	0	0	0	0	0	0	0	0	0	0	0	0	0	0	1	1	0	0	0	0	0	0
1261	0	0	1	0	0	0	0	0	0	0	0	0	0	0	0	0	0	0	0	2	0	0	0	0	0	0	0	0	0	0	0	0	0
1262	0	0	3	0	0	0	0	0	0	0	0	1	0	0	0	0	0	6	0	3	0	0	0	0	0	0	0	0	0	0	0	0	0
1263	0	0	2	0	0	0	0	0	0	0	0	0	0	0	1	0	0	0	0	3	0	0	0	0	0	0	0	0	0	0	0	0	0
1264	0	0	2	0	0	0	0	0	0	0	0	0	0	0	1	1	0	0	0	8	0	0	0	0	0	0	0	7	0	0	0	0	0
1265	0	0	1	0	0	0	0	0	0	0	0	0	0	0	27	2	0	0	0	3	0	0	0	0	0	0	0	0	0	0	0	0	0
1266	0	0	2	0	0	0	0	1	0	0	0	0	0	0	13	2	0	0	0	1	0	0	0	0	0	1	0	0	0	0	0	0	0
1267	0	0	0	0	0	0	0	0	0	0	0	1	0	0	0	3	0	1	0	0	0	0	0	0	0	0	0	0	0	0	0	0	0
1268	0	0	1	0	0	0	0	0	0	0	0	0	0	0	0	3	0	3	0	0	0	0	0	0	0	0	0	0	0	0	0	0	0
1269	0	0	1	0	0	0	0	0	0	0	0	0	0	0	0	2	0	3	0	0	0	0	0	0	0	0	0	2	0	0	0	0	0
1270	0	0	2	0	0	0	0	0	0	0	0	0	0	0	0	2	0	1	0	1	0	0	0	0	0	0	0	2	0	0	0	0	0
1271	0	0	0	0	0	0	0	0	0	0	0	0	0	0	0	0	0	3	0	0	0	0	0	0	0	0	0	0	0	0	0	0	0
1272	0	0	0	0	0	0	0	1	0	0	0	0	0	0	0	1	0	19	0	0	0	0	0	0	0	0	0	0	0	0	0	0	1
1273	0	0	0	0	0	0	0	0	0	0	0	3	0	0	0	2	0	4	0	0	0	0	0	0	1	0	0	0	0	0	0	0	0
1274	0	0	0	0	0	0	0	0	0	0	0	1	0	0	0	3	0	2	0	1	6	0	0	0	0	0	0	0	0	0	0	0	0
1275	0	0	0	0	0	0	0	0	0	0	0	0	0	0	0	2	0	3	0	0	9	0	0	0	2	0	0	0	0	0	0	0	0
1276	0	0	0	0	0	0	0	0	0	0	0	0	0	0	0	2	0	0	0	0	2	0	0	0	1	0	0	0	0	0	0	0	0
1277	0	0	0	0	0	0	0	0	0	0	0	5	0	0	0	2	0	0	0	0	5	0	0	0	2	0	0	0	0	0	0	0	0
1278	0	0	0	0	0	0	0	0	0	0	0	3	0	0	4	2	0	0	1	0	1	0	0	0	0	0	0	0	0	0	0	0	0
1279	0	0	0	0	0	0	0	1	0	0	0	1	0	0	0	2	0	0	0	0	0	0	0	0	0	0	0	0	0	2	0	4	4
1280	0	0	0	0	0	0	0	0	0	0	0	0	0	0	0	1	0	0	0	0	0	0	0	0	0	1	0	0	0	0	0	0	4
1281	0	1	0	0	0	0	0	0	0	0	0	1	0	0	0	0	0	0	0	0	0	0	0	0	0	0	0	0	0	0	0	0	14
1282	0	1	0	0	0	0	0	0	0	0	0	0	0	0	0	0	0	0	0	1	0	0	0	0	3	0	0	0	0	2	0	0	1
1283	0	2	0	0	0	0	0	0	0	0	0	0	0	0	0	0	0	0	0	1	0	0	0	0	2	1	0	0	0	0	0	0	0
1284	0	2	0	0	0	0	0	0	0	0	0	1	0	0	0	1	0	0	0	0	0	0	0	0	1	5	0	0	0	0	0	0	0
1285	0	2	0	0	0	0	0	0	0	0	0	0	0	0	0	0	0	0	0	0	0	0	0	0	1	1	0	0	0	0	1	0	1
1286	0	0	0	0	0	0	0	0	0	0	0	0	0	0	0	1	0	1	0	0	0	0	0	0	0	1	0	0	0	4	1	0	0
1287	0	0	0	0	0	0	0	0	0	0	0	0	0	0	0	3	0	4	0	0	0	0	0	0	0	4	0	0	0	0	0	0	0
1288	0	0	0	0	0	0	0	0	0	0	0	0	0	0	0	2	0	2	0	0	0	0	0	0	0	0	0	0	0	0	0	0	0
1289	0	0	0	0	0	0	0	1	0	0	0	0	0	0	0	2	0	1	0	0	0	0	0	0	0	4	0	0	0	3	0	0	0
1290	0	0	0	0	0	0	0	0	0	0	0	2	0	0	0	1	0	2	0	0	0	0	0	0	0	2	0	0	0	2	0	0	0
1291	0	0	0	0	0	0	0	0	0	0	0	4	0	0	2	1	0	4	0	1	0	0	0	0	0	0	0	0	0	3	0	0	1
1292	0	0	0	0	0	0	0	0	0	0	0	6	0	0	2	0	0	6	0	0	0	0	0	0	0	0	0	0	0	3	0	0	0
1293	0	0	0	0	0	0	0	0	0	0	0	0	0	0	0	1	0	2	0	0	0	0	0	0	0	0	0	0	0	1	0	0	0
1294	0	0	0	0	0	0	0	0	0	0	0	0	0	0	15	3	0	4	0	0	0	0	0	0	0	0	0	0	0	3	0	0	0
1295	0	0	0	0	0	0	0	0	0	0	0	0	0	0	0	0	0	7	0	0	0	0	0	0	0	0	0	0	0	4	0	0	0
1296	0	0	0	0	0	0	0	0	0	0	0	0	0	0	0	0	0	39	0	0	0	0	0	0	0	0	0	0	0	2	0	0	0
1297	0	0	0	0	0	0	0	0	0	0	0	0	0	0	0	0	0	39	0	0	0	0	2	0	0	0	0	0	0	1	0	0	1
1298	0	0	0	0	0	0	0	0	0	0	0	0	0	0	0	0	0	63	0	0	0	0	0	0	0	0	1	0	0	2	0	0	0
1299	0	0	0	0	0	0	0	0	0	0	0	1	0	0	0	0	0	28	0	0	0	0	0	0	0	0	0	0	0	5	0	0	0
1300	0	0	0	0	0	0	0	2	0	0	0	0	0	0	0	0	0	16	0	0	0	0	0	0	0	0	0	0	0	2	0	0	0
1301	0	0	0	0	0	0	0	0	0	0	0	0	0	0	3	0	0	2	0	0	0	0	0	0	0	2	0	0	0	2	0	0	0
1302	0	0	0	0	0	0	0	3	0	0	0	0	0	0	2	0	0	0	0	0	0	0	0	0	0	0	0	0	0	2	0	0	1
1303	0	0	0	0	0	0	0	0	0	0	0	0	0	0	1	0	0	2	0	0	0	0	0	0	0	2	0	0	0	2	0	0	0
1304	0	0	0	0	0	0	0	2	0	0	0	0	0	0	4	0	0	4	0	0	0	0	0	0	0	0	0	0	0	3	0	0	0
1305	0	0	0	0	0	0	0	0	0	2	0	0	0	0	0	0	0	3	0	0	0	0	0	0	0	0	0	0	0	3	0	0	0
1306	0	0	0	0	0	0	0	0	0	0	0	0	0	0	0	0	0	3	0	0	0	0	0	0	0	6	0	0	0	1	0	0	0
1307	0	0	0	0	0	0	0	0	0	5	0	0	0	0	0	0	0	3	0	0	0	0	3	0	0	2	0	0	0	4	0	0	1
1308	0	1	0	0	0	0	0	0	0	10	0	0	0	0	0	0	0	0	0	0	0	0	1	0	0	1	0	0	0	2	0	0	0
1309	0	1	2	0	0	0	0	0	0	2	0	0	0	0	0	0	0	0	0	0	0	0	0	0	0	0	0	1	0	1	0	0	0
1310	0	2	1	0	0	0	0	0	0	0	0	6	0	0	0	0	0	0	0	0	0	0	0	0	0	0	0	0	0	2	0	0	0
1311	0	1	0	0	0	0	0	0	0	0	0	0	0	0	0	0	0	0	0	0	0	0	0	0	0	0	0	0	0	6	0	0	1
1312	0	2	1	0	0	3	0	0	0	0	0	0	0	0	0	0	0	0	0	0	0	0	0	0	0	0	0	0	0	11	0	0	0
1313	0	2	1	0	0	2	0	0	0	1	0	0	0	0	0	0	0	0	0	0	0	0	0	0	0	0	0	0	0	2	0	0	0
1314	0	3	0	1	0	1	0	0	0	1	0	0	0	0	0	0	0	0	0	0	0	0	0	0	0	0	0	0	0	0	0	0	0
1315	0	1	1	4	0	0	0	0	0	9	0	0	0	0	0	0	0	0	0	0	0	0	0	0	0	0	0	0	0	0	0	0	1
1316	0	2	2	0	0	0	0	0	0	3	0	0	0	0	0	0	0	0	0	0	0	0	0	0	0	0	0	0	0	0	0	0	0
1317	0	0	2	0	0	0	0	0	0	2	0	0	0	0	0	0	0	0	0	0	0	0	0	4	0	0	0	0	0	0	0	0	0
1318	0	1	3	0	0	1	0	0	0	0	0	0	0	0	0	0	0	0	0	0	0	0	0	3	0	0	0	0	0	0	0	0	1
1319	0	1	0	4	0	0	0	0	0	2	0	0	0	0	2	0	0	0	0	0	0	0	0	5	0	0	0	1	0	0	0	0	0
1320	0	1	0	0	0	0	0	0	0	0	0	0	0	0	1	0	0	0	0	0	0	1	0	1	0	0	0	0	0	0	0	0	0
1321	0	2	0	0	0	0	3	0	0	0	0	0	0	0	1	0	0	0	0	0	0	2	0	1	0	0	0	0	0	0	0	0	1
1322	0	2	0	0	0	0	2	0	0	2	0	0	0	0	1	0	0	0	0	0	0	3	0	2	0	0	0	0	0	0	0	0	0
1323	0	4	0	0	0	0	1	0	0	0	0	0	0	0	0	0	0	0	0	0	0	4	0	2	0	0	0	0	0	0	0	0	2
1324	0	1	0	5	0	0	0	0	0	0	0	0	0	0	0	0	0	0	0	0	0	1	0	3	0	0	0	0	0	0	0	0	0
1325	0	3	0	0	0	0	0	0	0	2	0	0	0	0	0	0	0	0	0	0	0	0	0	1	0	0	0	0	0	0	0	0	0
1326	0	2	0	0	0	0	0	0	0	0	0	0	0	0	0	0	0	0	0	0	0	0	0	0	0	0	0	0	0	0	0	0	17
1327	0	1	0	0	0	0	2	1	0	1	0	0	0	0	0	0	0	0	0	0	0	0	0	0	0	0	0	0	0	0	0	0	23
1328	0	2	1	0	0	0	0	1	0	3	0	0	0	0	0	0	0	0	0	0	0	0	0	7	0	0	0	0	0	0	0	0	14
1329	0	0	2	0	0	0	1	0	0	0	0	0	0	0	0	0	0	0	0	0	1	3	0	4	0	0	0	0	0	0	0	0	4
1330	0	0	2	5	0	0	0	0	0	0	0	0	0	0	0	0	0	0	0	0	1	5	0	5	0	0	0	0	0	0	0	0	8
1331	0	1	3	0	0	0	0	0	0	0	0	0	0	0	0	0	0	0	0	0	0	4	0	3	0	0	6	0	0	0	0	0	24
1332	0	2	1	0	0	0	0	0	0	0	0	0	0	0	0	0	0	0	0	0	0	4	0	5	0	0	0	0	0	0	0	0	12
1333	0	2	2	0	0	0	0	1	0	0	0	0	0	0	0	0	0	0	0	0	0	4	0	4	0	0	2	0	0	0	0	0	11
1334	0	2	1	0	0	0	0	4	0	0	0	0	0	0	0	0	0	0	0	0	0	4	0	2	0	0	3	0	0	0	0	0	0
1335	0	0	0	0	0	0	2	0	0	0	0	0	0	0	0	0	0	0	0	0	0	4	0	3	0	0	2	0	0	0	0	0	0
1336	0	0	0	0	0	0	0	0	0	0	0	0	1	0	0	0	0	1	0	0	0	4	0	5	0	0	0	7	0	0	0	0	0
1337	0	0	0	0	0	0	0	0	0	0	0	0	0	0	0	0	0	1	0	0	0	4	0	4	0	0	0	1	0	0	0	0	0
1338	0	0	1	0	0	0	3	0	0	0	0	0	0	0	3	0	0	0	0	0	0	4	0	5	0	0	0	0	0	0	0	0	0
1339	0	0	1	0	0	0	4	0	0	0	0	0	0	0	1	0	0	0	0	0	0	4	0	4	0	0	2	0	0	0	0	0	0
1340	0	0	1	0	0	0	4	0	0	0	0	0	0	0	1	0	0	0	0	0	0	5	0	2	0	0	0	0	0	0	0	0	0
1341	0	0	2	0	0	0	10	0	0	0	0	0	2	0	2	0	0	0	0	0	0	3	0	4	0	0	0	0	0	0	0	0	0
1342	0	0	2	0	0	0	7	0	0	0	0	0	0	0	0	0	0	0	0	0	0	3	0	2	0	0	4	0	0	0	0	0	7
1343	0	2	2	0	0	1	3	1	0	0	0	0	2	0	0	0	0	0	0	0	0	4	0	4	0	0	6	0	0	0	0	0	4
1344	0	3	0	0	0	2	0	0	0	0	0	3	0	0	0	0	0	0	0	0	0	3	0	6	2	0	0	0	0	0	0	0	2
1345	0	3	0	0	0	3	0	0	0	0	0	0	0	0	0	0	0	0	0	0	0	3	0	5	2	0	0	0	0	0	0	0	0
1346	0	1	0	0	0	4	5	7	0	0	0	0	0	0	0	0	0	6	0	0	0	3	0	3	3	0	0	0	0	0	0	0	0
1347	0	3	0	0	0	3	4	1	0	0	0	0	0	0	0	0	0	0	0	0	0	4	0	3	0	0	0	0	0	0	0	0	0
1348	0	0	0	0	0	3	2	0	0	0	0	0	0	0	0	0	0	0	0	0	0	4	0	2	6	0	0	0	0	0	0	0	0
1349	0	16	0	0	0	5	3	3	3	0	0	0	0	0	0	0	0	0	0	0	0	3	0	3	4	0	0	1	0	0	0	0	0
1350	0	6	0	0	0	2	2	4	0	0	0	0	0	0	0	0	0	0	0	0	0	2	0	4	2	0	0	0	0	0	0	0	0
1351	0	5	0	0	0	2	0	9	2	0	0	0	0	0	0	0	0	0	0	0	0	2	0	4	2	0	0	0	0	0	0	0	0
1352	0	0	0	0	0	8	0	2	0	0	0	0	0	0	0	0	0	0	0	0	0	4	0	4	4	0	0	1	0	0	0	0	0
1353	0	0	0	0	0	4	0	0	2	0	0	0	9	0	0	0	0	0	0	0	0	2	0	3	1	0	0	0	0	0	0	0	0
1354	0	1	2	0	0	3	0	0	2	0	0	0	1	0	0	0	0	0	0	0	0	3	0	3	2	0	0	5	0	0	0	0	0
1355	0	2	2	0	0	0	2	0	1	0	0	0	5	0	0	0	0	0	0	0	0	3	0	2	2	0	0	7	0	0	0	0	0
1356	0	0	0	0	0	0	4	0	2	0	0	0	1	0	0	0	0	0	0	0	0	4	0	3	1	0	0	2	0	0	0	0	0
1357	0	0	0	0	0	0	3	0	7	0	0	0	0	0	0	0	0	0	0	0	0	0	0	4	2	0	0	0	0	0	0	0	0
1358	0	0	2	0	0	0	14	0	3	0	0	0	0	0	0	0	0	0	0	0	0	3	0	2	2	0	0	3	0	0	0	0	0
1359	0	1	3	0	0	0	11	0	5	0	0	0	2	0	0	0	0	0	0	0	0	4	0	1	1	0	0	2	0	0	0	0	0
1360	0	0	2	0	0	0	5	0	2	0	0	0	1	0	2	0	0	0	0	0	0	3	0	1	4	0	0	4	0	0	0	0	0
1361	0	0	1	0	0	0	17	0	4	0	0	0	0	0	3	0	0	0	0	0	0	4	0	0	3	0	0	2	0	0	0	0	0
1362	0	0	0	0	0	0	2	0	4	0	0	0	0	0	0	0	0	0	0	0	0	6	0	0	0	0	0	1	0	0	0	0	0
1363	0	1	0	0	0	0	0	0	4	0	0	0	0	0	0	0	0	0	0	0	0	8	0	0	0	0	0	0	0	0	0	0	0
1364	0	0	0	0	0	0	0	0	2	0	0	0	1	0	0	0	0	0	0	0	0	0	0	0	0	0	0	0	0	0	0	0	0
1365	0	0	0	0	0	0	3	0	4	0	0	0	1	0	0	0	0	0	0	0	0	0	0	0	0	15	0	0	0	0	0	0	0
1366	0	0	1	0	0	0	5	0	3	0	0	0	3	0	0	0	0	0	0	0	0	0	0	0	0	2	0	0	0	0	0	0	0
1367	0	0	2	0	0	0	5	0	3	0	0	0	1	0	0	0	0	0	0	0	0	0	0	0	0	0	0	0	0	0	0	0	0
1368	0	0	10	0	0	0	4	0	2	0	0	0	2	0	0	0	0	0	0	0	0	0	0	0	0	0	0	0	0	0	0	0	0
1369	0	3	0	0	4	0	0	0	3	0	0	0	1	0	0	0	0	0	0	0	0	0	0	0	0	0	0	0	0	0	0	0	0
1370	0	0	0	0	0	0	0	0	4	0	0	0	4	0	0	0	0	0	0	0	0	0	0	0	0	0	0	0	0	0	0	0	0
1371	0	3	0	0	0	0	0	0	2	0	0	0	0	0	0	0	0	0	0	0	0	0	0	0	0	0	0	0	0	0	0	0	0
1372	0	3	0	0	0	0	0	0	2	0	0	0	0	0	0	0	0	0	0	0	0	0	0	0	0	0	0	0	0	0	0	0	0
1373	0	1	0	0	2	0	0	0	4	0	0	0	0	0	0	0	0	0	0	0	0	0	0	0	0	0	0	4	0	0	0	0	0
1374	0	1	0	0	0	0	0	0	1	0	0	0	0	0	0	0	0	0	0	0	0	0	0	0	0	0	0	2	0	0	0	0	0
1375	0	2	0	0	2	0	1	0	4	0	0	0	0	0	0	0	0	0	0	0	0	0	0	0	0	2	0	1	0	0	0	0	0
1376	0	1	0	0	3	0	7	0	3	0	0	0	0	0	0	0	0	0	0	0	0	0	0	0	0	0	0	5	0	0	0	0	0
1377	0	0	0	0	0	0	2	0	1	0	0	0	0	0	0	0	0	5	0	0	0	0	0	0	0	0	0	2	0	0	0	0	0
1378	0	1	0	0	1	0	0	0	2	0	0	0	0	0	0	0	0	1	0	0	0	0	0	0	0	0	0	4	0	0	0	0	0
1379	0	1	0	0	0	0	0	0	4	0	0	0	0	0	0	0	0	6	0	0	0	0	0	0	0	0	0	11	0	0	0	0	0
1380	0	1	0	0	0	0	0	0	3	0	0	0	0	2	0	0	1	3	0	0	0	0	0	0	0	0	0	3	0	0	0	0	0
1381	0	1	2	5	6	0	0	0	5	0	0	0	0	2	0	0	2	13	0	0	0	0	0	0	0	0	0	3	0	0	0	0	0
1382	0	0	8	6	0	0	0	0	2	0	0	0	1	4	0	0	4	4	0	0	0	0	0	0	0	0	0	3	0	0	0	0	0
1383	0	0	1	0	1	0	0	0	2	0	0	0	0	4	0	0	2	5	0	0	0	0	0	0	0	0	0	3	0	0	0	0	0
1384	0	0	2	2	0	0	0	0	2	0	0	0	0	5	0	0	3	3	0	0	0	0	0	0	0	0	0	1	0	0	0	0	2
1385	0	0	1	2	0	0	0	0	0	0	0	0	0	4	0	0	4	3	0	0	1	0	0	0	0	0	0	0	0	0	0	0	1
1386	0	2	0	2	0	0	0	0	0	0	0	0	0	5	0	0	4	4	0	0	1	0	0	0	0	0	0	2	0	0	0	0	0
1387	0	1	0	5	0	0	0	0	2	0	0	0	0	5	0	0	0	2	0	0	0	0	0	0	0	0	0	4	0	0	0	0	0
1388	0	2	0	4	0	0	0	0	4	0	0	0	0	6	0	0	4	1	3	0	0	0	0	0	0	0	0	4	0	0	0	0	2
1389	0	1	0	1	0	0	0	0	2	0	0	0	0	5	0	0	3	3	0	0	0	0	0	0	0	0	0	3	0	0	0	0	1
1390	0	1	0	4	0	0	0	0	2	0	0	0	0	2	0	0	1	2	0	0	0	0	0	0	0	0	0	2	0	0	0	0	4
1391	0	1	0	11	0	0	0	0	3	0	0	0	0	4	0	0	2	3	0	0	0	0	0	0	0	0	0	2	0	0	0	0	10
1392	0	3	0	0	0	0	0	0	1	0	0	0	0	4	0	0	2	2	0	0	0	0	0	0	0	0	0	2	0	0	0	0	3
1393	0	1	4	2	0	0	0	0	2	0	0	0	0	2	0	0	3	3	0	0	0	0	0	0	0	0	0	1	0	0	0	0	3
1394	0	1	2	2	0	0	0	0	3	1	0	0	0	4	0	0	1	3	1	0	0	0	0	0	0	0	0	1	0	0	0	0	4
1395	0	3	0	2	0	0	0	0	2	9	0	0	0	4	0	0	1	4	2	0	0	0	0	0	0	0	0	4	0	0	0	0	3
1396	0	5	0	2	0	0	0	0	1	31	0	0	0	4	0	0	0	3	8	0	0	0	0	0	0	0	0	1	0	0	0	0	5
1397	0	2	0	0	0	0	0	0	1	1	0	0	0	4	0	0	1	0	4	0	0	0	0	0	0	0	0	1	0	0	0	0	3
1398	0	3	0	2	0	0	0	0	3	0	0	0	0	2	0	0	3	6	6	0	0	0	0	0	0	0	0	2	0	0	0	0	5
1399	0	0	0	1	0	0	0	0	2	0	1	0	0	4	0	0	2	0	6	0	0	0	0	0	0	0	0	3	0	0	0	0	2
1400	0	0	0	5	0	0	0	0	2	0	1	0	0	6	0	0	3	3	3	1	0	0	0	0	0	0	0	2	0	0	0	0	2
1401	0	0	0	1	0	0	0	0	0	0	1	0	0	3	0	0	1	3	2	7	0	0	0	0	0	0	0	0	0	0	0	0	2
1402	0	0	0	0	0	0	0	0	0	0	0	0	0	5	0	0	2	1	5	6	0	1	0	0	0	0	0	0	0	0	0	0	0
1403	0	0	0	2	0	0	0	0	2	0	0	0	0	2	0	0	1	1	4	4	0	4	0	0	0	0	0	0	0	0	3	0	0
1404	0	4	0	4	0	0	0	0	1	0	0	0	0	5	0	0	1	3	2	6	0	4	0	0	0	0	0	0	0	0	3	0	0
1405	0	3	0	4	0	0	0	0	14	0	0	0	0	1	0	0	0	1	5	4	0	3	0	0	0	0	0	0	0	0	0	1	0
1406	0	2	0	2	0	0	0	0	2	6	2	0	0	5	0	0	0	16	4	4	0	3	0	0	0	0	0	0	0	0	0	5	0
1407	0	1	2	0	0	0	0	0	1	0	1	0	0	2	0	0	0	3	1	3	0	2	0	0	0	0	0	0	0	0	0	10	0
1408	0	6	2	3	0	0	0	0	1	0	2	0	0	3	0	0	2	4	6	3	0	2	0	0	0	0	0	0	0	0	0	0	0
1409	0	3	1	2	0	0	0	0	2	0	3	0	0	3	0	2	3	4	7	4	0	3	0	0	0	0	0	0	0	0	0	0	0
1410	0	2	0	3	0	0	0	0	2	0	14	0	0	3	0	2	3	1	1	3	0	2	0	0	0	1	0	0	0	0	0	5	0
1411	0	1	4	3	0	0	0	0	3	0	0	0	0	5	0	2	2	4	1	4	0	5	0	0	0	0	0	0	0	0	0	27	0
1412	0	0	2	4	0	2	2	0	1	4	0	0	0	3	0	2	2	2	5	2	0	2	0	0	0	0	0	0	0	0	0	0	0
1413	0	1	0	3	0	1	2	0	2	1	0	0	0	3	0	3	2	3	3	2	0	4	0	0	0	0	0	0	0	0	0	0	0
1414	0	0	0	0	0	3	7	0	2	10	0	0	0	1	0	2	2	4	3	2	4	3	0	0	0	0	0	0	0	0	0	0	0
1415	0	0	0	0	0	2	3	0	0	2	0	0	0	3	0	2	3	5	2	4	3	1	0	0	0	0	0	0	3	0	0	0	0
1416	0	1	0	0	0	1	1	0	0	0	0	0	5	5	0	1	3	4	5	2	4	2	0	0	0	0	0	0	0	0	0	0	0
1417	0	1	0	0	0	2	2	0	2	2	0	0	2	3	0	2	0	2	0	4	5	4	0	0	0	0	0	0	0	0	0	0	0
1418	0	2	0	0	0	3	3	0	8	5	0	0	0	2	0	1	2	1	5	2	5	3	2	0	0	0	0	0	0	0	0	0	0
1419	0	2	0	0	0	0	3	0	2	4	0	0	0	0	0	0	2	2	2	2	5	2	1	0	0	0	0	0	0	0	0	0	0
1420	0	0	1	0	0	3	0	0	2	2	0	0	0	3	0	3	0	4	3	5	6	2	4	0	0	0	1	0	0	0	0	0	0
1421	0	0	5	1	0	1	0	0	1	0	0	0	0	2	0	2	3	3	3	1	5	0	3	0	0	0	4	0	0	0	0	0	0
1422	0	0	1	3	0	2	0	0	2	0	0	0	0	3	0	3	1	4	2	4	4	4	5	0	0	0	4	0	0	0	0	0	0
1423	0	0	0	1	0	1	0	0	2	0	0	0	0	3	0	5	2	3	4	2	4	2	4	0	0	0	3	1	0	0	0	0	0
1424	0	0	0	4	0	4	3	0	1	3	0	0	0	4	0	0	3	2	2	3	2	4	4	0	0	0	1	4	0	0	0	0	0
1425	0	0	0	3	0	1	4	0	1	2	0	0	0	3	0	2	3	3	5	3	5	4	4	0	0	0	3	2	0	0	0	0	0
1426	0	0	0	2	0	2	1	0	1	14	0	0	0	2	0	2	3	2	3	4	6	0	4	0	0	0	3	3	0	0	0	0	0
1427	0	0	2	4	0	1	0	0	0	3	2	0	0	4	0	2	2	1	1	2	4	0	2	0	0	0	3	5	0	0	0	0	0
1428	0	2	3	2	0	2	0	0	3	1	1	0	0	3	0	2	3	2	0	2	4	1	3	0	0	0	3	3	0	0	0	0	0
1429	0	3	1	1	1	3	0	0	2	1	3	0	0	2	0	2	1	3	0	4	4	4	3	0	0	0	2	2	0	0	0	0	0
1430	0	2	0	3	1	5	0	0	3	0	0	0	0	3	0	0	2	2	0	2	3	3	4	0	0	0	3	2	0	0	0	0	0
1431	0	1	0	5	2	2	0	0	2	5	0	0	3	4	0	2	2	2	0	3	6	3	5	0	0	1	1	4	0	0	0	0	0
1432	0	3	1	1	2	2	3	0	3	1	0	0	0	3	0	0	3	4	0	3	3	4	4	0	0	0	2	14	0	0	0	0	0
1433	0	2	2	0	1	3	8	0	1	3	0	0	0	3	0	2	1	5	2	3	4	2	2	0	0	0	3	3	0	0	0	0	0
1434	0	3	1	2	0	2	10	1	1	1	0	0	2	33	0	3	0	2	13	3	2	4	4	0	0	0	2	1	0	0	0	5	0
1435	0	2	2	4	1	2	4	2	2	2	0	0	0	3	0	2	2	2	2	3	3	3	4	0	0	0	4	12	0	0	0	0	0
1436	0	2	1	0	0	1	3	3	1	4	0	0	0	4	0	1	2	3	5	3	2	4	2	0	0	2	4	2	0	0	0	0	0
1437	0	1	4	3	0	2	4	0	1	0	0	0	0	2	0	1	3	3	1	2	4	3	3	0	0	0	3	3	0	0	0	0	0
1438	0	2	1	2	0	6	1	0	3	1	0	0	0	3	0	1	3	0	1	3	3	4	3	0	0	0	2	3	5	0	0	1	0
1439	0	1	5	3	0	6	2	0	1	3	0	0	0	5	0	2	2	1	1	3	3	2	2	0	0	0	3	0	5	0	0	3	0
1440	0	1	1	1	0	3	1	1	0	2	0	0	0	4	2	2	2	3	9	4	3	1	2	0	0	0	3	0	1	0	0	6	0

## Sheet: parameter calculator
	rest identifier																																	first sleep bin
mins from the start	ch1	ch2	ch3	ch4	ch5	ch6	ch7	ch8	ch9	ch10	ch11	ch12	ch13	ch14	ch15	ch16	ch17	ch18	ch19	ch20	ch21	ch22	ch23	ch24	ch25	ch26	ch27	ch28	ch29	ch30	ch31	ch32		ch1	ch2	ch3	ch4	ch5	ch6	ch7	ch8	ch9	ch10	ch11	ch12	ch13	ch14	ch15	ch16
0	0	0	0	0	0	0	0	0	0	0	0	0	0	0	0	0	0	0	0	0	0	0	0	0	0	0	0	0	0	0	0	0		x	x	x	x	x	x	x	x	x	x	x	x	x	x	x	x
1	0	1	0	1	0	1	1	0	0	0	0	0	0	0	0	0	0	1	0	0	1	0	0	0	1	0	1	0	0	0	0	0		x	x	x	x	x	x	x	x	x	x	x	x	x	x	x	x
2	0	1	1	0	0	1	0	0	0	0	0	0	0	0	0	0	0	0	0	0	0	0	0	0	1	0	0	0	0	0	0	1		x	x	x	x	x	x	x	x	x	x	x	x	x	x	x	x
3	1	0	1	0	0	0	0	0	0	0	0	0	0	0	0	0	0	0	0	0	0	0	0	0	0	0	0	0	0	0	0	0		x	x	x	x	x	x	x	x	x	x	x	x	x	x	x	x
4	1	0	1	0	0	0	0	0	0	0	0	0	0	0	1	0	0	0	0	0	0	0	0	0	0	0	0	0	0	0	0	0		x	x	x	x	x	x	x	x	x	x	x	x	x	x	x	x
5	1	1	1	0	0	0	0	0	0	0	0	0	0	0	0	0	0	0	0	0	0	0	0	0	0	0	0	0	0	0	0	0		x	x	x	x	x	x	x	x	x	x	x	x	x	x	x	x
6	1	1	0	0	0	0	0	0	0	0	0	0	0	0	0	0	0	0	0	0	0	0	0	0	0	0	0	0	0	0	0	0		x	x	x	x	x	x	x	x	x	x	x	x	x	x	x	x
7	0	1	0	0	0	0	0	0	0	0	0	0	0	0	0	0	0	0	0	0	0	0	0	0	0	0	0	0	0	0	0	0		x	x	x	x	x	x	x	x	x	x	x	x	x	x	x	x
8	1	0	1	0	0	0	0	0	0	0	0	0	0	0	0	0	0	0	0	0	0	0	0	0	0	0	0	0	0	0	1	0		x	x	x	x	x	x	x	x	x	x	x	x	x	x	x	x
9	0	0	1	0	0	0	0	0	0	1	0	0	0	0	0	0	0	0	0	0	0	0	0	0	0	0	0	0	0	0	0	0		x	x	x	x	x	x	x	x	x	x	x	x	x	x	x	x
10	1	0	1	0	0	0	0	0	0	0	0	0	0	0	0	0	0	0	0	0	0	0	0	0	0	0	1	0	0	0	0	0		x	x	x	x	x	x	x	x	x	x	x	x	x	x	x	x
11	1	1	0	0	0	0	1	0	0	0	0	0	0	0	1	0	0	0	0	0	0	0	0	0	0	0	1	0	0	0	0	0		x	x	x	x	x	x	x	x	x	x	x	x	x	x	x	x
12	1	1	1	0	0	0	0	0	0	0	0	0	0	0	1	0	0	0	0	0	0	0	0	0	0	0	0	0	0	0	0	0		x	x	x	x	x	x	x	x	x	x	x	x	x	x	x	x
13	1	0	1	0	0	0	0	0	0	0	0	0	0	0	0	0	0	0	0	0	0	0	0	0	0	0	1	1	0	0	0	0		x	x	x	x	x	x	x	x	x	x	x	x	x	x	x	x
14	0	0	1	0	0	0	0	0	0	0	0	0	0	0	0	0	0	0	0	0	0	0	0	0	0	0	0	0	0	0	0	0		x	x	x	x	x	x	x	x	x	x	x	x	x	x	x	x
15	1	1	1	1	0	0	0	0	0	0	0	0	0	0	1	0	1	0	0	0	0	0	0	0	0	0	0	0	0	0	0	0		x	x	x	x	x	x	x	x	x	x	x	x	x	x	x	x
16	0	1	0	0	0	0	0	0	0	0	0	0	0	0	0	0	0	0	0	0	0	0	0	0	0	0	0	0	0	0	0	0		x	x	x	x	x	x	x	x	x	x	x	x	x	x	x	x
17	0	1	0	0	0	0	0	0	0	0	0	0	0	0	0	0	0	0	0	0	0	0	0	0	0	0	0	0	0	0	0	0		x	x	x	x	x	x	x	x	x	x	x	x	x	x	x	x
18	1	0	0	0	0	0	0	0	0	0	0	0	0	0	0	0	0	0	0	0	0	0	0	0	0	0	0	0	0	0	0	0		x	x	x	x	x	x	x	x	x	x	x	x	x	x	x	x
19	0	0	0	0	0	0	0	0	0	0	0	0	0	0	0	0	0	0	0	0	0	0	0	0	0	0	0	0	0	0	0	0		x	x	x	x	x	x	x	x	x	x	x	x	x	x	x	x
20	0	0	0	0	0	0	0	0	0	0	0	0	0	0	0	0	0	0	0	0	0	0	0	0	0	0	0	0	0	0	0	0		x	x	x	x	x	x	x	x	x	x	x	x	x	x	x	x
21	0	0	0	0	0	0	0	0	0	0	0	0	0	0	0	0	0	0	0	0	0	0	0	0	0	0	0	0	0	0	0	0		x	x	x	x	x	x	x	x	x	x	x	x	x	x	x	x
22	0	0	0	0	0	0	0	0	0	0	0	0	0	0	0	0	0	0	0	0	0	0	1	0	0	0	0	0	0	0	0	0		x	x	x	x	x	x	x	x	x	x	x	x	x	x	x	x
23	0	0	0	0	0	0	0	0	0	0	0	0	0	0	0	0	0	0	0	0	0	0	0	0	0	0	0	0	0	0	0	0		x	x	x	x	x	x	x	x	x	x	x	x	x	x	x	x
24	0	0	0	0	0	0	0	0	0	0	0	0	0	1	0	0	0	0	0	0	0	0	0	0	0	0	0	0	0	0	0	0		x	x	x	x	x	x	x	x	x	x	x	x	x	x	x	x
25	0	0	0	0	0	0	0	0	0	0	0	0	0	1	0	0	0	0	0	0	0	0	0	0	0	0	0	0	0	0	0	0		x	x	x	x	x	x	x	x	x	x	x	x	x	x	x	x
26	0	1	0	0	0	0	0	0	0	0	0	0	0	1	1	0	0	0	0	0	0	0	0	0	0	0	0	0	0	0	0	0		x	26	x	x	x	x	x	x	x	x	x	x	x	x	x	x
27	0	1	0	0	0	0	0	0	0	1	0	0	0	0	0	0	0	0	0	0	0	0	0	0	0	0	0	0	0	0	0	0		x	x	x	x	x	x	x	x	x	x	x	x	x	x	x	x
28	0	1	0	0	0	0	0	0	0	0	1	0	0	1	1	0	0	0	0	0	0	0	0	1	0	0	0	0	0	0	0	0		x	x	x	x	x	x	x	x	x	x	x	x	x	x	x	x
29	0	1	0	0	0	0	0	0	0	0	0	0	0	0	1	0	0	0	0	1	0	0	0	0	0	0	0	0	0	0	0	0		x	x	x	x	x	x	x	x	x	x	x	x	x	x	x	x
30	0	1	1	0	0	0	0	0	0	0	0	0	0	0	0	0	0	0	0	0	0	0	0	0	0	0	0	0	0	0	0	0		x	x	x	x	x	x	x	x	x	x	x	x	x	x	x	x
31	1	0	0	0	0	0	0	0	0	0	0	0	0	0	0	0	0	0	0	0	0	0	0	0	0	0	0	0	0	0	0	0		x	x	x	x	x	x	x	x	x	x	x	x	x	x	x	x
32	0	0	0	0	0	0	0	0	0	0	0	0	0	1	0	0	0	0	0	0	0	0	0	0	0	0	1	0	0	0	0	0		x	x	x	x	x	x	x	x	x	x	x	x	x	x	x	x
33	0	0	0	0	0	0	0	0	0	0	0	0	0	1	0	0	0	0	0	0	0	0	0	0	0	0	1	0	0	0	0	0		x	x	x	x	x	x	x	x	x	x	x	x	x	x	x	x
34	0	0	0	0	0	0	0	0	0	0	0	0	0	1	0	0	0	0	0	0	0	0	0	0	0	0	0	0	0	0	0	0		x	x	x	x	x	x	x	x	x	x	x	x	x	x	x	x
35	0	0	0	0	0	0	0	0	0	0	0	0	0	1	0	0	0	0	0	0	0	0	0	0	0	0	0	0	0	0	0	0		x	x	x	x	x	x	x	x	x	x	x	x	x	x	x	x
36	1	0	0	0	0	0	0	0	0	0	0	0	0	0	1	0	0	0	0	0	0	0	0	0	0	0	0	0	0	0	0	0		x	x	x	x	x	x	x	x	x	x	x	x	x	x	x	x
37	1	0	1	0	0	0	0	0	0	0	0	0	0	0	0	0	0	0	0	0	0	0	0	0	0	0	0	0	0	0	0	0		x	x	x	x	x	x	x	x	x	x	x	x	x	x	x	x
38	0	0	0	0	0	0	0	0	0	0	0	0	0	0	0	0	0	0	0	0	0	0	0	0	0	0	0	0	0	0	0	0		x	x	x	x	x	x	x	x	x	x	x	x	x	x	x	x
39	0	0	0	0	0	0	0	0	0	0	0	0	0	0	0	0	0	0	0	0	0	0	0	0	0	0	1	0	0	0	1	0		x	x	x	x	x	x	x	x	x	x	x	x	x	x	x	x
40	0	0	0	0	0	0	0	0	0	0	0	0	0	1	0	0	0	0	0	0	0	0	0	0	0	0	0	0	0	0	0	0		x	x	x	x	x	x	x	x	x	x	x	x	x	40	x	x
41	1	0	0	0	0	0	0	0	0	0	0	1	0	1	0	0	0	0	0	0	0	0	0	0	0	0	0	0	0	0	0	0		x	x	x	x	x	x	x	x	x	x	x	x	x	41	x	x
42	0	0	1	0	0	0	0	0	1	1	0	1	0	1	0	0	1	0	0	0	0	0	0	0	0	0	0	0	0	0	0	0		x	x	x	x	x	x	x	x	x	42	x	x	x	42	x	x
43	0	1	0	0	0	0	0	0	1	1	0	1	0	1	0	0	0	0	0	0	0	0	0	1	0	0	0	0	0	0	0	0		x	x	x	x	x	x	x	x	x	x	x	x	x	x	x	x
44	1	1	1	0	0	0	0	0	1	1	0	0	0	1	0	0	0	0	0	0	0	0	0	0	0	0	0	0	0	0	0	1		x	x	x	x	x	x	x	x	x	x	x	x	x	x	x	x
45	0	1	1	1	0	0	0	1	0	1	0	0	0	1	0	0	0	0	0	0	0	0	0	0	0	0	0	0	0	0	0	0		x	x	x	x	x	x	x	x	x	x	x	x	x	x	x	x
46	1	1	0	1	0	0	0	0	0	1	0	0	0	1	1	0	0	1	0	0	0	0	0	0	0	0	0	0	0	0	1	0		x	x	x	x	x	x	x	x	x	x	x	x	x	x	x	x
47	0	0	0	0	0	0	0	0	0	0	0	0	0	0	0	0	0	0	0	0	0	0	0	0	0	0	1	0	0	0	0	0		x	x	x	x	x	x	x	x	x	x	x	x	x	x	x	x
48	0	0	0	0	0	0	0	0	0	0	0	0	0	0	0	0	0	0	0	0	0	0	0	0	0	0	0	0	0	0	0	0		x	x	x	x	x	x	x	x	x	x	x	x	x	x	x	x
49	0	0	0	0	0	0	0	0	0	0	0	0	0	1	0	0	0	0	0	0	0	0	0	0	0	0	0	0	0	0	0	0		x	x	x	x	x	x	x	x	x	x	x	x	x	x	x	x
50	0	0	0	0	0	0	0	0	0	0	0	0	0	0	0	0	0	0	0	0	0	0	0	0	0	0	0	0	0	0	0	0		x	x	x	x	x	x	x	x	x	x	x	x	x	x	x	x
51	0	0	0	0	0	0	0	0	0	0	0	0	0	0	0	0	0	0	0	0	0	0	0	0	0	0	0	0	0	0	0	0		x	x	x	x	x	x	x	x	x	x	x	x	x	x	x	x
52	0	0	1	0	0	0	0	0	0	0	0	0	0	1	1	0	0	0	0	0	0	0	0	0	0	0	1	0	0	0	0	0		x	x	x	x	x	x	x	x	x	x	x	x	x	x	x	x
53	0	0	0	0	0	0	0	0	0	0	0	0	0	1	0	0	0	0	0	0	0	0	0	0	0	0	0	0	0	0	0	0		x	x	x	x	x	x	x	x	x	x	x	x	x	x	x	x
54	0	0	0	1	0	0	0	1	0	0	0	0	0	1	1	0	0	0	0	0	0	0	0	0	0	0	0	0	0	0	0	0		x	x	x	54	x	x	x	x	x	x	x	x	x	x	x	x
55	0	0	0	1	0	0	0	0	0	1	0	0	1	0	1	0	0	0	0	0	0	0	0	0	0	0	0	0	0	0	0	0		x	x	x	55	x	x	x	x	x	55	x	x	x	x	x	x
56	0	0	1	1	0	0	0	0	1	1	0	0	1	0	0	0	0	0	0	0	0	0	0	0	0	0	0	0	0	0	0	0		x	x	x	56	x	x	x	x	56	56	x	x	x	x	x	x
57	0	0	0	1	0	0	0	0	1	1	0	1	0	0	0	0	0	0	0	0	0	0	0	1	0	0	0	0	0	0	0	0		x	x	x	57	x	x	x	x	57	57	x	x	x	x	x	x
58	0	0	1	1	0	0	1	0	1	1	0	1	0	1	0	0	0	0	0	0	0	0	1	0	0	0	0	0	0	0	0	0		x	x	x	58	x	x	58	x	58	58	x	x	x	58	x	x
59	0	1	0	1	0	0	1	1	1	1	0	1	0	1	1	0	0	0	0	0	0	0	0	1	0	0	0	0	0	0	1	0		x	x	x	59	x	x	59	x	59	59	x	x	x	59	x	x
60	0	0	1	1	0	0	1	0	1	1	0	0	0	1	1	0	0	0	0	0	0	0	0	0	0	0	1	0	0	0	0	0		x	x	x	60	x	x	60	x	60	60	x	x	x	60	x	x
61	0	0	1	1	1	0	1	0	1	1	0	0	0	1	1	0	0	1	0	0	0	0	0	0	0	1	0	0	0	0	1	0		x	x	x	61	x	x	61	x	61	61	x	x	x	x	x	x
62	1	0	0	1	1	0	1	0	1	1	1	0	0	1	0	0	0	0	0	0	0	0	0	0	0	0	0	0	0	0	0	0		x	x	x	62	x	x	62	x	62	62	x	x	x	x	x	x
63	0	1	0	1	1	0	1	1	1	1	0	0	0	1	0	0	0	0	0	0	0	0	0	0	0	0	0	0	0	0	0	0		x	x	x	63	x	x	63	x	63	63	x	x	x	x	x	x
64	0	0	0	1	0	0	1	1	1	1	0	0	0	1	0	0	0	0	0	0	0	0	0	1	0	0	0	0	0	0	0	0		x	x	x	64	x	x	64	x	64	64	x	x	x	x	x	x
65	0	0	0	1	0	0	1	0	1	1	0	0	0	0	0	0	0	0	0	0	0	0	0	0	0	0	0	0	0	0	0	0		x	x	x	65	x	x	65	x	x	x	x	x	x	x	x	x
66	1	0	0	1	0	0	1	1	1	1	0	0	0	0	0	0	0	0	0	0	0	0	0	0	0	0	0	0	0	0	0	0		x	x	x	66	x	x	66	x	x	x	x	x	x	x	x	x
67	0	0	0	1	0	0	1	0	1	1	0	1	0	0	0	0	0	0	0	0	0	0	0	0	0	0	0	0	0	0	0	0		x	x	x	67	x	x	67	x	x	x	x	x	x	x	x	x
68	1	0	0	1	0	0	1	0	1	1	0	0	0	1	0	0	0	0	0	0	0	0	0	0	0	0	0	0	0	0	0	0		x	x	x	68	x	x	x	x	x	x	x	x	x	x	x	x
69	0	0	1	1	0	0	1	0	0	0	0	0	0	0	0	0	0	0	0	0	0	0	0	0	0	0	0	0	0	0	0	0		x	x	x	69	x	x	x	x	x	x	x	x	x	x	x	x
70	0	0	0	1	0	0	1	0	0	1	0	0	0	1	0	0	0	0	0	0	0	0	0	0	0	0	0	0	0	0	0	0		x	x	x	70	x	x	x	x	x	70	x	x	x	70	x	x
71	0	0	0	1	0	0	1	0	0	1	0	0	0	1	0	0	0	0	0	0	0	0	0	0	0	0	0	0	0	0	0	0		x	x	x	71	x	x	x	x	x	71	x	x	x	71	x	x
72	1	0	0	1	0	0	0	0	0	1	0	1	0	1	0	0	0	0	0	0	0	0	0	0	0	0	0	0	0	0	0	0		x	x	x	72	x	x	x	x	x	72	x	72	x	72	x	x
73	0	0	1	1	1	0	0	0	1	1	0	1	0	1	1	0	0	0	0	0	0	0	0	0	0	0	0	0	0	0	0	1		x	x	x	73	x	x	x	x	73	73	x	73	x	73	x	x
74	0	1	1	1	1	0	0	0	1	1	0	1	0	1	1	1	1	0	0	0	0	0	0	0	0	0	0	0	0	0	0	0		x	x	x	74	x	x	x	x	74	74	x	74	x	74	x	x
75	0	1	1	1	1	0	0	0	1	1	0	1	0	1	0	0	0	0	0	0	0	0	0	0	0	0	0	0	0	0	0	0		x	x	x	75	x	x	x	x	75	75	x	75	x	75	x	x
76	0	0	0	1	0	0	0	0	1	1	0	1	0	1	0	0	0	0	0	0	0	0	0	0	0	0	0	0	0	0	0	0		x	x	x	76	x	x	x	x	76	76	x	x	x	76	x	x
77	1	1	0	1	0	0	0	0	1	1	0	1	1	1	1	0	0	0	0	0	0	0	0	1	0	0	0	0	0	0	0	0		x	x	x	77	x	x	x	x	x	77	x	x	x	77	x	x
78	0	0	0	1	0	1	0	0	1	1	0	1	0	1	0	0	0	1	0	0	0	0	0	1	0	0	0	0	0	0	0	0		x	x	x	78	x	x	x	x	x	78	x	x	x	78	x	x
79	1	1	0	1	0	0	0	1	1	1	0	1	0	1	0	0	1	0	0	0	0	0	0	0	0	0	0	0	0	0	0	0		x	x	x	79	x	x	x	x	x	79	x	x	x	79	x	x
80	0	0	1	1	0	0	0	0	1	1	0	0	0	1	0	1	0	0	0	0	0	0	0	0	0	0	0	0	0	0	0	0		x	x	x	80	x	x	x	x	x	80	x	x	x	80	x	x
81	0	0	0	1	1	0	1	0	0	1	0	0	0	1	0	1	0	0	0	0	0	0	0	0	0	0	0	0	0	0	0	0		x	x	x	x	x	x	81	x	x	81	x	x	x	81	x	x
82	0	0	0	1	0	0	1	0	0	1	0	0	0	1	0	1	0	0	0	0	0	0	0	0	0	0	0	0	0	0	0	0		x	x	x	x	x	x	x	x	x	82	x	x	x	82	x	x
83	0	1	1	1	0	0	1	0	0	1	0	0	0	1	0	1	0	0	0	0	0	0	0	0	0	0	0	0	0	0	0	0		x	x	x	x	x	x	x	x	x	83	x	x	x	83	x	x
84	0	1	1	1	0	0	1	0	0	1	0	1	0	1	0	0	1	0	0	0	0	0	0	0	0	0	0	0	0	0	0	0		x	x	x	x	x	x	x	x	x	84	x	x	x	x	x	x
85	0	0	1	0	0	0	1	0	0	1	0	1	0	1	0	0	0	0	0	0	0	0	0	0	0	0	0	0	0	0	0	0		x	x	x	x	x	x	x	x	x	85	x	x	x	x	x	x
86	0	0	0	1	0	0	0	0	0	1	1	0	0	1	0	0	0	0	0	0	0	0	0	0	0	0	0	0	0	0	0	0		x	x	x	x	x	x	x	x	x	86	x	x	x	x	x	x
87	1	0	0	1	1	0	0	0	1	1	0	1	0	1	0	1	0	1	0	0	0	0	0	0	0	0	0	0	1	0	0	0		x	x	x	x	87	x	x	x	x	87	x	87	x	x	x	87
88	1	0	0	0	1	0	0	0	0	1	0	1	1	0	0	1	0	0	0	0	0	0	0	0	0	0	0	0	0	0	0	0		x	x	x	x	88	x	x	x	x	88	x	88	x	x	x	88
89	1	0	0	0	1	0	0	0	0	1	0	1	1	1	0	1	0	0	0	0	0	0	0	0	0	0	0	0	0	0	0	1		x	x	x	x	89	x	x	x	x	89	x	89	x	x	x	89
90	0	0	1	0	1	0	1	0	0	1	0	1	1	0	0	1	0	0	0	0	0	0	0	0	0	0	1	0	0	0	0	1		x	x	x	x	90	x	x	x	x	90	x	90	x	x	x	90
91	0	0	0	0	1	1	0	0	0	1	0	1	1	1	0	1	0	0	0	0	0	0	0	0	0	0	0	0	0	0	0	0		x	x	x	x	91	x	x	x	x	91	x	91	x	91	x	91
92	0	0	1	0	1	1	1	0	0	1	0	1	0	1	1	1	0	0	0	0	0	0	0	0	0	0	0	0	0	0	1	0		x	x	x	x	92	x	x	x	x	92	x	x	x	92	x	92
93	0	0	0	0	1	0	0	0	0	1	0	1	0	1	0	1	0	0	0	0	0	0	0	0	0	0	0	0	0	0	0	0		x	x	x	x	93	x	x	x	x	93	x	x	x	93	x	93
94	1	1	0	0	1	0	1	0	0	1	1	1	0	1	0	1	0	0	0	0	0	0	0	0	0	0	1	0	0	0	0	0		x	x	x	x	94	x	94	x	x	94	x	x	x	94	x	94
95	0	1	0	0	1	0	1	1	0	1	0	1	0	1	0	1	0	0	0	0	0	0	0	0	0	0	0	0	1	0	1	0		x	x	x	x	x	x	95	x	x	95	x	x	x	95	x	95
96	0	1	0	0	1	0	1	0	1	1	0	0	0	1	0	1	0	0	0	0	0	0	0	0	0	0	0	0	0	0	0	0		x	x	x	x	x	x	96	x	96	96	x	x	x	96	x	96
97	0	0	0	0	1	0	1	0	1	1	0	0	0	1	1	1	0	1	0	0	0	0	0	0	0	0	0	0	0	0	0	0		x	x	x	x	x	x	97	x	97	97	x	x	x	97	x	97
98	0	0	0	0	1	0	1	0	1	1	0	0	0	1	0	1	0	0	0	0	0	0	0	0	0	0	0	0	0	0	0	0		x	x	x	x	x	x	98	x	98	98	x	x	x	98	x	98
99	0	0	1	0	0	0	1	0	1	1	0	0	0	1	0	1	0	0	0	0	0	0	0	0	0	1	0	1	0	0	0	0		x	x	x	x	x	x	99	x	99	99	x	x	x	99	x	x
100	0	1	1	1	1	0	1	0	1	1	0	0	0	1	1	1	0	0	0	0	0	0	0	0	0	0	0	0	0	0	0	0		x	x	x	x	x	x	100	x	100	100	x	x	x	100	x	x
101	0	1	1	0	0	1	1	0	1	1	0	0	0	1	1	1	0	0	0	0	0	0	0	0	0	0	0	1	0	0	0	0		x	x	x	x	x	101	101	x	101	101	x	x	x	101	x	x
102	0	1	0	0	0	1	1	0	1	1	0	1	0	1	1	1	0	0	0	0	0	0	0	0	0	0	0	0	0	0	0	0		x	x	x	x	x	102	102	x	102	102	x	102	x	x	x	x
103	0	0	0	0	1	1	1	0	1	1	0	1	0	1	0	0	0	0	0	0	0	0	0	0	1	0	0	0	0	0	0	0		x	x	x	x	103	103	103	x	103	103	x	103	x	x	x	x
104	0	0	0	0	1	1	1	0	1	1	0	1	0	1	0	0	0	0	0	0	0	0	0	0	0	0	0	0	0	0	0	0		x	x	x	x	104	104	104	x	x	104	x	104	x	x	x	x
105	1	0	0	1	1	1	1	0	1	1	1	1	0	1	0	0	0	0	0	0	0	0	0	0	0	1	0	0	0	0	0	0		x	x	x	105	105	105	105	x	x	105	x	105	x	x	x	x
106	1	0	0	1	1	1	1	0	1	1	0	1	0	0	0	0	0	0	0	0	0	0	0	0	0	0	0	0	0	0	0	0		x	x	x	106	106	106	106	x	x	106	x	106	x	x	x	x
107	0	0	0	1	1	1	1	0	1	1	0	1	0	0	0	0	0	0	0	0	0	0	0	0	1	0	0	0	0	0	0	0		x	x	x	107	107	107	x	x	x	107	x	107	x	x	x	x
108	0	0	1	1	1	1	1	0	0	1	0	1	1	0	0	0	0	0	1	0	0	0	0	0	0	0	0	0	0	0	1	0		x	x	108	108	108	108	x	x	x	108	x	108	x	x	x	x
109	0	0	1	1	1	1	1	0	1	1	0	1	0	0	0	1	0	0	0	0	0	0	0	1	0	0	0	0	0	0	1	0		x	x	x	109	x	109	x	x	109	109	x	109	x	x	x	x
110	0	0	1	1	1	1	1	0	1	1	0	1	0	1	0	0	0	0	0	0	0	0	0	0	0	0	0	0	1	0	0	1		x	x	x	110	x	110	x	x	110	110	x	110	x	110	x	x
111	1	0	1	1	1	1	0	1	1	1	0	1	0	1	0	0	1	1	0	0	0	0	0	0	0	0	0	0	0	0	0	0		x	x	x	x	x	111	x	x	111	111	x	111	x	111	x	x
112	0	1	1	1	1	1	0	0	1	1	0	1	0	1	0	0	0	0	0	0	0	0	0	0	0	0	1	0	0	0	0	0		x	x	x	x	x	112	x	x	x	112	x	x	x	112	x	x
113	0	1	0	1	0	1	0	0	1	1	0	1	0	1	0	1	0	0	0	0	0	0	0	0	0	0	0	0	0	0	0	0		x	x	x	x	x	113	x	x	x	113	x	x	x	113	x	113
114	0	1	0	1	0	1	1	0	1	1	0	1	0	1	0	1	0	0	0	0	0	0	0	0	0	0	0	0	0	0	0	1		x	x	x	x	x	114	x	x	x	114	x	x	x	114	x	114
115	0	1	0	0	0	1	0	0	1	1	0	1	0	1	0	1	0	0	0	0	0	0	0	0	0	0	0	0	1	0	0	1		x	x	x	x	x	115	x	x	x	115	x	x	x	115	x	115
116	0	0	0	0	1	1	1	0	0	1	1	0	0	1	0	1	0	0	0	0	0	0	0	0	0	0	0	0	0	0	0	0		x	x	x	x	116	116	116	x	x	116	x	x	x	116	x	116
117	0	0	0	1	1	1	1	0	0	1	1	0	1	1	0	1	1	0	0	0	0	0	0	0	0	0	0	0	0	0	0	0		x	x	x	117	117	117	117	x	x	117	x	x	x	117	x	117
118	0	0	0	1	1	1	1	0	0	1	0	1	0	1	0	1	0	0	0	0	0	0	0	0	0	0	0	0	0	0	0	0		x	x	x	118	118	118	118	x	x	118	x	118	x	118	x	118
119	0	0	0	1	1	1	1	0	1	1	0	1	0	1	0	1	0	1	0	0	0	0	0	0	0	1	0	0	0	0	0	0		x	x	x	119	119	119	119	x	x	119	x	119	x	119	x	119
120	0	0	0	1	1	1	1	0	1	1	0	1	0	1	0	1	0	0	0	0	0	0	0	0	0	0	0	0	0	0	0	0		x	x	x	120	120	120	120	x	x	120	x	120	x	120	x	120
121	0	1	0	1	1	1	1	0	0	1	0	1	0	1	1	1	0	0	0	0	0	0	0	0	0	1	0	1	1	0	0	0		x	x	x	121	x	121	121	x	x	121	x	121	x	121	x	121
122	1	0	0	1	1	1	1	0	1	1	0	1	0	1	1	1	0	0	0	0	0	0	0	0	0	1	0	0	0	0	0	0		x	x	x	122	x	122	122	x	x	122	x	122	x	122	x	122
123	1	1	0	1	1	1	1	0	0	1	0	1	0	1	1	1	0	0	0	0	0	0	0	0	0	1	0	0	0	0	0	0		x	x	x	123	x	123	123	x	x	123	x	123	x	123	x	123
124	0	0	0	1	1	1	1	0	1	1	1	1	1	1	0	1	1	0	0	1	0	0	0	1	0	1	1	0	0	0	0	0		x	x	x	124	x	124	124	x	x	124	x	124	x	124	x	124
125	1	0	0	1	0	1	1	1	0	1	0	1	0	1	0	1	0	0	0	0	0	0	0	1	0	1	0	0	0	0	0	0		x	x	x	125	x	125	x	x	x	125	x	125	x	125	x	125
126	0	0	0	1	0	1	1	0	1	1	0	1	0	1	0	1	0	0	0	0	0	0	0	1	0	0	0	0	0	0	0	0		x	x	x	126	x	126	x	x	x	126	x	126	x	126	x	126
127	0	0	0	1	1	1	1	1	0	1	0	1	0	1	0	1	0	0	0	0	0	0	0	0	0	0	1	0	0	0	0	1		x	x	x	127	127	127	x	x	x	127	x	127	x	127	x	127
128	0	1	0	1	1	1	1	0	1	1	0	1	0	1	0	1	0	1	0	0	0	0	0	0	0	1	0	0	0	0	0	0		x	x	x	128	128	128	x	x	x	128	x	128	x	128	x	128
129	0	0	0	1	1	1	0	1	0	1	0	1	0	1	0	1	0	0	0	0	0	0	0	0	0	0	0	0	0	0	0	0		x	x	x	129	129	129	x	x	x	129	x	129	x	129	x	129
130	0	0	1	1	1	1	0	0	1	1	0	1	1	1	1	1	1	0	0	0	0	0	0	0	0	0	0	0	0	0	0	0		x	x	x	130	130	130	x	x	x	130	x	130	x	130	x	130
131	0	0	0	1	1	1	1	0	1	1	0	1	0	1	0	1	1	0	0	0	0	0	0	0	0	0	0	0	0	0	0	0		x	x	x	131	131	131	131	x	x	131	x	131	x	131	x	131
132	0	0	0	1	1	1	1	0	1	1	0	1	0	1	0	1	1	0	0	0	0	0	0	0	0	0	0	0	0	0	0	0		x	x	x	132	132	132	132	x	x	132	x	132	x	132	x	132
133	0	0	0	1	1	1	1	0	0	1	0	1	0	1	0	1	0	0	0	0	0	0	0	0	0	0	1	0	0	0	0	0		x	x	x	133	133	133	133	x	x	133	x	133	x	133	x	133
134	1	1	0	1	1	1	1	0	1	1	0	1	0	1	0	1	1	0	0	0	0	0	0	0	0	0	0	0	0	0	0	0		x	134	x	134	134	134	134	x	x	134	x	134	x	134	x	134
135	1	1	0	1	1	1	1	0	0	1	0	1	1	1	0	1	1	0	0	0	0	0	0	0	0	0	0	0	0	0	0	0		x	135	x	135	135	135	135	x	x	135	x	135	x	135	x	135
136	1	1	0	1	1	1	1	0	1	1	0	1	1	1	1	1	1	0	0	0	0	0	0	0	0	0	0	0	0	0	0	0		x	x	x	136	136	136	136	x	136	136	x	136	x	136	x	136
137	1	1	0	1	1	1	1	0	1	1	0	1	1	1	0	1	1	0	0	0	0	0	0	1	1	0	0	1	1	0	0	0		x	x	x	137	137	137	137	x	137	137	x	137	x	137	x	137
138	0	1	1	1	1	1	1	0	1	1	1	1	0	1	1	1	1	0	0	0	0	0	0	1	0	0	0	1	0	0	0	1		x	x	x	138	138	138	138	x	138	138	x	138	x	138	x	138
139	1	1	0	1	1	1	1	0	1	1	0	1	1	1	0	1	1	0	0	0	0	0	0	1	0	1	0	1	0	0	0	0		x	x	x	139	139	139	139	x	139	139	x	139	139	139	x	139
140	1	0	0	1	1	1	1	0	1	1	1	1	1	1	0	1	1	0	1	0	0	0	1	1	0	0	0	0	0	0	0	0		x	x	x	140	140	140	140	x	140	140	x	140	140	140	x	140
141	1	0	0	1	1	1	1	1	1	1	1	1	1	1	0	1	1	1	0	0	0	0	0	0	0	0	0	0	0	0	0	0		x	x	x	141	141	141	141	x	141	141	x	141	141	141	x	141
142	0	1	0	1	1	1	1	0	1	1	1	1	1	1	0	1	1	0	0	0	0	0	0	1	0	0	0	0	1	0	0	0		x	x	x	142	142	142	142	x	142	142	x	142	142	142	x	142
143	0	1	0	1	1	1	1	0	1	1	0	1	1	1	0	1	0	0	0	0	0	0	0	0	0	0	0	1	0	0	0	0		x	x	x	143	143	143	143	x	143	143	x	143	143	143	x	143
144	1	1	0	1	1	1	1	0	1	1	0	1	1	1	0	1	0	0	0	0	0	0	0	0	0	0	0	0	0	0	0	1		x	x	x	144	144	144	144	x	144	144	x	144	144	144	x	144
145	0	1	0	1	1	1	1	0	1	1	0	1	1	1	0	1	0	0	0	0	0	0	0	0	0	0	0	0	1	0	0	0		x	x	x	145	x	145	145	x	145	145	x	145	145	145	x	145
146	1	0	0	1	1	1	1	0	1	1	0	1	1	1	1	1	1	0	0	0	0	0	0	0	0	1	0	0	0	0	0	0		x	x	x	146	x	146	146	x	146	146	x	146	146	146	x	146
147	1	0	0	1	1	1	1	0	1	1	1	1	1	1	1	1	0	0	0	0	0	0	0	0	0	0	0	0	0	0	0	0		x	x	x	147	x	147	147	x	147	147	147	147	147	147	x	147
148	1	0	0	1	1	1	1	0	1	1	1	1	1	1	0	1	0	0	0	0	0	0	0	0	0	0	0	0	0	0	0	1		x	x	x	148	x	148	148	x	148	148	x	148	148	148	x	148
149	0	0	0	1	0	1	1	0	1	1	1	1	1	1	0	1	1	1	0	0	0	0	0	0	0	0	0	0	0	0	0	0		x	x	x	149	x	149	149	x	149	149	x	149	149	149	x	149
150	1	0	0	1	1	1	1	0	1	1	1	1	1	1	0	1	1	0	0	0	0	0	1	0	0	0	0	0	0	0	0	0		x	x	x	150	150	150	150	x	150	150	x	150	150	150	x	150
151	0	0	0	1	1	1	1	1	1	1	1	1	1	1	0	1	1	0	0	0	0	0	0	0	0	0	0	0	1	0	0	0		x	x	x	151	151	151	151	x	151	151	x	151	151	151	x	151
152	0	0	0	1	1	1	1	0	1	1	0	1	1	1	0	1	1	0	0	0	0	0	0	0	0	0	1	0	0	0	0	0		x	x	x	152	152	152	152	x	152	152	x	152	152	152	x	152
153	0	0	0	1	1	1	1	0	1	1	0	1	1	1	1	1	1	0	0	1	0	0	0	0	0	0	0	0	0	0	0	1		x	x	x	153	153	153	153	x	153	153	x	153	153	153	x	153
154	1	1	0	1	1	1	1	0	1	1	0	1	1	1	1	1	1	0	0	1	0	0	0	1	0	0	0	0	0	0	0	0		x	x	x	154	154	154	154	x	x	154	x	154	154	154	x	154
155	1	1	0	1	1	1	1	0	1	1	0	1	1	1	1	1	1	0	0	1	0	0	0	1	0	0	0	0	0	0	0	1		x	x	x	155	155	155	155	x	x	155	x	155	x	155	x	155
156	0	0	0	1	1	1	1	0	1	1	0	1	1	1	0	1	1	0	0	0	0	1	0	0	0	0	0	0	1	0	0	0		x	x	x	156	156	156	156	x	x	156	x	156	x	156	x	156
157	0	1	0	1	1	1	1	0	1	1	0	1	1	1	0	1	1	1	0	0	0	0	0	1	0	1	0	0	0	0	0	0		x	x	x	157	157	157	157	x	x	157	x	157	x	157	x	157
158	0	1	0	1	1	1	1	0	0	1	0	1	1	1	0	1	1	0	0	0	0	0	0	0	0	1	0	1	0	0	0	0		x	x	x	158	158	158	158	x	x	158	x	158	x	158	x	158
159	1	1	0	1	1	1	1	0	0	1	0	1	0	1	0	1	1	0	0	0	0	0	0	1	0	0	0	0	1	0	0	0		x	x	x	159	159	159	159	x	x	159	x	159	x	159	x	159
160	1	1	0	1	1	1	1	0	1	1	1	1	1	1	0	1	1	0	0	0	0	0	0	0	0	0	1	1	0	0	0	0		x	x	x	160	160	160	160	x	160	160	x	160	x	160	x	160
161	1	0	0	1	1	1	1	0	1	1	1	1	1	1	0	1	1	1	0	0	0	0	0	0	0	0	0	1	0	0	0	1		x	x	x	161	161	161	161	x	161	161	x	161	x	161	x	161
162	0	0	1	1	1	1	1	0	1	1	0	1	0	1	0	1	1	1	0	1	0	0	0	0	0	0	0	0	0	0	0	1		x	x	x	162	162	162	162	x	162	162	x	162	x	162	x	162
163	0	0	0	1	1	1	1	0	1	1	0	1	1	1	0	1	1	0	0	0	0	0	0	0	0	0	0	0	1	0	0	0		x	x	x	163	163	163	163	x	163	163	x	163	163	163	x	163
164	1	0	0	1	1	1	1	0	1	1	0	1	1	1	0	1	1	0	0	0	0	0	0	1	0	0	0	0	0	0	0	0		x	x	x	164	164	164	164	x	164	164	x	164	164	164	x	164
165	0	1	0	1	1	1	1	0	1	1	0	1	1	1	0	1	1	0	0	0	1	0	0	0	0	0	0	0	1	0	0	0		x	x	x	165	165	165	165	x	165	165	x	165	165	165	x	165
166	0	1	0	1	1	1	1	0	1	1	1	1	1	1	0	1	1	0	0	0	1	0	0	0	0	0	0	0	0	0	0	0		x	x	x	166	166	166	166	x	166	166	x	166	166	166	x	166
167	1	0	1	1	1	1	1	0	1	1	1	1	1	1	0	1	1	0	0	0	1	0	0	0	0	0	0	0	0	0	0	0		167	x	x	167	167	167	167	x	167	167	x	167	167	167	x	167
168	1	0	0	1	1	1	1	1	1	1	1	1	1	1	0	1	1	0	0	0	1	0	0	1	1	0	0	0	0	0	1	0		168	x	x	168	x	168	168	x	168	168	x	168	168	168	x	168
169	1	0	1	1	1	1	1	0	1	1	1	1	1	1	1	1	1	0	0	0	1	1	0	0	0	1	0	1	1	0	0	0		x	x	x	169	x	169	169	x	169	169	x	169	169	169	x	169
170	1	0	1	1	1	1	1	0	1	1	0	1	1	1	1	1	1	1	0	1	1	1	0	0	0	0	0	0	1	0	0	0		x	x	x	170	x	170	170	x	170	170	x	170	170	170	x	170
171	1	0	0	1	1	1	1	0	1	1	0	1	1	1	0	1	1	0	0	0	0	1	0	1	0	0	0	0	1	0	0	0		x	x	x	171	x	171	171	x	171	171	x	171	171	x	x	171
172	1	0	0	1	0	1	1	1	1	1	0	1	1	1	0	1	1	0	0	0	0	1	0	0	0	1	0	0	0	0	1	0		x	x	x	172	x	172	172	x	172	172	x	172	172	x	x	172
173	0	0	0	1	0	1	1	0	1	1	1	1	1	1	0	1	1	0	0	0	0	1	0	0	1	0	0	0	0	0	1	1		x	x	x	173	x	173	173	x	173	173	173	173	173	x	x	173
174	0	1	0	1	0	1	1	0	1	1	1	1	1	1	0	1	1	0	0	0	0	1	0	1	0	0	0	0	0	0	0	0		x	174	x	174	x	174	174	x	174	174	174	174	174	x	x	174
175	0	1	0	1	1	1	1	0	1	1	1	1	1	0	1	1	1	0	0	0	0	1	0	0	0	0	0	0	0	0	0	0		x	175	x	175	175	175	175	x	175	175	175	175	175	x	x	175
176	1	1	0	1	1	1	1	0	1	1	1	1	1	1	1	1	1	0	0	1	0	1	0	0	0	1	0	0	1	0	0	0		x	176	x	176	176	176	176	x	176	176	176	176	176	x	x	176
177	0	1	0	1	1	1	1	1	1	1	1	1	1	1	0	1	1	0	0	0	0	1	0	0	0	0	1	0	0	0	0	0		x	177	x	177	177	177	177	x	177	177	177	177	177	x	x	177
178	0	1	0	1	1	1	1	0	1	1	1	1	1	0	1	1	1	0	0	0	0	1	0	0	0	0	0	0	0	0	0	0		x	178	x	178	x	178	178	x	178	178	178	178	178	x	x	178
179	0	1	0	1	1	1	1	0	1	1	1	1	1	1	1	1	1	0	0	0	0	1	0	0	0	0	0	0	0	0	0	0		x	179	x	179	x	179	179	x	179	179	x	x	179	x	x	179
180	0	1	1	1	1	1	1	0	1	1	1	1	1	1	0	1	1	0	0	0	0	1	0	0	0	0	0	0	1	0	0	0		x	180	180	180	x	180	180	x	180	180	x	x	180	x	x	180
181	0	1	1	1	1	1	1	0	1	1	1	1	1	1	0	1	1	0	0	0	0	1	0	0	0	0	0	0	1	0	0	0		x	x	181	181	x	181	181	x	181	181	x	x	181	x	x	181
182	0	1	1	1	0	1	1	0	1	1	1	1	1	0	0	1	1	0	0	0	0	1	0	0	0	0	0	0	0	0	1	0		x	x	x	182	x	182	182	x	182	182	x	x	182	x	x	182
183	0	1	1	1	0	1	1	0	1	1	0	0	1	1	1	1	1	0	0	1	0	1	0	0	0	0	0	0	1	1	0	0		x	x	x	183	x	183	183	x	x	183	x	x	183	183	x	183
184	1	1	1	1	1	1	1	0	1	1	0	0	1	1	0	1	1	0	0	1	0	1	0	0	0	0	1	1	1	0	0	1		184	x	x	x	184	184	184	x	x	184	x	x	184	184	x	184
185	1	0	1	1	1	1	1	0	1	1	0	1	1	1	0	1	1	0	0	1	0	1	0	0	0	0	0	1	0	0	0	1		x	x	x	x	185	185	185	x	x	185	x	x	185	185	x	185
186	1	0	0	1	1	1	1	0	1	1	0	0	1	1	0	1	1	0	0	1	0	0	0	0	0	0	0	1	1	0	0	1		x	x	x	x	186	186	186	x	x	186	x	x	186	186	x	186
187	1	1	0	1	1	1	1	0	0	1	1	1	1	1	0	1	1	1	0	1	0	0	1	0	0	0	0	0	0	0	0	1		x	x	x	x	187	187	187	x	x	187	x	187	187	187	x	187
188	1	0	1	0	1	1	1	0	0	1	0	1	1	1	0	1	1	1	0	0	0	0	0	0	0	1	1	1	0	0	0	1		x	x	x	x	188	188	188	x	x	188	x	188	188	188	x	188
189	0	0	0	1	1	1	1	0	1	1	0	1	1	1	0	1	1	0	0	1	0	0	0	0	1	1	0	0	0	0	1	1		x	x	x	189	189	189	189	x	x	189	x	189	189	189	x	189
190	0	0	1	1	1	1	1	0	0	1	1	1	1	1	0	1	1	0	0	1	0	0	0	0	0	0	0	0	1	0	0	1		x	x	x	190	190	190	190	x	x	190	190	190	190	190	x	190
191	0	1	0	1	1	1	1	0	0	1	1	1	1	1	0	1	1	0	0	1	0	0	0	0	0	0	1	0	1	1	0	1		x	x	x	191	191	191	191	x	x	191	191	191	191	191	x	191
192	0	0	0	1	1	1	1	0	1	1	1	1	1	1	0	1	1	0	0	0	0	0	0	0	0	0	0	0	0	0	0	0		x	x	x	192	192	192	192	x	192	192	192	192	192	192	x	192
193	0	1	0	1	1	1	1	0	1	1	1	1	1	1	0	1	1	0	0	0	0	0	0	0	0	1	0	0	0	0	1	0		x	x	x	193	193	193	193	x	193	193	193	193	193	193	x	193
194	0	0	0	1	1	1	1	0	1	1	1	1	1	1	0	1	1	1	0	0	0	0	0	0	0	0	0	0	0	0	0	0		x	x	x	194	194	194	194	x	194	194	194	194	194	194	x	194
195	0	0	0	1	1	1	1	0	1	1	1	1	1	1	0	1	1	0	0	1	1	0	0	1	0	0	0	0	0	0	0	0		x	x	x	195	195	195	195	x	195	195	195	195	195	195	x	195
196	0	0	0	1	1	1	1	0	1	1	1	1	1	1	1	1	1	0	0	1	0	0	0	0	0	1	0	0	1	0	0	0		x	x	x	x	196	196	196	x	196	196	196	196	196	196	x	196
197	0	0	0	1	1	1	1	0	1	1	1	1	1	1	0	1	1	0	0	1	0	0	0	0	0	0	0	0	1	0	0	0		x	x	x	x	197	197	197	x	197	197	197	197	197	197	x	197
198	1	1	0	1	1	1	1	0	1	1	1	1	1	1	1	1	1	0	0	1	0	0	0	0	0	0	1	0	0	0	1	0		x	198	x	x	198	198	198	x	198	198	198	198	198	198	x	198
199	0	1	1	1	1	1	1	0	1	1	1	1	1	1	1	1	1	0	0	1	0	0	0	0	0	1	0	1	1	0	1	0		x	199	x	x	x	199	199	x	199	199	199	199	199	199	x	199
200	0	1	0	0	1	1	1	0	1	1	1	1	1	1	1	1	1	1	0	1	0	0	0	0	0	1	0	1	1	0	1	0		x	x	x	x	x	200	200	x	200	200	200	200	200	200	x	200
201	0	1	0	1	1	1	1	0	1	1	1	1	1	1	1	1	1	0	0	1	0	0	0	1	0	0	0	1	1	0	1	0		x	x	x	x	x	201	201	x	201	201	201	201	201	201	x	201
202	1	1	1	0	1	1	1	0	1	1	1	1	1	1	0	1	1	0	0	1	0	0	0	0	0	1	1	1	1	0	0	1		x	x	x	x	x	202	202	x	202	202	202	202	202	202	x	202
203	0	1	1	0	0	1	1	1	1	1	1	1	1	1	0	1	1	1	0	1	0	0	0	1	0	0	1	1	1	0	0	0		x	x	x	x	x	203	203	x	203	203	203	203	203	203	x	203
204	1	0	0	1	0	1	1	0	1	1	1	1	1	1	0	1	1	1	0	1	0	0	0	0	0	0	0	1	1	0	0	0		x	x	x	204	x	204	204	x	204	204	x	204	204	204	x	204
205	1	0	0	1	0	1	1	0	1	1	1	1	1	1	0	1	1	0	0	1	0	0	0	0	0	1	0	0	1	0	0	0		x	x	x	x	x	205	205	x	205	205	x	205	205	205	x	205
206	0	0	1	1	1	1	1	0	1	1	1	1	1	1	1	1	1	0	0	1	0	0	0	0	0	0	0	0	0	0	0	0		x	x	x	x	x	206	206	x	206	206	x	206	206	206	x	206
207	0	1	1	1	1	1	1	0	1	1	1	1	1	1	1	1	1	0	0	1	0	0	0	0	0	0	0	0	0	0	0	0		x	x	x	x	x	207	207	x	207	207	x	207	207	207	x	207
208	0	0	1	1	1	1	1	0	1	1	0	1	1	1	1	1	1	0	0	1	0	0	0	0	1	0	0	1	0	1	0	1		x	x	x	x	x	208	208	x	208	208	x	208	208	208	x	208
209	0	0	0	0	1	1	1	0	1	1	0	1	1	1	1	1	1	0	0	1	0	0	0	0	0	0	1	0	0	0	0	0		x	x	x	x	x	209	209	x	209	209	x	209	209	209	x	209
210	0	1	0	0	0	1	1	0	1	1	0	1	1	1	0	1	1	0	0	1	0	0	0	0	0	1	1	0	0	0	1	0		x	x	x	x	x	210	210	x	210	210	x	210	210	210	x	210
211	0	0	1	0	0	1	1	0	1	1	0	1	1	1	0	1	1	0	0	1	0	0	0	0	0	0	0	1	1	0	1	0		x	x	x	x	x	211	211	x	211	211	x	211	211	211	x	211
212	1	0	1	0	0	1	1	0	1	1	0	1	1	1	1	1	1	0	0	1	0	0	0	1	0	0	0	0	0	0	1	0		x	x	x	x	x	212	212	x	212	212	x	212	212	212	x	212
213	0	0	1	0	1	1	1	0	1	1	1	1	1	1	0	1	1	0	0	1	0	1	0	1	0	0	0	1	1	0	1	0		x	x	x	x	x	213	213	x	213	213	x	213	213	213	x	213
214	1	1	0	1	1	1	1	0	1	1	0	1	1	1	0	1	1	0	0	1	0	0	0	1	0	0	0	1	1	0	1	0		x	214	x	214	x	214	214	x	214	214	x	214	214	214	x	214
215	0	1	1	1	0	1	1	0	1	1	0	1	1	1	1	1	1	0	0	1	0	0	0	1	0	0	0	1	1	0	1	0		x	215	x	215	x	215	215	x	215	215	x	215	215	215	215	215
216	1	1	1	1	1	1	1	0	1	1	0	1	1	1	1	1	1	0	0	1	1	0	0	1	0	0	0	1	1	0	1	0		x	216	x	216	216	216	216	x	216	216	x	216	216	216	216	216
217	1	1	0	1	1	1	1	0	1	1	0	1	1	1	1	1	1	0	1	1	0	0	0	0	0	0	0	0	1	0	1	0		x	217	x	217	217	217	217	x	217	217	x	217	217	217	217	217
218	0	1	0	1	1	1	1	0	1	1	1	1	1	1	1	1	1	0	0	1	0	1	0	0	1	1	0	0	1	0	1	0		x	218	x	218	218	218	218	x	218	218	218	218	218	218	218	218
219	1	1	0	1	1	1	1	0	1	1	1	1	1	1	1	1	1	0	0	1	0	1	0	0	0	0	0	0	1	0	1	0		x	219	x	219	219	219	219	x	219	219	219	219	219	219	x	219
220	0	1	0	1	1	1	1	0	1	1	1	1	1	1	1	1	1	0	0	1	0	1	0	0	0	1	0	0	1	0	0	0		x	220	x	220	220	220	220	x	220	220	220	220	220	220	x	220
221	0	1	0	1	1	1	1	0	1	1	1	1	1	1	1	1	1	0	0	1	0	1	0	0	0	1	0	0	1	0	0	0		x	221	x	221	221	221	221	x	221	221	221	221	221	221	x	221
222	1	1	0	1	1	1	1	0	1	1	1	1	1	1	1	1	1	0	0	1	0	1	0	0	0	1	0	0	1	0	0	0		x	222	x	222	222	222	222	x	222	222	222	222	222	222	x	222
223	0	1	0	1	1	1	1	0	1	1	1	1	1	1	0	1	1	1	1	1	0	1	0	0	0	0	0	0	1	0	0	0		x	223	x	223	223	223	223	x	223	223	223	223	223	223	x	223
224	1	1	0	1	1	1	1	0	1	1	1	1	1	1	0	1	1	0	0	1	0	1	0	0	0	0	0	0	1	0	0	0		x	224	x	224	224	224	224	x	224	224	x	224	224	224	x	224
225	0	1	0	1	1	1	1	0	1	1	1	1	1	1	0	1	1	0	0	1	0	1	0	1	0	0	0	0	0	0	0	0		x	225	x	225	225	225	225	x	225	225	x	225	225	225	x	225
226	1	1	0	1	1	1	1	0	1	1	1	1	1	1	0	1	1	0	0	1	0	0	0	0	0	0	0	0	0	0	0	0		226	226	x	226	226	226	226	x	226	226	x	226	226	226	x	226
227	1	1	0	1	1	1	1	0	1	1	1	1	1	1	0	1	1	0	0	1	1	0	0	0	0	0	0	0	0	0	0	0		227	227	x	227	227	227	227	x	227	227	x	227	227	227	x	227
228	1	1	0	1	1	1	1	0	1	1	0	1	1	1	0	1	1	1	0	1	0	0	0	0	1	0	0	1	0	1	0	1		228	228	x	228	228	228	228	x	228	228	x	228	228	228	x	228
229	1	1	1	1	1	1	1	1	1	1	0	1	1	1	1	1	1	0	0	1	0	0	1	0	1	0	0	0	0	1	0	1		229	x	229	229	229	229	229	x	229	229	x	229	229	229	x	229
230	1	1	1	1	1	1	1	0	1	1	0	1	1	1	0	1	1	0	1	1	1	0	1	1	1	0	0	0	0	1	0	1		x	x	230	230	230	230	230	x	230	230	x	230	230	230	x	230
231	1	1	1	1	1	1	1	0	1	1	0	1	1	1	1	1	1	0	0	1	1	0	1	0	1	0	1	1	0	1	0	1		x	x	x	231	231	231	231	x	231	231	x	231	231	231	x	231
232	1	1	1	1	1	1	1	0	1	1	0	1	1	1	0	1	1	1	1	1	1	0	1	0	1	0	0	1	0	0	0	1		x	x	x	232	232	232	232	x	232	232	x	232	232	232	x	232
233	1	0	1	1	1	1	1	0	1	1	0	1	1	1	0	1	1	0	0	1	1	0	1	0	1	0	0	0	0	0	0	1		x	x	x	233	233	233	233	x	233	233	x	233	233	233	x	233
234	0	0	1	1	1	1	1	0	1	1	1	1	1	1	0	1	1	0	1	1	1	0	1	0	1	1	0	1	0	0	1	1		x	x	x	234	234	234	234	x	234	234	234	234	234	234	x	234
235	1	0	0	1	1	1	1	0	1	1	1	1	1	1	0	1	1	0	0	1	0	0	1	0	1	0	1	0	0	0	0	1		x	x	x	235	235	235	235	x	x	235	235	235	235	235	x	235
236	0	0	0	1	1	1	1	0	1	1	1	1	1	1	0	1	1	0	0	1	0	0	1	0	1	0	1	0	1	0	0	1		x	x	x	236	236	236	236	x	x	236	236	236	236	236	x	236
237	0	0	0	1	1	1	1	0	1	1	1	1	1	1	0	1	1	0	1	1	0	0	1	0	1	0	0	0	0	0	0	1		x	x	x	237	237	237	237	x	x	237	237	237	237	237	x	237
238	0	1	0	1	1	1	1	0	1	1	1	1	1	1	0	1	1	0	1	1	1	1	1	0	0	1	0	0	0	0	0	1		x	x	x	238	238	238	238	x	x	238	238	238	238	238	x	238
239	0	1	0	1	1	1	1	0	0	1	1	1	1	1	0	1	1	0	1	1	1	0	0	0	0	0	0	0	0	0	0	1		x	x	x	239	239	239	239	x	x	239	239	239	239	239	x	239
240	0	1	0	1	1	1	1	0	1	1	1	1	1	1	1	1	1	0	1	1	0	0	1	0	0	0	0	0	0	0	0	1		x	x	x	240	240	240	240	x	240	240	240	240	240	240	x	240
241	0	0	1	1	1	1	1	0	1	1	1	1	1	1	0	1	1	0	1	1	0	0	1	0	0	0	0	0	0	0	0	1		x	x	x	241	241	241	241	x	241	241	241	241	241	241	x	241
242	0	1	1	1	1	1	1	0	1	1	1	1	1	1	0	1	1	0	1	1	0	0	0	0	0	1	0	1	1	0	1	1		x	x	x	242	x	242	242	x	242	242	242	242	242	242	x	242
243	1	0	1	1	1	1	1	0	1	1	1	1	1	1	0	1	1	0	1	1	1	1	0	0	0	1	0	1	1	1	1	1		243	x	x	243	x	243	243	x	243	243	243	243	243	243	x	243
244	1	1	0	1	1	1	1	0	1	1	1	1	1	1	0	1	1	0	1	1	0	1	0	1	0	1	0	1	1	0	1	1		244	x	x	244	x	244	244	x	244	244	244	244	244	244	x	244
245	1	0	0	1	1	1	1	0	1	1	1	1	1	1	0	1	1	0	1	0	1	1	0	0	1	1	0	1	1	0	1	1		x	x	x	245	x	245	245	x	245	245	245	245	245	245	x	245
246	1	1	1	1	0	1	1	0	1	1	1	1	1	1	1	1	1	0	1	0	1	1	0	0	1	1	0	1	1	0	1	0		x	x	x	246	x	246	246	x	246	246	246	246	246	246	x	246
247	1	1	1	1	1	1	1	0	1	1	1	1	1	1	1	1	1	0	1	0	1	1	0	1	0	1	0	1	1	0	1	0		x	x	x	247	247	247	247	x	247	247	247	247	247	247	x	247
248	1	0	0	1	1	1	1	0	1	1	1	1	1	1	0	1	1	0	1	0	1	1	0	0	0	1	0	1	1	0	1	0		x	x	x	248	248	248	248	x	248	248	248	248	248	248	x	248
249	0	0	0	1	1	1	1	0	1	1	1	1	1	1	0	1	1	0	1	0	0	1	0	0	0	1	0	1	1	0	1	0		x	x	x	249	x	249	249	x	249	249	249	249	249	249	x	249
250	1	1	0	1	1	1	1	0	1	1	1	1	1	1	1	1	1	0	1	1	1	1	0	1	0	1	0	1	1	0	1	0		x	250	x	250	x	250	250	x	250	250	250	250	250	250	x	250
251	1	1	0	1	1	1	1	0	1	1	1	1	1	1	0	1	1	0	0	1	1	1	0	1	0	0	0	0	1	0	1	0		x	x	x	251	x	251	251	x	251	251	251	251	251	251	x	251
252	0	1	0	1	1	1	1	0	1	1	1	1	1	1	0	1	1	0	1	1	0	1	0	1	0	0	0	0	1	0	1	0		x	x	x	252	x	252	252	x	252	252	252	252	252	252	x	252
253	0	1	0	1	0	1	1	0	1	1	1	1	1	1	0	1	1	0	0	1	0	1	0	0	0	0	0	1	1	1	1	0		x	x	x	253	x	253	253	x	253	253	253	253	253	253	x	253
254	0	1	0	1	0	1	1	0	1	1	1	1	1	1	0	1	1	1	0	0	1	0	0	0	0	0	1	0	1	1	1	0		x	x	x	254	x	254	254	x	254	254	254	254	254	254	x	254
255	1	0	0	1	1	1	1	0	1	1	1	1	1	1	0	1	1	0	0	0	1	0	0	0	0	1	0	0	1	1	0	0		x	x	x	255	255	255	255	x	255	255	255	255	255	255	x	255
256	1	1	1	1	1	1	1	0	1	1	1	1	1	1	0	1	1	0	0	1	1	1	0	0	0	1	1	0	1	1	0	0		x	x	x	256	256	256	256	x	256	256	256	256	256	256	x	256
257	0	0	0	1	1	1	1	0	1	1	1	1	1	1	0	1	1	0	0	1	0	0	0	0	0	1	0	1	1	1	0	0		x	x	x	257	257	257	257	x	257	257	257	257	257	257	x	257
258	1	1	0	1	1	1	1	1	1	1	1	1	1	1	0	1	1	1	0	1	1	1	1	0	1	1	0	0	1	1	0	0		x	258	x	258	258	258	258	x	258	258	258	258	258	258	x	258
259	0	1	0	1	1	1	1	0	1	1	1	1	1	1	0	1	1	0	0	1	1	0	0	0	0	1	0	1	1	1	1	0		x	259	x	259	259	259	259	x	259	259	259	259	259	259	x	259
260	0	1	1	1	1	1	1	1	1	1	1	1	1	1	0	1	1	0	1	1	1	0	0	0	0	1	1	0	1	0	1	0		x	x	x	260	260	260	260	x	260	260	260	260	260	260	x	260
261	1	1	0	1	1	1	1	1	1	1	1	1	1	1	0	1	1	0	1	1	1	0	0	1	1	1	1	1	1	1	1	0		x	x	x	261	261	261	261	x	261	261	261	261	261	261	x	261
262	1	1	0	1	1	1	1	1	1	1	1	1	1	1	1	1	1	0	1	1	1	0	1	1	0	1	0	0	1	1	1	0		x	x	x	262	262	262	262	x	262	262	262	262	262	262	x	262
263	1	1	0	1	1	1	1	0	1	1	1	1	1	1	0	1	1	0	1	1	1	0	0	0	0	1	1	1	1	1	1	0		x	x	x	263	263	263	263	x	263	263	263	263	263	263	x	263
264	1	0	0	1	1	1	1	1	1	1	1	1	1	1	0	1	1	0	1	1	1	0	0	1	1	1	0	1	1	0	1	0		x	x	x	264	264	264	264	264	264	264	264	264	264	264	x	264
265	0	0	0	1	1	1	1	1	1	1	1	1	1	1	0	1	1	0	1	1	1	1	0	1	0	1	0	1	1	1	1	0		x	x	x	265	265	265	265	265	265	265	265	265	265	265	x	265
266	1	0	0	1	1	1	1	1	1	1	1	1	1	1	1	1	1	0	0	1	1	0	0	0	0	1	0	1	1	0	1	0		x	x	x	266	266	266	266	266	x	266	266	266	266	266	x	266
267	0	0	1	1	1	1	1	1	1	1	1	1	1	1	0	1	1	0	1	1	1	0	0	1	0	1	0	1	1	0	1	0		x	x	x	267	267	267	267	267	x	267	267	267	267	267	x	267
268	0	0	0	1	1	1	1	1	1	1	1	1	1	1	0	1	1	0	1	0	1	0	0	1	0	1	0	1	1	0	1	0		x	x	x	268	268	268	268	268	x	268	x	268	268	268	x	268
269	0	0	0	1	1	1	1	1	1	1	1	1	1	1	1	1	1	0	1	0	1	0	0	0	0	1	0	1	1	1	1	1		x	x	x	269	269	269	269	269	x	269	x	269	269	269	x	269
270	1	1	0	1	1	1	1	1	0	1	1	1	1	1	0	1	1	1	0	0	1	0	0	1	0	1	0	1	1	1	1	1		x	x	x	270	270	270	270	270	x	270	x	270	270	270	x	270
271	0	1	1	1	1	1	1	1	0	1	1	1	1	1	0	1	1	0	1	0	1	0	0	1	0	1	1	1	1	1	1	1		x	x	x	271	271	271	271	271	x	271	x	271	271	271	x	271
272	0	1	1	1	1	1	1	1	0	1	0	1	1	1	0	1	1	1	1	0	1	0	0	1	1	1	1	1	1	1	1	1		x	x	x	272	272	272	272	272	x	272	x	272	272	272	x	272
273	1	1	1	1	1	1	1	1	1	1	0	1	1	1	0	1	1	0	1	0	1	0	0	1	1	1	1	1	1	0	1	1		x	x	x	273	273	273	273	273	273	273	x	273	273	273	x	273
274	0	0	1	1	1	1	1	1	1	1	0	1	1	1	0	1	1	0	1	1	1	1	0	1	1	1	1	0	0	0	1	1		x	x	x	274	274	274	274	274	274	274	x	274	274	274	x	274
275	1	0	0	1	1	1	1	1	1	1	1	1	1	1	0	1	1	0	1	1	1	1	0	1	1	1	0	0	0	1	1	1		x	x	x	275	275	275	275	275	275	275	x	275	275	275	x	275
276	1	1	0	1	1	1	1	1	1	1	1	1	1	1	1	1	1	0	1	1	1	1	0	1	1	1	0	1	0	0	1	1		x	x	x	276	276	276	276	276	276	276	x	276	276	x	x	x
277	0	1	1	1	1	1	1	1	1	1	0	1	1	1	1	1	1	0	1	1	1	1	0	1	1	1	0	1	1	0	1	1		x	x	x	277	277	277	277	277	277	277	x	277	277	x	x	x
278	0	1	1	1	1	1	1	1	1	1	0	1	1	1	1	1	1	0	1	1	1	1	0	0	0	1	1	1	1	1	1	1		x	x	x	278	278	278	278	278	278	278	x	278	278	x	x	x
279	1	0	0	1	1	1	1	1	1	1	0	1	1	1	0	1	1	0	1	1	1	1	0	1	1	1	1	1	1	0	0	1		279	x	x	279	279	279	279	279	279	279	x	279	279	x	x	x
280	1	0	0	1	1	1	1	1	1	1	0	1	1	0	1	0	1	1	1	1	1	1	0	0	1	1	1	0	1	0	0	1		x	x	x	280	280	280	280	280	280	280	x	280	280	x	x	x
281	1	0	0	1	1	1	1	1	1	1	1	1	1	1	0	1	1	0	1	1	1	1	0	0	1	1	1	0	1	0	0	1		x	x	x	281	281	281	281	281	281	281	281	281	281	281	x	281
282	1	1	0	1	1	1	1	1	1	1	1	1	1	1	1	1	1	0	1	1	1	1	0	0	1	1	1	0	1	0	0	1		x	282	x	282	282	282	282	282	282	282	282	282	282	282	x	282
283	1	1	0	1	1	1	1	1	1	1	1	1	1	1	0	1	1	0	1	0	1	1	1	1	1	1	1	0	1	1	0	1		x	283	x	283	283	283	283	283	283	283	283	283	283	283	x	283
284	0	1	0	1	1	1	1	1	1	1	1	1	1	1	1	1	1	0	1	0	1	1	0	0	1	1	1	0	1	0	0	1		x	284	x	284	284	284	284	284	284	284	284	284	284	284	x	284
285	0	1	1	1	1	1	1	1	1	1	1	1	1	1	0	1	1	0	1	0	1	1	0	0	1	1	1	0	1	0	0	1		x	285	x	285	285	285	285	285	285	285	285	285	285	285	x	285
286	0	1	0	1	1	1	1	1	1	1	1	1	1	1	0	1	1	0	0	0	1	1	0	0	1	1	1	0	1	0	0	0		x	286	x	286	286	286	286	286	286	286	286	286	286	286	x	286
287	1	1	0	1	1	1	1	1	1	1	1	1	1	1	0	1	1	1	0	0	1	1	0	0	1	1	1	0	1	1	1	0		x	287	x	287	287	287	287	287	287	287	x	287	287	287	x	287
288	0	1	0	1	1	1	1	1	1	1	1	1	1	1	0	1	1	0	1	1	1	1	0	0	1	1	1	0	1	0	0	0		x	288	x	288	288	288	288	288	288	288	x	288	288	288	x	288
289	0	1	0	1	1	1	1	1	1	1	1	1	1	1	0	1	1	0	0	1	1	1	0	0	0	1	1	0	1	1	1	0		x	289	x	289	289	289	289	289	289	289	x	289	289	289	x	289
290	0	1	1	1	1	1	1	1	1	1	1	1	1	1	1	1	1	0	1	1	1	1	1	0	0	1	1	0	1	0	1	1		x	290	x	290	290	290	290	x	290	290	x	290	290	290	x	290
291	1	1	1	1	1	1	1	1	1	1	0	1	1	1	0	1	1	0	1	1	1	1	0	0	0	1	1	0	1	0	1	1		x	291	x	291	291	291	291	x	291	291	x	291	291	291	x	291
292	0	1	1	1	1	1	1	1	1	1	0	1	1	1	1	1	1	0	1	1	1	1	0	0	0	1	1	1	1	1	1	1		x	292	x	292	292	292	292	x	292	292	x	292	292	292	292	292
293	1	1	1	1	1	1	1	1	1	1	0	1	1	1	1	1	1	0	1	1	1	1	0	0	1	1	1	0	1	1	1	1		x	293	x	293	293	293	293	x	293	293	x	293	293	293	293	293
294	1	1	0	1	1	1	1	0	1	1	0	1	1	1	1	1	1	0	1	1	1	1	0	0	0	1	1	1	1	0	1	1		x	294	x	294	294	294	294	x	294	294	x	294	294	x	x	294
295	0	1	0	1	1	1	1	0	1	1	0	1	1	1	1	1	1	0	1	1	1	1	0	0	0	1	1	1	1	1	1	0		x	295	x	295	295	295	295	x	295	295	x	295	295	x	x	295
296	0	1	0	1	1	1	1	0	1	1	0	1	1	1	1	1	1	1	0	1	1	1	0	0	1	1	1	1	1	1	1	0		x	296	x	296	296	296	296	x	296	296	x	296	296	x	x	296
297	1	1	0	1	1	1	1	0	1	1	0	1	1	1	1	1	1	0	1	1	1	1	0	0	0	1	1	0	1	0	1	0		x	297	x	297	297	297	297	x	297	297	x	297	297	x	x	297
298	1	1	0	1	1	1	1	0	1	1	0	1	1	0	0	1	1	0	0	1	1	1	0	0	0	1	0	1	1	0	1	0		x	298	x	298	298	298	298	x	298	298	x	298	298	x	x	298
299	0	1	0	1	1	1	1	0	1	1	0	1	1	1	0	1	1	0	1	1	1	1	0	0	1	1	0	1	1	1	0	1		x	299	x	299	299	299	299	x	299	299	x	299	299	x	x	299
300	1	1	0	1	1	1	1	0	1	1	1	1	1	0	0	1	1	1	0	1	1	1	0	0	1	1	0	1	1	1	0	0		x	x	x	300	300	300	300	x	300	300	300	300	300	x	x	300
301	0	1	0	1	1	1	1	0	1	1	1	1	1	1	0	1	1	1	1	1	1	1	0	0	1	1	0	0	1	0	1	0		x	x	x	301	301	301	301	x	301	301	301	301	301	301	x	301
302	0	1	0	1	1	1	1	0	1	1	1	1	1	1	0	1	1	0	1	1	1	1	0	0	1	1	0	0	1	0	1	0		x	x	x	302	302	302	302	x	302	302	302	302	302	x	x	302
303	1	1	1	1	1	1	1	0	1	1	1	1	1	1	0	1	1	0	1	1	1	0	0	0	1	1	1	0	1	0	1	1		303	x	x	303	303	303	303	x	303	303	303	303	303	x	x	303
304	1	0	0	1	1	1	1	0	1	1	1	1	1	1	0	1	1	0	1	1	1	0	0	1	0	1	0	0	1	0	1	0		304	x	x	304	304	304	304	x	304	304	304	304	304	x	x	304
305	1	1	0	1	1	1	1	1	1	1	1	1	1	1	1	1	1	0	1	1	1	1	0	0	1	1	0	0	1	1	1	0		x	305	x	305	305	305	305	305	305	305	305	305	305	x	305	305
306	1	1	1	1	1	1	1	1	1	1	1	1	1	0	1	1	1	0	1	1	1	1	0	0	1	1	0	0	1	0	1	0		x	306	306	306	306	306	306	306	306	306	306	306	306	x	306	306
307	1	1	1	1	1	1	1	1	1	1	1	1	1	0	1	1	1	0	1	1	1	1	0	0	1	1	0	0	1	1	1	0		x	307	x	307	307	307	307	307	307	307	307	307	307	x	307	307
308	1	1	1	1	1	1	1	1	1	1	1	1	1	1	1	1	1	0	1	1	1	1	0	0	1	1	0	0	1	1	1	1		x	x	x	308	308	308	308	x	308	308	308	308	308	308	308	308
309	0	1	1	1	1	1	1	1	1	1	1	1	1	1	1	1	1	0	1	1	1	1	0	0	1	1	0	0	1	1	1	0		x	x	x	309	309	309	309	x	309	309	309	309	309	309	309	309
310	0	1	1	1	1	1	1	1	1	1	1	1	1	1	1	1	1	0	1	1	1	1	1	0	1	1	0	0	1	1	1	1		x	x	x	310	310	310	310	x	310	310	310	310	310	310	310	310
311	1	1	0	1	1	1	1	1	1	1	1	1	1	1	1	1	1	0	1	1	1	1	0	0	1	1	0	0	1	1	1	1		311	x	x	311	311	311	311	x	311	311	311	311	311	311	311	311
312	1	0	1	1	1	1	1	0	1	1	1	1	1	1	1	1	1	1	1	1	1	1	0	0	1	1	0	0	1	0	1	1		312	x	x	312	312	312	312	x	312	312	312	312	312	x	312	312
313	1	0	0	1	1	1	1	1	1	1	1	1	1	1	1	1	1	0	1	1	1	1	0	1	1	1	0	0	1	0	1	0		x	x	x	313	313	313	313	x	313	313	313	313	313	x	313	313
314	1	1	0	1	1	1	1	0	1	1	1	1	1	1	1	1	1	0	1	1	1	1	0	1	1	1	0	0	1	1	1	1		x	x	x	314	314	314	314	x	314	314	314	314	314	x	314	314
315	1	1	0	1	1	1	1	1	1	1	1	1	1	1	1	1	1	0	1	1	1	1	0	1	1	1	0	0	1	0	1	1		x	x	x	315	315	315	315	x	315	315	315	315	315	x	x	315
316	1	1	0	1	1	1	1	0	1	1	1	1	1	0	1	1	1	0	1	1	1	1	0	0	1	1	1	0	1	0	1	1		x	x	x	316	x	316	316	x	316	316	316	316	316	x	x	316
317	0	1	1	1	1	1	1	0	1	1	1	1	1	1	1	1	1	0	1	1	1	1	0	0	0	1	0	0	1	0	1	0		x	x	x	317	x	317	317	x	317	317	317	317	317	317	x	317
318	0	0	0	1	1	1	1	0	1	1	1	1	1	1	1	1	1	0	1	1	1	1	0	0	0	1	0	0	1	0	1	1		x	x	x	318	x	318	318	x	318	318	318	318	318	x	x	318
319	1	0	1	1	1	1	1	1	1	1	1	1	1	1	0	1	1	0	1	1	1	1	0	0	0	1	1	0	1	0	1	1		x	x	319	319	x	319	319	319	319	319	319	319	319	x	x	319
320	1	0	1	1	0	1	1	1	1	1	1	1	1	1	0	1	1	0	1	1	1	1	0	0	0	1	0	0	1	1	1	0		x	x	320	320	x	320	320	320	320	320	320	320	320	x	x	320
321	0	0	1	1	1	1	1	1	1	1	1	1	1	1	1	1	1	0	1	1	1	1	0	0	0	1	1	0	1	1	1	1		x	x	321	321	321	321	321	321	321	321	321	321	321	x	x	x
322	0	1	1	1	1	1	1	1	1	1	1	1	1	0	1	1	1	0	1	1	1	1	0	1	0	1	1	1	1	1	1	0		x	322	322	322	322	322	322	322	322	322	322	322	322	x	x	x
323	0	1	1	1	1	1	1	1	1	1	1	1	1	1	1	1	1	0	1	1	1	1	0	1	0	1	1	1	1	1	1	1		x	323	323	323	323	323	323	323	323	323	323	323	323	323	x	x
324	0	1	1	1	1	1	1	1	1	1	1	1	1	1	0	1	1	0	1	1	1	1	1	1	0	1	1	1	1	1	1	1		x	x	324	324	324	324	324	324	324	324	324	324	324	x	x	x
325	1	1	1	1	1	1	1	1	1	1	1	1	1	1	0	0	1	0	1	1	1	1	0	1	0	1	1	1	1	1	1	1		325	x	325	325	325	325	325	325	325	325	325	325	325	x	x	x
326	1	1	1	1	1	1	1	1	1	1	1	1	1	1	0	0	1	0	1	1	1	1	0	0	0	1	1	1	1	1	1	1		326	x	326	326	326	326	326	x	326	326	326	326	326	x	x	x
327	1	1	1	1	1	1	1	1	1	1	1	1	1	1	0	0	1	1	1	1	1	1	1	0	0	1	1	1	1	1	1	1		x	x	x	327	327	327	327	x	327	327	327	327	327	x	x	x
328	1	0	1	1	1	1	1	1	1	1	1	1	1	0	0	0	1	0	1	1	1	1	0	0	0	1	1	1	1	1	1	1		x	x	x	328	328	328	328	x	328	328	328	328	328	x	x	x
329	1	1	1	1	1	1	1	1	1	1	1	1	1	1	0	0	1	0	1	1	1	1	0	0	0	1	1	0	1	1	1	1		x	x	x	329	329	329	329	x	329	329	329	329	329	329	x	x
330	1	1	1	1	1	1	1	0	1	1	1	1	1	1	0	0	1	0	1	0	1	1	0	0	1	1	1	0	1	1	1	1		x	x	x	330	330	330	330	x	330	330	330	330	330	330	x	x
331	0	0	0	1	1	1	1	1	1	1	1	1	1	1	0	0	1	1	1	0	1	1	0	0	1	1	1	0	1	1	1	1		x	x	x	331	331	331	331	x	331	331	331	331	331	x	x	x
332	0	0	0	1	1	1	1	0	1	1	1	1	1	1	1	0	1	0	1	0	1	1	0	0	1	1	1	0	1	1	1	1		x	x	x	332	332	332	332	x	332	332	332	332	332	x	x	x
333	0	0	1	1	1	1	1	0	1	1	1	1	1	1	0	1	1	0	1	0	1	1	0	0	1	1	1	0	1	1	1	1		x	x	x	333	333	333	333	x	333	333	333	333	333	x	x	x
334	0	1	1	1	1	1	1	1	1	1	1	1	1	1	0	1	1	0	1	1	1	1	0	0	1	1	1	0	1	1	1	1		x	x	x	334	334	334	334	x	334	334	334	334	334	x	x	x
335	0	0	0	1	1	1	1	0	1	1	1	1	1	0	1	0	1	0	1	1	1	1	0	1	1	1	1	0	1	1	1	1		x	x	x	335	335	335	335	x	335	335	335	335	335	x	335	x
336	0	0	0	1	1	1	1	0	1	1	1	1	1	1	1	0	1	0	1	0	1	1	0	0	1	1	1	0	1	1	1	1		x	x	x	336	336	336	336	x	336	336	336	336	336	x	336	x
337	0	0	0	1	1	1	1	0	1	1	1	1	1	1	1	1	1	0	1	1	1	1	0	1	1	1	1	0	1	1	1	1		x	x	x	337	337	337	337	x	337	337	337	337	337	x	337	337
338	1	0	0	1	1	1	1	1	1	1	1	1	1	1	1	1	1	0	1	1	1	1	0	0	1	1	1	0	1	1	1	1		x	x	x	338	338	338	338	338	338	338	338	338	338	x	338	338
339	1	0	1	1	1	1	1	1	1	1	1	1	1	1	1	1	1	0	1	0	1	1	1	1	1	1	1	0	1	1	1	1		x	x	x	339	339	339	339	339	339	339	339	339	339	x	339	339
340	1	1	0	1	1	1	1	1	1	1	1	1	1	0	1	1	1	1	1	1	1	1	0	1	1	1	1	0	1	1	1	1		x	x	x	340	x	340	340	340	340	340	340	340	340	x	340	x
341	1	0	0	1	1	1	1	1	1	1	1	1	1	1	1	1	1	0	1	1	1	1	0	0	1	1	1	0	1	1	1	1		x	x	x	341	x	341	341	341	341	341	341	341	341	x	341	x
342	0	0	0	1	1	1	1	1	1	1	1	1	1	0	1	1	1	0	1	1	1	1	1	1	1	1	1	1	1	1	1	1		x	x	x	342	x	342	342	342	342	342	342	342	342	x	342	x
343	0	0	0	1	1	1	1	1	1	1	1	1	1	1	1	1	1	0	1	1	1	1	0	0	1	1	1	1	1	1	1	1		x	x	x	343	x	343	343	343	343	343	343	343	343	x	x	x
344	0	1	0	1	0	1	1	1	1	1	1	1	1	0	1	0	1	0	1	0	1	1	0	1	1	1	1	1	1	1	1	1		x	344	x	344	x	344	344	344	344	344	344	344	344	x	x	x
345	0	1	0	1	0	1	1	1	1	1	1	1	1	0	1	0	1	0	1	0	1	1	0	0	1	1	1	1	1	1	1	1		x	x	x	345	x	345	345	345	345	345	345	345	345	x	x	x
346	1	1	0	1	0	1	1	1	1	1	1	1	1	1	1	1	1	1	1	0	1	1	0	0	1	1	1	1	1	1	1	1		x	x	x	346	x	346	346	346	346	346	346	346	346	346	x	x
347	0	1	0	1	1	1	1	1	1	1	1	1	1	1	0	1	1	0	1	0	1	1	0	1	1	1	1	0	1	1	1	1		x	x	x	347	x	347	347	347	347	347	347	347	347	347	x	x
348	1	1	0	1	0	1	1	1	1	1	1	1	1	1	1	1	1	0	1	0	1	1	0	0	1	1	1	0	1	1	1	1		348	x	x	348	x	348	348	348	348	348	348	348	348	348	x	x
349	1	0	0	1	1	1	1	1	1	1	1	1	1	1	0	1	1	1	1	0	1	1	0	0	1	1	1	0	1	1	1	1		x	x	x	349	x	349	349	349	349	349	349	349	349	x	x	x
350	1	1	0	1	1	1	1	1	1	1	1	1	1	1	1	0	1	1	1	0	1	1	0	0	0	1	1	0	1	1	1	1		x	350	x	350	x	350	350	350	350	350	350	350	350	x	x	x
351	1	1	0	1	1	1	1	1	1	1	1	1	1	1	0	0	1	1	1	1	1	1	0	1	0	1	1	0	1	1	1	1		x	351	x	351	x	351	351	351	351	351	351	351	351	x	x	x
352	1	1	0	1	0	1	1	1	1	1	1	1	1	1	0	0	1	1	1	0	1	1	1	1	0	0	0	0	1	1	1	0		x	x	x	352	x	352	352	352	352	352	352	352	352	x	x	x
353	0	1	0	1	1	1	1	1	1	1	1	1	1	0	1	1	1	1	1	1	1	1	0	1	1	0	1	0	1	1	1	1		x	x	x	353	x	353	353	353	353	353	353	353	353	x	x	x
354	0	1	0	1	1	1	1	1	1	1	1	1	1	1	0	1	0	1	1	1	1	1	0	1	1	1	1	1	1	1	1	0		x	x	x	354	x	354	354	354	354	354	354	354	354	x	x	x
355	1	1	1	1	1	1	1	1	1	1	1	1	1	0	0	1	0	1	1	1	1	1	1	1	1	0	1	1	1	1	1	0		x	x	x	355	x	355	355	355	355	355	355	355	355	x	x	x
356	1	0	0	1	0	1	1	1	1	1	1	1	1	1	1	0	0	1	1	0	1	1	0	1	1	1	1	1	1	1	1	0		x	x	x	356	x	356	356	356	x	356	356	356	356	x	x	x
357	0	0	0	1	1	1	1	1	1	1	1	1	1	0	1	0	1	1	1	1	1	1	1	1	1	1	1	1	1	1	1	0		x	x	x	357	357	357	357	357	x	357	357	357	357	x	x	x
358	1	0	0	1	1	1	1	1	1	1	1	1	1	1	1	1	1	1	1	1	0	1	0	0	1	1	1	0	1	1	1	0		358	x	x	358	358	358	358	358	x	358	358	358	358	358	x	358
359	1	0	0	1	1	1	1	1	1	1	1	1	1	1	0	1	1	0	1	0	0	1	1	0	1	1	1	0	1	1	1	0		x	x	x	359	359	359	359	359	x	359	359	359	359	359	x	359
360	1	1	0	1	1	1	1	1	0	1	1	1	1	1	1	1	1	0	1	0	1	1	0	1	1	1	1	0	1	1	1	0		x	x	x	360	360	360	360	360	x	360	360	360	360	360	x	360
361	1	1	1	1	1	1	1	1	0	1	1	1	1	1	0	1	1	0	1	1	1	1	0	0	1	1	1	0	1	1	1	0		x	x	x	361	361	361	361	361	x	361	361	361	361	361	x	361
362	1	1	1	1	1	1	1	1	1	1	1	1	1	1	0	1	1	0	1	1	1	1	0	1	1	1	1	0	1	1	1	0		x	x	x	362	362	362	362	362	362	362	362	362	362	362	x	362
363	0	0	1	1	1	1	1	1	1	1	1	1	1	1	0	1	0	0	1	1	1	1	0	0	1	1	1	0	1	1	1	0		x	x	x	363	x	363	363	363	x	363	363	x	363	363	x	363
364	0	0	1	1	1	1	1	1	1	1	1	1	1	1	0	1	0	0	1	1	1	1	0	0	1	1	1	0	1	1	1	0		x	x	x	364	x	364	364	364	x	364	364	x	364	364	x	364
365	0	0	0	1	1	1	1	1	1	1	1	1	1	1	0	1	0	0	1	1	1	1	1	0	1	1	1	0	1	1	1	0		x	x	x	365	x	365	365	365	x	365	365	x	365	365	x	365
366	0	1	0	1	1	1	1	1	1	1	1	1	1	1	1	1	1	0	1	1	1	1	1	0	0	1	1	1	1	1	1	0		x	x	x	366	x	366	366	366	x	366	366	x	366	366	x	366
367	1	1	0	1	0	1	1	1	0	1	1	0	1	1	0	1	1	0	1	0	1	1	0	0	1	1	1	1	1	1	1	1		x	x	x	367	x	367	367	367	x	367	367	x	367	367	x	367
368	1	1	0	1	0	1	1	1	1	1	1	1	1	1	1	1	1	0	1	1	1	1	0	0	1	1	1	0	1	1	1	0		x	x	x	368	x	368	368	368	368	368	368	368	368	368	x	368
369	0	0	1	1	0	1	1	1	1	1	1	1	1	1	1	1	1	0	1	0	1	1	0	0	0	1	1	1	1	1	1	1		x	x	369	369	x	369	369	369	369	369	369	369	369	369	x	x
370	1	0	1	1	0	1	1	1	1	1	1	1	1	1	1	1	1	0	1	1	1	1	0	0	1	1	1	1	1	1	1	1		x	x	370	370	x	370	370	370	370	370	370	370	370	x	x	x
371	0	1	1	1	0	1	1	1	1	1	1	1	1	1	1	1	1	0	1	1	1	1	0	0	1	0	1	0	1	1	1	1		x	371	371	371	x	371	371	371	x	371	371	371	371	x	x	x
372	0	1	1	1	1	1	1	1	1	1	1	1	1	1	0	1	1	1	1	1	1	1	0	1	0	0	1	1	1	1	1	1		x	372	x	372	x	372	372	372	x	372	372	372	372	x	x	x
373	0	1	1	1	0	1	1	1	1	1	1	1	1	1	0	0	1	0	1	1	1	1	0	0	0	1	1	1	1	1	1	1		x	373	x	373	x	373	373	373	x	373	373	373	373	x	x	x
374	0	1	1	1	0	1	1	1	1	1	1	1	1	0	0	0	1	0	1	1	1	1	0	0	0	1	1	1	1	1	1	1		x	374	x	374	x	374	374	x	x	374	374	374	374	x	x	x
375	0	1	1	1	0	1	1	1	0	1	1	1	1	0	0	0	1	0	1	1	1	1	0	0	0	0	1	1	1	1	1	1		x	375	x	375	x	375	375	x	x	375	375	375	375	x	x	x
376	0	1	0	1	0	1	1	1	1	1	1	1	1	1	0	0	1	1	1	1	1	1	0	1	0	1	1	0	1	1	1	1		x	376	x	376	x	376	376	x	x	376	376	376	376	376	x	x
377	1	1	0	1	1	1	1	1	0	1	1	1	1	1	1	1	1	0	1	1	1	1	0	0	0	0	1	0	1	1	1	1		x	377	x	377	x	377	377	x	x	377	377	377	377	377	x	377
378	0	1	0	1	1	1	1	0	0	1	1	1	1	1	1	1	1	0	1	1	1	1	0	1	1	0	1	1	1	1	1	1		x	378	x	378	x	378	378	x	x	378	378	378	378	378	x	378
379	0	1	0	1	1	1	1	0	0	1	1	1	1	1	1	1	1	0	1	1	1	1	0	1	1	0	1	0	1	1	1	0		x	379	x	379	x	379	379	x	x	379	379	379	379	379	x	379
380	0	1	0	1	1	1	1	0	0	1	1	1	1	1	0	1	1	0	1	1	1	1	0	0	0	0	1	0	1	1	1	0		x	380	x	380	x	380	380	x	x	380	380	380	380	380	x	380
381	1	1	0	1	0	1	1	0	1	1	1	1	1	1	1	1	1	0	1	1	1	1	0	0	0	0	1	0	1	1	1	0		x	381	x	381	x	381	381	x	381	381	381	381	381	381	381	381
382	1	1	1	1	1	1	1	0	1	1	1	1	1	1	1	1	1	0	1	1	1	1	0	0	0	0	1	0	1	1	1	0		x	382	382	382	x	382	382	x	382	382	382	382	382	382	382	382
383	0	1	1	1	0	1	1	0	1	1	1	1	1	1	1	1	1	0	1	1	0	1	0	0	1	1	1	0	1	1	1	0		x	383	383	383	x	383	383	x	383	383	383	383	383	383	383	383
384	1	1	1	1	1	1	1	0	1	1	1	1	1	1	1	1	1	1	1	1	0	1	0	0	1	1	1	1	1	1	1	0		x	384	384	384	x	384	384	x	384	384	384	384	384	384	x	x
385	0	1	1	1	1	1	1	0	1	1	1	1	1	1	1	1	1	1	1	1	0	1	0	0	1	1	1	1	1	1	1	0		x	385	x	385	x	385	385	x	385	385	385	385	385	x	x	x
386	1	1	1	1	0	1	1	0	1	1	1	1	1	1	1	1	1	1	1	1	0	1	1	1	0	1	1	1	1	1	1	0		x	386	x	386	x	386	386	x	386	386	386	386	386	x	x	x
387	0	1	1	1	1	1	1	0	1	1	1	1	1	1	1	1	1	1	1	1	0	1	0	1	0	1	1	1	1	1	1	0		x	x	x	387	x	387	387	x	387	387	387	387	387	x	x	x
388	1	1	1	1	1	1	1	0	1	1	1	1	1	1	0	0	1	1	1	1	0	1	0	0	0	1	1	1	1	1	1	0		x	x	x	388	x	388	388	x	388	388	388	388	388	x	x	x
389	1	1	0	1	1	1	1	0	1	1	1	1	1	0	0	1	1	1	1	1	1	1	0	1	0	1	1	1	1	1	1	0		x	x	x	389	x	389	389	x	389	389	389	389	389	x	x	x
390	1	1	0	1	1	1	1	0	1	1	1	1	1	1	0	0	1	1	1	1	0	1	0	1	0	1	1	0	1	1	1	0		x	x	x	390	x	390	390	x	390	390	390	390	390	390	x	x
391	1	0	1	1	0	1	1	0	1	1	1	1	1	1	0	0	1	0	1	1	0	1	0	0	0	1	1	0	1	1	1	0		x	x	391	391	x	391	391	x	391	391	391	391	391	391	x	x
392	0	1	1	1	1	1	1	0	1	1	1	1	1	1	0	1	1	0	1	1	0	1	0	0	0	1	1	1	1	1	1	0		x	x	x	392	392	392	392	x	392	392	392	x	392	392	x	392
393	0	0	1	1	1	1	1	0	1	1	1	1	1	1	0	1	1	0	1	1	0	1	0	0	0	1	1	1	1	1	1	1		x	x	x	393	x	393	393	x	393	393	393	x	393	393	x	393
394	0	1	1	1	1	1	1	0	1	1	1	1	1	1	0	1	1	0	1	1	1	1	0	1	0	1	1	0	1	1	1	0		x	x	x	394	x	394	394	x	394	394	394	x	394	394	x	394
395	0	0	1	1	1	1	1	0	1	1	1	1	1	1	0	1	1	0	1	1	1	1	0	1	0	1	1	0	1	1	1	1		x	x	x	x	x	395	395	x	395	395	395	x	395	395	x	395
396	0	0	0	1	1	1	1	0	1	1	1	0	1	1	1	1	1	0	1	1	1	1	0	1	1	1	1	1	1	1	1	0		x	x	x	x	x	396	396	x	396	396	396	x	396	396	396	396
397	0	1	0	1	0	1	1	0	1	1	1	1	1	1	1	1	1	1	1	1	1	1	0	1	0	1	1	0	1	1	1	0		x	397	x	x	x	397	397	x	397	397	397	397	397	397	397	397
398	1	1	0	1	0	1	1	1	1	1	1	1	1	1	1	1	1	1	1	1	1	1	0	1	0	1	1	0	1	1	1	1		x	x	x	x	x	398	398	x	398	398	398	398	398	398	398	398
399	0	1	0	0	0	1	1	0	1	1	1	1	1	1	1	1	1	1	1	1	1	1	1	1	0	1	1	0	1	1	1	1		x	x	x	x	x	399	399	x	399	399	399	399	399	399	x	399
400	1	1	0	1	1	1	1	0	1	1	1	1	1	1	1	1	1	0	1	1	1	1	0	1	0	1	1	1	1	1	1	1		400	x	x	400	x	400	400	x	400	400	400	400	400	400	x	400
401	1	1	0	1	0	1	1	1	1	1	1	1	1	1	1	1	1	0	1	1	1	1	0	1	0	1	1	0	1	1	1	1		401	x	x	401	x	401	401	x	401	401	401	401	401	401	x	401
402	1	0	0	1	0	1	1	0	1	1	1	1	1	1	1	1	1	0	1	1	1	1	1	1	1	1	1	0	1	1	1	1		402	x	x	402	x	402	402	x	402	402	402	402	402	402	x	402
403	1	0	0	1	1	1	1	1	1	1	1	1	1	1	0	1	1	0	1	1	1	1	0	1	0	0	1	0	1	1	1	0		403	x	x	403	403	403	403	x	403	403	403	403	403	403	x	403
404	1	0	0	1	1	1	1	1	1	1	1	1	1	1	0	1	1	0	1	1	1	1	0	1	0	1	0	0	1	1	1	1		404	x	x	404	404	404	404	x	404	404	404	404	404	x	x	404
405	1	1	0	1	1	1	1	0	1	1	1	1	1	1	1	1	1	0	1	0	1	1	0	0	0	0	1	0	1	1	1	1		405	405	x	405	405	405	405	x	405	405	405	405	405	x	405	405
406	1	1	0	1	1	1	1	1	1	1	1	1	1	1	1	1	1	0	1	1	1	1	1	0	0	1	1	1	1	1	1	1		406	406	x	406	406	406	406	x	406	406	406	406	406	x	406	406
407	1	1	0	1	1	1	1	0	1	1	1	1	1	1	1	1	1	1	1	1	1	1	0	1	1	0	1	1	1	1	1	1		407	407	x	407	407	407	407	x	407	407	407	407	407	x	407	407
408	1	1	1	1	1	1	1	1	1	1	1	1	1	0	1	1	1	0	1	1	1	1	0	0	0	1	1	0	1	1	1	1		408	408	408	408	408	408	408	x	408	408	408	408	408	x	408	408
409	1	1	1	1	1	1	1	0	1	1	1	1	1	1	1	1	1	0	1	1	1	1	0	0	0	1	1	0	1	1	1	1		409	409	409	409	409	409	409	x	409	409	409	409	409	x	409	x
410	1	1	1	1	1	1	1	0	1	1	1	1	1	1	1	1	1	1	1	1	1	1	0	0	1	1	1	0	1	1	1	1		410	410	410	410	410	410	410	x	410	410	410	410	410	x	410	x
411	1	1	1	1	1	1	1	0	1	1	1	1	1	0	1	1	1	1	1	1	1	1	0	0	0	0	1	0	1	1	1	1		411	411	411	411	411	411	411	x	411	411	411	411	411	x	411	x
412	1	1	1	1	1	1	1	0	1	1	1	1	1	0	1	1	1	0	1	1	1	1	0	0	1	1	1	0	1	1	1	1		412	412	x	412	412	412	412	x	412	412	412	412	412	x	412	x
413	1	1	1	1	1	1	1	0	1	1	1	1	1	1	1	0	1	0	1	1	1	1	0	1	1	1	1	0	1	1	1	1		413	413	x	413	413	413	413	x	413	413	413	413	413	413	413	x
414	1	1	1	1	1	1	1	0	1	1	1	1	1	1	1	1	1	0	1	1	1	1	0	1	1	1	1	0	1	1	1	1		x	414	x	414	414	414	414	x	414	414	414	414	414	414	414	x
415	1	1	1	1	1	1	1	0	1	1	1	1	1	1	1	1	1	0	1	1	1	1	1	1	1	1	1	1	1	1	1	1		x	415	x	415	415	415	415	x	415	415	415	415	415	x	415	x
416	1	1	0	1	1	1	1	0	1	1	1	1	1	1	1	0	1	0	1	1	1	1	0	1	1	1	1	1	1	1	1	1		x	416	x	416	416	416	416	x	416	416	416	416	416	x	416	x
417	1	1	1	1	1	1	1	0	1	1	1	1	1	1	1	1	1	0	1	1	1	1	0	0	1	1	1	0	1	1	1	1		x	417	x	417	417	417	417	x	417	417	417	417	417	x	417	x
418	0	1	0	1	1	1	1	0	1	1	1	1	1	1	1	1	1	0	0	1	1	1	0	1	1	1	1	0	1	1	1	1		x	418	x	418	418	418	418	x	418	418	418	418	418	x	x	x
419	0	1	0	1	1	1	1	1	1	1	1	1	1	0	1	1	1	0	1	1	1	1	0	1	0	1	1	0	1	1	1	1		x	419	x	419	419	419	419	x	419	419	419	419	419	x	x	x
420	0	1	0	1	1	1	1	0	1	1	1	1	1	1	1	1	1	0	1	1	1	1	0	0	0	1	1	0	1	1	0	1		x	420	x	420	420	420	420	x	420	420	420	420	420	420	x	x
421	1	1	0	1	1	1	1	0	1	1	1	1	1	1	1	0	1	1	1	1	1	1	0	0	0	1	1	1	1	1	1	1		x	421	x	421	421	421	421	x	421	421	421	421	421	421	x	x
422	1	1	1	1	1	1	1	0	1	1	1	1	1	1	0	0	1	0	1	1	1	1	0	0	1	1	1	1	1	1	1	1		x	422	x	422	422	422	422	x	422	422	422	422	422	422	x	x
423	0	1	0	1	1	1	1	1	1	1	1	1	1	1	0	0	1	0	1	1	1	1	0	0	0	1	1	1	1	1	1	1		x	423	x	423	423	423	423	x	423	423	423	423	423	423	x	x
424	1	1	0	1	1	1	1	1	1	1	1	1	1	1	0	0	1	0	1	1	1	1	0	0	0	1	1	1	1	1	1	1		x	424	x	424	424	424	424	x	424	424	424	424	424	x	x	x
425	1	1	1	1	1	1	1	0	1	1	1	1	1	1	1	1	1	0	0	1	1	1	0	0	0	1	1	0	1	1	1	1		x	425	x	425	425	425	425	x	425	425	425	425	425	x	425	425
426	0	1	0	1	1	1	1	0	1	1	1	1	1	1	1	1	1	0	1	0	1	1	0	1	0	0	1	0	1	1	1	1		x	426	x	426	426	426	426	x	426	426	426	426	426	x	426	426
427	0	1	1	1	1	1	1	0	1	1	1	1	1	1	1	1	1	0	1	0	1	1	0	1	0	1	1	0	1	1	1	1		x	427	x	427	427	427	427	x	427	427	427	427	427	x	427	427
428	1	1	1	1	1	1	1	1	1	1	1	1	1	0	1	1	1	1	1	0	1	1	0	1	1	1	1	0	1	1	1	1		x	428	x	428	428	428	428	x	428	428	428	428	428	x	x	428
429	1	1	0	1	1	1	1	1	1	1	1	1	1	1	1	1	0	0	1	1	1	1	0	1	0	0	1	1	1	1	0	1		x	429	x	429	429	429	429	x	429	429	429	429	429	429	x	429
430	0	1	1	1	1	1	1	0	1	1	1	1	1	1	1	1	1	0	1	1	1	1	1	1	1	1	1	1	1	1	0	1		x	430	x	430	430	430	430	x	430	430	430	430	430	430	x	430
431	0	1	1	1	1	1	1	1	1	1	1	1	1	1	1	1	1	0	0	1	1	1	1	1	0	0	1	1	1	1	0	1		x	431	x	431	431	431	431	431	431	431	x	431	431	431	x	x
432	0	1	1	1	1	1	1	1	1	1	1	1	1	1	0	1	0	0	1	1	1	1	1	1	0	0	1	0	1	1	0	1		x	432	x	432	432	432	432	432	432	432	x	432	432	432	x	x
433	1	1	1	1	1	1	1	1	1	1	1	1	1	1	1	1	1	0	0	1	1	1	0	0	0	0	1	0	1	1	0	1		x	433	x	433	433	433	433	433	433	433	x	433	433	433	433	x
434	0	1	0	1	1	1	1	1	1	1	1	1	1	1	1	1	1	0	1	0	1	1	0	0	0	1	1	1	1	1	0	1		x	434	x	434	434	434	434	434	434	434	x	434	434	434	434	x
435	0	1	0	1	1	1	1	1	1	1	0	1	1	1	1	0	1	0	0	0	1	1	0	1	0	1	1	1	1	1	0	1		x	435	x	435	435	435	435	435	435	435	x	435	435	435	435	x
436	0	1	0	1	1	1	1	1	1	1	0	1	1	1	1	0	1	1	1	0	1	1	0	1	0	1	1	1	1	1	0	1		x	436	x	436	436	436	436	436	436	436	x	436	436	436	436	x
437	0	1	1	1	1	1	1	1	1	1	1	1	1	1	1	0	1	0	0	0	1	1	0	0	0	1	1	1	1	1	0	1		x	437	x	437	437	437	437	437	437	437	437	437	437	437	x	x
438	0	1	1	1	1	1	1	1	1	1	1	1	1	1	1	0	1	0	0	0	1	1	0	0	0	0	1	0	1	1	0	1		x	438	x	438	438	438	438	438	438	438	438	438	438	438	x	x
439	0	1	1	1	1	1	1	1	1	1	1	1	1	1	1	1	1	0	1	0	1	1	0	0	0	0	1	0	1	1	0	1		x	439	x	439	439	439	439	439	439	439	x	439	439	x	x	439
440	1	1	0	1	1	1	1	1	1	1	1	1	1	1	1	1	1	0	1	0	1	1	0	1	0	0	1	1	1	1	0	0		x	440	x	440	440	440	440	440	440	440	x	440	440	x	x	x
441	1	1	0	1	1	1	1	1	1	1	1	1	1	1	0	1	1	0	0	0	1	1	1	1	0	0	1	1	1	1	0	0		x	441	x	441	441	441	441	441	441	441	x	441	441	x	x	x
442	0	1	0	1	1	1	1	1	1	1	1	1	1	1	0	1	1	0	1	0	1	1	1	1	1	0	1	0	1	1	0	0		x	442	x	442	442	442	442	442	442	442	x	442	442	x	x	x
443	0	1	0	1	1	1	1	1	1	1	0	1	1	0	0	1	1	1	0	0	1	1	1	1	1	1	1	1	1	1	1	0		x	443	x	443	443	443	443	443	443	443	x	443	443	x	x	x
444	1	1	1	1	1	1	1	1	1	1	1	1	1	0	1	0	1	1	1	1	1	1	1	1	1	1	1	0	1	1	1	1		x	444	444	444	444	444	444	444	444	444	444	444	444	x	444	x
445	0	1	1	1	1	1	1	1	1	1	1	1	1	0	1	1	1	1	1	1	1	1	1	1	1	1	1	0	1	1	1	1		x	445	445	445	445	445	445	445	445	445	445	445	445	x	445	445
446	1	1	1	1	1	1	1	1	1	1	1	1	1	1	1	1	1	1	1	0	1	1	1	1	1	1	1	0	1	1	1	0		446	446	446	446	446	446	446	446	446	446	446	446	446	446	446	x
447	1	1	1	1	1	1	1	1	1	1	1	1	1	1	1	1	1	1	0	0	1	1	1	1	1	1	1	1	1	1	0	0		x	447	x	447	447	447	447	447	447	447	447	447	447	447	x	x
448	1	1	1	1	1	1	1	1	1	1	1	1	1	1	1	1	1	1	1	0	1	1	1	1	1	1	1	0	1	1	0	0		x	448	x	448	448	448	448	448	448	448	x	448	448	448	x	x
449	1	1	1	1	1	1	1	1	1	1	1	1	1	1	1	1	1	1	0	1	1	1	0	1	1	1	1	0	1	1	0	1		x	449	x	449	449	449	449	449	449	449	x	449	449	449	x	x
450	1	1	1	1	1	1	1	1	1	1	1	1	1	1	1	0	1	1	0	0	1	1	1	1	0	0	1	0	1	1	0	0		x	450	x	450	450	450	450	450	450	450	x	450	450	450	x	x
451	0	1	0	1	1	1	1	1	1	1	1	1	1	1	0	1	1	0	1	0	1	1	1	1	0	0	1	0	1	1	0	0		x	451	x	451	451	451	451	451	451	451	x	451	451	451	x	x
452	0	1	1	1	1	1	1	1	1	1	0	1	1	1	0	1	1	0	0	0	1	1	0	1	0	0	1	0	1	1	0	1		x	452	x	452	452	452	452	452	452	452	x	452	452	452	x	x
453	0	1	1	1	1	1	1	1	1	1	1	1	1	1	0	0	1	0	0	0	1	1	1	0	0	1	1	0	1	1	0	1		x	453	x	453	453	453	453	453	453	453	x	453	453	453	x	x
454	0	1	0	1	1	1	1	1	1	1	1	1	1	1	0	0	1	0	0	0	1	1	1	1	0	0	1	0	1	1	0	1		x	454	x	454	454	454	454	454	454	454	x	454	454	x	x	x
455	0	1	0	1	1	1	1	1	1	1	0	1	1	1	1	0	1	0	1	0	1	1	0	0	0	0	1	0	1	1	1	0		x	455	x	455	455	455	455	455	455	455	x	455	455	x	x	x
456	1	1	1	1	1	1	1	1	1	1	1	1	1	1	0	1	1	0	0	0	1	1	0	1	0	0	1	0	1	1	0	0		x	456	x	456	456	456	456	456	456	456	456	456	456	x	x	456
457	0	1	0	1	1	1	1	1	1	1	1	1	1	1	0	1	1	0	0	1	1	1	0	1	0	0	1	0	1	1	1	1		x	457	x	457	457	457	457	457	457	457	457	457	457	x	x	457
458	1	1	0	1	1	1	1	1	1	1	1	1	1	0	1	1	1	0	1	1	1	1	0	1	0	0	1	0	1	1	1	0		x	458	x	458	458	458	458	458	458	458	458	458	458	x	458	x
459	0	1	1	1	1	1	1	1	1	1	1	1	1	0	1	1	1	0	0	1	1	1	0	1	0	0	1	0	1	1	1	0		x	459	459	459	459	459	459	459	459	459	459	459	459	x	459	x
460	1	1	1	1	1	1	1	1	1	1	1	1	1	1	1	1	1	0	0	1	1	1	0	1	1	0	1	0	1	1	1	0		x	460	460	460	460	460	460	460	460	460	460	460	460	460	x	x
461	1	1	1	1	1	1	1	1	1	1	1	1	1	1	1	1	1	0	0	1	1	1	0	1	0	1	1	0	1	1	1	0		x	461	461	461	461	461	461	461	461	461	461	461	461	461	x	x
462	1	1	1	1	1	1	1	1	1	1	1	1	1	1	1	0	1	1	1	1	1	1	0	1	1	1	1	1	1	1	1	0		x	462	462	462	462	462	462	462	462	462	462	462	462	462	x	x
463	1	1	1	1	1	1	1	1	1	1	1	1	1	1	1	1	1	0	1	1	1	1	0	1	0	0	1	0	1	1	0	0		x	463	463	463	463	463	463	463	x	463	463	463	463	463	x	463
464	0	1	1	1	1	1	1	1	1	1	1	1	1	1	0	1	1	0	1	1	1	1	0	1	0	0	1	0	1	1	0	0		x	464	x	464	464	464	464	464	x	464	464	464	464	464	x	464
465	0	1	1	1	1	1	1	1	1	1	1	1	1	1	0	1	1	0	1	1	1	1	0	1	0	0	1	0	0	1	0	0		x	465	x	465	465	465	465	465	x	465	465	465	465	465	x	x
466	0	1	1	1	1	1	1	1	1	1	1	1	1	1	0	1	1	0	1	1	1	1	0	1	0	0	1	0	1	1	0	0		x	466	x	466	466	466	466	466	x	466	466	466	466	466	x	x
467	0	1	1	1	1	1	1	1	0	1	1	1	1	1	0	1	1	0	0	1	1	1	0	1	0	0	1	1	1	1	0	0		x	467	x	467	467	467	467	467	x	467	467	467	467	467	x	x
468	0	1	0	1	1	1	1	1	1	1	1	1	1	1	0	1	1	0	0	1	1	1	0	1	0	0	1	1	1	1	0	0		x	468	x	468	468	468	468	x	468	468	468	468	468	468	x	x
469	1	1	0	1	1	1	1	1	1	1	1	1	1	1	0	0	1	0	1	1	1	1	0	1	0	0	1	0	1	1	0	1		x	469	x	469	469	469	469	x	469	469	469	469	469	469	x	x
470	0	1	0	1	1	1	1	1	1	1	1	1	1	1	0	1	1	1	1	1	1	1	0	1	0	0	1	0	1	1	0	1		x	470	x	470	470	470	470	x	470	470	470	470	470	470	x	470
471	1	1	1	1	1	1	1	1	1	1	1	1	1	1	0	1	1	0	1	1	1	1	0	1	0	0	1	0	1	1	0	1		x	471	x	471	471	471	471	x	471	471	471	471	471	471	x	471
472	0	1	0	1	1	1	1	0	1	1	1	1	1	1	1	1	1	0	1	1	1	1	0	1	0	0	1	0	1	1	0	1		x	472	x	472	472	472	472	x	472	472	472	472	472	472	472	472
473	0	1	0	1	1	1	1	0	1	1	1	1	1	1	1	1	1	0	1	1	1	1	0	1	0	0	1	0	1	1	0	1		x	473	x	473	473	473	473	x	473	473	473	473	473	473	473	473
474	0	1	0	1	1	1	1	0	1	1	1	1	1	1	1	1	1	1	1	1	1	1	0	1	0	0	1	0	1	1	0	0		x	474	x	474	474	474	474	x	474	474	x	474	474	474	474	474
475	1	1	1	1	1	1	1	0	1	1	1	1	1	1	1	1	1	1	1	1	1	1	0	1	1	0	1	1	1	1	1	1		x	475	x	475	475	475	475	x	475	475	x	475	475	475	475	475
476	1	1	0	1	1	1	1	0	1	1	1	1	1	1	1	1	1	1	1	1	1	1	0	1	1	0	1	0	1	1	0	1		x	476	x	476	476	476	476	x	x	476	x	476	476	x	476	476
477	1	1	0	1	1	1	1	0	1	1	1	1	1	1	1	1	1	1	1	1	1	1	0	1	1	0	1	0	1	1	0	0		x	477	x	477	477	477	477	x	x	477	x	477	477	x	477	x
478	1	1	0	1	1	1	1	0	1	1	0	1	1	1	1	1	1	1	1	1	1	1	0	1	1	0	1	0	1	1	0	0		x	478	x	478	478	478	478	x	x	478	x	478	478	x	x	x
479	0	1	0	1	1	1	1	1	1	1	0	1	1	1	1	1	1	1	1	1	1	1	0	1	1	0	1	0	0	1	0	0		x	479	x	479	479	479	479	x	x	479	x	479	479	x	x	x
480	0	1	0	1	1	1	1	0	0	1	1	1	1	0	1	1	1	0	1	1	1	1	0	1	0	0	1	0	0	0	0	0		x	480	x	480	480	480	480	x	x	480	x	480	480	x	x	x
481	1	1	0	1	1	1	1	1	0	1	0	1	1	0	1	0	1	0	1	1	1	1	0	1	0	0	1	0	0	1	0	0		x	481	x	481	481	481	481	x	x	481	x	481	481	x	x	x
482	1	1	1	1	1	1	1	0	1	1	1	1	1	0	0	1	1	1	1	1	1	1	0	1	0	0	1	0	1	1	0	0		x	482	x	482	482	482	482	x	x	482	x	482	482	x	x	482
483	1	1	1	1	1	1	1	0	1	1	0	1	1	0	0	1	1	0	1	1	1	1	0	1	0	0	1	0	0	1	0	0		x	483	x	483	483	483	483	x	x	483	x	483	483	x	x	483
484	0	1	1	1	1	1	1	0	0	1	0	1	1	0	0	1	1	0	1	1	1	1	0	1	0	0	1	0	0	1	0	0		x	484	x	484	484	484	484	x	x	484	x	484	484	x	x	484
485	0	1	0	1	1	1	1	0	1	1	1	1	1	0	0	1	1	0	1	1	1	1	0	1	0	0	1	1	0	0	0	0		x	485	x	485	485	485	485	x	485	485	485	x	485	x	x	x
486	1	1	0	1	1	1	1	0	1	1	1	1	1	0	0	1	1	0	1	1	1	1	0	1	0	1	1	1	0	1	0	0		x	486	x	486	486	486	486	x	486	486	486	x	486	x	x	x
487	1	1	0	1	1	1	1	0	1	1	1	1	1	1	0	1	1	0	0	1	1	1	0	1	0	0	1	0	1	1	0	0		x	487	x	487	487	487	487	x	487	487	487	x	487	x	x	x
488	0	1	0	1	1	1	1	0	1	1	1	1	1	0	0	1	1	0	1	0	1	1	0	1	0	0	1	0	1	1	0	0		x	488	x	488	488	488	488	x	488	488	488	x	488	x	x	x
489	1	1	0	1	1	1	1	0	1	1	1	0	1	0	1	0	1	0	0	0	1	1	0	1	1	0	1	1	1	1	0	0		489	489	x	489	489	489	489	x	489	489	489	x	489	x	x	x
490	1	1	0	1	1	1	1	1	1	1	1	1	1	0	1	1	1	0	1	1	1	1	0	1	0	0	1	0	1	1	0	1		490	490	x	490	490	490	490	490	490	490	490	490	490	x	x	x
491	1	1	1	1	1	1	1	1	1	1	1	1	1	0	1	0	1	0	1	0	1	1	0	1	0	0	1	1	1	1	0	1		491	491	491	491	491	491	491	491	x	491	491	491	491	x	x	x
492	1	1	1	1	1	1	1	1	1	1	1	1	1	0	1	1	1	0	1	0	1	1	1	1	0	0	1	1	0	1	0	1		492	492	492	492	492	492	492	492	x	492	492	492	492	x	x	492
493	1	1	1	1	1	1	1	1	1	1	1	1	1	0	0	1	1	0	1	0	1	1	0	1	0	0	1	1	1	1	0	1		493	493	x	493	493	493	493	493	x	493	493	493	493	x	x	493
494	1	1	1	1	1	1	1	1	1	1	1	1	1	0	1	1	1	1	1	0	1	1	1	1	0	0	1	0	0	1	0	0		494	494	x	494	494	494	494	494	x	494	494	494	494	x	x	494
495	1	1	1	1	1	1	1	1	0	1	1	1	1	0	0	1	1	0	1	0	1	1	1	1	0	1	1	0	1	1	0	1		495	x	x	495	495	495	495	495	x	495	495	495	495	x	x	495
496	1	1	1	1	1	1	1	1	1	1	1	1	1	0	0	1	1	1	0	0	1	1	0	1	0	0	1	0	0	1	0	1		496	x	x	496	496	496	496	496	496	496	496	496	496	x	x	x
497	1	1	0	1	1	1	1	1	1	1	1	1	1	0	1	1	1	0	1	0	1	1	0	1	0	0	1	0	0	1	0	1		497	x	x	497	497	497	497	497	497	497	497	497	497	x	x	x
498	1	1	0	1	1	1	1	1	1	1	1	1	1	0	0	1	1	0	0	0	1	1	0	1	0	0	1	0	1	1	0	0		498	x	x	498	498	498	498	498	498	498	498	498	498	x	x	x
499	1	0	0	1	1	1	1	1	1	1	1	1	1	0	0	1	1	0	1	0	1	1	0	1	0	0	1	0	0	1	0	1		499	x	x	499	499	499	499	499	499	499	499	499	499	x	x	x
500	1	0	0	1	1	1	1	1	1	1	1	1	1	0	0	0	1	0	1	1	1	1	0	1	0	0	1	0	1	1	1	1		500	x	x	500	500	500	500	500	500	500	500	500	500	x	x	x
501	1	1	0	1	1	1	1	1	1	1	1	1	1	0	1	1	1	1	1	1	1	1	0	0	0	0	1	0	0	1	0	0		501	x	x	501	501	501	501	x	501	501	501	x	501	x	501	501
502	1	1	0	1	1	1	1	1	1	1	1	1	1	0	1	1	1	1	1	1	1	1	0	0	0	0	1	0	0	1	0	1		502	x	x	502	502	502	502	x	502	502	502	x	502	x	x	502
503	1	1	0	1	1	1	1	1	1	1	1	1	1	0	1	1	1	1	1	1	1	1	0	0	0	1	1	0	1	1	1	1		503	x	x	503	503	503	503	x	503	503	503	x	503	x	x	503
504	1	0	0	1	1	1	1	1	1	1	1	1	1	0	1	1	1	1	1	1	1	1	0	0	0	0	1	0	1	1	1	0		504	x	x	504	504	504	504	x	504	504	x	x	504	x	x	504
505	1	1	1	1	1	1	1	0	1	1	1	0	1	0	1	1	1	1	1	1	1	1	0	0	0	1	1	0	1	1	0	0		505	x	505	505	505	505	505	x	505	505	x	x	505	x	x	505
506	1	0	1	1	1	1	1	0	1	1	1	1	1	0	0	1	1	1	1	1	1	1	1	0	1	1	1	1	1	1	1	0		506	x	506	506	506	506	506	x	506	506	x	506	506	x	x	506
507	1	1	1	1	1	1	1	0	1	1	1	1	1	0	0	1	1	1	1	1	1	1	1	0	1	1	1	1	1	1	0	0		507	x	x	507	507	507	507	x	507	507	x	507	507	x	x	507
508	1	1	1	1	1	1	1	0	1	1	0	1	1	0	0	1	1	1	1	1	1	1	1	1	0	1	1	1	1	1	0	0		508	x	x	508	508	508	508	x	508	508	x	508	508	x	x	508
509	1	1	1	1	1	1	1	0	1	1	0	1	1	0	0	1	1	1	1	1	1	1	0	1	1	1	1	0	1	1	0	0		509	x	x	509	509	509	509	x	509	509	x	509	509	x	x	509
510	1	1	1	1	1	1	1	0	1	1	1	1	1	0	0	1	1	1	0	1	1	1	1	1	1	1	1	0	1	1	0	0		510	x	x	510	510	510	510	x	510	510	x	510	510	x	x	510
511	1	0	0	1	1	1	1	1	1	1	0	1	1	0	0	1	1	1	0	1	1	1	0	1	1	1	1	0	1	1	1	0		511	x	x	511	511	511	511	x	511	511	x	511	511	x	x	511
512	1	0	0	1	1	1	1	0	1	1	0	1	1	1	0	1	1	1	0	1	1	1	0	0	1	1	1	0	1	1	0	0		512	x	x	512	512	512	512	x	512	512	x	512	512	512	x	512
513	1	1	1	1	1	1	1	0	1	1	0	1	1	1	1	1	1	1	0	1	1	1	0	0	0	1	1	0	1	1	0	0		513	x	x	513	513	513	513	x	513	513	x	513	513	513	x	513
514	1	1	0	1	1	1	1	0	1	1	0	1	1	1	1	1	1	1	0	1	1	1	0	0	0	1	1	0	1	1	0	0		514	x	x	514	514	514	514	x	514	514	x	514	514	514	x	514
515	1	0	1	1	1	1	1	0	1	1	0	1	1	1	0	1	1	0	0	1	1	1	0	1	0	1	1	0	1	1	0	0		515	x	515	515	515	515	515	x	515	515	x	515	515	515	x	515
516	1	0	1	1	1	1	1	0	1	1	1	1	1	1	0	1	1	0	0	1	1	1	0	0	0	1	1	0	1	1	0	0		516	x	516	516	516	516	516	x	516	516	x	x	516	516	x	516
517	1	0	1	1	1	1	1	1	1	1	1	1	1	1	0	1	1	0	0	1	1	1	0	1	0	1	1	0	1	1	0	0		517	x	517	517	517	517	517	x	517	517	x	x	517	517	x	517
518	1	1	1	1	1	1	1	0	1	1	1	1	1	1	1	1	1	0	0	1	1	1	0	1	0	1	1	0	1	1	1	1		518	x	518	518	518	518	518	x	518	518	x	x	518	518	518	518
519	1	1	1	1	1	1	1	0	1	1	0	1	1	1	1	1	1	0	0	1	1	0	1	1	0	1	1	0	1	1	0	1		519	x	519	519	519	519	519	x	519	519	x	x	519	519	x	519
520	1	1	1	1	1	1	1	0	1	1	1	0	1	1	1	1	1	0	0	1	1	0	0	0	0	1	1	0	1	1	0	1		520	x	x	520	520	520	520	x	520	520	520	x	520	520	x	520
521	1	1	1	1	1	1	1	0	1	1	1	1	1	1	1	1	1	0	0	1	1	1	0	0	0	1	1	0	1	1	1	1		521	x	x	521	521	521	521	x	521	521	521	521	521	521	x	521
522	1	0	1	1	1	1	1	0	1	1	1	1	1	1	1	1	1	0	0	1	1	1	1	1	0	1	1	1	0	1	0	1		x	x	x	522	522	522	522	x	522	522	522	522	522	522	x	522
523	1	1	1	1	1	1	1	0	1	1	1	1	1	1	0	1	1	0	0	1	1	1	0	1	1	1	1	1	1	1	0	1		x	x	x	523	523	523	523	x	523	523	x	523	523	523	x	523
524	1	1	0	1	1	1	1	0	1	1	1	1	1	1	1	1	1	0	0	1	1	1	0	1	0	1	1	1	1	1	0	1		x	x	x	524	524	524	524	x	524	524	x	524	524	524	x	524
525	1	1	0	1	1	1	1	0	1	1	1	1	1	1	0	1	1	0	0	1	1	1	0	1	0	1	1	1	0	1	0	1		x	x	x	525	525	525	525	x	525	525	x	525	525	525	x	525
526	0	1	0	1	1	1	1	0	1	1	1	1	1	1	1	1	1	0	0	1	1	1	0	1	0	1	1	0	1	1	0	1		x	x	x	526	526	526	526	x	526	526	x	526	526	526	x	526
527	0	0	1	1	1	1	1	0	1	1	0	1	1	1	0	1	1	0	0	0	0	1	0	1	0	1	1	0	0	1	0	1		x	x	x	527	527	527	527	x	x	527	x	527	527	527	x	527
528	1	1	1	1	1	1	1	1	1	1	0	1	1	1	0	1	1	0	0	0	1	1	0	1	0	1	1	0	0	1	0	0		x	528	x	528	528	528	528	x	x	528	x	528	528	528	x	528
529	0	1	1	1	1	1	1	0	1	1	1	1	1	1	0	1	1	1	0	0	1	1	0	1	0	1	1	0	1	1	0	0		x	529	x	529	529	529	529	x	x	529	529	529	529	529	x	529
530	0	1	1	1	1	1	1	0	1	1	1	1	1	1	0	1	1	0	0	0	0	1	0	1	0	1	1	0	1	1	0	0		x	530	x	530	530	530	530	x	x	530	530	x	530	530	x	530
531	1	1	0	1	1	1	1	0	0	1	1	1	1	1	0	1	1	0	0	0	1	1	0	1	0	1	1	0	1	1	0	0		x	531	x	531	531	531	531	x	x	531	531	x	531	531	x	531
532	0	1	0	1	1	1	1	0	1	1	1	1	1	1	0	1	1	0	0	0	1	1	0	1	0	1	1	0	1	1	0	0		x	532	x	532	532	532	532	x	532	532	532	x	532	532	x	532
533	1	1	0	1	1	1	1	0	1	1	1	1	1	1	1	1	1	0	0	0	0	1	0	1	0	1	1	0	0	1	0	0		533	533	x	533	533	533	533	x	533	533	533	x	533	533	x	533
534	1	1	0	1	1	1	1	0	1	1	1	0	1	1	0	1	1	0	0	0	0	1	0	1	0	1	1	0	1	1	0	0		534	534	x	534	534	534	534	x	534	534	534	x	534	534	x	534
535	1	1	1	1	1	1	1	0	1	1	1	0	1	1	0	1	1	0	0	0	0	1	0	1	0	1	1	1	1	1	0	1		535	535	x	535	535	535	535	x	535	535	535	x	535	535	x	535
536	1	1	1	1	1	1	1	0	1	1	1	1	1	1	1	1	1	0	0	0	0	1	0	1	0	1	1	1	1	1	0	1		536	536	x	536	536	536	536	x	536	536	536	536	536	536	536	536
537	1	1	1	1	1	1	1	0	1	1	1	1	1	1	1	1	1	0	0	1	0	1	0	1	0	1	1	1	1	1	0	1		537	537	x	537	537	537	537	x	537	537	537	537	537	x	x	537
538	1	1	1	1	1	1	1	0	1	1	1	1	1	1	1	1	1	0	0	1	0	1	0	1	1	1	1	1	1	1	0	1		x	538	x	538	538	538	538	x	538	538	538	x	538	x	x	538
539	1	1	0	1	1	1	1	0	1	1	1	1	1	1	1	1	1	0	0	0	0	1	1	1	0	1	1	1	1	1	0	1		x	539	x	539	539	539	539	x	539	539	539	x	539	x	x	539
540	1	1	0	1	1	1	1	0	1	1	1	1	1	1	1	1	1	1	0	0	0	1	0	1	0	1	1	1	1	1	0	1		x	540	x	540	540	540	540	x	x	540	540	x	540	x	x	540
541	1	1	0	1	1	1	1	0	1	1	1	1	1	0	0	1	1	1	0	1	0	1	0	1	0	1	1	0	1	1	0	1		x	541	x	541	541	541	541	x	x	541	541	x	541	x	x	541
542	0	1	0	1	1	1	1	1	1	1	1	0	1	0	0	1	1	1	0	1	0	1	0	0	0	1	1	0	1	1	0	1		x	542	x	542	542	542	542	x	x	542	542	x	542	x	x	542
543	1	1	0	1	1	1	1	1	1	1	1	1	1	0	0	1	1	0	0	0	0	1	1	0	0	1	1	0	1	1	0	1		x	543	x	543	543	543	543	x	x	543	543	x	543	x	x	543
544	1	1	0	1	1	1	1	1	0	1	1	1	1	0	0	1	1	0	0	1	1	1	0	0	0	1	1	1	1	1	0	1		x	544	x	544	544	544	544	x	x	544	544	x	544	x	x	544
545	0	1	0	1	1	1	1	0	0	1	1	1	1	0	0	1	1	0	0	1	1	1	0	0	0	1	1	0	1	1	0	0		x	545	x	545	545	545	545	x	x	545	545	x	545	x	x	545
546	0	1	0	1	1	1	1	0	1	1	1	1	1	0	1	1	1	0	0	1	1	1	0	0	0	1	1	0	1	1	0	0		x	546	x	546	546	546	546	x	x	546	546	x	546	x	x	546
547	1	1	0	1	1	1	1	0	0	1	1	0	1	0	1	1	1	0	0	1	1	1	0	0	0	1	1	1	1	1	0	0		x	547	x	547	547	547	547	x	x	547	547	x	547	x	x	547
548	1	1	0	1	1	1	1	0	1	1	1	1	1	0	1	1	1	1	0	1	0	1	0	0	0	1	1	0	1	1	0	0		x	548	x	548	548	548	548	x	x	548	548	548	548	x	x	548
549	0	1	0	1	1	1	1	0	1	1	1	1	1	0	1	1	1	1	0	1	1	1	0	1	0	1	1	0	1	1	1	0		x	549	x	549	549	549	549	x	x	549	549	549	549	x	x	549
550	1	1	0	1	1	1	1	0	0	1	1	1	1	0	0	1	1	1	0	1	1	1	0	0	0	1	1	0	1	1	1	0		550	550	x	550	550	550	550	x	x	550	550	550	550	x	x	550
551	1	1	1	1	1	1	1	0	1	1	1	1	1	1	0	1	1	1	0	1	1	1	0	0	0	1	1	1	1	1	1	0		551	551	551	551	551	551	551	x	551	551	551	551	551	551	x	551
552	1	1	1	1	1	1	1	0	1	1	1	1	1	1	1	1	1	1	0	1	1	1	0	0	0	1	1	0	0	1	1	0		552	552	552	552	552	552	552	x	552	552	552	552	552	552	x	552
553	1	1	1	1	1	1	1	0	1	1	1	1	1	1	1	1	1	1	0	1	1	1	1	0	0	1	1	0	0	1	1	0		553	x	553	553	553	553	553	x	553	553	553	553	553	553	x	553
554	1	1	1	1	1	1	1	0	1	1	1	1	1	1	0	1	1	0	0	1	1	1	0	1	0	1	1	0	1	1	0	0		554	x	554	554	554	554	554	x	x	554	554	554	554	554	x	554
555	1	1	1	1	1	1	1	0	1	1	1	1	1	1	1	1	1	0	0	1	1	1	0	0	0	1	1	0	0	1	0	0		555	x	555	555	555	555	555	x	x	555	555	555	555	555	x	555
556	1	1	1	1	1	1	1	0	1	1	1	1	1	1	0	1	1	0	0	1	1	1	0	0	0	1	1	0	0	1	0	0		x	x	556	556	556	556	556	x	x	556	556	556	556	556	x	556
557	1	0	1	1	1	1	1	0	1	1	1	1	1	1	0	1	1	0	0	1	1	1	0	0	0	1	1	0	0	1	0	0		x	x	557	557	557	557	557	x	x	557	557	557	557	x	x	557
558	1	0	1	1	1	1	1	0	0	1	1	1	1	1	0	1	1	1	0	1	1	1	0	0	0	1	1	0	0	1	0	0		x	x	x	558	558	558	558	x	x	558	558	558	558	x	x	558
559	1	0	1	1	1	1	1	0	1	1	1	1	1	1	0	1	1	0	0	1	1	1	1	0	0	1	1	0	0	1	0	0		x	x	x	559	559	559	559	x	559	559	559	559	559	x	x	559
560	0	1	1	1	1	1	1	0	1	1	1	1	1	1	0	1	1	0	0	1	1	1	0	1	0	1	1	0	0	1	0	0		x	560	x	560	560	560	560	x	560	560	560	560	560	x	x	560
561	1	1	1	1	1	1	1	0	1	1	1	1	1	0	0	1	1	1	0	1	1	1	0	1	0	1	1	0	0	1	0	0		x	x	x	561	561	561	561	x	561	561	561	561	561	x	x	561
562	0	1	0	1	1	1	1	0	1	1	1	1	1	1	1	1	1	1	0	1	1	1	0	0	0	1	1	0	0	1	0	0		x	x	x	562	562	562	562	x	562	562	562	562	562	562	x	562
563	0	1	0	1	1	1	1	0	1	1	1	1	1	1	1	1	1	0	0	1	1	1	0	0	0	1	1	0	0	1	1	0		x	x	x	563	563	563	563	x	563	563	563	563	563	563	x	563
564	1	1	0	1	1	1	1	0	1	1	1	1	1	1	1	1	1	0	0	1	1	1	0	0	0	1	1	0	0	1	0	0		x	x	x	564	564	564	564	x	564	564	564	564	564	564	x	564
565	1	0	0	1	1	1	1	0	1	1	1	1	1	1	1	1	1	0	0	1	1	1	0	0	0	1	1	0	0	1	0	0		x	x	x	565	565	565	565	x	565	565	565	565	565	565	x	565
566	1	1	0	1	1	1	1	0	1	1	1	1	1	1	0	1	1	0	0	1	1	1	0	0	0	1	1	0	0	1	1	0		x	x	x	566	566	566	566	x	566	566	566	566	566	566	x	566
567	0	1	1	1	1	1	1	0	1	1	1	1	1	1	0	1	1	0	0	1	1	1	0	0	0	1	1	0	0	1	0	0		x	x	x	567	567	567	567	x	567	567	567	567	567	567	x	567
568	1	1	1	1	1	1	1	0	1	1	1	1	1	1	0	1	1	0	0	1	1	1	0	0	0	1	1	0	1	1	0	1		x	x	x	568	568	568	568	x	568	568	568	568	568	568	x	568
569	0	1	0	1	1	1	1	0	1	1	1	1	1	1	0	1	1	0	0	1	1	1	0	0	0	1	1	0	0	1	0	0		x	x	x	569	x	569	569	x	569	569	569	569	569	569	x	569
570	1	0	0	1	1	1	1	1	1	1	1	1	1	1	0	1	1	1	0	1	1	1	0	1	0	1	1	0	0	1	0	0		570	x	x	570	x	570	570	x	570	570	570	570	570	570	x	x
571	1	0	1	1	1	1	1	0	1	1	1	1	1	1	1	1	1	1	0	1	1	1	1	0	1	1	1	0	0	1	0	0		571	x	x	571	x	571	571	x	571	571	571	571	571	571	x	x
572	1	1	0	1	1	1	1	0	1	1	1	1	1	1	0	1	1	0	0	1	1	1	0	1	1	1	1	0	0	1	0	0		572	x	x	572	x	572	572	x	572	572	x	572	572	572	x	x
573	1	1	0	1	0	1	1	0	1	1	1	1	1	1	0	1	1	0	0	1	1	1	0	0	1	1	0	0	0	1	1	0		573	x	x	573	x	573	573	x	573	573	x	573	573	573	x	x
574	1	1	0	1	1	1	1	0	1	1	1	1	1	1	1	0	1	0	0	1	1	0	0	0	0	1	0	0	0	1	0	0		574	x	x	574	574	574	574	x	574	574	x	574	574	574	x	x
575	1	0	0	1	1	1	1	0	1	1	1	1	1	1	0	0	1	1	0	1	1	0	0	0	0	1	1	0	0	1	0	0		575	x	x	575	575	575	575	x	575	575	x	575	575	575	x	x
576	1	0	0	1	1	1	1	0	1	1	0	1	1	1	0	1	1	0	0	1	1	0	0	0	0	1	0	0	0	1	0	0		576	x	x	576	576	576	576	x	576	576	x	576	576	576	x	576
577	1	0	1	1	1	1	1	0	1	1	0	1	1	1	1	1	1	0	0	1	1	0	0	0	0	1	1	0	1	1	0	0		577	x	x	577	577	577	577	x	577	577	x	577	577	577	x	577
578	1	0	1	1	1	1	1	0	1	1	0	1	1	1	0	1	1	0	0	1	1	0	0	0	0	1	0	0	0	1	0	0		578	x	x	578	578	578	578	x	578	578	x	578	578	578	x	578
579	1	1	0	1	1	1	1	0	1	1	1	1	1	1	1	1	1	0	0	1	1	0	0	0	0	1	0	0	0	1	0	0		579	579	x	579	579	579	579	x	579	579	x	579	579	579	x	579
580	1	1	1	1	1	1	1	0	1	1	1	1	1	1	0	1	1	0	0	1	1	0	0	0	0	1	0	0	0	1	1	0		580	580	x	580	580	580	580	x	580	580	x	580	580	580	x	580
581	1	1	0	1	1	1	1	0	1	1	1	1	1	1	1	1	1	1	0	1	1	0	0	0	0	1	1	0	0	1	1	1		581	581	x	581	581	581	581	x	x	581	x	581	581	581	x	581
582	1	1	0	1	1	1	1	1	1	1	1	1	1	1	1	1	1	1	0	1	1	0	0	1	0	1	1	1	0	1	0	1		582	582	x	582	582	582	582	582	x	582	x	582	582	582	x	582
583	1	1	1	1	1	1	1	1	1	1	0	1	1	1	0	1	1	0	0	1	1	0	0	1	0	1	1	1	0	1	0	1		x	583	x	583	583	583	583	x	x	583	x	583	583	583	x	x
584	1	1	1	1	1	1	1	1	1	1	0	1	1	1	0	1	1	0	0	1	1	0	1	0	0	1	1	0	0	1	0	1		x	584	x	584	584	584	584	x	x	584	x	584	584	584	x	x
585	1	1	1	1	1	1	1	1	0	1	1	1	1	1	0	1	1	1	0	1	1	0	0	1	0	1	1	0	0	1	1	1		x	585	x	x	585	x	585	x	x	585	x	585	585	585	x	x
586	1	1	0	1	1	1	1	1	1	1	0	1	1	1	0	1	1	0	0	1	1	0	0	0	0	1	1	0	0	1	1	1		x	x	x	x	586	x	586	x	x	586	x	586	586	586	x	x
587	0	1	0	1	1	1	1	0	0	1	0	1	1	1	0	0	1	0	0	1	1	0	0	1	0	1	1	0	0	1	1	1		x	x	x	x	587	x	587	x	x	587	x	587	587	587	x	x
588	0	1	0	1	1	1	1	0	0	1	1	1	1	1	0	0	1	0	0	1	1	0	0	0	0	1	1	0	1	1	0	1		x	x	x	x	588	x	588	x	x	588	588	588	588	588	x	x
589	0	1	0	0	1	0	1	0	0	1	1	1	1	1	1	0	1	0	0	0	1	0	0	1	0	1	1	0	0	1	1	0		x	x	x	x	589	x	589	x	x	589	589	589	589	589	x	x
590	0	0	0	1	1	1	1	0	1	1	1	1	1	1	0	0	1	0	0	0	1	0	0	0	0	1	1	1	0	1	0	0		x	x	x	x	590	x	590	x	x	590	590	590	590	590	x	x
591	1	0	1	1	1	0	1	0	0	1	1	1	1	1	0	0	1	0	0	0	1	0	0	0	0	1	1	0	0	1	0	0		x	x	x	x	591	x	591	x	x	591	591	591	591	591	x	x
592	1	0	0	1	1	0	1	0	0	1	1	1	1	1	0	0	1	0	0	0	1	0	0	0	0	1	1	0	0	1	1	0		x	x	x	x	592	x	592	x	x	592	592	592	592	592	x	x
593	1	0	0	1	1	0	1	0	0	1	1	1	1	1	0	0	0	0	0	0	1	0	0	0	0	1	1	0	0	1	0	0		x	x	x	x	593	x	593	x	x	593	593	593	593	593	x	x
594	0	0	0	0	1	0	1	0	0	1	1	1	1	1	0	0	1	0	0	0	1	0	0	0	0	1	1	0	0	1	1	0		x	x	x	x	594	x	594	x	x	594	594	594	594	594	x	x
595	0	0	0	1	1	0	1	0	0	1	1	1	1	1	0	0	1	0	0	0	1	0	0	1	0	1	1	0	0	1	0	0		x	x	x	x	595	x	595	x	x	595	595	595	595	595	x	x
596	0	0	0	1	1	0	1	0	0	1	1	1	1	1	0	0	1	0	0	0	1	0	1	0	0	1	1	0	0	1	1	0		x	x	x	x	596	x	596	x	x	596	596	596	596	596	x	x
597	0	1	1	0	1	0	1	0	0	1	1	1	1	1	1	0	1	0	0	1	1	0	1	0	0	1	1	0	1	1	0	0		x	x	x	x	597	x	597	x	x	597	597	597	597	597	x	x
598	1	1	1	1	1	0	1	1	0	1	1	1	1	1	0	0	1	0	0	1	1	0	1	1	0	1	1	0	1	1	1	0		x	x	x	x	x	x	598	x	x	598	598	598	598	x	x	x
599	1	1	1	1	1	0	1	0	1	1	1	1	1	1	0	0	1	0	0	1	1	0	1	1	0	1	1	1	1	1	0	0		x	x	x	x	x	x	599	x	x	599	599	599	599	x	x	x
600	1	0	0	0	1	1	1	0	1	1	1	1	1	1	0	0	1	0	1	1	1	0	0	1	0	1	1	0	1	1	0	0		x	x	x	x	x	x	600	x	x	600	600	600	600	x	x	x
601	0	1	0	1	1	1	1	1	1	1	1	1	1	1	0	0	1	0	0	0	1	0	0	1	0	1	0	0	1	1	0	0		x	x	x	x	x	x	601	x	x	601	601	601	601	x	x	x
602	0	0	0	1	0	0	1	0	0	1	1	1	1	0	1	0	1	0	0	0	1	0	0	0	0	1	0	0	0	0	0	0		x	x	x	x	x	x	602	x	x	602	602	602	602	x	x	x
603	1	0	1	0	0	0	1	0	1	1	1	1	1	0	0	0	1	0	0	0	1	0	0	0	0	1	0	0	0	1	0	0		x	x	x	x	x	x	603	x	603	603	603	603	603	x	x	x
604	0	0	0	0	1	0	1	0	1	1	1	1	1	0	0	0	1	0	0	0	1	0	0	0	0	1	0	0	0	1	0	0		x	x	x	x	x	x	604	x	x	604	604	604	604	x	x	x
605	1	1	0	1	0	0	1	0	1	1	1	1	1	0	0	0	1	0	0	0	1	0	0	0	0	1	0	0	0	1	0	1		x	x	x	x	x	x	605	x	x	605	605	605	605	x	x	x
606	0	0	0	1	0	0	1	0	1	1	1	1	1	0	0	1	1	0	0	0	1	0	0	0	0	0	0	0	0	0	0	0		x	x	x	x	x	x	606	x	x	606	606	606	606	x	x	x
607	0	1	0	0	0	0	1	0	1	1	1	1	1	0	0	0	1	1	0	0	1	0	0	0	0	0	0	0	0	0	0	0		x	x	x	x	x	x	607	x	x	607	607	607	607	x	x	x
608	1	0	0	0	0	0	1	0	0	1	1	1	1	0	0	0	1	1	0	0	1	0	0	0	0	0	0	0	1	1	0	0		x	x	x	x	x	x	608	x	x	608	608	608	608	x	x	x
609	1	1	0	1	0	0	1	0	1	1	1	1	1	0	0	0	1	0	0	0	1	0	0	0	0	0	0	0	0	1	0	0		x	609	x	x	x	x	609	x	x	609	609	609	609	x	x	x
610	0	1	0	1	0	1	1	0	1	1	1	1	1	0	0	0	1	0	0	1	1	0	0	0	0	0	0	0	0	1	1	0		x	610	x	x	x	610	610	x	x	610	610	610	610	x	x	x
611	0	1	1	0	0	1	1	0	1	1	1	1	1	0	0	0	1	0	0	0	1	0	0	0	0	0	0	0	0	1	0	0		x	611	x	x	x	611	611	x	x	611	611	611	611	x	x	x
612	0	1	1	0	1	1	1	0	0	1	1	1	1	0	0	0	1	0	0	1	1	0	0	1	0	0	0	0	0	0	0	0		x	x	x	x	x	612	612	x	x	612	612	612	612	x	x	x
613	1	1	1	0	0	1	1	0	1	1	1	1	1	0	1	0	1	0	0	1	1	0	0	0	0	0	0	0	1	0	0	0		613	x	x	x	x	x	613	x	x	613	613	613	x	x	x	x
614	1	1	0	1	0	1	1	1	1	1	1	1	1	1	1	1	1	0	0	1	1	0	1	0	0	0	0	0	1	0	1	0		x	x	x	x	x	x	614	x	x	614	614	614	x	614	x	x
615	1	1	1	1	0	1	1	0	1	1	1	1	1	1	0	0	1	1	0	0	1	0	0	1	0	0	0	0	0	0	0	1		x	x	x	x	x	x	615	x	x	615	615	615	x	615	x	x
616	1	0	0	0	0	1	1	0	1	1	1	1	1	1	0	0	1	0	0	0	1	0	0	1	0	0	0	0	0	0	0	0		x	x	x	x	x	x	616	x	x	616	616	616	x	616	x	x
617	1	0	1	1	0	0	1	1	0	1	1	1	0	1	0	0	1	0	0	0	1	0	0	1	0	0	0	0	0	0	0	1		x	x	x	x	x	x	617	x	x	617	617	617	x	617	x	x
618	0	0	0	0	0	1	1	0	0	1	1	1	1	1	1	0	1	1	0	0	0	0	0	0	0	0	0	0	1	0	0	0		x	x	x	x	x	618	618	x	x	618	618	618	618	618	x	x
619	0	0	0	1	0	1	1	0	0	1	1	1	1	1	0	0	1	1	0	0	0	0	0	0	0	0	0	0	0	0	0	0		x	x	x	x	x	x	619	x	x	619	619	619	619	619	x	x
620	1	0	0	0	0	1	1	0	0	1	1	1	1	1	0	0	1	0	0	0	0	0	0	0	0	0	0	0	0	0	0	0		x	x	x	x	x	x	620	x	x	620	620	620	x	620	x	x
621	0	1	0	1	0	1	1	0	0	1	1	1	1	1	0	0	1	0	0	0	0	0	0	1	0	0	0	0	0	0	0	0		x	621	x	x	x	x	621	x	x	621	621	621	x	621	x	x
622	1	1	0	1	0	1	1	0	0	1	1	1	1	1	0	0	1	0	0	0	0	0	0	0	1	0	0	0	0	0	0	0		x	622	x	x	x	x	622	x	x	622	x	622	x	622	x	x
623	1	1	0	0	0	0	1	0	0	1	1	1	1	1	0	1	1	0	0	0	0	0	0	0	1	0	0	0	1	0	0	0		x	x	x	x	x	x	623	x	x	623	x	623	x	x	x	623
624	1	1	0	1	0	1	1	0	0	1	1	1	0	1	0	1	1	0	0	1	0	0	0	0	1	0	0	0	0	0	0	0		x	x	x	x	x	x	624	x	x	624	x	624	x	x	x	624
625	1	1	0	0	0	1	1	0	0	1	1	1	1	1	0	1	1	0	0	1	0	0	0	0	1	0	0	0	0	0	0	0		x	x	x	x	x	x	625	x	x	625	x	625	x	x	x	625
626	0	1	0	1	0	1	1	0	0	1	0	1	0	1	0	1	1	0	0	0	0	0	0	0	1	0	0	0	0	0	0	0		x	x	x	x	x	x	626	x	x	626	x	626	x	x	x	x
627	0	0	0	0	0	0	1	0	0	1	0	1	0	0	1	1	1	0	0	0	0	0	0	0	1	0	0	0	1	1	0	0		x	x	x	x	x	x	627	x	x	627	x	627	x	x	x	x
628	0	1	1	1	0	1	1	1	0	1	0	1	1	1	0	1	1	1	0	0	0	0	0	0	1	1	0	0	1	0	0	0		x	x	x	x	x	628	628	x	x	628	x	x	628	x	x	x
629	0	1	1	0	0	1	1	0	0	1	0	1	1	0	0	1	1	0	0	0	0	0	0	0	1	1	0	1	1	0	0	0		x	x	x	x	x	629	629	x	x	629	x	x	629	x	x	x
630	0	1	0	0	0	1	1	0	0	1	0	1	1	0	1	0	1	0	0	0	0	1	0	1	1	0	0	1	0	0	1	0		x	x	x	x	x	630	x	x	x	630	x	x	630	x	630	x
631	0	0	0	1	0	1	1	0	0	1	0	1	1	1	1	0	1	0	0	0	0	0	0	1	1	0	0	1	0	0	0	0		x	x	x	x	x	x	x	x	x	631	x	x	631	x	x	x
632	0	0	0	1	0	1	1	0	0	1	0	0	1	1	1	0	1	0	0	0	0	0	0	1	1	0	0	1	0	0	0	0		x	x	x	x	x	x	x	x	x	x	x	x	632	x	x	x
633	0	0	1	1	0	1	1	0	1	1	0	0	1	1	1	0	1	1	0	0	0	0	0	0	0	0	0	1	0	0	0	0		x	x	x	x	x	x	x	x	x	x	x	x	633	x	x	x
634	0	0	1	0	0	1	0	0	1	1	0	1	1	0	1	1	1	0	0	0	0	0	0	0	0	0	0	1	0	0	0	1		x	x	x	x	x	x	x	x	x	x	x	x	634	x	x	x
635	0	0	0	1	0	0	1	0	0	1	0	1	1	0	0	0	1	0	0	0	0	0	0	0	0	0	0	1	0	0	0	0		x	x	x	x	x	x	635	x	x	x	x	x	635	x	x	x
636	0	0	0	1	0	0	1	0	0	0	0	0	1	0	0	0	1	0	0	0	0	0	0	0	0	0	0	1	0	0	0	0		x	x	x	x	x	x	636	x	x	x	x	x	636	x	x	x
637	0	0	0	1	0	1	1	0	0	0	0	1	1	0	0	0	1	0	0	0	0	0	0	0	0	0	0	1	0	0	0	0		x	x	x	x	x	x	637	x	x	x	x	x	637	x	x	x
638	0	0	0	0	1	0	1	0	0	0	0	0	1	0	0	0	1	0	0	0	0	0	0	0	0	0	0	0	0	0	0	0		x	x	x	x	638	x	638	x	x	x	x	x	638	x	x	x
639	1	0	0	0	1	0	1	0	0	1	0	1	1	0	0	0	0	0	0	0	0	0	0	0	0	0	0	0	0	0	0	0		x	x	x	x	639	x	639	x	x	x	x	x	639	x	x	x
640	0	0	0	1	1	1	1	0	1	0	0	1	1	0	0	0	0	0	0	0	0	0	0	0	0	0	0	0	0	0	0	0		x	x	x	x	640	640	640	x	x	x	x	x	640	x	x	x
641	0	0	0	1	1	1	1	0	0	0	0	0	1	0	0	0	0	0	0	0	0	0	0	1	0	0	0	0	0	0	0	0		x	x	x	x	x	641	641	x	x	x	x	x	641	x	x	x
642	0	0	0	0	1	1	1	0	0	0	0	0	1	0	0	0	1	0	0	0	1	0	0	1	0	0	0	0	0	0	0	0		x	x	x	x	x	x	642	x	x	x	x	x	642	x	x	x
643	0	1	0	0	1	1	1	1	1	0	0	0	1	1	0	0	1	0	0	0	1	0	0	0	0	1	0	0	0	0	0	0		x	x	x	x	x	x	643	x	x	x	x	x	643	x	x	x
644	1	1	1	0	1	1	1	1	0	0	0	1	1	0	0	0	1	1	0	0	1	0	0	0	0	0	0	0	1	0	0	1		644	x	x	x	x	x	644	x	x	x	x	x	644	x	x	x
645	1	0	1	1	0	1	1	1	1	0	1	1	1	1	0	0	0	0	0	0	1	0	0	0	0	0	0	0	0	0	1	0		645	x	x	x	x	x	645	x	x	x	x	x	645	x	x	x
646	1	0	1	0	0	0	1	0	0	1	0	0	1	0	0	0	0	0	0	0	0	0	0	1	0	1	1	0	0	0	1	0		646	x	x	x	x	x	646	x	x	646	x	x	x	x	x	x
647	1	0	1	1	0	0	1	0	1	1	1	1	1	0	0	0	0	0	0	0	0	0	0	1	0	0	0	0	0	0	1	0		x	x	x	x	x	x	647	x	x	x	x	x	x	x	x	x
648	1	0	0	1	0	0	1	0	1	1	0	0	1	1	0	0	0	1	0	0	0	0	1	0	0	0	0	0	0	0	0	0		x	x	x	x	x	x	648	x	x	x	x	x	x	x	x	x
649	1	0	0	1	0	0	1	0	0	1	0	1	1	0	0	0	0	0	0	0	0	0	0	0	0	0	0	0	0	0	0	0		x	x	x	x	x	x	649	x	x	x	x	x	x	x	x	x
650	1	0	0	1	0	0	1	0	0	1	0	1	0	1	0	0	0	0	0	0	0	0	0	0	0	0	1	0	0	0	0	0		x	x	x	x	x	x	650	x	x	x	x	x	x	x	x	x
651	0	0	0	0	0	0	1	0	0	0	0	0	1	0	0	0	0	0	0	0	0	0	0	1	0	0	0	0	0	0	0	1		x	x	x	x	x	x	651	x	x	x	x	x	x	x	x	x
652	0	1	0	0	0	0	1	0	0	0	0	1	1	1	0	0	0	0	0	0	0	0	0	0	0	0	0	0	0	0	0	1		x	x	x	x	x	x	652	x	x	x	x	x	x	x	x	x
653	0	0	0	0	0	0	1	0	0	0	0	0	1	0	0	0	0	0	0	0	0	0	0	0	0	0	0	0	0	0	0	1		x	x	x	x	x	x	653	x	x	x	x	x	x	x	x	x
654	0	0	0	0	0	0	1	0	1	0	0	0	0	1	0	0	0	0	0	0	0	0	0	0	0	0	0	0	0	0	0	0		x	x	x	x	x	x	654	x	654	x	x	x	x	654	x	x
655	1	0	1	0	0	0	1	0	1	0	0	0	0	1	0	1	0	0	0	0	0	0	0	0	0	1	0	0	0	0	0	0		x	x	x	x	x	x	655	x	655	x	x	x	x	655	x	x
656	0	1	0	0	0	1	1	1	1	0	0	1	0	1	0	0	0	1	0	0	0	0	0	0	0	0	0	0	0	0	0	0		x	x	x	x	x	x	656	x	656	x	x	656	x	656	x	x
657	1	0	0	0	0	1	1	0	1	1	0	1	1	1	0	0	0	0	0	0	0	0	0	0	0	0	0	0	0	0	0	0		657	x	x	x	x	x	657	x	657	657	x	657	x	657	x	x
658	1	1	1	0	1	0	1	0	1	1	0	1	1	1	0	0	0	1	0	0	0	0	0	1	0	0	0	0	1	0	0	0		658	x	x	x	x	x	658	x	658	x	x	658	x	x	x	x
659	1	0	0	0	0	0	1	0	1	1	0	1	1	1	0	1	0	0	0	0	0	0	0	1	0	0	0	0	0	0	0	0		x	x	x	x	x	x	659	x	659	x	x	659	x	x	x	x
660	1	0	0	1	0	0	1	1	1	1	0	1	1	1	0	0	0	0	0	0	0	0	0	0	0	0	0	0	0	0	0	0		x	x	x	x	x	x	660	x	x	x	x	x	x	x	x	x
661	1	0	0	1	0	0	1	0	1	1	1	1	0	1	1	0	0	1	0	0	0	0	1	0	0	0	1	0	0	0	1	1		x	x	x	x	x	x	x	x	x	x	x	x	x	x	x	x
662	1	1	0	1	1	0	1	1	1	0	0	1	0	0	1	0	0	0	0	0	0	0	0	0	0	0	0	0	0	0	0	0		x	x	x	x	x	x	x	x	x	x	x	x	x	x	x	x
663	0	1	0	0	0	0	1	0	1	1	0	1	0	1	1	0	1	0	0	0	0	0	0	0	0	0	0	0	0	0	0	0		x	x	x	x	x	x	x	x	x	x	x	x	x	x	x	x
664	0	0	1	0	0	0	1	0	0	0	1	0	0	0	0	0	0	0	0	0	0	0	0	0	0	0	1	0	0	0	0	0		x	x	x	x	x	x	x	x	x	x	x	x	x	x	x	x
665	1	0	0	0	0	0	0	0	0	0	0	0	1	0	0	0	0	0	0	0	0	0	0	0	0	0	0	0	0	0	0	0		x	x	x	x	x	x	x	x	x	x	x	x	x	x	x	x
666	1	0	0	0	0	0	1	0	0	0	0	1	0	0	0	0	0	0	0	0	0	0	0	0	0	0	1	0	0	0	0	0		x	x	x	x	x	x	x	x	x	x	x	x	x	x	x	x
667	1	1	1	0	0	0	0	0	0	0	0	1	0	0	0	0	0	1	0	0	0	0	0	0	0	0	0	0	0	0	0	0		x	x	x	x	x	x	x	x	x	x	x	x	x	x	x	x
668	0	1	1	0	0	0	1	1	0	0	0	0	0	0	0	0	0	0	0	0	0	0	0	0	0	0	0	0	0	0	0	0		x	x	x	x	x	x	668	x	x	x	x	x	x	x	x	x
669	0	0	0	0	0	1	1	0	0	1	0	0	0	0	0	1	0	0	0	0	0	0	0	0	0	0	0	0	0	0	1	0		x	x	x	x	x	x	x	x	x	x	x	x	x	x	x	x
670	0	0	0	0	1	0	1	0	0	0	0	0	0	0	0	0	0	0	0	0	0	0	0	1	0	0	0	0	0	0	0	0		x	x	x	x	670	x	x	x	x	x	x	x	x	x	x	x
671	0	0	1	0	1	0	1	0	0	0	0	1	1	0	1	0	0	0	0	0	0	0	0	0	0	0	0	0	0	0	0	0		x	x	x	x	671	x	x	x	x	x	x	x	671	x	x	x
672	0	1	1	0	1	0	1	0	1	0	0	0	1	0	1	0	0	0	0	0	0	0	0	0	0	0	0	0	0	0	0	0		x	x	x	x	x	x	x	x	x	x	x	x	x	x	x	x
673	1	0	0	0	1	0	0	0	0	0	0	0	1	1	1	0	0	1	0	0	0	0	0	0	0	1	0	0	0	0	0	0		673	x	x	x	x	x	x	x	x	x	x	x	x	673	x	x
674	1	1	0	1	1	0	0	0	1	1	0	0	1	1	0	0	0	0	0	0	0	0	0	0	0	0	0	0	0	0	1	1		x	x	x	x	x	x	x	x	x	x	x	x	x	674	x	x
675	1	0	0	1	1	0	0	0	0	1	0	0	1	1	0	0	0	0	0	0	0	0	0	1	0	0	0	0	0	0	0	1		x	x	x	x	x	x	x	x	x	x	x	x	x	675	x	x
676	1	0	0	0	0	0	0	0	0	1	0	0	0	1	0	0	1	0	0	0	0	0	0	0	0	0	1	0	1	0	0	1		x	x	x	x	x	x	x	x	x	x	x	x	x	676	x	x
677	1	0	0	0	0	0	1	0	0	0	1	0	0	1	0	0	0	0	0	0	0	0	0	1	0	0	1	0	0	0	1	1		x	x	x	x	x	x	x	x	x	x	x	x	x	677	x	x
678	0	0	0	0	0	0	1	0	0	0	0	0	0	1	0	0	0	0	0	0	0	0	0	1	0	0	1	0	0	0	0	1		x	x	x	x	x	x	x	x	x	x	x	x	x	678	x	x
679	0	0	0	0	0	0	0	0	0	0	0	0	0	1	0	0	0	0	0	1	0	0	0	1	0	0	0	0	0	0	0	1		x	x	x	x	x	x	x	x	x	x	x	x	x	679	x	x
680	0	0	0	0	0	0	0	0	0	1	0	0	0	1	0	0	0	0	0	0	0	0	0	0	0	0	1	0	0	0	0	1		x	x	x	x	x	x	x	x	x	x	x	x	x	680	x	x
681	1	0	0	0	0	0	1	0	0	0	0	0	0	1	0	0	0	0	0	0	0	0	0	0	0	0	0	0	0	0	0	1		x	x	x	x	x	x	x	x	x	x	x	x	x	x	x	x
682	1	0	0	1	0	0	0	0	0	0	0	0	0	1	0	0	0	0	0	0	0	0	0	0	0	0	1	0	0	0	0	1		x	x	x	x	x	x	x	x	x	x	x	x	x	x	x	x
683	1	0	0	0	0	0	0	0	0	0	0	0	0	1	0	0	0	0	0	0	0	0	0	0	0	0	0	0	0	0	0	1		x	x	x	x	x	x	x	x	x	x	x	x	x	x	x	x
684	0	0	0	0	0	0	0	1	0	0	0	0	0	1	0	0	0	0	0	0	0	0	0	0	0	0	0	0	0	0	0	1		x	x	x	x	x	x	x	x	x	x	x	x	x	x	x	x
685	1	1	0	0	0	1	0	1	0	0	0	1	0	0	0	1	0	0	0	0	0	0	0	0	0	0	0	0	0	0	0	1		x	x	x	x	x	685	x	x	x	x	x	x	x	x	x	x
686	1	0	0	0	1	1	0	0	0	0	0	0	0	0	0	0	0	0	0	0	0	0	0	0	0	0	0	0	0	0	0	0		x	x	x	x	x	686	x	x	x	x	x	x	x	x	x	x
687	0	1	0	0	0	1	0	0	0	0	0	0	0	0	0	0	0	0	0	0	0	0	0	0	0	0	0	0	0	0	1	0		x	x	x	x	x	x	x	x	x	x	x	x	x	x	x	x
688	0	1	0	0	1	1	1	0	0	0	0	1	0	0	1	0	0	0	0	0	0	0	1	0	0	0	0	0	0	0	0	0		x	x	x	x	x	x	x	x	x	x	x	x	x	x	x	x
689	1	1	0	0	1	1	0	0	1	1	0	1	1	0	0	0	0	0	0	0	0	0	0	0	0	0	0	0	0	0	0	0		x	x	x	x	x	x	x	x	x	x	x	x	x	x	x	x
690	1	0	0	0	0	1	0	0	1	1	0	1	0	0	0	0	0	1	0	0	0	0	0	1	0	0	0	0	0	0	0	0		x	x	x	x	x	x	x	x	x	x	x	x	x	x	x	x
691	1	0	0	0	0	0	1	0	1	1	0	0	0	0	0	0	0	0	0	0	0	0	0	1	0	0	0	0	0	0	1	1		x	x	x	x	x	x	x	x	x	x	x	x	x	x	x	x
692	0	0	0	0	0	1	1	0	0	0	0	0	0	0	0	1	1	0	0	0	0	0	0	1	0	0	0	0	0	0	1	0		x	x	x	x	x	x	x	x	x	x	x	x	x	x	x	x
693	0	0	0	0	0	0	0	0	0	0	0	0	0	1	0	0	0	0	0	0	0	0	0	0	0	0	0	0	0	0	1	0		x	x	x	x	x	x	x	x	x	x	x	x	x	x	x	x
694	0	0	1	0	0	0	0	0	0	0	0	0	0	1	0	0	0	0	0	0	0	0	0	0	0	0	0	0	0	0	1	0		x	x	x	x	x	x	x	x	x	x	x	x	x	x	x	x
695	0	0	0	1	0	0	0	0	0	0	0	0	0	1	0	0	0	0	0	0	0	0	0	0	0	0	0	0	0	0	0	0		x	x	x	x	x	x	x	x	x	x	x	x	x	x	x	x
696	0	1	0	0	0	0	1	0	0	0	0	0	0	1	0	0	0	0	0	0	0	0	0	0	0	0	0	0	0	0	0	0		x	x	x	x	x	x	x	x	x	x	x	x	x	x	x	x
697	0	0	0	0	0	0	0	0	0	0	0	1	0	0	0	0	0	0	0	0	0	0	0	0	0	0	0	0	0	0	0	0		x	x	x	x	x	x	x	x	x	x	x	x	x	x	x	x
698	0	0	0	0	0	0	1	0	0	0	0	0	0	0	0	0	0	0	0	0	0	0	0	0	0	0	0	0	0	0	0	0		x	x	x	x	x	x	x	x	x	x	x	x	x	x	x	x
699	0	0	0	0	0	1	0	0	0	0	0	0	1	0	0	0	0	0	0	0	0	0	0	0	0	0	0	0	0	0	0	0		x	x	x	x	x	x	x	x	x	x	x	x	x	x	x	x
700	1	0	0	0	0	1	0	1	0	0	0	0	0	0	0	0	0	0	0	0	0	0	0	0	0	0	0	0	0	0	0	0		x	x	x	x	x	x	x	x	x	x	x	x	x	x	x	x
701	0	0	0	0	0	1	0	0	0	0	0	0	0	0	0	0	0	0	0	0	0	0	0	1	0	0	0	0	0	0	0	0		x	x	x	x	x	x	x	x	x	x	x	x	x	x	x	x
702	1	0	1	0	0	0	0	1	0	0	0	0	0	0	0	0	0	1	0	0	0	0	1	0	0	0	1	0	0	0	0	0		702	x	x	x	x	x	x	x	x	x	x	x	x	x	x	x
703	1	0	0	0	0	1	1	0	0	0	0	0	0	1	0	0	0	0	0	0	0	0	1	0	0	0	0	0	0	0	0	0		703	x	x	x	x	x	x	x	x	x	x	x	x	703	x	x
704	1	0	1	1	0	1	0	0	0	1	0	0	0	1	0	0	0	0	0	0	0	0	0	0	0	0	0	0	0	0	0	0		x	x	x	704	x	x	x	x	x	x	x	x	x	x	x	x
705	1	0	0	1	1	0	0	0	0	1	0	0	0	1	0	0	0	1	0	0	0	0	0	0	0	0	0	0	0	0	1	0		x	x	x	705	x	x	x	x	x	x	x	x	x	x	x	x
706	1	0	1	1	1	0	0	0	0	1	0	0	0	1	0	0	0	0	0	0	0	0	0	0	0	0	0	0	0	0	1	0		x	x	x	x	x	x	x	x	x	x	x	x	x	x	x	x
707	1	0	0	1	0	0	1	0	0	1	1	0	0	1	0	0	0	0	0	0	0	0	0	1	0	0	0	0	0	0	1	0		x	x	x	x	x	x	x	x	x	x	x	x	x	x	x	x
708	0	0	0	1	0	0	0	1	0	0	0	0	0	0	0	0	0	0	0	0	0	0	0	1	0	0	0	0	0	0	0	0		x	x	x	x	x	x	x	x	x	x	x	x	x	x	x	x
709	0	0	0	1	0	0	1	1	0	0	0	0	0	0	0	0	0	0	0	0	0	0	0	0	0	0	1	0	0	0	0	0		x	x	x	x	x	x	x	x	x	x	x	x	x	x	x	x
710	0	1	0	0	0	0	0	0	0	0	0	0	0	0	0	0	0	0	0	0	0	0	0	0	0	0	1	0	0	0	0	1		x	x	x	x	x	x	x	x	x	x	x	x	x	x	x	x
711	0	1	0	0	0	0	0	0	0	0	0	0	0	0	0	0	0	0	0	0	0	0	0	0	0	0	0	0	0	0	0	1		x	x	x	x	x	x	x	x	x	x	x	x	x	x	x	x
712	1	1	0	0	0	0	0	0	0	0	0	0	0	0	1	0	0	0	0	0	0	0	0	0	0	0	1	0	0	0	0	0		x	x	x	x	x	x	x	x	x	x	x	x	x	x	x	x
713	1	1	0	0	0	0	0	0	0	0	0	0	0	0	0	0	0	0	0	0	0	0	0	0	0	0	0	0	0	0	0	0		x	x	x	x	x	x	x	x	x	x	x	x	x	x	x	x
714	0	0	0	0	0	0	0	0	0	0	0	0	0	0	0	0	0	0	0	0	0	0	0	0	0	0	0	0	0	0	0	1		x	x	x	x	x	x	x	x	x	x	x	x	x	x	x	x
715	0	0	0	0	0	0	0	0	0	0	1	0	0	1	1	0	0	0	0	0	0	0	0	0	0	0	1	0	0	0	1	0		x	x	x	x	x	x	x	x	x	x	x	x	x	x	x	x
716	1	0	0	0	0	0	0	0	0	0	0	0	0	1	0	0	0	0	0	0	0	0	0	0	0	0	1	0	0	0	0	0		x	x	x	x	x	x	x	x	x	x	x	x	x	x	x	x
717	0	0	0	0	0	0	0	0	0	0	0	0	0	0	0	0	0	0	0	0	0	0	0	0	0	0	0	0	0	0	1	0		x	x	x	x	x	x	x	x	x	x	x	x	x	x	x	x
718	0	0	0	0	0	0	0	0	0	0	0	0	0	0	1	0	0	0	0	0	0	0	0	1	0	0	0	0	0	0	0	0		x	x	x	x	x	x	x	x	x	x	x	x	x	x	x	x
719	1	0	0	0	0	0	0	0	0	0	0	1	1	0	1	0	0	1	0	0	0	0	0	0	0	0	0	0	0	0	1	0		x	x	x	x	x	x	x	x	x	x	x	x	x	x	x	x
720	1	0	0	0	0	0	1	0	0	1	0	0	0	0	0	0	0	1	0	0	0	0	0	0	0	0	0	0	0	0	0	0		x	x	x	x	x	x	x	x	x	x	x	x	x	x	x	x
721	1	0	0	0	0	0	0	0	0	0	0	0	0	0	1	0	0	0	0	0	0	0	0	0	0	0	1	0	0	0	1	0		x	x	x	x	x	x	x	x	x	x	x	x	x	x	x	x
722	1	1	0	0	0	0	0	0	0	0	0	0	0	1	0	0	0	0	0	0	0	0	0	0	0	0	0	0	0	0	0	0		x	x	x	x	x	x	x	x	x	x	x	x	x	x	x	x
723	0	0	0	0	0	0	0	0	0	0	0	0	0	0	0	0	0	1	0	0	0	0	0	0	0	0	0	0	0	0	0	0		x	x	x	x	x	x	x	x	x	x	x	x	x	x	x	x
724	1	1	0	0	0	0	0	0	0	0	0	0	0	0	0	0	0	1	0	0	0	0	1	0	0	0	0	0	0	0	0	0		x	x	x	x	x	x	x	x	x	x	x	x	x	x	x	x
725	0	0	0	0	0	0	0	0	0	0	0	0	0	0	0	0	0	0	0	0	0	0	1	0	0	0	0	0	0	0	0	0		x	x	x	x	x	x	x	x	x	x	x	x	x	x	x	x
726	0	0	0	1	0	0	0	0	0	0	0	0	0	1	0	0	0	0	0	0	0	0	1	0	0	0	0	0	0	0	0	0		x	x	x	x	x	x	x	x	x	x	x	x	x	726	x	x
727	0	0	0	0	0	0	0	0	0	0	0	0	0	1	0	0	0	0	0	0	0	0	1	0	0	0	1	0	0	0	0	0		x	x	x	x	x	x	x	x	x	x	x	x	x	x	x	x
728	0	0	1	0	0	0	0	0	0	0	0	0	0	1	0	0	0	0	0	0	0	0	1	0	0	0	0	0	0	0	0	0		x	x	x	x	x	x	x	x	x	x	x	x	x	x	x	x
729	0	0	1	0	0	0	0	0	0	0	0	0	0	1	0	0	0	0	0	0	0	0	1	0	0	0	0	0	0	0	0	0		x	x	x	x	x	x	x	x	x	x	x	x	x	x	x	x
730	0	0	0	0	0	0	0	0	0	0	0	0	0	1	0	0	0	0	0	0	0	0	1	0	0	0	0	0	0	0	0	0		x	x	x	x	x	x	x	x	x	x	x	x	x	x	x	x
731	0	0	0	0	0	0	0	0	0	0	0	0	0	0	0	0	0	0	0	0	0	0	1	0	0	0	0	0	0	0	0	0		x	x	x	x	x	x	x	x	x	x	x	x	x	x	x	x
732	0	0	0	0	0	0	0	0	0	0	0	0	0	0	1	0	0	0	0	0	0	0	1	0	0	0	0	0	0	0	0	0		x	x	x	x	x	x	x	x	x	x	x	x	x	x	732	x
733	0	0	0	0	0	0	0	0	0	0	0	0	0	1	1	0	0	0	0	1	0	0	1	0	0	0	0	0	0	0	0	0		x	x	x	x	x	x	x	x	x	x	x	x	x	x	733	x
734	0	0	0	0	0	0	0	0	0	0	0	0	0	0	1	0	0	0	0	0	0	0	0	0	0	0	0	1	0	0	0	0		x	x	x	x	x	x	x	x	x	x	x	x	x	x	734	x
735	0	0	0	0	0	0	0	0	0	0	0	0	0	0	1	0	0	0	0	0	0	0	0	0	1	0	0	0	0	0	0	1		x	x	x	x	x	x	x	x	x	x	x	x	x	x	735	x
736	0	0	1	0	0	0	0	0	0	0	0	0	0	0	1	0	0	0	1	1	0	0	0	0	1	0	0	0	0	0	1	1		x	x	736	x	x	x	x	x	x	x	x	x	x	x	736	x
737	0	1	1	0	0	0	0	0	0	0	0	0	0	1	1	0	0	0	1	1	0	0	0	0	1	0	0	0	0	0	1	0		x	x	x	x	x	x	x	x	x	x	x	x	x	737	737	x
738	1	0	1	0	0	0	0	0	0	0	0	0	0	1	1	0	0	0	1	1	0	0	1	0	1	0	0	1	0	0	1	0		738	x	x	x	x	x	x	x	x	x	x	x	x	738	738	x
739	1	0	1	0	0	0	0	0	0	0	0	0	0	1	1	0	0	0	1	1	0	0	1	0	1	0	0	1	0	0	1	0		x	x	x	x	x	x	x	x	x	x	x	x	x	739	739	x
740	1	0	1	0	0	0	0	0	0	0	0	0	0	1	1	0	0	0	1	1	0	0	1	0	1	0	1	1	0	0	1	0		x	x	x	x	x	x	x	x	x	x	x	x	x	740	x	x
741	1	0	0	0	0	0	0	0	0	0	0	0	0	1	1	0	0	0	1	1	0	0	0	0	1	0	0	1	0	0	1	0		x	x	x	x	x	x	x	x	x	x	x	x	x	741	x	x
742	1	0	0	0	0	0	0	1	0	0	0	0	0	1	1	0	0	0	1	1	0	0	1	0	1	0	1	1	1	0	1	0		x	x	x	x	x	x	x	x	x	x	x	x	x	742	x	x
743	0	0	0	0	0	0	0	0	0	0	0	0	0	1	1	0	0	0	0	1	0	0	0	0	1	0	0	0	1	0	0	0		x	x	x	x	x	x	x	x	x	x	x	x	x	743	x	x
744	1	0	0	0	1	0	0	0	0	0	0	0	0	1	0	1	0	0	0	1	0	0	0	0	1	0	0	0	0	0	1	0		x	x	x	x	744	x	x	x	x	x	x	x	x	744	x	x
745	0	0	0	0	1	0	0	0	0	0	0	0	0	1	0	0	0	0	0	1	0	0	0	0	1	0	0	1	0	0	0	0		x	x	x	x	745	x	x	x	x	x	x	x	x	x	x	x
746	1	0	0	0	1	0	0	0	0	0	0	0	0	1	1	0	0	0	0	1	0	0	0	1	1	0	0	1	0	0	0	0		x	x	x	x	746	x	x	x	x	x	x	x	x	x	x	x
747	1	1	1	1	1	0	0	0	0	0	0	0	0	1	0	0	0	0	0	1	0	0	0	0	1	0	0	1	0	0	0	0		x	x	x	747	747	x	x	x	x	x	x	x	x	x	x	x
748	0	1	0	1	1	0	0	0	0	0	0	0	0	1	1	0	0	0	0	1	0	0	1	0	1	0	0	1	0	0	0	0		x	x	x	748	748	x	x	x	x	x	x	x	x	x	748	x
749	0	0	0	1	1	0	0	0	0	0	0	0	0	0	1	1	0	0	0	1	0	0	1	0	1	0	0	0	0	0	1	0		x	x	x	749	749	x	x	x	x	x	x	x	x	x	749	749
750	1	0	0	1	1	0	0	0	0	0	0	0	0	0	1	1	0	0	1	1	0	0	0	0	1	0	0	0	0	0	1	0		x	x	x	750	750	x	x	x	x	x	x	x	x	x	x	x
751	1	0	0	1	1	0	0	0	0	0	0	0	0	0	1	1	0	0	0	1	0	0	0	0	1	0	0	1	0	0	0	0		x	x	x	751	751	x	x	x	x	x	x	x	x	x	x	x
752	1	0	1	1	1	0	0	0	0	0	0	0	0	1	1	1	0	0	1	1	0	0	0	0	1	0	1	1	1	0	1	0		x	x	x	752	752	x	x	x	x	x	x	x	x	x	x	x
753	1	0	0	1	1	0	0	0	0	0	0	0	0	0	1	1	0	0	1	1	0	0	0	0	1	0	0	1	0	0	1	0		x	x	x	753	753	x	x	x	x	x	x	x	x	x	x	x
754	0	0	0	1	1	0	0	0	0	0	0	0	0	0	0	0	0	0	1	1	0	0	1	0	1	0	0	1	0	0	1	0		x	x	x	754	754	x	x	x	x	x	x	x	x	x	x	x
755	0	0	0	1	1	0	1	0	0	0	0	0	0	1	1	1	0	0	0	1	0	0	1	0	1	0	0	1	0	0	1	0		x	x	x	755	755	x	x	x	x	x	x	x	x	755	755	755
756	0	0	0	1	1	0	0	0	1	0	0	0	0	1	1	1	0	0	0	1	0	0	1	0	1	0	0	1	0	0	1	0		x	x	x	756	756	x	x	x	756	x	x	x	x	756	756	756
757	0	0	0	1	1	0	0	0	1	1	0	0	0	1	1	1	0	1	0	1	0	0	1	0	1	0	0	1	0	0	1	0		x	x	x	x	757	x	x	x	757	x	x	x	x	757	757	757
758	0	0	0	1	1	0	0	0	1	0	0	0	0	1	1	1	0	1	0	1	0	0	1	1	1	0	0	0	0	0	1	0		x	x	x	x	758	x	x	x	758	x	x	x	x	758	x	758
759	1	0	0	1	1	0	0	0	1	0	0	0	0	1	1	1	0	0	1	1	0	0	1	0	1	0	0	0	0	0	1	0		x	x	x	x	759	x	x	x	759	x	x	x	x	759	x	759
760	0	0	0	1	1	0	0	0	1	0	0	0	0	1	1	1	0	0	1	1	0	0	1	0	1	0	0	1	0	0	1	0		x	x	x	x	760	x	x	x	760	x	x	x	x	760	x	760
761	1	1	1	0	1	0	0	0	1	0	0	0	0	1	1	1	0	0	1	1	0	0	1	0	1	0	0	1	1	0	1	0		x	x	x	x	761	x	x	x	761	x	x	x	x	761	x	761
762	1	0	0	1	1	0	1	0	1	0	0	0	0	1	0	1	0	0	1	1	0	0	1	0	1	1	0	1	1	0	1	0		x	x	x	762	762	x	x	x	762	x	x	x	x	762	x	762
763	0	0	0	1	1	0	0	0	1	0	0	0	0	1	0	1	0	0	1	1	0	0	1	0	1	1	0	1	0	0	1	0		x	x	x	763	763	x	x	x	763	x	x	x	x	763	x	763
764	1	0	0	1	1	0	1	0	1	0	0	0	0	1	0	1	0	0	1	1	0	0	1	0	1	1	0	1	0	0	1	0		x	x	x	764	764	x	x	x	764	x	x	x	x	764	x	764
765	1	0	0	1	1	0	1	0	1	0	0	0	0	1	0	1	0	0	1	1	0	0	1	0	1	0	0	1	0	0	1	0		x	x	x	765	765	x	x	x	765	x	x	x	x	765	x	x
766	0	0	0	1	1	0	1	0	1	0	0	0	0	1	1	1	0	1	1	0	0	0	1	0	1	0	0	1	0	0	1	0		x	x	x	766	766	x	x	x	766	x	x	x	x	766	x	x
767	0	0	0	1	1	0	0	0	1	0	0	0	0	1	1	1	0	0	1	0	0	0	1	0	1	0	0	1	0	0	1	0		x	x	x	767	767	x	x	x	767	x	x	x	x	767	x	x
768	1	0	1	1	1	0	0	0	1	0	0	0	0	1	0	1	0	0	1	0	0	0	1	0	1	0	0	1	0	0	1	0		x	x	x	768	768	x	x	x	768	x	x	x	x	768	x	x
769	1	0	0	1	1	0	0	0	1	0	1	0	0	1	0	0	0	0	1	0	0	0	1	0	1	0	0	1	0	0	1	0		x	x	x	769	769	x	x	x	769	x	x	x	x	769	x	x
770	1	0	0	1	1	0	1	0	1	0	0	0	0	1	1	1	0	0	1	1	0	0	1	0	1	0	1	1	0	0	1	1		x	x	x	770	770	x	x	x	770	x	x	x	x	770	770	770
771	0	0	1	1	1	0	0	0	1	1	0	0	0	1	1	1	0	0	1	1	0	0	1	0	1	0	0	1	0	0	1	1		x	x	x	771	771	x	x	x	771	x	x	x	x	x	771	771
772	0	0	0	1	1	0	0	0	1	0	0	0	0	1	1	1	0	0	1	1	0	0	1	1	1	0	0	1	0	0	1	1		x	x	x	772	772	x	x	x	772	x	x	x	x	x	772	772
773	0	0	0	1	1	0	1	0	1	0	0	0	0	1	1	1	0	0	0	1	0	0	1	1	1	0	0	1	0	0	1	1		x	x	x	773	773	x	773	x	773	x	x	x	x	x	773	773
774	0	0	0	1	1	0	1	0	1	1	0	0	0	1	1	1	0	0	0	1	0	0	1	1	1	0	1	1	0	0	1	1		x	x	x	774	774	x	774	x	774	x	x	x	x	x	774	774
775	0	0	0	1	1	0	1	0	1	1	0	0	0	0	1	1	0	0	0	1	0	0	1	1	1	0	1	1	0	0	1	1		x	x	x	775	775	x	775	x	775	x	x	x	x	x	775	775
776	0	0	1	1	1	1	1	0	1	1	0	1	0	1	1	1	0	1	1	1	0	0	1	1	1	0	0	1	0	0	1	1		x	x	776	776	776	x	776	x	776	x	x	x	x	x	776	776
777	0	1	1	1	1	0	1	0	1	0	0	0	0	0	1	1	0	1	1	1	0	0	0	1	1	0	0	1	0	0	1	1		x	x	777	777	777	x	777	x	777	x	x	x	x	x	777	777
778	0	0	1	1	1	0	1	0	1	0	0	0	0	0	1	1	0	0	1	1	0	0	1	1	0	1	0	1	0	0	1	0		x	x	778	778	778	x	778	x	778	x	x	x	x	x	778	778
779	0	0	1	1	1	0	1	0	1	0	1	0	0	1	1	1	0	0	1	1	0	0	1	1	1	0	0	1	0	0	1	0		x	x	779	779	779	x	779	x	779	x	x	x	x	779	779	779
780	1	0	1	1	1	0	1	0	1	0	1	1	0	1	1	1	0	1	1	1	0	0	0	1	1	0	0	1	0	0	1	0		x	x	780	780	780	x	780	x	780	x	x	x	x	780	780	780
781	0	0	1	1	1	0	1	0	1	0	1	0	0	1	1	1	0	0	1	1	0	0	0	1	1	0	0	1	1	0	1	0		x	x	781	781	781	x	781	x	781	x	x	x	x	781	781	781
782	1	1	1	1	1	0	1	0	1	0	1	0	0	1	1	1	0	0	1	1	0	0	0	1	1	1	0	1	0	1	1	0		x	x	782	782	782	x	782	x	782	x	x	x	x	782	782	782
783	0	1	1	1	1	0	1	0	1	1	0	0	0	1	1	1	1	0	1	1	0	0	1	1	1	1	0	1	0	1	1	0		x	x	783	783	783	x	783	x	x	783	x	x	x	783	783	783
784	0	0	1	1	1	0	1	0	1	1	0	0	0	1	1	1	1	0	1	1	0	1	1	1	1	1	0	1	0	1	1	0		x	x	x	784	784	x	784	x	x	x	x	x	x	x	784	784
785	0	0	1	1	1	0	1	0	1	1	0	0	0	1	1	1	1	1	1	1	0	1	1	1	0	1	0	0	0	1	1	0		x	x	x	785	785	x	785	x	x	x	x	x	x	x	785	785
786	0	0	1	1	1	0	1	0	1	1	0	0	0	1	1	1	1	1	1	1	0	0	1	1	1	1	0	0	0	0	1	0		x	x	x	786	786	x	786	x	x	x	x	x	x	x	786	786
787	0	0	1	1	1	0	1	0	0	1	0	0	0	1	1	1	1	1	1	1	0	0	0	1	1	1	0	0	0	0	1	0		x	x	x	787	787	x	787	x	x	x	x	x	x	x	787	787
788	0	0	0	1	1	0	1	0	1	0	0	0	0	0	1	1	1	1	0	1	0	1	0	1	1	1	0	0	0	0	1	0		x	x	x	788	788	x	788	x	788	x	x	x	x	x	788	788
789	0	0	0	1	1	0	1	0	1	1	0	0	0	1	1	1	1	1	0	1	0	1	0	1	1	1	0	0	0	0	1	0		x	x	x	789	789	x	789	x	789	789	x	x	x	789	789	789
790	0	0	0	1	1	0	1	1	1	1	0	0	0	1	1	1	1	1	0	0	0	1	0	1	1	1	0	1	0	0	1	0		x	x	x	790	790	x	790	x	790	790	x	x	x	790	790	790
791	1	0	1	1	1	0	1	1	1	1	0	0	0	1	1	1	1	1	0	0	0	1	0	1	1	1	0	0	0	1	1	0		x	x	x	791	791	x	791	x	791	791	x	x	x	791	791	791
792	0	0	0	1	1	0	1	1	1	1	0	0	0	1	1	1	1	1	0	0	0	1	0	1	1	1	0	0	0	1	1	0		x	x	x	792	792	x	792	x	792	792	x	x	x	792	792	792
793	0	0	0	1	1	0	1	1	1	1	0	0	0	1	1	1	1	1	0	1	0	1	1	1	1	1	0	1	1	0	1	0		x	x	x	793	793	x	793	x	793	793	x	x	x	793	793	793
794	0	1	0	1	1	1	1	0	1	1	0	0	0	1	1	1	1	1	1	1	0	1	0	1	1	1	0	0	0	0	1	0		x	x	x	794	794	x	794	x	794	x	x	x	x	794	794	794
795	1	1	0	1	1	0	1	0	1	1	0	0	0	1	1	1	1	1	1	1	0	1	1	1	1	1	0	0	0	1	1	0		795	x	x	795	795	x	795	x	795	x	x	x	x	795	795	795
796	1	0	0	1	1	0	1	0	1	1	1	0	0	1	1	1	1	1	1	0	0	1	1	1	1	1	0	0	1	1	1	0		x	x	x	796	796	x	796	x	796	x	796	x	x	796	796	796
797	1	0	0	1	1	1	1	0	1	1	1	0	0	1	1	1	1	1	1	0	0	1	0	1	1	1	0	1	0	0	1	0		x	x	x	797	797	x	797	x	797	x	797	x	x	797	x	797
798	1	0	0	1	1	0	1	0	1	0	1	0	0	1	1	1	1	1	1	0	0	1	0	0	0	1	0	1	1	1	1	0		x	x	x	798	798	x	798	x	798	x	798	x	x	798	x	798
799	1	0	0	1	1	1	1	1	1	1	1	0	0	1	1	1	1	1	1	0	0	0	1	0	1	1	0	1	0	1	1	0		x	x	x	799	799	799	799	x	799	799	799	x	x	799	x	799
800	0	0	0	1	1	1	1	0	1	1	1	1	0	1	1	1	1	1	1	0	0	1	0	1	1	1	1	1	1	1	0	0		x	x	x	800	800	800	800	x	800	800	800	x	x	800	x	800
801	0	1	1	1	1	1	1	1	1	1	1	0	0	1	0	1	1	1	1	0	0	0	1	1	1	1	0	1	1	1	1	0		x	x	x	801	801	801	801	801	801	801	801	x	x	801	x	801
802	1	1	1	1	1	1	1	1	1	1	1	0	0	1	0	1	1	1	1	0	0	0	0	0	1	1	0	1	1	1	0	1		x	x	x	802	802	802	802	802	802	802	802	x	x	802	x	x
803	1	1	0	1	1	1	1	1	1	1	1	0	0	1	1	1	1	1	1	0	0	0	1	1	1	1	0	1	1	1	1	1		x	x	x	803	803	803	803	803	803	803	803	x	x	803	803	x
804	0	1	0	1	1	1	1	1	1	1	1	0	0	1	1	1	1	1	1	0	0	0	1	1	1	1	0	1	1	1	0	1		x	x	x	x	804	804	804	804	804	804	804	x	x	804	804	x
805	0	0	0	1	1	1	1	1	1	1	1	1	0	1	1	1	1	1	1	0	0	1	1	1	1	1	1	1	1	1	1	1		x	x	x	x	805	805	805	805	805	805	805	805	x	805	805	x
806	0	0	1	1	1	1	1	1	1	1	1	1	0	1	1	0	1	1	1	1	0	1	1	0	0	1	1	1	1	1	1	1		x	x	806	x	806	806	806	806	806	806	806	806	x	806	806	x
807	0	0	1	1	1	1	1	1	1	1	1	1	1	1	1	1	1	1	1	1	0	1	1	1	1	1	0	1	1	1	1	1		x	x	807	x	807	807	807	807	x	807	807	807	807	807	807	807
808	0	0	1	0	1	1	1	1	1	1	1	1	1	1	1	1	1	1	1	1	0	1	1	1	1	1	0	1	1	1	1	1		x	x	x	x	808	808	808	808	x	808	808	808	808	808	808	808
809	0	0	1	1	1	1	1	1	1	1	1	1	1	1	1	1	1	1	1	0	0	1	0	1	1	1	0	1	1	1	1	1		x	x	x	809	809	809	809	809	x	809	809	809	809	809	809	809
810	0	0	1	1	1	1	1	1	1	1	1	1	1	1	1	1	1	1	1	1	0	1	1	1	1	1	0	1	1	1	1	1		x	x	x	810	810	810	810	810	x	810	810	810	810	810	810	810
811	1	0	1	1	1	1	1	1	0	1	1	1	1	1	1	1	1	1	1	1	0	0	1	1	1	1	1	1	1	1	1	1		x	x	x	811	811	811	811	811	x	811	811	811	811	811	811	811
812	0	0	0	1	1	1	1	1	1	1	1	1	1	1	1	1	1	1	1	1	0	1	1	1	0	1	1	1	1	1	1	1		x	x	x	812	812	812	812	812	812	812	812	812	812	812	812	812
813	0	0	0	1	1	1	1	1	1	1	1	1	1	1	1	1	1	1	1	1	0	0	1	1	1	1	1	1	1	1	1	1		x	x	x	813	813	813	813	813	813	813	813	813	813	813	813	813
814	0	0	0	1	1	1	1	1	1	1	1	1	1	1	1	1	1	1	1	0	0	1	0	1	1	1	1	1	1	1	1	1		x	x	x	814	814	814	814	814	814	814	814	814	814	814	814	814
815	1	1	0	1	1	1	1	1	1	1	1	1	1	1	1	1	1	1	0	1	0	1	1	1	1	1	1	1	1	1	1	1		x	x	x	815	815	815	815	815	815	815	815	815	815	815	815	815
816	0	0	0	1	1	1	1	1	1	1	1	1	1	1	1	1	1	1	0	1	0	0	1	1	1	1	1	1	1	1	1	1		x	x	x	816	816	816	816	816	816	816	816	816	816	816	816	816
817	1	1	0	1	1	1	1	1	1	1	1	1	1	1	1	1	1	1	0	1	0	1	1	1	1	1	1	1	1	1	1	1		817	817	x	817	817	817	817	x	817	817	817	817	817	817	817	817
818	1	1	0	1	1	1	1	1	1	1	1	1	1	1	1	1	1	1	0	1	0	1	1	1	1	1	1	1	1	1	1	1		818	818	x	818	818	818	818	x	818	818	818	818	818	818	818	818
819	1	1	1	1	1	1	1	1	1	1	1	1	1	1	1	1	1	1	0	1	0	0	1	1	1	1	1	1	1	1	1	1		819	819	x	819	819	819	819	x	819	819	819	819	819	819	819	819
820	1	1	0	1	1	1	1	1	1	1	1	1	1	1	1	1	1	1	0	1	0	1	1	1	1	1	1	1	1	1	1	1		820	820	x	820	820	820	820	x	x	820	820	820	820	820	820	820
821	1	1	0	1	1	1	1	0	1	1	1	1	1	1	1	1	1	1	0	0	0	1	1	1	1	1	1	1	1	1	1	1		821	821	x	821	821	821	821	x	x	821	821	821	821	821	821	821
822	1	1	0	1	1	1	1	1	1	1	1	1	1	1	1	1	1	1	0	1	0	1	1	1	1	1	1	1	1	1	1	1		822	822	x	822	822	822	822	822	x	822	822	822	822	822	822	822
823	1	1	0	1	1	1	1	1	1	1	1	1	1	1	1	1	1	1	0	1	0	0	1	1	1	1	1	1	1	1	1	1		823	823	x	823	823	823	823	823	x	823	823	823	823	823	823	823
824	1	1	0	1	1	1	1	1	0	1	1	1	1	1	1	1	1	1	0	1	0	1	0	1	1	1	1	1	1	1	1	1		824	824	x	824	824	824	824	824	x	824	824	824	824	824	824	824
825	1	1	0	1	1	1	1	1	0	1	1	1	1	1	1	1	1	1	0	1	0	1	1	1	1	1	1	1	1	1	1	1		825	825	x	825	825	825	825	825	x	825	825	825	825	825	825	825
826	1	1	1	1	1	1	1	1	1	1	1	1	1	1	1	1	1	1	0	1	0	1	1	0	1	1	1	1	1	1	1	1		x	826	x	826	826	826	826	826	x	826	826	826	826	826	826	826
827	1	1	1	1	1	1	1	1	0	1	1	1	1	1	1	1	1	1	0	1	0	1	1	0	1	1	1	1	1	1	1	1		x	827	x	827	827	827	827	827	x	827	827	827	827	827	827	827
828	1	1	1	1	1	1	1	1	0	1	1	1	1	1	1	1	1	1	1	0	0	1	1	1	1	1	1	1	1	0	1	1		x	828	x	828	828	828	828	828	x	828	828	828	828	x	828	828
829	1	1	0	1	1	1	1	1	0	1	1	1	1	1	1	1	1	1	0	1	0	1	1	1	1	1	1	1	1	0	1	1		x	829	x	829	829	829	829	829	x	829	829	829	829	x	829	829
830	0	1	0	1	1	1	1	1	0	1	1	1	1	1	1	1	1	1	0	1	0	1	1	1	1	1	1	1	1	1	1	1		x	830	x	830	830	830	830	830	x	830	830	830	830	x	830	830
831	0	1	0	1	1	1	1	1	1	1	1	1	1	1	1	1	1	1	0	1	0	1	1	1	1	1	1	1	1	1	1	1		x	831	x	831	831	831	831	831	831	831	831	831	831	x	831	831
832	0	1	0	1	1	1	1	1	1	1	1	1	1	0	1	1	1	1	1	1	0	1	1	1	1	1	1	1	1	1	1	1		x	832	x	832	832	832	832	832	832	832	832	832	832	x	832	832
833	0	1	0	1	1	1	1	1	1	1	1	1	1	0	1	1	1	1	1	0	0	1	1	1	1	1	1	1	1	1	1	1		x	833	x	833	833	833	833	833	833	833	833	833	833	x	833	833
834	0	1	1	1	1	1	1	1	1	1	1	1	1	0	1	1	1	1	1	1	0	1	1	1	1	1	1	0	1	1	1	1		x	834	x	834	834	834	834	834	834	834	834	834	834	x	834	834
835	0	1	0	1	1	1	1	1	1	1	1	1	1	0	1	1	1	1	0	1	0	0	1	1	1	1	1	1	1	1	1	1		x	835	x	835	835	835	835	835	835	835	835	835	835	x	835	835
836	0	1	0	1	1	1	1	1	1	1	1	1	1	0	1	1	1	1	0	1	0	1	0	1	1	1	1	1	1	1	1	1		x	836	x	836	836	836	836	836	836	836	836	836	836	x	836	836
837	0	1	0	1	1	1	1	1	1	1	1	1	1	0	1	1	1	1	1	1	0	0	1	1	1	1	1	0	1	1	1	1		x	837	x	837	837	837	837	837	837	837	837	837	837	x	837	837
838	0	1	0	1	1	1	1	1	1	1	1	1	1	0	1	1	1	1	1	0	0	0	1	1	1	1	1	1	1	1	1	1		x	838	x	838	838	838	838	838	838	838	838	838	838	x	838	838
839	0	1	0	1	1	1	1	1	1	1	1	1	1	1	1	1	1	1	0	0	0	0	1	1	1	1	1	1	1	1	1	1		x	839	x	839	839	839	x	839	839	839	839	839	839	839	839	839
840	1	1	0	1	1	1	1	1	1	1	1	1	1	1	1	1	1	1	1	1	0	1	1	1	1	1	1	1	1	1	1	1		x	840	x	840	840	840	x	840	840	840	840	840	840	840	840	840
841	0	1	0	1	1	1	1	1	1	1	1	1	1	1	1	1	1	1	1	1	0	1	1	1	1	1	1	1	1	1	1	1		x	841	x	841	841	841	x	841	x	841	841	841	841	841	841	841
842	0	1	0	1	1	1	1	1	1	1	1	1	1	1	1	1	1	1	1	1	0	1	1	1	1	1	1	0	1	1	1	1		x	842	x	842	842	842	x	842	x	842	842	842	842	x	842	842
843	0	1	1	1	1	1	0	1	1	1	1	1	1	1	1	1	1	1	1	1	0	1	0	1	1	1	1	1	1	1	1	1		x	843	x	843	843	843	x	843	x	843	843	843	843	x	843	843
844	1	1	1	1	1	1	1	1	1	1	1	1	1	1	1	1	1	1	1	1	0	1	1	1	1	1	1	1	1	1	1	1		844	844	x	844	844	844	844	844	x	844	844	844	844	x	844	844
845	1	1	1	1	1	1	1	1	0	1	1	1	1	1	1	1	1	1	1	1	0	1	1	1	1	1	1	1	1	1	1	1		845	845	x	845	845	845	845	845	x	845	845	845	845	x	845	845
846	1	1	1	1	1	1	1	1	0	1	1	1	1	0	1	1	1	1	1	1	0	1	1	1	1	1	1	1	1	1	1	1		x	846	x	846	846	846	846	846	x	846	846	846	846	x	846	846
847	1	1	0	1	1	1	1	1	1	1	1	1	1	1	1	1	1	1	1	0	0	1	1	1	1	1	1	1	1	1	1	1		x	847	x	847	847	x	847	847	847	847	847	847	847	x	847	847
848	1	1	0	1	1	1	1	1	1	1	1	1	1	0	1	1	1	1	1	0	0	1	1	1	1	1	1	1	1	1	1	1		x	848	x	848	848	x	848	848	848	848	848	848	848	x	848	x
849	1	1	1	1	1	1	1	1	1	1	1	1	1	0	1	1	1	1	1	1	1	1	1	1	1	1	1	1	1	1	1	1		x	849	x	849	849	x	849	849	849	849	849	849	849	x	849	x
850	0	1	1	1	1	1	1	1	1	1	1	1	1	0	1	1	1	1	1	0	0	1	0	1	1	1	1	1	1	1	1	1		x	850	x	850	850	x	850	850	850	850	850	850	850	x	850	x
851	0	1	0	1	1	0	1	1	1	1	1	1	1	0	1	1	1	1	1	0	0	1	0	1	1	1	1	0	1	1	1	1		x	851	x	851	851	x	851	851	x	851	851	851	851	x	851	x
852	0	1	0	1	1	0	1	1	1	1	1	1	1	1	1	0	1	1	1	0	0	1	0	1	1	1	1	1	1	1	1	1		x	852	x	852	852	x	852	852	x	852	852	852	852	852	852	x
853	0	1	1	1	1	1	1	1	1	1	1	1	1	1	1	1	1	1	1	0	0	1	1	1	1	1	1	1	1	1	1	1		x	853	x	853	853	853	853	853	x	853	853	853	853	853	853	853
854	0	1	0	1	1	1	1	1	1	1	1	1	1	1	1	1	1	1	1	0	0	1	1	1	1	0	1	1	1	1	1	1		x	854	x	854	854	854	854	854	x	854	854	854	854	854	854	854
855	0	1	0	1	1	1	1	1	0	1	1	1	1	1	1	1	1	1	1	1	0	1	1	1	1	0	1	1	1	1	1	1		x	855	x	855	855	855	855	855	x	855	855	855	855	855	855	855
856	0	1	0	1	1	1	1	1	1	1	1	1	1	1	1	1	1	1	1	1	0	1	0	1	1	1	1	1	1	1	1	1		x	856	x	856	856	856	856	856	x	856	856	856	856	856	856	856
857	0	1	1	1	1	1	1	1	0	1	1	1	1	1	1	1	1	1	1	1	1	1	1	0	1	0	1	1	1	1	1	1		x	857	x	857	857	857	857	857	x	857	857	857	857	857	857	857
858	1	1	1	1	1	1	1	1	0	1	1	1	1	1	1	1	1	1	1	1	1	1	1	0	1	0	1	1	1	1	1	1		x	858	x	858	858	858	858	858	x	858	858	858	858	858	858	858
859	0	1	0	1	1	1	1	1	0	1	1	1	1	1	1	1	1	1	1	1	1	1	1	0	1	0	1	1	1	1	1	1		x	859	x	859	859	859	859	859	x	859	859	859	859	859	859	859
860	0	1	0	1	1	1	1	1	1	1	1	1	1	1	1	1	1	1	1	1	1	1	0	0	1	0	1	1	1	1	1	1		x	x	x	860	860	860	860	860	860	860	860	860	860	860	860	860
861	0	1	0	1	1	1	1	1	1	1	1	1	1	1	1	1	1	1	1	1	1	1	0	0	1	1	1	1	1	1	1	1		x	x	x	861	861	861	861	861	861	861	861	861	861	861	861	861
862	0	1	0	1	1	1	1	1	1	1	1	1	1	1	1	1	1	1	1	1	1	1	0	0	1	0	1	1	1	1	1	1		x	x	x	862	862	862	862	862	862	862	862	862	862	862	862	x
863	1	1	0	1	1	1	1	1	1	1	1	1	1	1	1	1	1	1	1	1	1	1	0	0	1	1	1	1	1	1	1	1		863	x	x	863	863	863	863	863	863	863	863	863	863	863	863	x
864	1	0	0	1	1	1	1	1	1	1	1	1	1	1	1	1	1	1	0	1	1	1	1	1	1	1	1	1	1	1	1	1		864	x	x	864	864	864	864	864	864	864	864	864	864	864	864	x
865	1	0	0	1	1	1	1	1	1	1	1	1	1	1	1	1	1	1	0	0	1	1	0	0	1	0	1	1	1	1	1	1		865	x	x	865	865	865	865	x	865	865	865	865	865	865	865	x
866	1	1	1	1	1	1	1	1	1	1	1	1	1	1	1	0	1	1	0	1	1	1	0	0	1	0	1	1	1	1	1	1		866	x	866	866	866	866	866	x	866	866	866	866	866	866	866	x
867	1	1	1	1	1	1	1	1	1	1	1	1	1	1	1	1	1	1	0	1	1	1	0	0	1	0	1	1	1	1	1	1		867	x	867	867	867	867	867	x	867	867	867	867	867	867	867	867
868	1	1	1	1	1	1	1	1	1	1	1	1	1	1	1	1	1	1	0	0	1	1	0	0	1	1	1	1	1	1	1	1		x	x	868	868	868	868	x	x	868	868	868	868	868	868	868	868
869	1	0	1	1	1	1	1	0	1	1	1	1	1	1	1	1	1	1	0	1	1	1	0	0	1	1	1	1	1	1	1	1		x	x	869	869	869	869	x	x	869	869	869	869	869	869	869	869
870	1	0	1	1	1	1	1	0	1	1	1	1	1	1	1	1	1	1	0	1	1	1	1	0	1	1	1	1	1	1	1	1		x	x	870	870	870	870	x	x	870	870	870	870	870	870	870	870
871	1	0	1	1	1	1	1	0	1	1	1	1	1	1	1	1	1	1	0	1	1	1	1	1	1	1	1	1	1	1	1	1		x	x	871	871	871	871	x	x	871	871	871	871	871	871	871	871
872	0	1	1	1	1	1	0	0	1	1	1	1	1	1	1	1	1	1	0	1	1	1	0	1	1	0	1	1	1	1	1	1		x	872	872	872	872	872	x	x	872	872	872	872	872	872	872	872
873	1	1	1	1	1	1	1	1	1	1	1	1	1	1	1	1	1	1	0	1	1	1	0	1	1	1	1	1	1	1	1	1		x	873	873	873	873	873	873	x	873	873	873	873	873	873	873	873
874	1	1	1	1	1	1	1	1	1	1	1	1	1	1	1	1	1	1	0	1	1	1	0	1	1	0	1	1	1	1	1	1		x	874	874	874	874	874	874	x	x	874	874	874	874	874	874	874
875	0	1	1	1	1	1	1	0	1	1	1	1	1	1	1	1	1	1	1	1	1	1	0	1	1	1	1	1	1	1	1	1		x	875	875	875	875	875	875	x	x	875	875	875	875	875	875	875
876	0	1	1	1	1	1	1	0	1	1	1	1	1	1	1	1	1	1	1	1	1	1	0	1	1	0	1	0	1	1	1	1		x	876	876	876	876	876	876	x	x	876	876	876	876	876	876	876
877	0	1	1	1	1	1	1	1	1	1	1	1	1	1	1	1	1	1	0	0	1	1	0	1	1	1	1	1	1	1	1	1		x	877	877	877	877	877	877	x	x	877	877	877	877	877	877	877
878	0	1	1	1	1	1	1	0	0	1	1	1	1	1	1	1	1	1	1	0	1	1	0	1	1	1	1	1	1	1	1	1		x	878	878	878	878	878	878	x	x	878	878	878	878	x	878	878
879	1	1	1	1	1	1	1	0	0	1	1	1	1	1	1	1	1	1	1	0	1	1	0	1	1	0	1	1	1	1	1	1		x	879	879	879	879	879	879	x	x	879	879	879	879	x	879	879
880	0	1	1	1	1	1	1	0	1	1	1	1	1	1	1	1	1	1	1	0	1	1	0	1	1	1	1	0	1	1	1	1		x	880	880	880	880	880	880	x	x	880	880	880	880	x	880	880
881	0	1	1	1	1	1	1	0	0	1	1	1	1	1	1	1	1	1	0	0	1	1	0	1	1	1	1	1	1	1	1	1		x	881	881	881	881	881	881	x	x	881	881	881	881	x	881	x
882	0	1	1	1	1	1	1	0	0	1	1	1	1	0	1	1	1	1	0	0	1	1	0	1	1	1	1	1	1	1	1	1		x	882	882	882	882	882	882	x	x	882	882	882	882	x	882	x
883	0	1	1	1	1	1	1	0	1	1	1	1	1	0	1	1	1	1	1	0	1	1	0	1	1	1	1	1	1	1	1	1		x	883	883	883	883	x	883	x	x	883	883	883	883	x	883	x
884	0	1	1	1	1	1	1	0	0	1	1	1	1	0	1	1	1	1	1	1	1	0	1	1	1	1	1	1	1	1	1	1		x	884	884	884	884	x	884	x	x	884	884	884	884	x	884	x
885	1	1	1	1	1	1	1	0	1	1	1	1	1	0	1	0	1	1	1	1	1	1	0	1	1	0	1	1	1	1	1	1		x	885	885	885	885	x	885	x	x	885	885	885	885	x	885	x
886	0	1	1	1	1	1	1	1	1	1	1	1	1	1	1	1	1	1	1	1	1	1	1	1	1	1	1	1	1	1	0	1		x	886	886	886	886	x	886	x	x	886	886	886	886	x	886	886
887	0	1	1	1	1	0	1	0	1	1	1	1	1	0	1	1	1	1	0	0	1	1	1	1	1	0	1	1	1	1	0	1		x	887	887	887	887	x	887	x	x	887	887	887	887	x	887	887
888	1	1	1	1	1	1	1	0	0	1	1	1	1	1	1	1	1	1	1	1	1	1	1	1	1	1	1	0	1	1	1	1		x	888	888	888	888	888	888	x	x	888	888	888	888	888	888	888
889	0	1	1	1	1	1	1	0	1	1	1	1	1	1	1	1	1	1	1	1	1	1	1	1	1	1	1	1	1	1	0	1		x	889	889	889	889	889	889	x	x	889	889	889	889	889	889	889
890	0	1	1	1	1	1	1	0	1	1	1	1	1	1	1	1	1	1	1	1	1	1	0	1	1	0	1	1	1	1	1	1		x	890	890	890	890	890	890	x	x	890	890	890	890	890	890	890
891	0	1	1	1	1	1	1	0	1	1	1	1	1	1	1	1	1	1	0	1	1	1	0	1	1	1	1	1	1	1	1	1		x	891	891	891	891	891	891	x	x	891	891	891	891	891	891	891
892	0	1	1	1	1	1	1	0	0	1	1	1	1	1	1	1	1	1	0	1	1	1	0	1	1	1	1	1	1	1	1	1		x	892	892	x	892	892	892	x	x	892	892	892	892	892	892	892
893	0	1	1	1	1	1	1	0	1	1	1	1	1	1	1	1	1	1	1	1	1	1	0	1	1	0	1	1	1	1	1	1		x	893	893	x	893	893	893	x	x	893	893	893	893	x	893	893
894	1	1	1	1	1	1	1	0	1	1	1	1	1	1	1	1	1	1	1	1	1	1	0	1	1	1	1	1	1	1	0	1		x	894	x	x	894	894	894	x	x	894	894	894	894	x	894	894
895	1	1	1	1	1	1	1	0	1	1	1	1	1	1	1	1	1	1	0	1	1	1	0	1	1	1	1	1	1	1	1	1		x	895	x	x	895	895	895	x	x	895	895	895	895	x	895	895
896	0	1	1	0	1	1	1	0	0	1	1	1	1	1	1	1	1	1	1	1	1	1	0	1	1	1	1	1	1	1	0	1		x	896	x	x	896	896	896	x	x	896	896	896	896	x	896	896
897	0	1	1	1	1	1	1	0	1	1	1	1	1	0	1	1	1	1	0	1	1	1	0	0	1	1	1	1	1	1	1	1		x	897	x	897	897	897	897	x	x	897	897	897	897	x	897	897
898	0	1	0	1	1	1	1	1	1	1	1	1	1	1	1	1	1	1	1	1	1	1	0	0	1	1	1	1	1	1	1	1		x	898	x	898	898	898	898	898	x	898	898	898	898	x	898	898
899	0	1	0	1	1	1	1	1	1	1	1	1	1	0	1	1	1	1	0	1	1	1	1	0	1	1	1	1	1	1	1	1		x	899	x	899	899	899	899	899	x	899	899	899	899	x	899	899
900	1	1	0	1	1	1	1	1	0	1	1	1	1	0	1	1	1	1	0	1	1	1	0	0	1	0	1	1	1	1	1	1		900	900	x	900	900	900	900	900	x	900	900	900	900	x	900	900
901	1	1	0	1	1	1	1	1	0	1	1	1	1	1	1	1	1	1	0	1	0	1	0	0	1	0	1	1	1	1	1	1		901	901	x	901	901	901	901	x	x	901	901	901	901	901	901	901
902	1	1	0	1	1	1	1	1	0	1	1	1	1	1	1	1	1	1	0	1	0	1	0	0	1	0	1	1	1	1	0	1		902	902	x	902	902	902	902	x	x	902	902	902	902	902	902	902
903	1	1	0	1	1	1	1	1	1	1	1	1	1	1	1	1	1	1	0	1	1	1	0	0	1	1	1	1	1	0	1	1		903	903	x	903	903	903	903	x	x	903	903	903	903	903	903	903
904	1	1	0	1	1	1	1	1	0	1	1	1	1	1	1	1	1	1	0	1	0	1	0	0	1	0	1	1	1	1	1	1		904	904	x	904	904	904	904	x	x	904	904	904	904	904	904	904
905	1	1	0	1	1	1	1	0	1	1	1	1	1	1	1	1	1	1	0	1	0	1	0	1	1	0	1	1	1	1	1	1		905	905	x	905	905	905	x	x	x	905	905	905	905	905	905	905
906	1	1	1	1	1	1	1	1	0	1	1	1	1	1	1	1	1	1	0	0	0	1	0	1	1	0	1	1	1	1	0	1		906	906	x	906	906	906	x	x	x	906	906	906	906	906	906	906
907	1	1	1	1	1	1	1	1	0	1	1	1	1	1	1	1	1	1	0	1	0	1	1	1	1	1	1	1	1	1	1	1		907	907	x	907	907	907	x	x	x	907	907	907	907	907	907	907
908	1	1	0	1	1	1	1	0	1	1	1	1	1	1	1	1	1	1	0	0	0	1	1	1	1	0	1	1	1	1	1	1		908	908	x	908	908	908	x	x	908	908	908	908	908	908	908	908
909	1	1	0	1	1	1	0	0	1	1	1	1	1	1	1	1	1	1	1	1	0	1	1	1	1	0	1	1	1	1	1	1		909	909	x	909	909	909	x	x	909	909	909	909	909	909	909	909
910	1	1	0	1	1	1	1	0	1	1	1	1	1	1	1	1	1	1	1	0	0	1	1	1	1	0	1	1	1	1	0	1		910	910	x	910	910	910	x	x	910	910	910	910	910	910	910	910
911	1	1	0	1	1	1	1	0	1	1	1	1	1	1	1	1	1	1	0	0	1	1	1	0	1	0	1	1	1	1	1	1		911	911	x	911	911	911	x	x	911	911	911	911	911	911	911	911
912	1	1	0	1	1	1	0	0	1	1	1	1	1	1	1	1	1	1	1	1	1	1	1	1	1	0	1	0	1	1	1	1		912	912	x	912	912	912	x	x	912	912	912	912	912	x	912	912
913	1	1	1	1	1	1	1	1	1	1	1	1	1	1	1	1	1	1	0	1	1	1	1	0	1	0	1	1	1	1	1	1		913	913	x	913	913	913	913	913	913	913	913	913	913	x	913	913
914	1	1	1	1	1	1	1	1	1	1	1	1	1	1	1	1	1	1	0	1	1	1	1	0	1	0	1	1	1	1	0	1		914	914	x	914	914	914	x	x	914	914	914	914	914	x	914	914
915	1	1	0	1	1	1	1	1	1	1	1	1	1	1	1	1	1	1	0	1	1	1	1	0	1	0	1	1	1	1	1	1		915	915	x	915	915	915	x	x	915	915	915	915	915	x	915	915
916	1	1	0	1	1	1	1	1	1	1	1	1	1	0	1	1	1	1	0	0	1	1	1	1	1	0	1	1	1	1	1	1		916	916	x	916	916	916	x	x	916	916	916	916	916	x	x	916
917	1	1	0	1	1	1	1	1	1	1	1	1	1	1	1	1	1	1	1	1	1	1	1	0	1	1	1	1	1	1	1	1		917	917	x	917	917	917	x	x	917	917	917	917	917	x	x	917
918	1	1	0	1	1	1	0	0	1	1	1	1	1	0	1	1	1	1	1	1	1	1	1	0	1	1	1	1	1	1	1	1		918	918	x	918	918	918	x	x	918	918	918	918	918	x	x	918
919	1	1	1	1	1	1	1	0	1	1	1	1	1	1	1	1	1	1	1	0	1	1	1	1	1	1	1	0	1	1	1	1		919	919	x	919	919	919	919	x	919	919	919	919	919	x	x	919
920	1	1	0	1	1	1	1	0	1	1	1	1	1	0	0	1	1	1	1	1	1	0	1	0	1	1	1	1	1	1	1	1		920	920	x	920	920	920	920	x	920	920	920	920	920	x	x	920
921	1	1	1	1	1	1	1	0	1	1	1	1	1	1	1	1	1	1	1	0	1	1	1	0	1	1	1	0	1	1	1	1		921	921	x	921	921	921	921	x	921	921	921	921	921	921	x	921
922	1	1	1	1	1	1	1	0	1	1	1	1	1	1	1	1	1	1	1	1	1	0	1	1	1	1	1	0	1	1	0	1		922	922	x	922	922	922	922	x	922	922	922	922	922	922	x	922
923	1	1	1	1	1	1	1	1	1	1	1	1	1	1	1	1	1	1	1	1	1	0	1	0	1	1	1	0	1	1	1	1		x	923	x	923	923	923	923	x	923	923	923	923	923	923	x	923
924	1	1	1	1	1	1	1	1	1	1	1	1	1	1	1	1	1	1	0	1	1	0	1	0	1	1	1	0	1	1	0	1		x	924	x	924	924	924	924	x	924	924	924	924	924	924	x	924
925	1	1	0	1	1	1	1	1	1	1	1	1	1	1	0	1	1	1	0	1	1	0	1	0	1	1	1	0	1	1	1	1		x	925	x	925	925	925	925	x	x	925	925	925	925	925	x	925
926	1	1	1	1	1	1	1	0	1	1	1	1	1	1	1	1	1	1	0	1	1	0	1	0	1	1	1	0	1	1	1	1		x	926	x	926	926	926	926	x	x	926	926	926	926	926	926	926
927	0	1	1	1	1	1	1	0	1	1	1	1	1	1	1	1	1	1	0	0	1	0	1	0	1	1	1	1	1	1	1	1		x	927	x	927	927	927	927	x	x	927	927	927	927	927	927	927
928	0	1	0	1	1	1	1	0	1	1	1	1	1	1	1	1	1	1	0	0	1	0	1	1	1	1	1	1	1	1	1	1		x	928	x	928	928	928	928	x	x	928	928	928	928	928	928	928
929	0	1	0	1	1	1	1	0	0	1	1	1	1	1	1	1	1	1	0	1	1	1	1	1	1	1	1	0	1	1	0	1		x	929	x	929	929	929	929	x	x	929	929	929	929	929	929	929
930	0	1	0	1	1	1	1	0	0	1	1	1	1	1	1	1	1	1	0	1	0	0	1	0	1	1	1	0	1	1	0	1		x	930	x	930	930	930	930	x	x	930	930	930	930	930	930	930
931	1	1	0	1	1	1	1	0	1	1	1	1	1	1	1	1	1	1	0	1	0	0	1	0	1	1	1	1	1	1	0	1		x	931	x	931	931	931	931	x	931	931	931	931	931	931	931	931
932	1	1	1	1	1	1	1	1	1	1	1	1	1	1	1	1	1	1	0	1	1	0	1	0	1	1	1	1	1	1	0	1		x	932	x	932	932	932	932	932	932	932	932	932	932	932	932	932
933	1	1	1	1	1	1	1	1	1	1	1	1	1	1	1	1	1	1	1	1	1	1	1	0	1	1	1	1	1	1	0	1		x	933	x	933	933	933	933	933	933	933	933	933	933	933	933	933
934	0	1	0	1	1	1	1	1	1	1	1	1	1	1	1	1	1	1	0	1	1	1	1	0	1	1	1	1	1	1	1	1		x	934	x	934	934	934	934	934	934	934	934	934	934	934	934	934
935	0	1	0	1	1	1	1	1	1	1	1	1	1	1	1	1	1	1	0	1	1	1	1	0	1	1	1	1	1	1	0	1		x	935	x	935	935	935	935	935	935	935	935	935	935	935	935	935
936	0	1	1	1	1	1	1	1	1	1	1	1	1	1	1	1	0	1	0	1	1	1	1	0	1	1	1	1	1	1	0	1		x	936	x	936	936	936	936	936	936	936	936	936	936	936	936	936
937	0	1	1	1	1	1	1	1	1	1	1	1	1	1	1	1	1	1	0	1	0	1	1	0	1	1	1	1	1	1	0	1		x	937	x	937	937	937	937	937	937	937	937	937	937	937	937	937
938	0	1	1	1	1	1	1	1	1	1	1	1	1	1	1	1	1	1	0	1	0	1	1	0	1	0	1	1	1	1	0	1		x	938	x	938	938	938	938	938	938	938	938	938	938	938	938	938
939	0	1	1	1	1	1	1	1	1	1	1	1	1	1	1	1	1	1	1	1	1	1	1	0	1	0	1	1	1	1	0	1		x	939	x	939	939	939	939	939	939	939	939	939	939	939	939	939
940	0	1	0	1	1	1	1	1	1	1	1	1	1	1	1	1	1	1	1	1	1	1	1	1	1	0	1	1	1	1	0	1		x	940	x	940	940	940	940	940	940	940	940	940	940	940	940	940
941	0	1	0	1	1	1	1	1	1	1	1	1	1	1	1	1	1	1	1	1	0	1	1	0	1	0	1	1	1	1	0	0		x	941	x	941	941	941	941	941	941	941	941	941	941	941	941	941
942	0	1	0	1	1	1	1	1	1	1	1	1	1	1	1	1	1	1	1	1	0	1	1	0	1	0	1	1	1	1	0	0		x	942	x	942	942	942	942	942	942	942	942	942	942	942	942	942
943	0	1	0	1	1	1	1	1	1	1	1	1	1	1	1	1	1	1	1	0	1	1	1	0	1	0	1	1	1	1	1	1		x	943	x	943	943	943	943	943	943	943	943	943	943	943	943	943
944	0	1	1	1	1	1	1	1	1	1	1	1	1	1	1	1	1	1	1	0	1	1	1	0	1	0	1	1	1	1	1	1		x	944	x	944	944	944	944	944	944	944	944	944	944	944	944	944
945	0	1	0	1	1	1	1	1	1	1	1	1	1	1	1	1	1	1	1	0	1	1	0	0	1	0	1	1	1	1	1	1		x	945	x	945	945	945	945	945	945	945	945	945	945	945	945	945
946	1	1	0	1	1	1	1	1	1	1	1	1	1	1	1	1	1	1	1	0	1	1	0	0	1	0	1	1	1	1	1	1		x	946	x	946	946	946	946	x	946	946	946	946	946	946	946	946
947	0	1	0	1	1	1	1	1	1	1	1	1	1	1	1	1	1	1	1	0	1	1	1	0	1	1	1	1	1	1	1	1		x	947	x	947	947	947	947	x	947	947	947	947	947	947	947	947
948	0	1	1	1	1	1	1	1	1	1	1	1	1	1	1	1	1	1	1	0	1	1	1	0	1	1	1	1	1	1	1	1		x	948	948	948	948	948	948	x	948	948	948	948	948	948	948	x
949	0	1	1	1	1	1	1	1	1	1	1	1	1	1	1	1	1	1	1	0	1	1	0	1	1	1	1	1	1	1	1	1		x	949	949	949	949	949	949	x	949	949	949	949	949	949	949	x
950	1	1	1	1	1	1	1	0	1	1	1	1	1	1	1	1	1	1	1	1	1	1	1	1	1	0	1	1	1	1	1	1		x	950	950	950	950	950	950	x	950	950	950	950	950	950	950	x
951	0	1	1	1	1	1	1	1	1	1	1	1	1	1	1	1	1	1	1	0	1	1	0	1	1	1	1	1	1	1	1	1		x	951	951	951	951	951	951	x	951	951	951	951	951	951	951	x
952	1	1	1	1	1	1	1	1	1	1	1	1	1	1	1	0	1	1	1	0	1	1	1	1	1	1	1	1	1	1	1	1		x	952	952	952	952	952	952	x	x	952	952	952	952	952	952	x
953	0	1	1	1	1	1	1	0	1	1	1	1	1	1	1	1	1	1	1	1	1	1	0	1	1	1	1	1	1	0	1	1		x	953	x	953	953	953	953	x	x	x	953	953	953	953	953	x
954	0	1	1	1	1	1	1	0	1	1	1	1	1	1	1	0	1	1	1	1	1	1	0	1	1	1	1	1	1	1	1	1		x	954	x	954	954	954	954	x	x	x	954	954	954	954	954	x
955	0	1	1	1	1	1	1	1	1	1	1	1	1	1	1	1	1	1	1	1	1	1	0	1	1	0	1	1	1	0	1	1		x	955	x	955	955	x	955	x	x	x	955	955	955	955	955	955
956	0	1	1	1	1	1	1	1	0	1	1	1	1	1	1	1	1	1	1	1	1	1	1	1	1	1	1	1	1	1	1	1		x	956	x	956	956	x	956	x	x	x	956	956	956	956	956	956
957	0	1	0	1	1	1	1	0	0	0	1	1	1	1	1	1	1	1	0	1	0	1	0	1	1	1	1	1	1	0	1	1		x	957	x	957	957	x	957	x	x	x	957	957	957	957	957	957
958	0	1	0	1	1	1	1	0	1	1	1	1	1	1	1	1	1	1	0	1	0	1	0	1	1	0	1	1	1	0	1	1		x	958	x	958	958	x	958	x	x	958	958	958	958	958	958	958
959	0	1	0	1	1	0	1	0	0	1	1	1	1	1	1	1	1	1	1	1	0	1	0	1	1	1	1	1	1	0	1	1		x	959	x	959	959	x	959	x	x	959	959	959	959	959	959	959
960	1	1	0	1	1	1	1	0	0	1	1	1	1	1	1	1	1	1	1	1	1	1	1	1	1	1	1	1	1	1	1	1		960	960	x	960	960	x	x	x	x	960	960	960	960	960	960	960
961	1	1	0	1	1	1	1	1	0	1	1	1	1	1	1	1	1	1	1	1	0	1	1	0	1	1	1	1	1	0	1	1		961	961	x	961	961	x	x	961	x	961	961	961	961	961	961	961
962	1	1	0	1	1	1	1	1	0	1	1	1	1	1	1	1	1	1	1	1	1	1	1	1	1	0	1	1	1	0	1	1		962	962	x	962	962	x	x	962	x	962	962	962	962	962	962	962
963	1	1	1	1	1	0	1	1	0	1	1	1	1	1	1	1	1	1	1	1	0	1	1	1	1	1	1	1	1	1	1	1		963	963	x	963	963	x	x	x	x	963	963	963	963	963	963	963
964	1	1	0	1	1	0	0	1	0	1	1	1	1	1	1	1	1	1	1	1	0	0	1	1	1	0	1	1	1	0	1	1		964	964	x	964	964	x	x	x	x	964	964	964	964	964	964	964
965	1	1	0	1	1	1	1	1	0	1	1	1	1	1	1	1	1	1	1	1	0	0	1	1	1	1	1	0	1	1	1	1		965	x	x	965	965	965	x	x	x	965	965	965	965	965	965	965
966	1	1	0	1	1	1	1	1	0	1	1	1	1	1	1	1	1	1	1	1	0	0	1	1	1	1	1	0	1	1	1	1		966	x	x	966	966	966	x	x	x	x	966	966	966	966	966	966
967	1	1	0	1	1	1	0	0	0	1	1	1	1	1	1	1	1	1	0	1	0	0	1	1	1	1	1	0	1	0	1	1		967	x	x	967	967	967	x	x	x	x	967	967	967	967	967	967
968	1	1	0	1	1	1	0	0	0	1	1	1	1	1	1	1	1	1	0	1	0	0	1	1	1	1	1	1	1	0	0	1		968	x	x	968	968	968	x	x	x	x	968	968	968	968	968	968
969	1	0	1	1	1	1	1	0	0	1	1	1	1	1	1	1	1	1	1	1	0	1	1	1	1	1	1	0	1	1	0	1		969	x	969	969	969	969	x	x	x	x	969	969	969	969	969	969
970	1	1	1	1	1	1	0	0	0	0	1	1	1	1	1	1	1	1	0	1	0	0	1	0	1	0	0	1	1	1	0	1		970	x	970	970	970	970	x	x	x	x	970	970	970	970	970	970
971	1	1	1	1	1	1	1	1	1	0	1	1	1	1	1	1	1	1	0	1	1	0	1	1	1	0	1	1	1	0	0	1		971	x	971	971	971	971	971	x	x	x	971	971	971	971	971	971
972	1	0	1	1	1	1	1	1	0	0	1	1	1	1	1	1	1	1	1	1	0	0	1	0	1	1	1	0	1	1	0	1		972	x	972	972	972	972	972	x	x	x	972	972	972	972	972	972
973	1	1	1	1	1	1	1	0	0	1	1	1	1	1	1	1	1	1	0	1	1	1	1	0	1	1	0	0	1	1	0	1		973	973	x	973	973	973	973	x	x	973	973	973	973	973	973	973
974	1	1	1	1	1	1	1	1	0	1	1	1	1	1	1	1	1	1	0	1	1	1	1	0	1	1	1	1	1	1	0	1		974	974	x	974	974	974	974	974	x	974	974	974	974	974	974	974
975	1	1	1	1	1	1	1	1	0	1	1	1	1	1	1	1	1	1	1	1	1	1	0	1	1	1	1	1	1	1	0	1		x	975	x	975	975	975	975	975	x	975	975	975	975	975	975	975
976	1	1	1	1	1	1	1	1	0	1	1	1	1	1	1	1	1	1	1	1	0	1	0	0	1	1	1	1	1	0	0	1		x	976	x	976	976	976	976	976	x	976	976	976	976	976	976	976
977	1	1	0	1	1	1	1	1	0	1	1	1	1	1	1	1	1	1	1	1	1	1	0	0	1	1	1	1	1	1	0	1		x	977	x	977	977	977	977	977	x	977	977	977	977	977	977	977
978	1	1	0	1	1	1	1	1	0	1	1	1	1	1	1	1	1	1	1	1	0	1	0	0	1	1	1	1	1	1	1	1		x	978	x	978	978	978	978	978	x	978	978	978	978	978	978	978
979	0	1	1	1	1	1	1	1	0	1	1	1	1	1	1	1	1	1	1	0	1	1	0	0	1	1	1	1	1	1	1	1		x	979	979	979	979	979	979	979	x	979	979	979	979	979	979	979
980	0	1	1	1	1	1	1	1	0	1	1	1	1	1	1	1	1	1	1	1	1	1	0	0	1	1	1	1	1	1	0	1		x	980	980	980	980	980	980	980	x	980	980	980	980	x	980	980
981	0	1	1	1	1	1	1	1	0	1	1	1	1	1	1	1	1	1	1	0	1	1	0	0	1	1	1	1	1	1	1	1		x	981	981	981	981	981	981	981	x	981	981	981	981	x	981	981
982	0	1	1	1	1	1	1	1	0	1	1	1	1	1	1	1	1	1	1	1	1	1	0	0	1	1	1	1	1	0	1	1		x	982	982	982	982	982	982	982	x	982	982	982	982	x	982	982
983	0	1	1	1	1	1	1	1	0	1	1	1	1	1	1	1	1	1	1	0	0	1	0	0	1	1	1	1	1	1	1	1		x	983	983	983	983	983	983	983	x	983	983	983	983	x	983	983
984	0	1	1	1	1	1	1	1	0	1	1	1	1	0	1	1	1	1	1	1	0	1	1	1	1	1	1	1	1	1	1	1		x	984	984	984	984	984	984	984	x	984	984	984	984	x	984	984
985	0	1	1	1	1	1	1	1	0	1	1	1	1	0	1	1	1	1	1	0	0	1	0	0	1	1	1	1	1	1	0	1		x	985	985	985	985	985	985	x	x	985	985	985	985	x	985	985
986	0	1	1	1	1	1	1	1	0	1	1	1	1	0	1	1	0	1	1	1	0	1	0	0	1	1	1	1	1	1	1	1		x	986	986	986	986	986	986	x	x	986	986	986	986	x	986	986
987	0	1	1	1	1	1	1	1	0	1	1	1	1	1	1	1	0	1	1	0	0	1	0	1	1	1	1	1	1	0	1	1		x	987	987	987	987	987	987	x	x	987	987	987	987	987	987	987
988	0	1	1	1	1	1	1	1	0	1	1	1	1	1	1	1	0	1	1	1	0	1	1	1	1	1	1	1	1	1	1	1		x	988	x	988	988	988	988	x	x	988	988	988	988	988	988	988
989	0	1	1	1	1	1	1	0	0	1	1	1	1	1	1	1	1	1	1	1	0	1	1	1	1	1	1	1	1	1	1	1		x	989	x	989	989	989	989	x	x	989	989	989	989	989	989	989
990	0	1	1	1	1	1	1	0	0	1	1	1	1	1	1	1	1	1	1	0	1	1	0	1	1	1	1	1	1	1	1	1		x	990	x	990	990	990	x	x	x	990	990	990	990	990	990	990
991	0	1	1	1	1	1	1	0	0	1	1	1	1	1	1	1	1	1	1	0	1	1	0	1	1	1	1	1	1	1	1	1		x	991	x	991	991	991	x	x	x	991	991	991	991	991	991	991
992	0	1	0	1	1	1	1	1	0	1	1	1	1	1	1	1	1	1	1	0	0	1	0	1	1	1	1	1	1	1	1	1		x	992	x	992	992	992	x	x	x	992	992	992	992	992	992	992
993	0	1	0	1	1	1	1	1	0	1	1	1	1	1	1	1	1	1	1	1	0	1	0	1	1	1	1	1	1	1	1	1		x	993	x	993	993	993	x	x	x	993	993	993	993	993	993	993
994	0	1	1	1	1	1	0	1	0	1	1	1	1	1	1	1	1	1	1	1	0	1	0	1	1	0	1	1	1	0	1	1		x	994	994	994	994	994	x	x	x	994	994	994	994	994	994	994
995	0	1	1	1	1	1	0	0	0	1	1	1	1	1	1	1	1	1	1	1	0	1	0	1	1	0	0	1	1	1	1	1		x	995	995	995	995	995	x	x	x	995	995	995	995	995	995	995
996	0	1	1	1	1	1	1	1	1	1	1	1	1	1	1	1	1	1	1	1	1	1	0	1	1	1	0	1	1	1	1	1		x	996	996	996	996	996	996	996	996	996	996	996	996	996	996	996
997	0	1	1	1	1	1	1	1	1	1	1	1	1	1	1	1	1	1	1	1	1	1	1	1	1	1	0	1	1	1	1	1		x	997	997	997	997	997	997	997	997	997	997	997	997	997	997	997
998	0	1	1	1	1	1	1	1	1	1	1	1	1	1	1	1	1	1	1	1	1	1	0	1	1	1	0	1	1	1	1	1		x	998	998	998	998	998	998	998	998	998	998	998	998	998	998	998
999	0	1	1	1	1	1	1	1	1	1	1	1	1	1	1	1	1	1	1	1	1	1	1	0	1	1	1	1	1	1	1	1		x	999	999	999	999	999	999	999	999	999	999	999	999	999	999	999
1000	1	1	1	1	1	1	1	1	1	1	1	1	1	1	1	1	1	1	1	1	1	1	1	1	1	1	1	1	1	1	1	1		1000	1000	1000	1000	1000	1000	1000	1000	1000	1000	1000	1000	1000	1000	1000	1000
1001	1	1	1	1	1	1	1	1	1	1	1	1	1	1	1	1	1	1	1	1	1	1	1	1	1	1	1	1	1	1	1	1		1001	1001	1001	1001	1001	1001	1001	1001	1001	1001	1001	1001	1001	1001	1001	1001
1002	1	1	1	1	1	1	1	1	1	1	1	1	1	1	1	1	1	1	1	1	0	1	1	1	1	1	1	1	1	1	1	1		1002	1002	1002	1002	1002	x	x	1002	1002	x	1002	1002	1002	1002	1002	1002
1003	1	1	1	1	1	1	1	1	1	1	1	1	1	1	1	1	1	1	1	1	0	1	1	1	1	1	1	1	1	0	1	1		1003	1003	1003	1003	1003	x	x	1003	1003	x	1003	1003	1003	1003	1003	1003
1004	1	1	1	1	1	1	1	1	1	1	1	1	1	1	1	1	0	1	1	1	0	1	1	1	1	1	1	1	1	1	1	1		x	1004	1004	1004	1004	x	x	1004	1004	x	1004	1004	1004	1004	1004	1004
1005	1	1	1	1	1	1	1	1	1	1	1	1	1	1	1	1	1	1	1	1	1	1	1	0	1	1	1	1	1	1	1	1		x	1005	x	1005	1005	x	x	1005	1005	x	1005	1005	1005	1005	1005	1005
1006	1	1	1	1	1	0	0	1	1	0	1	1	1	1	1	1	1	1	1	1	0	1	1	0	1	1	1	1	1	1	1	1		x	1006	x	1006	1006	x	x	1006	1006	x	1006	1006	1006	1006	1006	1006
1007	1	1	1	1	1	0	1	1	1	1	1	1	1	1	1	1	1	1	1	1	0	1	1	1	1	1	1	1	1	1	1	1		x	1007	x	1007	1007	x	1007	1007	1007	x	1007	1007	1007	1007	1007	1007
1008	0	1	1	1	1	1	1	1	1	1	1	1	1	1	1	1	1	1	1	1	0	1	1	1	1	1	1	1	1	1	1	1		x	1008	x	1008	1008	1008	1008	1008	1008	x	1008	1008	1008	1008	1008	1008
1009	0	1	0	1	1	1	1	1	1	0	1	1	1	1	1	1	1	1	1	1	1	1	1	1	1	1	1	1	1	1	1	1		x	1009	x	1009	1009	1009	1009	x	1009	x	1009	1009	1009	1009	1009	1009
1010	0	1	0	1	1	1	1	1	1	1	1	1	1	1	1	1	1	1	1	1	1	1	1	1	1	1	1	0	1	1	1	1		x	1010	x	1010	1010	1010	1010	x	1010	1010	1010	1010	1010	1010	1010	1010
1011	0	1	1	1	1	1	1	1	1	1	1	1	1	1	1	1	1	1	1	1	1	1	1	1	1	1	1	1	1	1	1	1		x	1011	x	1011	1011	1011	1011	x	1011	1011	1011	1011	1011	1011	1011	1011
1012	0	1	1	1	1	1	1	1	1	1	1	1	1	1	1	1	1	1	1	1	1	1	1	1	1	1	1	1	1	0	1	1		x	1012	x	1012	1012	1012	1012	x	1012	1012	1012	1012	1012	1012	1012	1012
1013	0	1	0	1	1	1	1	0	1	1	1	1	1	1	1	1	1	1	1	1	1	1	1	0	1	1	1	1	1	1	1	1		x	1013	x	1013	1013	1013	1013	x	1013	1013	1013	1013	1013	1013	1013	1013
1014	0	1	1	1	1	1	1	1	1	1	1	1	1	1	1	1	1	1	1	1	1	1	1	1	1	1	1	1	1	1	1	1		x	1014	x	1014	1014	1014	1014	x	1014	1014	1014	1014	1014	1014	1014	1014
1015	0	1	1	1	1	1	1	0	1	1	1	1	1	1	1	1	1	1	1	1	1	1	1	1	1	1	1	1	1	1	1	1		x	1015	x	1015	1015	1015	1015	x	1015	1015	1015	1015	1015	1015	1015	1015
1016	1	1	0	1	1	1	1	0	1	1	1	1	1	1	1	1	1	1	1	1	1	1	1	1	1	1	1	1	1	1	1	1		x	1016	x	1016	1016	1016	1016	x	1016	1016	1016	1016	1016	1016	1016	1016
1017	1	1	1	1	1	1	1	1	1	1	1	1	1	1	1	1	1	1	1	1	1	1	1	1	1	1	1	1	1	1	1	1		x	1017	x	1017	1017	1017	1017	x	1017	1017	1017	1017	1017	1017	1017	1017
1018	1	1	1	1	1	1	1	0	1	1	1	1	1	1	1	1	1	1	1	1	1	1	1	1	1	1	1	1	1	1	0	1		x	1018	x	1018	1018	1018	1018	x	1018	1018	1018	1018	1018	1018	1018	1018
1019	0	1	0	1	1	1	1	0	1	1	1	1	1	1	1	1	1	1	1	0	1	1	1	1	1	0	1	1	1	1	1	1		x	1019	x	1019	1019	1019	1019	x	1019	1019	1019	1019	1019	1019	1019	1019
1020	0	1	1	1	1	1	1	0	1	1	1	1	1	1	1	1	1	1	1	0	1	1	1	1	1	0	1	1	1	1	0	1		x	1020	x	1020	1020	1020	1020	x	1020	1020	1020	1020	1020	1020	1020	1020
1021	0	1	1	1	1	1	1	0	1	1	1	1	1	1	1	1	1	1	1	0	1	1	1	1	1	0	1	1	1	1	0	1		x	1021	x	1021	1021	1021	1021	x	1021	1021	1021	1021	1021	1021	1021	1021
1022	0	1	0	1	1	1	1	0	1	1	1	1	1	1	1	1	1	1	1	1	1	1	1	0	1	0	1	1	1	1	1	1		x	1022	x	1022	1022	1022	1022	x	1022	1022	1022	1022	1022	1022	1022	1022
1023	0	1	0	1	1	1	1	1	1	1	1	1	1	1	1	1	1	1	1	1	1	1	1	1	1	0	1	1	1	1	0	1		x	1023	x	1023	1023	1023	1023	x	1023	1023	1023	1023	1023	1023	1023	1023
1024	0	1	0	1	1	1	1	0	1	1	1	1	1	1	1	1	1	1	1	0	1	1	1	1	1	0	1	1	1	1	1	1		x	1024	x	1024	1024	1024	1024	x	1024	1024	1024	1024	1024	1024	1024	1024
1025	0	1	0	1	1	1	1	1	1	1	1	1	1	1	1	1	1	1	1	1	1	1	1	1	1	0	1	1	1	1	1	1		x	1025	x	1025	1025	1025	1025	x	1025	1025	1025	1025	1025	1025	1025	1025
1026	0	1	1	1	1	1	1	1	1	1	1	1	1	1	1	1	1	1	1	1	1	1	1	0	1	0	1	1	1	1	1	1		x	1026	x	1026	1026	1026	1026	x	1026	1026	1026	1026	1026	1026	1026	1026
1027	1	1	1	1	1	1	1	1	1	1	1	1	1	1	1	1	1	1	1	0	1	1	1	1	1	0	1	1	1	1	1	1		1027	1027	x	1027	1027	1027	1027	x	1027	1027	1027	1027	1027	1027	1027	1027
1028	1	1	1	1	1	1	1	0	1	1	1	1	1	1	1	1	1	1	1	0	1	1	1	1	1	0	1	1	1	1	1	1		1028	1028	x	1028	1028	1028	1028	x	1028	1028	1028	1028	1028	1028	1028	1028
1029	1	1	1	1	1	1	1	1	1	1	1	1	1	1	1	1	1	1	1	0	0	1	1	1	1	1	1	1	1	1	1	1		1029	1029	x	1029	1029	1029	1029	x	1029	1029	1029	1029	1029	1029	1029	1029
1030	1	1	0	1	1	1	1	0	1	1	1	1	1	1	1	1	1	1	1	0	0	1	1	0	1	1	1	1	1	1	1	1		1030	1030	x	1030	1030	1030	1030	x	1030	1030	1030	1030	1030	1030	1030	1030
1031	1	1	0	1	1	1	1	1	1	1	1	1	1	1	1	1	1	1	1	0	0	1	1	1	1	1	1	1	1	1	1	1		1031	1031	x	1031	1031	1031	1031	1031	1031	1031	1031	1031	1031	1031	1031	1031
1032	1	1	0	1	1	1	1	1	1	1	1	1	1	1	1	1	1	1	1	0	0	1	1	1	1	0	1	1	1	1	1	1		1032	1032	x	1032	1032	1032	1032	1032	1032	1032	1032	1032	1032	1032	1032	1032
1033	1	1	1	1	1	1	1	1	1	1	1	1	1	1	1	1	1	1	1	0	0	1	1	1	1	1	1	1	1	1	1	1		1033	1033	1033	1033	1033	1033	1033	1033	1033	1033	1033	1033	1033	1033	1033	1033
1034	1	1	1	1	1	1	1	1	1	1	1	1	1	1	1	1	1	1	1	0	0	1	1	1	1	1	1	1	1	1	1	1		1034	1034	1034	1034	1034	1034	1034	1034	1034	1034	1034	1034	1034	1034	1034	1034
1035	1	1	1	1	1	1	1	1	1	1	1	1	1	1	1	1	1	1	1	1	0	1	1	0	1	1	1	1	1	1	1	1		1035	1035	1035	1035	1035	1035	1035	1035	1035	1035	1035	1035	1035	1035	1035	1035
1036	1	1	1	1	1	1	1	1	1	1	1	1	1	1	1	1	1	1	1	1	0	1	1	1	0	1	1	1	1	1	1	1		1036	1036	1036	1036	1036	1036	1036	1036	1036	1036	1036	1036	1036	1036	1036	1036
1037	1	1	1	1	1	1	1	1	1	1	1	1	1	1	1	1	1	1	1	1	0	1	1	1	0	1	1	1	1	1	1	1		1037	1037	1037	1037	1037	1037	1037	1037	1037	1037	1037	1037	1037	1037	1037	1037
1038	1	1	1	1	1	1	1	1	1	1	1	1	1	1	1	1	1	1	1	1	0	1	1	1	1	1	1	1	1	1	1	1		1038	1038	1038	1038	1038	1038	1038	1038	1038	1038	1038	1038	1038	1038	1038	1038
1039	1	1	1	1	1	1	1	1	1	1	1	1	1	1	1	1	1	1	1	1	0	1	1	1	1	1	1	1	1	1	1	1		1039	1039	1039	1039	1039	1039	1039	1039	1039	x	1039	1039	1039	1039	1039	1039
1040	1	1	1	1	1	1	1	1	1	1	1	1	1	1	1	1	1	1	1	1	0	1	1	1	1	1	1	1	1	1	1	1		1040	x	1040	1040	1040	1040	1040	1040	1040	x	1040	1040	1040	1040	1040	1040
1041	1	1	1	1	1	1	1	1	1	1	1	1	1	1	1	1	1	1	1	1	0	1	1	1	1	1	1	1	1	1	1	1		1041	x	1041	1041	1041	1041	1041	1041	1041	x	1041	1041	1041	1041	1041	1041
1042	1	1	1	1	1	1	1	1	1	1	1	1	1	1	1	1	1	1	1	1	0	1	1	1	1	1	1	1	1	1	1	1		x	x	1042	1042	1042	x	1042	1042	1042	x	x	1042	1042	1042	1042	1042
1043	1	1	1	1	1	1	1	1	1	0	1	1	1	1	1	1	1	1	1	1	0	1	1	0	1	1	1	1	1	1	1	1		x	x	1043	1043	1043	x	1043	1043	1043	x	x	1043	1043	1043	1043	x
1044	1	0	1	1	1	1	1	1	1	1	1	1	1	1	1	1	1	0	1	1	0	1	1	1	0	1	1	1	1	1	1	1		x	x	1044	1044	1044	x	1044	x	1044	x	x	1044	1044	1044	1044	x
1045	1	0	1	1	1	1	1	1	1	0	1	1	1	1	1	1	1	1	1	1	0	1	1	0	0	1	1	1	1	1	1	1		x	x	1045	1045	1045	x	1045	x	1045	x	x	1045	1045	1045	1045	x
1046	0	1	1	1	1	0	1	1	1	1	0	1	1	1	1	1	1	1	1	1	0	1	1	1	1	1	1	1	1	1	1	1		x	x	1046	1046	1046	x	1046	x	1046	x	x	1046	1046	1046	1046	x
1047	0	1	1	1	1	0	1	1	1	0	1	1	1	1	1	0	1	1	1	1	0	1	1	0	1	1	1	1	1	1	1	1		x	x	1047	1047	1047	x	1047	x	1047	x	1047	1047	1047	1047	1047	x
1048	0	0	1	1	1	0	1	0	1	0	1	1	1	1	1	1	1	1	1	1	0	1	1	1	1	1	0	1	1	1	1	1		x	x	1048	1048	1048	x	1048	x	1048	x	1048	1048	1048	1048	1048	1048
1049	0	0	1	1	1	0	1	1	1	0	1	1	1	1	1	1	1	0	1	1	0	1	1	1	1	1	0	1	1	1	1	1		x	x	1049	1049	1049	x	1049	x	1049	x	1049	1049	1049	1049	1049	1049
1050	0	0	1	1	1	0	1	0	1	1	1	1	1	1	1	1	1	1	1	1	0	1	1	1	0	1	1	1	1	1	1	1		x	x	x	1050	1050	x	1050	x	1050	1050	1050	1050	1050	1050	1050	x
1051	0	0	1	1	1	1	1	0	1	1	1	1	1	1	1	1	1	1	1	1	0	1	1	1	1	1	0	1	1	1	1	1		x	x	x	1051	1051	1051	x	x	1051	1051	1051	1051	1051	1051	1051	x
1052	0	1	1	1	1	1	1	0	1	1	1	1	1	1	1	1	1	1	1	1	0	1	1	1	1	1	0	0	1	1	1	1		x	x	x	1052	1052	1052	x	x	1052	1052	1052	1052	1052	1052	1052	x
1053	0	1	1	1	1	1	1	0	1	1	1	1	1	1	1	1	1	1	1	1	0	1	1	1	1	1	1	0	1	1	1	1		x	x	x	1053	1053	1053	x	x	1053	1053	1053	1053	1053	1053	1053	x
1054	0	0	0	1	1	1	1	0	1	1	1	1	1	1	1	0	1	1	1	1	0	1	1	0	1	1	0	0	1	1	1	1		x	x	x	1054	1054	1054	x	x	1054	1054	1054	1054	1054	1054	1054	x
1055	1	1	0	1	1	1	0	1	1	1	1	1	1	1	1	1	1	1	1	1	0	1	1	1	1	1	1	0	1	1	1	1		x	x	x	1055	1055	1055	x	x	1055	1055	1055	1055	1055	1055	x	1055
1056	0	0	0	1	1	1	0	0	1	1	1	1	1	1	1	1	1	1	1	1	0	1	1	1	1	1	0	1	1	1	1	1		x	x	x	1056	1056	1056	x	x	1056	x	1056	1056	1056	1056	x	1056
1057	0	1	0	1	1	1	0	0	1	1	1	1	1	1	1	1	1	1	1	1	0	1	1	1	1	1	1	0	1	1	1	1		x	x	x	1057	1057	1057	x	x	1057	x	1057	1057	1057	1057	x	1057
1058	0	0	0	1	1	1	1	1	1	1	1	1	1	1	1	1	1	1	1	1	0	1	1	1	1	1	0	0	1	1	1	1		x	x	x	1058	1058	1058	1058	x	1058	x	1058	1058	1058	1058	x	1058
1059	0	0	0	1	1	1	1	0	1	1	1	1	1	1	0	1	1	1	1	1	0	1	1	1	1	1	0	0	1	1	1	1		x	x	x	1059	1059	1059	x	x	1059	x	1059	1059	1059	1059	x	1059
1060	1	0	0	1	1	1	1	0	1	0	1	1	1	1	1	1	1	1	1	1	0	1	1	1	1	1	0	0	1	1	1	1		x	x	x	1060	1060	1060	x	x	1060	x	1060	1060	1060	1060	x	1060
1061	0	0	0	1	1	1	1	1	1	1	1	1	1	1	1	1	1	1	1	1	0	1	1	1	1	1	1	0	1	1	1	1		x	x	x	1061	1061	1061	x	1061	1061	x	1061	1061	1061	1061	x	1061
1062	0	1	0	1	1	1	1	1	1	1	1	1	1	1	0	1	1	1	1	1	0	1	0	1	1	1	1	1	1	1	1	1		x	x	x	1062	1062	1062	x	1062	1062	x	1062	1062	1062	1062	x	1062
1063	0	0	0	1	1	1	0	1	1	1	1	1	1	1	1	1	0	1	1	1	0	1	0	1	1	1	1	1	1	1	1	1		x	x	x	1063	1063	1063	x	1063	1063	x	1063	1063	1063	1063	1063	x
1064	0	0	0	1	1	1	0	1	1	1	1	1	1	1	1	1	1	1	1	1	0	1	1	1	1	1	1	1	1	1	1	1		x	x	x	1064	1064	1064	x	1064	1064	x	1064	1064	1064	1064	1064	x
1065	0	1	0	1	1	1	0	1	1	0	1	1	1	1	1	1	1	1	1	1	0	1	1	1	1	1	0	1	1	1	1	1		x	1065	x	1065	1065	1065	x	1065	1065	x	1065	1065	1065	1065	1065	x
1066	0	1	1	1	1	1	1	1	1	1	1	1	1	1	1	1	1	1	1	1	0	1	0	1	1	1	0	1	1	1	1	1		x	1066	x	1066	1066	1066	1066	1066	1066	x	1066	1066	1066	1066	1066	x
1067	0	1	0	1	1	1	1	1	1	1	1	1	1	1	1	0	1	1	1	1	0	1	0	1	1	1	1	1	1	1	1	1		x	1067	x	1067	1067	1067	1067	1067	1067	x	1067	1067	1067	1067	1067	x
1068	1	1	0	1	1	1	1	1	1	1	1	1	1	1	1	1	1	1	1	1	0	1	0	1	1	1	0	1	1	1	1	1		x	1068	x	1068	1068	1068	1068	1068	1068	x	1068	1068	1068	1068	1068	1068
1069	0	1	1	1	1	1	1	1	1	0	1	1	1	1	1	1	1	1	1	1	0	1	0	1	1	1	1	1	1	1	1	1		x	1069	1069	1069	1069	1069	1069	1069	1069	x	1069	1069	1069	1069	1069	1069
1070	1	1	1	1	1	1	1	1	1	1	1	1	1	1	1	1	1	1	1	1	0	1	0	1	1	1	0	1	1	1	1	1		x	1070	x	1070	1070	1070	1070	1070	1070	x	1070	1070	1070	1070	1070	x
1071	1	1	1	1	1	1	1	1	1	0	1	1	1	1	1	1	1	1	1	1	0	1	0	1	1	1	1	1	1	1	1	1		x	1071	x	1071	1071	1071	1071	1071	1071	x	1071	1071	1071	1071	1071	x
1072	0	1	1	1	1	1	1	1	1	1	1	1	1	1	1	1	0	1	1	1	0	1	0	1	1	1	1	1	1	1	0	1		x	1072	x	1072	1072	1072	1072	1072	1072	x	1072	1072	1072	1072	1072	x
1073	1	1	1	1	1	1	1	1	1	1	1	1	1	1	1	1	0	1	1	1	0	1	0	1	1	1	0	1	1	1	0	1		1073	1073	x	1073	1073	1073	1073	1073	1073	x	1073	1073	1073	1073	1073	x
1074	1	1	0	1	1	1	1	1	1	1	1	1	1	1	1	0	0	1	1	1	0	1	0	1	1	1	1	1	1	1	1	1		1074	1074	x	1074	1074	1074	1074	1074	1074	x	1074	1074	1074	1074	1074	x
1075	1	1	1	1	1	1	1	1	1	1	1	1	1	1	1	1	0	1	1	1	0	1	0	1	1	1	1	1	1	1	0	1		1075	1075	1075	1075	1075	1075	1075	1075	1075	x	1075	1075	1075	1075	1075	x
1076	1	1	1	1	1	1	1	1	1	0	1	1	1	1	1	1	0	1	1	1	0	1	1	1	1	1	1	1	1	1	1	1		x	1076	1076	1076	1076	1076	1076	1076	1076	x	1076	1076	1076	1076	1076	x
1077	1	1	1	1	1	1	1	1	1	0	1	1	1	1	1	1	1	1	1	1	0	1	0	1	1	1	0	1	1	1	0	1		x	1077	1077	1077	1077	1077	1077	1077	1077	x	1077	1077	1077	1077	1077	x
1078	1	1	1	1	1	1	1	1	1	1	1	1	1	1	1	0	1	1	1	1	0	1	0	1	1	0	1	1	1	1	1	0		x	1078	1078	1078	1078	1078	1078	1078	1078	x	1078	1078	1078	1078	1078	x
1079	1	1	1	1	1	1	1	1	1	1	1	1	1	1	1	1	1	1	1	1	0	1	0	1	1	1	1	1	1	1	1	0		x	1079	1079	1079	1079	1079	1079	1079	1079	x	1079	1079	1079	1079	1079	1079
1080	0	1	1	1	1	1	1	1	1	1	1	1	1	1	1	1	1	1	1	1	0	1	0	1	1	0	1	1	1	1	1	1		x	1080	1080	1080	1080	1080	1080	1080	1080	x	1080	1080	1080	1080	1080	1080
1081	0	1	1	1	1	1	1	1	1	1	1	1	1	1	1	1	1	1	1	1	0	1	0	1	1	0	0	1	1	1	1	1		x	1081	1081	1081	1081	1081	1081	1081	1081	x	1081	1081	1081	1081	1081	1081
1082	0	1	1	1	1	1	1	1	1	0	1	1	1	1	1	1	1	1	1	0	0	1	0	1	1	0	0	1	1	1	1	1		x	1082	1082	1082	1082	1082	1082	1082	1082	x	1082	1082	1082	1082	1082	1082
1083	0	1	1	1	1	1	1	1	1	1	1	1	1	1	1	1	1	1	1	1	0	1	0	1	1	0	0	1	1	1	1	0		x	1083	1083	1083	1083	1083	1083	1083	1083	x	1083	1083	1083	1083	1083	1083
1084	0	1	1	1	1	1	1	1	1	1	1	1	1	1	1	1	1	1	1	1	0	1	0	1	1	0	0	1	1	1	1	1		x	1084	1084	1084	1084	x	1084	1084	1084	x	1084	1084	1084	1084	1084	1084
1085	1	1	1	1	1	1	1	1	1	1	1	1	1	1	1	1	1	1	1	1	0	1	1	1	1	0	0	1	1	1	1	0		1085	1085	x	1085	1085	x	1085	1085	1085	x	1085	1085	1085	1085	1085	1085
1086	1	1	1	1	1	1	1	1	1	0	1	1	1	1	1	1	1	1	1	1	0	1	1	1	1	1	0	1	1	1	1	0		1086	1086	x	1086	1086	x	1086	1086	1086	x	x	1086	1086	1086	1086	1086
1087	1	1	1	1	1	1	1	1	1	1	1	1	1	1	1	1	1	1	1	1	1	0	0	1	1	1	0	1	1	1	1	1		1087	1087	x	1087	1087	x	1087	1087	1087	x	x	1087	1087	1087	1087	x
1088	1	1	1	1	1	0	1	1	1	1	1	1	1	1	1	1	1	1	1	1	0	0	1	1	1	1	1	1	1	1	1	1		1088	1088	x	1088	1088	x	1088	1088	1088	x	x	1088	1088	1088	1088	x
1089	1	1	0	1	1	0	1	1	1	1	1	1	1	1	1	1	1	1	1	1	0	1	1	1	1	1	1	1	1	1	1	1		1089	1089	x	1089	1089	x	1089	1089	1089	x	x	1089	1089	1089	1089	x
1090	1	1	0	1	1	1	1	1	1	0	0	1	1	1	1	1	1	1	1	1	0	1	1	1	0	1	1	1	1	1	1	1		1090	1090	x	1090	1090	1090	1090	1090	1090	x	x	1090	1090	1090	1090	x
1091	1	1	0	1	1	1	1	1	1	1	0	1	1	1	1	0	1	1	1	1	0	1	1	1	1	1	1	1	1	1	1	0		1091	1091	x	1091	1091	1091	1091	1091	1091	x	x	1091	1091	1091	1091	x
1092	1	1	0	1	1	1	1	1	1	1	1	1	1	1	1	1	1	1	1	1	0	1	1	1	0	1	0	1	1	1	1	1		x	1092	x	1092	1092	1092	1092	1092	1092	x	x	1092	1092	1092	1092	x
1093	1	1	0	1	1	1	1	1	1	1	1	1	1	1	1	1	1	1	1	1	0	1	1	1	1	1	0	1	1	1	1	1		x	1093	x	1093	1093	1093	1093	1093	1093	x	x	1093	1093	1093	1093	x
1094	1	1	0	1	1	1	1	1	1	0	1	1	1	1	1	1	1	1	1	1	0	1	1	1	1	1	0	1	1	1	1	1		x	1094	x	1094	1094	1094	1094	1094	1094	x	x	1094	1094	1094	1094	x
1095	1	1	0	1	1	1	1	1	1	1	1	1	1	1	1	0	1	1	1	1	0	1	0	1	1	1	1	1	1	1	1	1		x	1095	x	1095	1095	1095	1095	1095	1095	x	x	1095	1095	1095	1095	x
1096	0	1	0	1	1	1	1	1	1	1	0	1	1	1	1	1	1	1	1	1	0	1	0	1	1	1	0	1	1	1	1	1		x	1096	x	1096	1096	1096	x	1096	1096	x	x	1096	1096	1096	1096	1096
1097	0	1	0	1	1	1	1	1	1	0	0	1	1	1	1	1	1	1	1	1	1	1	0	1	1	1	1	1	1	1	1	1		x	1097	x	1097	1097	1097	x	1097	1097	x	x	1097	1097	1097	1097	1097
1098	0	1	1	1	1	1	1	1	1	0	1	1	1	1	1	1	1	1	1	1	1	1	0	1	1	1	1	1	1	1	1	1		x	1098	x	1098	1098	1098	x	x	1098	x	x	1098	1098	1098	1098	1098
1099	1	1	0	1	1	1	1	1	1	1	1	1	1	1	1	1	1	1	1	1	1	1	0	1	1	1	1	1	1	1	1	1		1099	1099	x	1099	1099	1099	x	x	1099	1099	x	1099	1099	1099	1099	1099
1100	1	1	0	1	1	1	0	1	1	1	0	1	1	1	1	1	1	1	1	1	1	1	0	1	1	0	1	1	1	1	1	1		1100	1100	x	1100	1100	1100	x	x	1100	1100	x	1100	1100	1100	1100	1100
1101	1	1	0	1	1	1	1	1	1	1	1	1	1	1	1	1	1	0	1	1	1	1	0	1	1	1	1	1	1	1	1	1		1101	1101	x	1101	1101	1101	x	x	1101	1101	1101	1101	1101	1101	1101	1101
1102	1	1	0	1	1	1	1	0	1	1	1	1	1	1	1	1	1	1	1	1	1	1	0	1	1	1	1	1	1	1	1	1		1102	1102	x	1102	1102	1102	x	x	1102	1102	1102	1102	1102	1102	1102	1102
1103	1	1	0	1	1	1	1	0	1	1	1	1	1	1	1	1	1	0	1	1	1	1	0	1	1	0	1	1	1	1	1	1		1103	1103	x	1103	1103	1103	x	x	1103	1103	1103	1103	1103	1103	1103	1103
1104	1	1	0	1	1	1	0	0	1	1	1	1	1	1	1	1	1	1	1	1	1	1	0	1	1	0	1	1	1	1	1	1		1104	1104	x	1104	1104	1104	x	x	1104	1104	1104	1104	1104	1104	1104	1104
1105	1	1	1	1	1	1	0	1	1	1	1	1	1	1	1	1	1	0	1	1	1	1	1	1	1	0	1	1	1	1	1	1		1105	1105	x	1105	1105	1105	x	1105	1105	1105	1105	1105	1105	1105	1105	1105
1106	1	1	1	1	1	1	1	1	1	1	1	1	1	1	1	1	1	1	1	1	1	1	0	1	1	1	1	1	1	1	1	1		1106	1106	x	1106	1106	1106	1106	1106	1106	1106	1106	1106	1106	1106	1106	1106
1107	1	1	1	1	1	1	1	1	1	1	1	1	1	1	1	1	1	0	1	1	1	1	1	1	1	1	0	1	1	1	1	1		1107	1107	x	1107	1107	1107	1107	1107	1107	1107	1107	1107	1107	1107	1107	1107
1108	1	1	0	1	1	1	1	1	1	1	1	1	1	1	1	1	1	1	1	1	1	1	1	1	1	1	0	1	1	1	1	1		1108	1108	x	1108	1108	1108	1108	1108	1108	1108	1108	1108	1108	1108	1108	1108
1109	1	1	0	1	1	1	1	1	1	1	1	1	1	1	1	1	1	0	1	1	1	1	0	1	1	1	1	1	1	1	1	1		1109	1109	x	1109	1109	1109	1109	x	1109	1109	1109	1109	1109	1109	1109	1109
1110	1	1	0	1	1	1	1	1	1	1	1	1	1	1	1	1	1	0	1	1	1	1	1	0	1	1	0	1	1	1	1	1		1110	1110	x	1110	1110	1110	1110	x	1110	1110	1110	1110	1110	1110	1110	1110
1111	1	1	0	1	1	1	1	1	1	1	1	1	1	1	1	1	1	0	1	1	1	1	0	1	1	1	0	1	1	1	1	1		1111	1111	x	1111	1111	1111	1111	x	1111	1111	x	1111	1111	1111	1111	1111
1112	1	1	0	1	1	1	1	1	1	1	1	1	1	1	1	1	1	0	0	1	1	1	0	0	1	1	0	1	1	1	0	1		x	1112	x	1112	1112	1112	1112	x	1112	1112	x	1112	1112	1112	1112	x
1113	1	1	1	1	1	1	1	0	1	1	1	1	1	1	1	1	1	0	0	1	1	1	1	0	1	1	0	1	1	1	1	1		x	1113	x	1113	1113	1113	1113	x	1113	1113	x	1113	1113	1113	1113	x
1114	1	1	1	1	1	1	1	0	1	1	1	1	1	1	1	1	1	0	0	1	1	1	1	0	1	0	0	0	1	1	1	1		x	1114	x	1114	1114	1114	1114	x	1114	1114	x	1114	1114	1114	1114	x
1115	1	1	1	1	1	1	1	0	1	1	0	1	1	1	1	1	1	1	0	1	1	1	0	0	1	1	0	0	1	1	1	1		x	1115	x	1115	1115	1115	1115	x	1115	1115	x	1115	1115	1115	1115	x
1116	0	1	0	1	1	1	1	0	1	1	1	1	1	1	1	0	1	0	0	1	1	1	0	0	1	1	0	0	1	1	0	1		x	1116	x	1116	1116	1116	1116	x	x	1116	1116	1116	1116	1116	1116	x
1117	0	1	1	1	1	1	1	0	1	1	1	1	1	1	1	1	1	1	0	1	1	0	0	0	1	1	1	1	1	1	1	1		x	1117	x	1117	1117	1117	1117	x	x	1117	1117	1117	1117	1117	1117	1117
1118	1	1	0	1	1	1	1	0	1	1	1	1	1	1	1	1	1	1	0	1	1	1	0	0	1	0	0	0	1	1	1	1		x	1118	x	1118	1118	1118	1118	x	x	1118	1118	1118	1118	1118	1118	1118
1119	0	1	0	1	1	1	1	0	1	1	1	1	1	1	1	1	1	1	0	1	1	1	0	1	1	1	1	1	1	1	1	1		x	1119	x	1119	1119	1119	1119	x	x	1119	1119	1119	1119	1119	1119	1119
1120	0	1	0	1	1	1	1	0	0	1	1	1	1	1	1	1	1	1	1	1	1	1	1	0	1	1	1	1	1	1	1	1		x	1120	x	1120	1120	1120	1120	x	x	1120	1120	1120	1120	1120	1120	1120
1121	0	1	1	1	1	1	1	0	1	1	1	1	1	1	1	1	1	1	0	1	1	1	1	0	1	1	1	1	1	1	1	1		x	1121	x	1121	1121	1121	1121	x	1121	1121	1121	1121	1121	1121	1121	1121
1122	0	1	0	1	1	1	1	0	1	1	1	1	1	1	1	1	1	1	0	1	1	1	1	0	1	1	0	0	1	1	1	1		x	1122	x	1122	1122	1122	1122	x	1122	1122	1122	1122	1122	1122	1122	1122
1123	1	1	0	1	1	1	1	1	1	1	1	1	1	1	1	1	1	1	0	1	1	1	1	1	1	1	1	0	1	1	1	1		x	1123	x	1123	1123	1123	1123	1123	1123	1123	1123	1123	1123	1123	1123	1123
1124	0	1	1	1	1	1	1	1	1	1	1	1	1	1	1	1	1	1	0	1	1	1	1	1	1	1	1	0	1	1	1	0		x	1124	x	1124	1124	1124	1124	1124	1124	1124	x	1124	1124	x	1124	1124
1125	0	1	1	1	1	1	1	1	1	1	1	1	1	1	1	1	1	1	1	1	1	1	1	0	1	1	1	0	1	1	1	0		x	1125	x	1125	1125	1125	1125	1125	1125	1125	x	1125	1125	x	1125	1125
1126	0	1	1	1	1	1	1	1	1	1	1	1	1	1	1	1	1	1	1	1	1	1	1	0	1	1	1	0	1	1	1	0		x	1126	x	1126	1126	1126	1126	1126	1126	1126	x	1126	1126	x	1126	1126
1127	0	1	0	1	1	1	1	1	1	1	1	1	1	1	1	1	1	1	1	1	1	1	1	1	1	0	1	1	1	1	1	0		x	x	x	1127	1127	1127	1127	1127	1127	1127	x	1127	1127	x	1127	1127
1128	0	1	0	1	1	1	1	1	1	1	0	1	1	0	1	1	1	1	1	1	1	1	1	1	1	1	0	1	1	1	1	0		x	x	x	1128	1128	1128	1128	1128	1128	1128	x	1128	1128	x	1128	1128
1129	0	1	0	1	1	1	1	1	1	1	0	1	1	0	1	1	1	1	1	1	1	1	0	1	1	1	1	0	1	1	1	1		x	x	x	1129	1129	1129	1129	1129	1129	1129	x	1129	1129	x	1129	1129
1130	0	1	0	1	1	1	1	1	1	1	1	1	1	0	1	1	1	1	1	1	1	1	1	1	1	1	0	0	1	1	1	1		x	x	x	1130	1130	1130	1130	1130	1130	1130	1130	1130	1130	x	1130	1130
1131	1	0	0	1	1	1	1	1	1	1	1	1	1	0	1	1	1	1	1	1	1	1	0	1	1	1	1	1	1	1	1	1		x	x	x	1131	1131	1131	1131	1131	1131	1131	1131	1131	1131	x	1131	1131
1132	1	0	0	1	1	1	1	1	1	1	1	1	1	0	1	1	1	1	1	1	1	1	1	1	1	1	1	1	1	1	1	0		x	x	x	1132	1132	1132	1132	1132	1132	1132	1132	1132	1132	x	1132	1132
1133	0	1	0	1	1	1	1	1	1	1	1	1	1	1	1	1	1	1	1	1	1	1	0	1	1	1	1	1	1	1	1	0		x	x	x	1133	1133	x	1133	1133	1133	1133	1133	1133	1133	1133	1133	1133
1134	1	1	0	1	1	1	1	1	1	1	1	1	1	1	1	1	1	1	1	1	1	1	1	1	0	0	1	1	1	1	1	1		x	x	x	1134	1134	x	1134	1134	1134	1134	x	1134	1134	1134	1134	1134
1135	1	0	0	1	1	1	1	1	1	1	1	1	1	1	1	1	1	1	1	1	1	1	1	1	0	0	1	1	1	1	1	0		x	x	x	1135	1135	x	1135	1135	1135	1135	x	1135	1135	1135	1135	1135
1136	0	0	0	1	1	1	1	1	1	1	1	1	1	1	1	1	1	1	1	1	1	1	1	1	0	0	0	1	1	1	1	0		x	x	x	1136	1136	x	1136	1136	1136	1136	x	1136	1136	1136	1136	1136
1137	0	0	0	1	1	0	1	1	1	1	1	1	1	1	1	1	1	1	1	1	1	1	1	1	1	1	0	1	1	1	1	0		x	x	x	1137	1137	x	1137	1137	1137	1137	x	1137	1137	1137	1137	1137
1138	0	0	0	1	1	0	1	1	1	1	0	1	1	1	1	1	1	1	1	1	1	1	1	1	1	0	1	1	1	1	1	0		x	x	x	1138	1138	x	1138	1138	1138	1138	x	1138	1138	1138	1138	1138
1139	1	1	0	1	1	0	1	1	1	1	1	1	1	1	1	1	1	1	1	1	1	1	1	1	1	1	1	1	1	1	1	0		x	x	x	1139	1139	x	1139	1139	1139	1139	x	1139	1139	1139	x	x
1140	0	1	0	1	1	0	1	1	1	1	0	1	1	1	1	1	1	1	1	1	1	1	1	1	1	1	1	1	1	1	1	0		x	x	x	1140	1140	x	1140	1140	1140	1140	x	1140	1140	x	x	x
1141	0	1	0	1	1	0	1	1	1	1	1	1	1	1	1	1	1	1	1	1	1	1	1	1	1	1	1	1	1	1	1	0		x	x	x	1141	1141	x	1141	1141	1141	1141	x	1141	1141	x	x	x
1142	0	0	0	1	1	1	1	1	1	1	0	1	1	1	1	1	1	1	1	1	1	1	1	1	1	1	0	1	1	1	1	0		x	x	x	1142	1142	x	1142	1142	1142	1142	x	1142	1142	x	x	x
1143	0	1	0	1	1	1	1	1	1	1	1	1	1	1	0	0	1	1	1	1	1	1	1	1	1	1	1	1	1	1	1	0		x	1143	x	1143	1143	x	1143	1143	1143	1143	x	1143	1143	x	x	x
1144	1	1	0	1	1	0	1	1	1	1	1	1	1	0	1	0	1	1	1	1	1	1	1	1	1	1	0	1	1	1	1	0		x	1144	x	1144	1144	x	1144	1144	1144	1144	x	1144	1144	x	1144	x
1145	1	1	0	1	1	0	1	1	1	1	1	1	1	0	1	0	1	1	1	1	1	1	1	1	1	1	0	1	1	1	1	1		x	1145	x	1145	1145	x	1145	1145	1145	1145	x	1145	1145	x	1145	x
1146	1	1	0	1	1	0	1	1	1	1	0	1	1	1	1	1	1	1	1	1	1	1	1	1	1	1	0	1	1	1	1	0		x	1146	x	1146	x	x	1146	1146	1146	1146	x	1146	1146	1146	1146	1146
1147	1	1	0	1	1	1	1	1	1	1	1	1	1	1	1	1	1	1	1	1	1	1	1	1	1	1	0	1	1	1	1	0		x	1147	x	1147	x	1147	1147	1147	x	1147	1147	1147	1147	1147	1147	1147
1148	0	1	0	1	1	1	1	1	1	1	1	1	1	1	1	1	1	1	1	1	1	1	1	1	0	1	0	1	1	1	1	1		x	1148	x	1148	x	1148	1148	1148	x	1148	x	1148	1148	1148	1148	1148
1149	0	1	1	1	1	1	1	1	1	1	1	1	1	1	1	1	1	1	1	1	1	1	1	1	0	1	1	1	1	1	1	1		x	1149	1149	1149	x	1149	1149	1149	x	1149	x	1149	1149	1149	1149	1149
1150	1	1	1	1	0	1	1	1	1	1	1	1	1	1	1	1	1	1	1	1	1	1	1	1	1	1	0	1	1	1	1	1		x	1150	1150	1150	x	1150	1150	1150	x	1150	x	1150	1150	1150	1150	1150
1151	1	1	1	1	1	1	1	1	0	1	1	1	1	1	1	1	1	1	0	1	1	1	1	1	1	1	0	1	1	1	1	1		x	1151	1151	1151	x	1151	1151	1151	x	1151	x	1151	1151	x	1151	1151
1152	1	1	1	1	1	1	1	1	1	1	0	1	1	1	1	1	1	1	0	1	1	1	1	1	1	1	1	1	1	1	1	1		x	1152	1152	1152	x	1152	1152	1152	x	1152	x	1152	1152	x	1152	1152
1153	1	1	1	1	1	1	1	1	1	1	0	1	1	1	1	1	1	1	1	1	1	1	1	1	1	1	1	1	1	1	1	1		x	1153	1153	1153	x	1153	1153	1153	x	1153	x	1153	1153	x	1153	1153
1154	0	1	1	1	0	1	1	1	1	1	0	1	1	1	1	1	1	1	0	1	1	1	1	1	1	1	1	1	1	1	1	1		x	1154	1154	1154	x	1154	1154	1154	x	1154	x	1154	1154	x	1154	1154
1155	0	1	1	1	0	1	1	1	0	1	0	1	1	0	1	1	1	1	0	1	1	1	1	1	1	1	1	1	1	1	1	1		x	1155	1155	1155	x	1155	1155	1155	x	1155	x	1155	1155	x	1155	1155
1156	1	1	1	1	0	1	1	1	0	1	0	1	1	0	1	1	1	1	1	1	1	1	1	1	1	1	1	1	1	1	1	1		1156	1156	1156	1156	x	1156	1156	1156	x	1156	x	1156	1156	x	1156	1156
1157	1	1	1	1	1	1	1	1	1	1	0	1	1	0	1	1	1	1	1	1	1	1	1	1	1	1	1	1	1	1	1	1		1157	1157	1157	1157	1157	1157	1157	1157	1157	1157	x	1157	1157	x	1157	1157
1158	1	1	1	1	1	1	1	1	1	1	0	1	1	0	1	1	1	1	1	1	1	1	1	0	1	1	1	1	1	1	1	1		1158	1158	1158	1158	1158	1158	1158	1158	1158	1158	x	1158	1158	x	1158	1158
1159	1	1	1	1	1	1	1	1	1	1	1	1	1	1	1	1	1	1	1	1	1	1	1	0	1	1	1	1	1	1	1	1		1159	1159	1159	1159	1159	1159	1159	1159	1159	1159	x	1159	1159	1159	1159	1159
1160	1	1	1	1	1	1	1	1	1	1	0	1	1	1	1	1	1	1	1	1	1	1	1	0	1	1	1	1	1	1	1	1		1160	1160	1160	1160	1160	1160	1160	1160	1160	1160	x	1160	1160	1160	1160	1160
1161	1	1	1	1	1	1	1	1	1	1	1	1	1	1	1	1	1	1	0	1	1	1	1	0	1	1	1	1	1	1	1	1		1161	1161	1161	1161	1161	1161	1161	1161	1161	1161	x	1161	1161	1161	1161	1161
1162	1	1	1	1	1	1	1	1	1	1	1	1	1	1	1	1	1	1	1	1	1	1	1	1	1	1	1	1	1	1	1	1		1162	1162	x	1162	1162	1162	1162	1162	1162	1162	x	1162	1162	1162	1162	1162
1163	1	1	1	1	1	1	1	1	1	1	1	1	1	1	1	1	1	1	1	1	1	1	1	0	1	1	1	1	1	1	1	1		1163	1163	x	1163	1163	1163	1163	1163	1163	1163	x	1163	1163	1163	1163	1163
1164	1	1	1	1	1	1	1	1	1	1	1	1	1	1	1	1	1	1	1	1	1	1	1	0	1	1	1	1	1	1	1	1		1164	1164	x	1164	1164	1164	1164	1164	1164	1164	x	1164	1164	1164	1164	1164
1165	1	1	1	1	1	1	1	1	1	1	0	1	1	1	1	1	1	1	1	1	1	1	1	0	1	1	1	1	1	1	1	1		1165	1165	x	1165	1165	1165	1165	1165	1165	1165	x	1165	1165	1165	1165	1165
1166	1	1	0	1	1	1	1	1	1	1	1	1	1	1	1	1	1	1	0	1	1	1	1	0	0	1	1	1	1	0	1	1		1166	1166	x	1166	1166	1166	1166	1166	1166	1166	x	1166	1166	1166	1166	1166
1167	1	1	0	1	1	1	1	1	1	1	1	1	1	1	1	1	1	1	1	1	1	1	1	0	0	1	0	1	1	1	1	1		1167	1167	x	1167	1167	1167	x	1167	1167	1167	x	1167	1167	1167	1167	1167
1168	1	1	0	1	1	1	1	1	1	1	1	1	1	1	1	1	1	1	1	1	1	1	0	0	0	1	1	1	1	1	1	1		1168	1168	x	1168	1168	1168	x	1168	1168	1168	x	1168	1168	1168	1168	1168
1169	1	1	0	1	1	1	1	1	1	1	0	1	1	1	1	1	1	1	0	1	1	1	1	0	0	1	0	1	1	0	1	1		1169	1169	x	1169	1169	1169	x	1169	1169	1169	x	1169	1169	1169	1169	1169
1170	1	1	0	1	1	1	1	1	1	1	1	1	1	1	1	1	1	1	1	1	1	1	1	1	1	1	1	1	1	0	1	1		1170	1170	x	1170	1170	1170	x	1170	1170	1170	x	1170	1170	1170	1170	x
1171	1	1	0	1	1	1	0	1	1	1	0	1	1	1	1	1	1	1	1	1	1	1	1	1	1	1	1	1	1	1	1	1		1171	1171	x	1171	1171	1171	x	1171	1171	1171	x	1171	1171	1171	1171	x
1172	1	1	0	1	1	1	0	1	1	1	1	1	1	1	1	1	1	1	1	1	1	1	1	1	0	1	0	1	1	0	1	1		1172	1172	x	1172	1172	1172	x	1172	1172	1172	x	1172	1172	1172	1172	x
1173	1	1	0	1	1	1	1	1	1	1	0	1	1	1	1	1	1	1	1	1	1	1	1	1	1	1	1	1	1	0	1	1		1173	1173	x	1173	1173	1173	x	1173	1173	1173	x	1173	1173	1173	1173	x
1174	1	1	0	1	1	1	0	1	1	1	1	1	1	1	1	0	1	1	1	1	1	1	1	1	1	1	1	0	1	1	1	1		1174	1174	x	1174	1174	1174	x	1174	1174	1174	1174	1174	1174	1174	1174	x
1175	1	1	0	1	1	1	0	1	1	1	1	1	1	1	1	0	1	1	1	1	1	1	1	1	0	1	1	1	1	1	1	1		1175	1175	x	1175	x	1175	x	1175	1175	1175	1175	1175	1175	1175	1175	x
1176	1	1	1	1	1	1	0	1	1	1	1	1	1	1	1	1	1	1	1	1	1	1	1	1	1	1	0	1	1	1	1	1		1176	1176	x	1176	x	1176	x	1176	1176	1176	1176	1176	1176	1176	1176	x
1177	1	1	0	1	1	1	0	1	1	1	1	1	1	1	1	1	1	1	1	1	1	1	1	1	1	1	0	1	1	1	1	1		1177	1177	x	1177	x	1177	x	1177	1177	1177	1177	1177	1177	1177	1177	x
1178	1	1	0	1	1	1	0	1	1	1	1	1	1	1	1	0	1	1	1	1	1	1	1	1	1	1	0	1	1	1	1	1		1178	1178	x	1178	x	1178	x	1178	1178	1178	1178	1178	1178	1178	1178	x
1179	1	1	0	1	0	1	1	1	1	1	1	1	1	1	1	1	1	1	1	1	1	1	1	1	1	1	1	1	1	1	1	1		1179	1179	x	1179	x	1179	x	1179	1179	1179	1179	1179	1179	1179	1179	x
1180	1	1	0	1	1	1	1	1	1	1	1	1	1	1	1	0	1	1	1	1	1	1	1	1	1	0	0	1	1	1	1	1		1180	1180	x	1180	1180	1180	x	1180	1180	1180	1180	1180	1180	x	1180	x
1181	1	1	0	1	1	1	1	1	1	1	1	1	1	1	1	0	1	1	1	1	1	1	1	1	1	0	0	1	1	1	1	1		1181	1181	x	1181	1181	1181	x	1181	1181	1181	1181	1181	1181	x	1181	x
1182	1	1	0	1	1	1	1	1	1	1	1	1	1	1	1	0	1	1	1	1	1	1	1	1	1	0	0	1	1	1	1	1		1182	1182	x	1182	1182	1182	x	1182	1182	1182	1182	1182	1182	x	1182	x
1183	1	1	0	1	1	1	0	1	1	1	1	1	1	1	1	0	1	1	0	1	1	1	1	1	0	0	1	1	1	1	1	1		1183	1183	x	1183	1183	1183	x	1183	1183	1183	1183	1183	1183	x	1183	x
1184	1	1	0	1	1	1	1	1	1	1	1	1	1	0	1	0	1	1	1	1	1	1	1	1	0	1	1	1	1	1	1	1		1184	1184	x	1184	1184	1184	x	1184	1184	1184	1184	1184	1184	x	1184	x
1185	1	1	0	1	1	1	0	1	1	1	1	1	1	1	1	0	1	1	1	1	1	1	1	1	1	1	0	1	1	1	1	1		1185	1185	x	1185	1185	1185	x	1185	1185	1185	1185	1185	1185	1185	1185	x
1186	1	1	0	1	1	1	1	1	1	1	1	1	1	1	1	0	1	1	1	1	1	1	1	1	0	1	1	1	1	1	1	1		1186	1186	x	1186	1186	1186	1186	1186	1186	1186	1186	1186	1186	1186	1186	x
1187	1	1	0	1	1	1	1	1	1	1	1	1	1	1	1	0	1	1	0	1	1	1	1	1	0	1	1	1	1	1	1	1		1187	1187	x	1187	1187	1187	1187	1187	1187	1187	x	1187	1187	1187	1187	x
1188	1	1	0	1	1	1	1	1	1	1	1	1	1	1	1	1	1	1	0	1	1	1	1	1	1	1	0	1	1	1	1	1		1188	1188	x	1188	1188	1188	1188	1188	1188	1188	x	1188	1188	1188	1188	x
1189	1	1	0	1	1	1	1	1	1	1	1	1	1	1	1	0	1	1	1	1	1	1	1	1	1	0	1	1	1	1	1	1		1189	1189	x	1189	1189	1189	1189	1189	1189	1189	x	1189	1189	1189	1189	x
1190	1	1	1	1	1	1	1	1	1	1	1	1	1	1	1	0	1	1	1	1	1	1	1	1	1	1	1	1	1	1	1	1		1190	1190	1190	1190	1190	1190	1190	1190	1190	1190	x	1190	1190	1190	1190	x
1191	1	1	1	1	1	1	1	1	1	1	0	1	1	1	1	0	1	1	1	1	1	0	1	1	1	1	0	1	1	1	1	1		1191	1191	1191	1191	1191	1191	1191	1191	1191	1191	x	1191	1191	1191	1191	x
1192	1	1	1	1	1	1	1	1	1	1	1	1	1	1	1	1	1	1	1	1	1	0	1	0	1	1	0	1	1	1	1	1		1192	1192	1192	1192	1192	1192	1192	1192	x	1192	x	1192	1192	1192	1192	x
1193	1	1	1	1	1	1	1	1	1	1	0	1	1	1	1	0	1	1	1	1	1	1	1	1	1	1	1	1	1	1	1	1		1193	1193	1193	1193	1193	1193	1193	1193	x	1193	x	1193	1193	1193	1193	x
1194	1	1	1	1	1	1	1	1	1	1	0	1	1	1	1	0	1	1	1	1	1	1	1	1	1	1	1	1	1	1	1	1		1194	1194	1194	1194	1194	1194	1194	1194	x	1194	x	1194	1194	1194	1194	x
1195	1	1	1	1	1	1	1	1	1	1	1	1	1	1	1	0	1	1	0	1	1	0	1	0	1	0	0	1	1	1	1	1		1195	1195	1195	1195	1195	1195	1195	1195	x	1195	1195	1195	1195	1195	1195	x
1196	1	1	1	1	1	1	1	1	0	1	1	1	1	1	1	0	1	1	1	1	1	0	1	1	0	0	1	1	1	1	1	1		1196	1196	1196	1196	1196	1196	1196	1196	x	1196	1196	1196	1196	1196	1196	x
1197	1	1	1	1	1	1	1	1	0	1	1	1	1	1	1	0	1	1	1	0	1	1	1	0	0	1	0	1	1	1	1	1		1197	1197	1197	1197	1197	1197	1197	1197	x	1197	1197	1197	1197	1197	x	x
1198	1	1	1	1	1	1	1	1	1	1	1	1	1	1	1	0	1	1	0	1	1	1	1	0	0	0	1	1	1	1	1	1		1198	1198	1198	1198	1198	1198	1198	1198	1198	1198	1198	1198	1198	1198	x	x
1199	1	1	1	1	1	1	1	1	1	1	1	1	1	1	1	0	1	1	1	0	1	1	1	0	0	0	1	1	1	1	1	1		1199	1199	1199	1199	1199	1199	1199	1199	x	1199	1199	1199	1199	1199	x	x
1200	1	1	1	1	1	1	1	1	1	1	1	1	1	1	1	0	1	1	0	0	1	1	1	1	1	0	1	0	1	1	1	1		1200	1200	1200	1200	1200	1200	1200	1200	x	1200	1200	1200	1200	1200	x	x
1201	1	1	1	1	1	1	1	1	1	1	1	1	1	1	0	0	1	1	0	0	1	1	1	0	1	0	1	1	1	1	0	1		1201	1201	1201	1201	1201	1201	1201	1201	x	1201	1201	1201	1201	1201	x	x
1202	1	1	1	1	1	1	1	1	1	1	1	1	1	1	1	0	1	1	0	0	1	1	1	0	1	0	1	0	1	1	0	1		1202	1202	1202	1202	1202	1202	1202	1202	x	1202	1202	1202	1202	1202	x	x
1203	1	1	1	1	1	1	1	1	0	1	1	1	1	1	1	0	1	1	0	0	1	1	1	1	1	0	1	0	1	1	1	1		1203	1203	1203	1203	1203	1203	1203	1203	x	1203	1203	1203	1203	1203	x	x
1204	1	1	1	1	1	1	1	1	1	1	1	1	1	1	0	0	1	1	1	0	1	1	1	0	0	0	1	1	1	1	0	1		1204	1204	1204	1204	1204	1204	1204	1204	x	1204	1204	1204	1204	1204	x	x
1205	1	1	1	1	1	1	1	1	1	1	1	1	1	1	0	1	1	1	1	0	1	1	1	0	0	1	1	0	1	1	0	1		1205	1205	1205	1205	1205	1205	1205	1205	x	1205	1205	1205	1205	1205	x	1205
1206	1	1	1	1	1	1	1	1	1	1	1	1	1	1	0	1	1	1	1	1	1	1	1	1	1	1	0	0	1	1	1	1		1206	1206	1206	1206	1206	1206	1206	1206	x	1206	1206	1206	1206	1206	x	1206
1207	1	1	1	1	1	1	1	1	0	1	1	1	1	1	0	1	1	1	1	0	1	1	1	1	1	1	0	0	1	1	1	1		1207	1207	1207	1207	1207	1207	1207	1207	x	1207	1207	1207	1207	1207	x	1207
1208	1	1	1	1	1	1	1	1	1	1	1	1	1	1	0	1	1	1	1	0	1	1	1	1	1	1	1	0	1	1	1	1		1208	1208	1208	1208	1208	1208	1208	1208	x	1208	1208	1208	1208	1208	x	1208
1209	1	1	1	1	1	1	1	1	1	1	1	1	1	1	0	1	1	1	1	0	1	1	1	1	1	1	1	0	1	1	1	1		1209	1209	1209	1209	1209	1209	1209	1209	x	1209	1209	1209	1209	1209	x	1209
1210	1	1	1	1	1	1	1	1	1	1	1	1	1	1	0	1	1	1	1	0	1	1	1	1	1	0	1	1	1	1	1	1		1210	1210	1210	1210	1210	1210	1210	1210	x	1210	1210	1210	1210	1210	x	1210
1211	1	1	1	1	1	1	1	1	0	1	1	1	1	1	1	1	1	1	1	1	1	1	1	1	1	1	0	1	1	1	1	1		x	1211	1211	1211	1211	1211	x	1211	x	1211	1211	1211	1211	1211	x	1211
1212	1	1	1	1	1	1	1	1	0	1	1	1	1	1	0	1	1	1	1	1	1	1	1	1	0	1	1	1	1	1	1	1		x	1212	1212	1212	1212	1212	x	1212	x	1212	1212	1212	1212	1212	x	1212
1213	1	1	1	1	1	1	1	1	1	1	1	1	1	1	0	1	1	1	1	0	1	1	1	1	1	1	1	1	1	1	1	1		x	1213	1213	1213	1213	1213	x	1213	x	1213	1213	1213	1213	1213	x	1213
1214	1	1	1	1	1	1	1	1	1	1	1	1	1	1	0	1	1	1	1	1	1	1	1	1	1	1	1	1	1	1	1	1		x	1214	1214	1214	x	1214	x	1214	x	1214	1214	1214	1214	1214	x	1214
1215	0	1	1	1	1	1	0	1	1	1	1	1	1	1	0	1	1	1	1	0	1	1	1	1	1	1	1	1	1	1	1	1		x	1215	1215	1215	x	1215	x	1215	x	1215	1215	1215	1215	1215	x	1215
1216	1	1	1	1	1	1	1	1	0	1	1	1	1	1	0	1	1	1	1	0	1	1	1	1	1	1	0	1	1	1	1	1		x	1216	1216	1216	x	1216	1216	1216	x	1216	1216	1216	1216	1216	x	1216
1217	0	1	1	1	1	1	1	1	0	1	1	1	1	1	0	1	1	1	1	0	1	1	0	1	1	1	0	1	1	1	1	1		x	1217	1217	1217	x	1217	1217	1217	x	1217	1217	1217	1217	1217	x	1217
1218	1	1	1	1	0	1	1	1	0	1	1	1	1	1	0	1	1	1	1	0	1	1	1	1	1	1	1	1	1	0	1	1		x	1218	1218	1218	x	1218	1218	1218	x	1218	1218	1218	1218	1218	x	1218
1219	0	1	1	1	1	1	1	1	1	1	1	1	1	1	0	1	1	1	1	1	1	1	0	1	1	1	1	1	1	1	0	1		x	1219	1219	1219	1219	1219	1219	1219	x	1219	1219	1219	1219	1219	x	1219
1220	0	1	1	1	1	1	1	1	1	1	1	1	1	1	1	1	1	1	1	1	1	1	1	1	1	1	0	1	1	1	0	1		x	1220	1220	1220	1220	1220	1220	1220	x	1220	1220	1220	1220	1220	1220	1220
1221	0	1	1	1	1	1	1	1	1	1	1	1	1	1	1	1	1	1	1	1	1	1	1	1	1	0	1	1	1	1	1	1		x	1221	1221	1221	1221	1221	1221	1221	x	1221	1221	1221	1221	1221	1221	1221
1222	0	1	1	1	1	1	1	1	0	1	1	1	1	1	1	1	1	1	1	1	1	1	0	1	1	1	1	1	1	0	1	1		x	1222	1222	1222	1222	1222	x	1222	x	1222	1222	1222	1222	1222	1222	1222
1223	1	1	1	1	1	1	1	1	0	1	1	1	1	1	1	1	1	1	1	1	1	1	0	1	1	0	1	1	1	0	1	1		x	1223	x	1223	1223	1223	x	1223	x	1223	1223	1223	1223	1223	1223	1223
1224	0	1	1	1	1	1	1	1	1	1	1	1	1	1	1	1	1	1	1	1	1	1	0	1	1	1	1	1	1	1	1	1		x	1224	x	1224	1224	1224	x	1224	1224	1224	1224	1224	1224	1224	x	1224
1225	1	1	1	1	1	1	1	1	1	1	1	1	1	1	1	1	1	1	1	1	1	1	0	1	1	1	1	1	1	1	1	1		1225	1225	x	1225	1225	1225	x	1225	x	1225	1225	1225	1225	1225	x	1225
1226	1	1	1	1	1	1	0	1	1	1	1	1	1	1	1	1	1	1	1	1	1	1	0	1	1	0	1	1	1	1	1	1		1226	1226	x	1226	1226	1226	x	1226	x	1226	1226	1226	1226	1226	x	1226
1227	1	1	0	1	1	1	1	1	1	1	1	1	1	1	1	1	1	1	1	1	1	1	1	1	1	1	1	1	1	1	1	1		x	1227	x	1227	1227	1227	1227	1227	x	1227	1227	1227	1227	1227	x	1227
1228	1	1	0	1	1	1	1	1	1	1	1	1	1	1	0	1	1	1	1	1	1	1	1	1	1	1	1	1	1	1	1	1		x	1228	x	1228	1228	1228	1228	1228	x	1228	1228	1228	1228	1228	x	1228
1229	1	1	0	1	1	1	1	1	0	1	1	1	1	1	0	1	1	1	1	1	1	1	0	1	1	1	1	1	1	1	1	1		x	1229	x	1229	1229	1229	1229	1229	x	1229	1229	1229	1229	1229	x	1229
1230	1	1	0	1	1	1	1	1	1	1	1	1	1	1	1	1	1	1	1	1	1	0	1	0	1	1	1	1	1	1	1	1		x	1230	x	1230	1230	1230	1230	1230	x	1230	1230	1230	1230	1230	x	1230
1231	0	1	0	1	1	1	1	1	0	1	1	1	1	1	0	1	1	1	1	1	1	0	1	0	1	1	1	1	1	1	1	1		x	1231	x	1231	1231	1231	1231	1231	x	1231	1231	1231	1231	1231	x	1231
1232	0	1	0	1	1	1	1	1	1	1	1	1	1	1	0	1	1	1	1	0	1	0	0	0	1	1	1	0	1	1	1	1		x	1232	x	1232	1232	1232	1232	1232	x	1232	1232	1232	1232	1232	x	1232
1233	0	1	1	1	1	1	1	1	1	1	1	1	1	1	0	1	1	1	1	0	1	0	1	0	1	1	1	0	1	1	1	1		x	1233	x	1233	1233	1233	1233	1233	x	1233	1233	1233	1233	1233	x	1233
1234	1	1	0	1	1	1	1	1	0	1	1	1	1	1	0	1	0	1	1	0	1	1	0	0	1	1	1	0	1	1	1	1		x	1234	x	1234	1234	1234	1234	1234	x	1234	1234	1234	1234	1234	x	1234
1235	0	1	0	1	1	1	1	1	0	1	1	1	1	1	0	1	1	1	1	0	1	1	1	0	1	1	0	0	1	1	1	1		x	1235	x	1235	1235	1235	1235	1235	x	1235	1235	1235	1235	1235	x	1235
1236	0	1	0	1	1	1	1	1	1	1	1	1	1	1	0	1	1	1	1	0	1	1	0	0	1	1	1	0	1	1	1	1		x	1236	x	x	1236	1236	1236	1236	x	1236	1236	1236	1236	1236	x	1236
1237	0	1	0	1	1	1	1	1	0	1	1	1	1	1	1	1	1	1	1	1	1	1	0	1	1	1	0	0	1	1	1	1		x	x	x	x	1237	1237	1237	1237	x	1237	1237	1237	1237	1237	x	1237
1238	0	1	1	1	1	1	1	1	1	1	1	1	1	1	0	1	1	1	1	1	1	1	0	1	1	1	0	0	1	1	1	1		x	x	x	x	1238	1238	1238	1238	1238	1238	1238	1238	1238	1238	x	1238
1239	0	1	0	1	1	1	1	1	1	1	1	1	1	1	1	1	1	1	1	1	1	1	0	1	1	1	1	0	1	1	0	1		x	x	x	x	1239	1239	1239	1239	x	1239	1239	1239	1239	1239	x	1239
1240	0	1	0	0	1	1	1	1	1	1	1	1	1	1	0	1	1	1	1	0	1	1	0	0	1	0	1	0	1	1	1	1		x	x	x	x	1240	1240	x	1240	x	1240	1240	1240	1240	1240	x	1240
1241	0	0	1	0	1	1	1	1	1	1	1	1	1	1	0	1	1	1	1	0	1	1	1	1	1	0	1	0	1	1	0	1		x	x	x	x	1241	1241	x	1241	x	1241	1241	1241	1241	1241	x	1241
1242	0	0	0	0	1	1	1	1	1	1	1	1	1	1	0	1	1	1	1	1	1	1	0	0	1	1	1	0	1	1	0	1		x	x	x	x	1242	1242	x	1242	x	1242	1242	1242	1242	1242	x	1242
1243	1	1	0	1	1	1	1	1	0	1	1	1	1	1	0	1	1	1	1	1	1	1	0	1	1	1	1	0	1	1	1	1		1243	x	x	x	1243	1243	x	1243	x	1243	1243	1243	1243	x	x	1243
1244	1	1	0	1	1	1	0	1	1	1	1	1	1	1	0	1	1	1	1	1	1	1	1	1	1	0	1	0	1	1	0	1		1244	x	x	x	1244	1244	x	1244	x	1244	1244	1244	1244	x	x	1244
1245	1	0	1	0	1	1	1	1	0	1	1	1	1	1	0	1	1	1	1	1	1	0	1	1	1	0	1	0	1	1	1	1		1245	x	x	x	1245	1245	x	1245	x	1245	1245	1245	1245	x	x	1245
1246	1	0	1	1	1	1	1	1	0	1	1	1	1	1	1	1	1	1	0	1	1	1	1	1	1	0	1	0	1	1	1	1		1246	x	x	x	1246	1246	x	1246	x	1246	1246	1246	1246	x	x	1246
1247	1	0	1	1	1	1	1	1	0	1	1	1	1	0	1	1	1	1	0	1	1	1	1	1	1	0	1	0	1	1	1	1		1247	x	x	x	1247	1247	x	1247	x	1247	1247	1247	1247	x	x	1247
1248	1	0	0	1	1	1	0	1	0	1	1	1	1	1	0	1	1	1	0	1	1	1	1	1	1	0	1	0	1	1	1	0		1248	x	x	x	1248	1248	x	1248	x	1248	1248	1248	1248	1248	x	1248
1249	1	0	0	0	1	1	1	1	0	1	1	1	1	1	1	1	1	1	0	1	1	1	1	1	1	0	1	0	1	1	1	0		1249	x	x	x	1249	1249	1249	1249	x	1249	1249	1249	1249	1249	x	1249
1250	1	0	0	0	1	1	1	1	1	1	1	1	1	1	0	1	1	1	0	1	1	1	1	1	1	1	1	0	1	1	1	1		1250	x	x	x	1250	1250	1250	1250	1250	1250	1250	1250	1250	1250	x	1250
1251	1	0	1	1	1	1	1	1	1	1	1	1	1	1	0	1	1	1	0	1	1	1	1	0	1	1	1	0	1	1	1	1		1251	x	1251	x	1251	1251	1251	1251	1251	1251	1251	1251	1251	1251	x	1251
1252	1	0	1	0	1	1	1	1	1	1	1	1	1	1	1	1	1	1	1	1	1	1	1	1	1	1	1	0	1	1	1	1		1252	x	1252	x	1252	1252	1252	1252	1252	1252	1252	1252	1252	1252	x	1252
1253	1	0	1	0	1	1	1	1	1	1	1	1	1	1	0	1	1	0	1	1	1	1	1	1	1	1	1	1	1	1	1	1		1253	x	1253	x	1253	1253	1253	1253	1253	1253	1253	1253	1253	1253	x	1253
1254	1	1	1	0	1	1	1	1	1	1	1	1	1	1	0	1	1	1	1	1	1	1	1	1	0	1	1	1	1	1	1	0		1254	x	1254	x	1254	1254	1254	1254	1254	1254	1254	1254	1254	1254	x	1254
1255	1	0	1	1	1	1	1	1	1	1	1	1	1	1	0	1	1	1	1	1	1	1	1	1	0	1	1	1	1	1	1	0		1255	x	1255	1255	1255	1255	1255	1255	1255	1255	1255	1255	1255	1255	x	1255
1256	1	0	1	1	1	1	1	1	1	1	1	1	1	1	0	1	1	1	1	1	1	1	1	1	0	1	1	1	1	1	1	1		1256	x	1256	x	1256	1256	1256	1256	1256	1256	1256	1256	1256	1256	x	1256
1257	1	0	1	1	1	1	1	1	1	1	1	1	1	1	0	1	1	1	1	1	1	1	1	1	0	0	1	1	1	1	1	1		1257	x	1257	x	1257	1257	1257	1257	1257	1257	1257	1257	1257	1257	x	1257
1258	1	0	1	1	1	1	1	1	1	1	1	1	1	1	1	1	1	1	1	1	1	1	1	1	1	0	1	0	1	1	1	1		1258	x	1258	x	1258	1258	1258	1258	1258	1258	x	1258	1258	1258	1258	1258
1259	1	0	1	1	1	1	1	1	1	1	1	1	1	1	1	1	1	1	1	1	1	1	1	1	1	0	1	0	1	1	1	1		1259	x	1259	x	1259	1259	1259	1259	1259	1259	x	1259	1259	x	1259	1259
1260	1	0	1	0	1	1	1	1	1	1	1	1	1	1	1	1	1	1	1	1	1	1	1	1	0	0	1	1	1	1	1	1		1260	x	1260	x	1260	1260	1260	1260	1260	1260	x	1260	1260	x	x	1260
1261	1	0	1	1	1	1	1	1	1	1	1	1	1	1	1	1	1	1	0	1	1	1	1	1	1	1	1	1	1	1	1	1		1261	x	1261	1261	1261	1261	1261	1261	1261	1261	x	1261	1261	x	x	1261
1262	1	0	1	1	1	1	1	1	1	1	0	1	1	1	1	1	0	1	0	1	1	1	1	1	1	1	1	1	1	1	1	1		1262	x	1262	1262	1262	1262	x	1262	1262	1262	x	1262	1262	x	x	1262
1263	1	0	1	1	1	1	1	1	1	1	1	1	1	0	1	1	1	1	0	1	1	1	1	1	1	1	1	1	1	1	1	1		1263	x	1263	1263	1263	1263	x	1263	1263	1263	x	1263	1263	x	x	1263
1264	1	0	1	1	1	1	1	1	1	1	1	1	1	0	0	1	1	1	0	1	1	1	1	1	1	1	0	1	1	1	1	1		1264	x	1264	1264	1264	1264	x	1264	1264	1264	x	1264	1264	x	x	1264
1265	1	0	1	1	1	1	1	1	1	1	1	1	1	0	0	1	1	1	0	1	1	1	1	1	1	1	1	1	1	1	1	1		1265	x	1265	1265	1265	1265	x	1265	1265	1265	x	1265	1265	x	x	1265
1266	1	0	1	1	1	1	0	1	1	1	1	1	1	0	0	1	1	1	0	1	1	1	1	1	0	1	1	1	1	1	1	1		1266	x	1266	1266	1266	1266	x	1266	1266	1266	x	1266	1266	x	x	1266
1267	1	1	1	1	1	1	1	1	1	1	0	1	1	1	0	1	0	1	1	1	1	1	1	1	1	1	1	1	1	1	1	1		1267	x	1267	1267	1267	1267	1267	1267	1267	1267	x	1267	1267	1267	x	1267
1268	1	0	1	1	1	1	1	1	1	1	1	1	1	1	0	1	0	1	1	1	1	1	1	1	1	1	1	1	1	1	1	1		1268	x	1268	1268	1268	1268	x	1268	1268	1268	1268	1268	1268	1268	x	1268
1269	1	0	1	1	1	1	1	1	1	1	1	1	1	1	0	1	0	1	1	1	1	1	1	1	1	1	0	1	1	1	1	1		1269	x	1269	1269	1269	1269	x	1269	1269	1269	x	1269	1269	1269	x	1269
1270	1	0	1	1	1	1	1	1	1	1	1	1	1	1	0	1	0	1	0	1	1	1	1	1	1	1	0	1	1	1	1	1		1270	x	1270	1270	1270	1270	x	1270	1270	1270	x	1270	1270	1270	x	1270
1271	1	1	1	1	1	1	1	1	1	1	1	1	1	1	1	1	0	1	1	1	1	1	1	1	1	1	1	1	1	1	1	1		1271	1271	1271	1271	1271	1271	x	1271	1271	1271	x	1271	1271	1271	x	1271
1272	1	1	1	1	1	1	0	1	1	1	1	1	1	1	0	1	0	1	1	1	1	1	1	1	1	1	1	1	1	1	1	0		1272	1272	1272	1272	1272	1272	x	1272	1272	1272	x	1272	1272	1272	x	1272
1273	1	1	1	1	1	1	1	1	1	1	0	1	1	1	0	1	0	1	1	1	1	1	1	0	1	1	1	1	1	1	1	1		1273	1273	1273	1273	1273	1273	1273	1273	1273	1273	x	1273	1273	1273	x	1273
1274	1	1	1	1	1	1	1	1	1	1	0	1	1	1	0	1	0	1	0	0	1	1	1	1	1	1	1	1	1	1	1	1		1274	1274	1274	1274	1274	1274	1274	1274	1274	1274	x	1274	1274	x	x	1274
1275	1	1	1	1	1	1	1	1	1	1	1	1	1	1	0	1	0	1	1	0	1	1	1	0	1	1	1	1	1	1	1	1		1275	1275	1275	1275	1275	1275	x	1275	1275	1275	x	1275	1275	x	x	1275
1276	1	1	1	1	1	1	1	1	1	1	1	1	1	1	0	1	1	1	1	0	1	1	1	0	1	1	1	1	1	1	1	1		1276	1276	1276	1276	1276	1276	x	1276	1276	1276	x	1276	1276	x	x	1276
1277	1	1	1	1	1	1	1	1	1	1	0	1	1	1	0	1	1	1	1	0	1	1	1	0	1	1	1	1	1	1	1	1		x	1277	1277	1277	1277	1277	x	1277	1277	1277	x	1277	1277	x	x	1277
1278	1	1	1	1	1	1	1	1	1	1	0	1	1	0	0	1	1	0	1	0	1	1	1	1	1	1	1	1	1	1	1	1		x	1278	1278	1278	1278	1278	x	1278	1278	1278	x	1278	1278	x	x	1278
1279	1	1	1	1	1	1	0	1	1	1	0	1	1	1	0	1	1	1	1	1	1	1	1	1	1	1	1	1	0	1	0	0		x	1279	1279	1279	1279	1279	x	1279	1279	1279	x	1279	1279	1279	x	1279
1280	1	1	1	1	1	1	1	1	1	1	1	1	1	1	0	1	1	1	1	1	1	1	1	1	0	1	1	1	1	1	1	0		x	1280	1280	1280	1280	1280	1280	1280	1280	1280	x	1280	1280	1280	x	1280
1281	0	1	1	1	1	1	1	1	1	1	0	1	1	1	1	1	1	1	1	1	1	1	1	1	1	1	1	1	1	1	1	0		x	1281	1281	1281	1281	1281	1281	1281	1281	1281	x	1281	1281	1281	x	1281
1282	0	1	1	1	1	1	1	1	1	1	1	1	1	1	1	1	1	1	0	1	1	1	1	0	1	1	1	1	0	1	1	0		x	1282	1282	1282	1282	1282	1282	1282	1282	1282	x	1282	1282	1282	x	1282
1283	0	1	1	1	1	1	1	1	1	1	1	1	1	1	1	1	1	1	0	1	1	1	1	0	0	1	1	1	1	1	1	1		x	1283	1283	1283	1283	1283	1283	1283	1283	1283	x	1283	1283	1283	x	1283
1284	0	1	1	1	1	1	1	1	1	1	0	1	1	1	0	1	1	1	1	1	1	1	1	0	0	1	1	1	1	1	1	1		x	1284	1284	1284	1284	1284	1284	1284	1284	1284	x	1284	1284	1284	x	1284
1285	0	1	1	1	1	1	1	1	1	1	1	1	1	1	1	1	1	1	1	1	1	1	1	0	0	1	1	1	1	0	1	0		x	1285	1285	1285	1285	1285	x	1285	1285	1285	1285	1285	1285	1285	x	1285
1286	1	1	1	1	1	1	1	1	1	1	1	1	1	1	0	1	0	1	1	1	1	1	1	1	0	1	1	1	0	0	1	1		1286	1286	1286	1286	1286	1286	x	1286	1286	1286	x	1286	1286	1286	x	1286
1287	1	1	1	1	1	1	1	1	1	1	1	1	1	1	0	1	0	1	1	1	1	1	1	1	0	1	1	1	1	1	1	1		1287	1287	1287	1287	1287	1287	x	1287	1287	1287	x	1287	1287	x	x	1287
1288	1	1	1	1	1	1	1	1	1	1	1	1	1	1	0	1	0	1	1	1	1	1	1	1	1	1	1	1	1	1	1	1		1288	1288	1288	1288	1288	1288	x	1288	1288	1288	x	1288	1288	x	x	1288
1289	1	1	1	1	1	1	0	1	1	1	1	1	1	1	0	1	0	1	1	1	1	1	1	1	0	1	1	1	0	1	1	1		1289	1289	1289	1289	1289	1289	x	1289	1289	1289	x	1289	1289	x	x	1289
1290	1	1	1	1	1	1	1	1	1	1	0	1	1	1	0	1	0	1	1	1	1	1	1	1	0	1	1	1	0	1	1	1		1290	1290	1290	1290	1290	1290	1290	1290	1290	1290	x	1290	1290	x	x	1290
1291	1	1	1	1	1	1	1	1	1	1	0	1	1	0	0	1	0	1	0	1	1	1	1	1	1	1	1	1	0	1	1	0		1291	1291	1291	1291	1291	1291	1291	1291	1291	1291	x	1291	1291	x	x	1291
1292	1	1	1	1	1	1	1	1	1	1	0	1	1	0	1	1	0	1	1	1	1	1	1	1	1	1	1	1	0	1	1	1		1292	1292	1292	1292	1292	1292	1292	1292	1292	1292	x	1292	1292	x	x	1292
1293	1	1	1	1	1	1	1	1	1	1	1	1	1	1	0	1	0	1	1	1	1	1	1	1	1	1	1	1	0	1	1	1		1293	1293	1293	1293	1293	1293	1293	1293	1293	1293	1293	1293	1293	x	x	1293
1294	1	1	1	1	1	1	1	1	1	1	1	1	1	0	0	1	0	1	1	1	1	1	1	1	1	1	1	1	0	1	1	1		1294	1294	1294	1294	1294	1294	1294	1294	1294	1294	1294	1294	1294	x	x	1294
1295	1	1	1	1	1	1	1	1	1	1	1	1	1	1	1	1	0	1	1	1	1	1	1	1	1	1	1	1	0	1	1	1		1295	1295	1295	1295	1295	1295	1295	1295	1295	1295	x	1295	1295	1295	1295	1295
1296	1	1	1	1	1	1	1	1	1	1	1	1	1	1	1	1	0	1	1	1	1	1	1	1	1	1	1	1	0	1	1	1		1296	1296	1296	1296	1296	1296	x	1296	1296	1296	x	1296	1296	1296	1296	1296
1297	1	1	1	1	1	1	1	1	1	1	1	1	1	1	1	1	0	1	1	1	1	0	1	1	1	1	1	1	0	1	1	0		1297	1297	1297	1297	1297	1297	x	1297	1297	1297	x	1297	1297	x	1297	1297
1298	1	1	1	1	1	1	1	1	1	1	1	1	1	1	1	1	0	1	1	1	1	1	1	1	1	0	1	1	0	1	1	1		1298	1298	1298	1298	1298	1298	x	1298	1298	1298	x	1298	1298	x	1298	1298
1299	1	1	1	1	1	1	1	1	1	1	0	1	1	1	1	1	0	1	1	1	1	1	1	1	1	1	1	1	0	1	1	1		1299	1299	1299	1299	1299	1299	x	1299	1299	1299	x	1299	1299	x	1299	1299
1300	1	1	1	1	1	1	0	1	1	1	1	1	1	1	1	1	0	1	1	1	1	1	1	1	1	1	1	1	0	1	1	1		1300	1300	1300	1300	1300	1300	x	1300	1300	1300	1300	1300	1300	x	1300	1300
1301	1	1	1	1	1	1	1	1	1	1	1	1	1	0	1	1	0	1	1	1	1	1	1	1	0	1	1	1	0	1	1	1		1301	1301	1301	1301	1301	1301	x	1301	x	1301	1301	1301	1301	x	1301	1301
1302	1	1	1	1	1	1	0	1	1	1	1	1	1	0	1	1	1	1	1	1	1	1	1	1	1	1	1	1	0	1	1	0		1302	1302	1302	1302	1302	1302	x	1302	x	1302	1302	1302	1302	x	1302	1302
1303	1	1	1	1	1	1	1	1	1	1	1	1	1	0	1	1	0	1	1	1	1	1	1	1	0	1	1	1	0	1	1	1		1303	1303	1303	1303	1303	1303	x	1303	x	1303	1303	1303	1303	x	1303	1303
1304	1	1	1	1	1	1	0	1	1	1	1	1	1	0	1	1	0	1	1	1	1	1	1	1	1	1	1	1	0	1	1	1		x	1304	1304	1304	1304	1304	x	1304	x	1304	1304	1304	1304	x	1304	1304
1305	1	1	1	1	1	1	1	1	0	1	1	1	1	1	1	1	0	1	1	1	1	1	1	1	1	1	1	1	0	1	1	1		x	x	1305	1305	1305	1305	1305	1305	x	1305	1305	1305	1305	1305	1305	1305
1306	1	1	1	1	1	1	1	1	1	1	1	1	1	1	1	1	0	1	1	1	1	1	1	1	0	1	1	1	0	1	1	1		x	x	1306	1306	1306	1306	1306	1306	x	1306	x	1306	1306	1306	1306	1306
1307	1	1	1	1	1	1	1	1	0	1	1	1	1	1	1	1	0	1	1	1	1	0	1	1	0	1	1	1	0	1	1	0		x	x	1307	1307	1307	1307	1307	1307	x	1307	x	1307	1307	1307	1307	1307
1308	0	1	1	1	1	1	1	1	0	1	1	1	1	1	1	1	1	1	1	1	1	0	1	1	0	1	1	1	0	1	1	1		x	x	1308	1308	x	1308	1308	1308	x	1308	x	1308	1308	1308	1308	1308
1309	0	0	1	1	1	1	1	1	0	1	1	1	1	1	1	1	1	1	1	1	1	1	1	1	1	1	0	1	0	1	1	1		x	x	1309	1309	x	1309	1309	1309	x	1309	x	1309	1309	1309	1309	1309
1310	0	0	1	1	1	1	1	1	1	1	0	1	1	1	1	1	1	1	1	1	1	1	1	1	1	1	1	1	0	1	1	1		x	x	x	1310	x	1310	1310	1310	x	1310	x	1310	1310	1310	1310	1310
1311	0	1	1	1	1	1	1	1	1	1	1	1	1	1	1	1	1	1	1	1	1	1	1	1	1	1	1	1	0	1	1	0		x	x	x	1311	x	1311	1311	1311	x	1311	1311	1311	1311	1311	1311	1311
1312	0	0	1	1	0	1	1	1	1	1	1	1	1	1	1	1	1	1	1	1	1	1	1	1	1	1	1	1	0	1	1	1		x	x	x	1312	x	1312	1312	1312	x	1312	1312	1312	1312	1312	1312	1312
1313	0	0	1	1	0	1	1	1	0	1	1	1	1	1	1	1	1	1	1	1	1	1	1	1	1	1	1	1	0	1	1	1		x	x	x	1313	x	1313	1313	1313	x	1313	1313	1313	1313	1313	1313	1313
1314	0	1	0	1	0	1	1	1	0	1	1	1	1	1	1	1	1	1	1	1	1	1	1	1	1	1	1	1	1	1	1	1		x	x	x	1314	x	1314	1314	1314	x	1314	1314	1314	1314	1314	1314	1314
1315	0	0	0	1	1	1	1	1	0	1	1	1	1	1	1	1	1	1	1	1	1	1	1	1	1	1	1	1	1	1	1	0		x	x	x	1315	x	1315	1315	1315	x	1315	1315	1315	1315	x	1315	1315
1316	0	0	1	1	1	1	1	1	0	1	1	1	1	1	1	1	1	1	1	1	1	1	1	1	1	1	1	1	1	1	1	1		x	x	x	1316	x	1316	1316	1316	x	1316	1316	1316	1316	x	1316	1316
1317	1	0	1	1	1	1	1	1	0	1	1	1	1	1	1	1	1	1	1	1	1	1	0	1	1	1	1	1	1	1	1	1		x	x	x	1317	x	x	1317	1317	x	1317	1317	1317	1317	x	1317	1317
1318	0	0	1	1	0	1	1	1	1	1	1	1	1	1	1	1	1	1	1	1	1	1	0	1	1	1	1	1	1	1	1	0		x	x	x	1318	x	x	1318	1318	x	1318	1318	1318	1318	x	1318	1318
1319	0	1	0	1	1	1	1	1	0	1	1	1	1	0	1	1	1	1	1	1	1	1	0	1	1	1	0	1	1	1	1	1		x	1319	x	1319	1319	x	1319	1319	x	1319	1319	1319	1319	x	1319	1319
1320	0	1	1	1	1	1	1	1	1	1	1	1	1	0	1	1	1	1	1	1	0	1	0	1	1	1	1	1	1	1	1	1		x	1320	x	1320	1320	x	1320	1320	x	1320	1320	1320	1320	x	1320	1320
1321	0	1	1	1	1	0	1	1	1	1	1	1	1	0	1	1	1	1	1	1	0	1	0	1	1	1	1	1	1	1	1	0		x	1321	x	1321	1321	x	1321	1321	x	1321	1321	1321	1321	x	1321	1321
1322	0	1	1	1	1	0	1	1	0	1	1	1	1	0	1	1	1	1	1	1	0	1	0	1	1	1	1	1	1	1	1	1		x	1322	x	1322	1322	x	1322	1322	x	1322	1322	1322	1322	x	1322	1322
1323	0	1	1	1	1	0	1	1	1	1	1	1	1	1	1	1	1	1	1	1	0	1	0	1	1	1	1	1	1	1	1	0		x	1323	x	1323	1323	x	x	1323	x	1323	1323	1323	1323	1323	1323	1323
1324	0	1	0	1	1	1	1	1	1	1	1	1	1	1	1	1	1	1	1	1	0	1	0	1	1	1	1	1	1	1	1	1		x	x	x	1324	1324	x	x	1324	x	1324	1324	1324	1324	1324	1324	1324
1325	0	1	1	1	1	1	1	1	0	1	1	1	1	1	1	1	1	1	1	1	1	1	0	1	1	1	1	1	1	1	1	1		x	x	1325	1325	1325	x	x	1325	x	1325	1325	1325	1325	1325	1325	1325
1326	0	1	1	1	1	1	1	1	1	1	1	1	1	1	1	1	1	1	1	1	1	1	1	1	1	1	1	1	1	1	1	0		x	x	x	1326	1326	x	x	1326	x	1326	1326	1326	1326	1326	1326	1326
1327	0	1	1	1	1	0	0	1	0	1	1	1	1	1	1	1	1	1	1	1	1	1	1	1	1	1	1	1	1	1	1	0		x	x	x	1327	1327	x	x	1327	x	1327	1327	1327	1327	1327	1327	1327
1328	0	0	1	1	1	1	0	1	0	1	1	1	1	1	1	1	1	1	1	1	1	1	0	1	1	1	1	1	1	1	1	0		x	x	x	1328	1328	x	x	1328	x	1328	1328	1328	1328	1328	1328	1328
1329	1	0	1	1	1	0	1	1	1	1	1	1	1	1	1	1	1	1	1	0	0	1	0	1	1	1	1	1	1	1	1	0		x	x	x	1329	1329	x	x	1329	1329	1329	1329	1329	1329	1329	1329	1329
1330	1	0	0	1	1	1	1	1	1	1	1	1	1	1	1	1	1	1	1	0	0	1	0	1	1	1	1	1	1	1	1	0		x	x	x	1330	1330	1330	x	1330	1330	1330	1330	1330	1330	1330	1330	1330
1331	0	0	1	1	1	1	1	1	1	1	1	1	1	1	1	1	1	1	1	1	0	1	0	1	1	0	1	1	1	1	1	0		x	x	1331	1331	1331	x	x	1331	1331	1331	1331	1331	1331	1331	1331	1331
1332	0	0	1	1	1	1	1	1	1	1	1	1	1	1	1	1	1	1	1	1	0	1	0	1	1	1	1	1	1	1	1	0		x	x	1332	1332	1332	x	x	1332	1332	1332	1332	x	1332	1332	1332	1332
1333	0	0	1	1	1	1	0	1	1	1	1	1	1	1	1	1	1	1	1	1	0	1	0	1	1	0	1	1	1	1	1	0		x	x	1333	1333	1333	x	x	1333	1333	1333	1333	x	1333	1333	1333	1333
1334	0	0	1	1	1	1	0	1	1	1	1	1	1	1	1	1	1	1	1	1	0	1	0	1	1	0	1	1	1	1	1	1		x	x	1334	1334	1334	x	x	1334	1334	1334	1334	x	1334	x	1334	1334
1335	1	1	1	1	1	0	1	1	1	1	1	1	1	1	1	1	1	1	1	1	0	1	0	1	1	0	1	1	1	1	1	1		1335	x	1335	1335	1335	x	1335	1335	1335	1335	1335	x	1335	x	1335	1335
1336	1	1	1	1	1	1	1	1	1	1	1	0	1	1	1	1	0	1	1	1	0	1	0	1	1	1	0	1	1	1	1	1		1336	x	1336	1336	1336	x	1336	1336	1336	1336	1336	x	1336	x	1336	1336
1337	1	1	1	1	1	1	1	1	1	1	1	1	1	1	1	1	0	1	1	1	0	1	0	1	1	1	0	1	1	1	1	1		1337	x	1337	1337	1337	x	1337	1337	1337	1337	1337	x	1337	x	1337	1337
1338	1	0	1	1	1	0	1	1	1	1	1	1	1	0	1	1	1	1	1	1	0	1	0	1	1	1	1	1	1	1	1	1		1338	x	1338	1338	1338	x	1338	1338	1338	1338	1338	x	1338	x	1338	1338
1339	1	0	1	1	1	0	1	1	1	1	1	1	1	0	1	1	1	1	1	1	0	1	0	1	1	0	1	1	1	1	1	1		x	x	1339	1339	x	x	x	1339	1339	1339	1339	x	1339	x	1339	1339
1340	1	0	1	1	1	0	1	1	1	1	1	1	1	0	1	1	1	1	1	1	0	1	0	1	1	1	1	1	1	1	1	1		x	x	1340	1340	x	x	x	1340	1340	1340	x	x	1340	x	1340	1340
1341	1	0	1	1	1	0	1	1	1	1	1	0	1	0	1	1	1	1	1	1	0	1	0	1	1	1	1	1	1	1	1	1		x	x	1341	1341	x	x	x	1341	1341	1341	x	x	1341	x	1341	1341
1342	1	0	1	1	1	0	1	1	1	1	1	1	1	1	1	1	1	1	1	1	0	1	0	1	1	0	1	1	1	1	1	0		x	x	1342	1342	x	x	x	1342	1342	1342	x	x	1342	1342	1342	1342
1343	0	0	1	1	0	0	0	1	1	1	1	0	1	1	1	1	1	1	1	1	0	1	0	1	1	0	1	1	1	1	1	0		x	x	1343	1343	x	x	x	1343	1343	1343	x	x	1343	1343	1343	1343
1344	0	1	1	1	0	1	1	1	1	1	0	1	1	1	1	1	1	1	1	1	0	1	0	0	1	1	1	1	1	1	1	0		x	1344	1344	1344	x	x	x	1344	1344	1344	x	1344	1344	1344	1344	1344
1345	0	1	1	1	0	1	1	1	1	1	1	1	1	1	1	1	1	1	1	1	0	1	0	0	1	1	1	1	1	1	1	1		x	1345	1345	1345	x	x	x	x	1345	1345	1345	1345	1345	1345	1345	1345
1346	0	1	1	1	0	0	0	1	1	1	1	1	1	1	1	1	0	1	1	1	0	1	0	0	1	1	1	1	1	1	1	1		x	1346	1346	1346	x	x	x	x	1346	1346	1346	1346	1346	1346	1346	1346
1347	0	1	1	1	0	0	0	1	1	1	1	1	1	1	1	1	1	1	1	1	0	1	0	1	1	1	1	1	1	1	1	1		x	1347	1347	1347	x	x	x	x	1347	1347	1347	1347	1347	1347	1347	1347
1348	1	1	1	1	0	0	1	1	1	1	1	1	1	1	1	1	1	1	1	1	0	1	0	0	1	1	1	1	1	1	1	1		x	1348	1348	1348	x	x	x	x	1348	1348	1348	1348	1348	1348	1348	1348
1349	0	1	1	1	0	0	0	0	1	1	1	1	1	1	1	1	1	1	1	1	0	1	0	0	1	1	0	1	1	1	1	1		x	1349	1349	1349	x	x	x	x	1349	1349	1349	x	1349	1349	1349	1349
1350	0	1	1	1	0	0	0	1	1	1	1	1	1	1	1	1	1	1	1	1	0	1	0	0	1	1	1	1	1	1	1	1		x	x	1350	1350	x	x	x	x	1350	1350	1350	x	1350	1350	1350	1350
1351	0	1	1	1	0	1	0	0	1	1	1	1	1	1	1	1	1	1	1	1	0	1	0	0	1	1	1	1	1	1	1	1		x	x	1351	1351	x	x	x	x	1351	1351	1351	x	1351	1351	1351	1351
1352	1	1	1	1	0	1	0	1	1	1	1	1	1	1	1	1	1	1	1	1	0	1	0	0	1	1	0	1	1	1	1	1		x	x	1352	1352	x	x	x	x	1352	1352	1352	x	1352	1352	1352	1352
1353	1	1	1	1	0	1	1	0	1	1	1	0	1	1	1	1	1	1	1	1	0	1	0	0	1	1	1	1	1	1	1	1		x	x	1353	1353	x	x	1353	x	1353	1353	1353	x	1353	1353	1353	1353
1354	0	0	1	1	0	1	1	0	1	1	1	0	1	1	1	1	1	1	1	1	0	1	0	0	1	1	0	1	1	1	1	1		x	x	1354	1354	x	x	1354	x	1354	1354	1354	x	1354	1354	1354	1354
1355	0	0	1	1	1	0	1	0	1	1	1	0	1	1	1	1	1	1	1	1	0	1	0	0	1	1	0	1	1	1	1	1		x	x	1355	1355	1355	x	1355	x	1355	1355	1355	x	1355	1355	1355	1355
1356	1	1	1	1	1	0	1	0	1	1	1	0	1	1	1	1	1	1	1	1	0	1	0	0	1	1	0	1	1	1	1	1		x	x	1356	1356	1356	x	1356	x	1356	1356	1356	x	1356	x	1356	1356
1357	1	1	1	1	1	0	1	0	1	1	1	1	1	1	1	1	1	1	1	1	1	1	0	0	1	1	1	1	1	1	1	1		x	x	1357	1357	1357	x	1357	x	1357	1357	1357	x	1357	x	1357	1357
1358	1	0	1	1	1	0	1	0	1	1	1	1	1	1	1	1	1	1	1	1	0	1	0	0	1	1	0	1	1	1	1	1		x	x	1358	1358	1358	x	1358	x	1358	1358	1358	x	1358	x	1358	1358
1359	0	0	1	1	1	0	1	0	1	1	1	0	1	1	1	1	1	1	1	1	0	1	0	0	1	1	0	1	1	1	1	1		x	x	1359	1359	1359	x	1359	x	1359	1359	1359	x	1359	x	1359	1359
1360	1	0	1	1	1	0	1	0	1	1	1	0	1	0	1	1	1	1	1	1	0	1	0	0	1	1	0	1	1	1	1	1		x	x	1360	1360	1360	x	1360	x	1360	1360	1360	x	1360	x	1360	1360
1361	1	0	1	1	1	0	1	0	1	1	1	1	1	0	1	1	1	1	1	1	0	1	1	0	1	1	0	1	1	1	1	1		x	x	1361	1361	1361	x	1361	x	1361	1361	1361	x	1361	x	1361	1361
1362	1	1	1	1	1	0	1	0	1	1	1	1	1	1	1	1	1	1	1	1	0	1	1	1	1	1	0	1	1	1	1	1		x	x	1362	1362	1362	x	1362	x	1362	1362	1362	x	1362	1362	1362	1362
1363	0	1	1	1	1	1	1	0	1	1	1	1	1	1	1	1	1	1	1	1	0	1	1	1	1	1	1	1	1	1	1	1		x	x	1363	1363	1363	x	1363	x	1363	1363	1363	x	1363	1363	1363	1363
1364	1	1	1	1	1	1	1	0	1	1	1	0	1	1	1	1	1	1	1	1	1	1	1	1	1	1	1	1	1	1	1	1		1364	x	1364	1364	1364	x	1364	x	1364	1364	1364	x	1364	1364	1364	1364
1365	1	1	1	1	1	0	1	0	1	1	1	0	1	1	1	1	1	1	1	1	1	1	1	1	0	1	1	1	1	1	1	1		x	x	1365	x	1365	x	1365	x	1365	1365	1365	x	1365	1365	1365	1365
1366	1	0	1	1	1	0	1	0	1	1	1	0	1	1	1	1	1	1	1	1	1	1	1	1	0	1	1	1	1	1	1	1		x	x	1366	x	1366	x	1366	x	1366	1366	1366	x	1366	1366	1366	1366
1367	1	0	1	1	1	0	1	0	1	1	1	0	1	1	1	1	1	1	1	1	1	1	1	1	1	1	1	1	1	1	1	1		x	x	1367	x	1367	x	1367	x	1367	1367	1367	x	1367	1367	1367	1367
1368	1	0	1	1	1	0	1	0	1	1	1	0	1	1	1	1	1	1	1	1	1	1	1	1	1	1	1	1	1	1	1	1		x	x	1368	x	1368	x	1368	x	1368	1368	1368	x	1368	1368	1368	1368
1369	0	1	1	0	1	1	1	0	1	1	1	0	1	1	1	1	1	1	1	1	1	1	1	1	1	1	1	1	1	1	1	1		x	1369	1369	x	1369	1369	1369	x	1369	1369	1369	x	1369	1369	1369	1369
1370	1	1	1	1	1	1	1	0	1	1	1	0	1	1	1	1	1	1	1	1	1	1	1	1	1	1	1	1	1	1	1	1		x	1370	1370	x	1370	1370	1370	x	1370	1370	1370	x	1370	1370	1370	1370
1371	0	1	1	1	1	1	1	0	1	1	1	1	1	1	1	1	1	1	1	1	1	1	1	1	1	1	1	1	1	1	1	1		x	1371	1371	x	1371	x	1371	x	1371	1371	1371	1371	1371	1371	1371	1371
1372	0	1	1	1	1	1	1	0	1	1	1	1	1	1	1	1	1	1	1	1	1	1	1	1	1	1	1	1	1	1	1	1		x	1372	1372	x	1372	x	1372	x	1372	1372	1372	1372	1372	1372	1372	1372
1373	0	1	1	0	1	1	1	0	1	1	1	1	1	1	1	1	1	1	1	1	1	1	1	1	1	1	0	1	1	1	1	1		x	1373	1373	x	1373	x	1373	x	1373	1373	1373	1373	1373	1373	1373	1373
1374	0	1	1	1	1	1	1	0	1	1	1	1	1	1	1	1	1	1	1	1	1	1	1	1	1	1	0	1	1	1	1	1		x	1374	1374	x	1374	x	1374	x	1374	1374	1374	1374	1374	1374	1374	1374
1375	0	1	1	0	1	0	1	0	1	1	1	1	1	1	1	1	1	1	1	1	1	1	1	1	0	1	0	1	1	1	1	1		x	1375	1375	x	1375	x	1375	x	1375	1375	1375	1375	1375	1375	1375	1375
1376	0	1	1	0	1	0	1	0	1	1	1	1	1	1	1	1	1	1	1	1	1	1	1	1	1	1	0	1	1	1	1	1		x	1376	1376	x	1376	x	1376	x	1376	1376	1376	1376	x	1376	1376	x
1377	1	1	1	1	1	0	1	0	1	1	1	1	1	1	1	1	0	1	1	1	1	1	1	1	1	1	0	1	1	1	1	1		x	x	x	x	1377	x	1377	x	1377	1377	1377	1377	x	1377	1377	x
1378	0	1	1	0	1	1	1	0	1	1	1	1	1	1	1	1	0	1	1	1	1	1	1	1	1	1	0	1	1	1	1	1		x	x	x	x	1378	1378	1378	x	1378	1378	1378	x	x	1378	1378	x
1379	0	1	1	1	1	1	1	0	1	1	1	1	1	1	1	1	0	1	1	1	1	1	1	1	1	1	0	1	1	1	1	1		x	x	x	x	1379	1379	1379	x	1379	1379	1379	x	x	1379	1379	x
1380	0	1	1	1	1	1	1	0	1	1	1	1	0	1	1	0	0	1	1	1	1	1	1	1	1	1	0	1	1	1	1	1		x	x	x	x	1380	1380	1380	x	1380	1380	1380	x	x	1380	1380	x
1381	0	0	0	0	1	1	1	0	1	1	1	1	0	1	1	0	0	1	1	1	1	1	1	1	1	1	0	1	1	1	1	1		x	x	x	x	1381	1381	1381	x	1381	1381	1381	x	x	1381	1381	x
1382	1	0	0	1	1	1	1	0	1	1	1	0	0	1	1	0	0	1	1	1	1	1	1	1	1	1	0	1	1	1	1	1		x	x	x	x	1382	1382	1382	x	1382	1382	1382	x	x	1382	1382	x
1383	1	0	1	0	1	1	1	0	1	1	1	1	0	1	1	0	0	1	1	1	1	1	1	1	1	1	0	1	1	1	1	1		x	x	x	x	1383	1383	1383	x	1383	1383	1383	1383	x	1383	1383	x
1384	1	0	0	1	1	1	1	0	1	1	1	1	0	1	1	0	0	1	1	1	1	1	1	1	1	1	0	1	1	1	1	0		x	x	x	1384	1384	1384	1384	x	1384	1384	1384	1384	x	1384	1384	x
1385	1	0	0	1	1	1	1	1	1	1	1	1	0	1	1	0	0	1	1	0	1	1	1	1	1	1	1	1	1	1	1	0		x	x	x	1385	1385	1385	1385	x	1385	1385	1385	1385	x	1385	1385	x
1386	0	1	0	1	1	1	1	1	1	1	1	1	0	1	1	0	0	1	1	0	1	1	1	1	1	1	0	1	1	1	1	1		x	1386	x	1386	1386	1386	1386	x	1386	1386	1386	1386	x	1386	1386	x
1387	0	1	0	1	1	1	1	0	1	1	1	1	0	1	1	1	0	1	1	1	1	1	1	1	1	1	0	1	1	1	1	1		x	1387	x	1387	1387	1387	1387	x	1387	1387	1387	1387	x	1387	1387	x
1388	0	1	0	1	1	1	1	0	1	1	1	1	0	1	1	0	0	0	1	1	1	1	1	1	1	1	0	1	1	1	1	0		x	1388	x	1388	1388	1388	1388	x	1388	1388	1388	1388	x	1388	1388	x
1389	0	1	0	1	1	1	1	0	1	1	1	1	0	1	1	0	0	1	1	1	1	1	1	1	1	1	0	1	1	1	1	0		x	x	x	1389	1389	1389	1389	x	1389	1389	1389	1389	x	1389	1389	x
1390	0	1	0	1	1	1	1	0	1	1	1	1	0	1	1	0	0	1	1	1	1	1	1	1	1	1	0	1	1	1	1	0		x	x	x	1390	1390	1390	1390	x	x	1390	1390	1390	x	1390	1390	x
1391	0	1	0	1	1	1	1	0	1	1	1	1	0	1	1	0	0	1	1	1	1	1	1	1	1	1	0	1	1	1	1	0		x	x	x	1391	1391	1391	1391	x	x	1391	1391	1391	x	1391	1391	x
1392	0	1	1	1	1	1	1	0	1	1	1	1	0	1	1	0	0	1	1	1	1	1	1	1	1	1	0	1	1	1	1	0		x	x	x	1392	1392	1392	1392	x	x	1392	1392	1392	x	1392	1392	x
1393	0	0	0	1	1	1	1	0	1	1	1	1	0	1	1	0	0	1	1	1	1	1	1	1	1	1	0	1	1	1	1	0		x	x	x	1393	1393	1393	1393	x	x	1393	1393	1393	x	1393	1393	x
1394	0	0	0	1	1	1	1	0	0	1	1	1	0	1	1	0	0	0	1	1	1	1	1	1	1	1	0	1	1	1	1	0		x	x	x	1394	1394	1394	1394	x	x	1394	1394	1394	x	1394	1394	x
1395	0	1	0	1	1	1	1	0	0	1	1	1	0	1	1	0	0	0	1	1	1	1	1	1	1	1	0	1	1	1	1	0		x	1395	x	1395	1395	1395	1395	x	x	x	1395	1395	x	1395	1395	x
1396	0	1	0	1	1	1	1	0	0	1	1	1	0	1	1	1	0	0	1	1	1	1	1	1	1	1	0	1	1	1	1	0		x	1396	x	1396	1396	1396	1396	x	x	x	1396	1396	x	1396	1396	x
1397	0	1	1	1	1	1	1	0	0	1	1	1	0	1	1	0	1	0	1	1	1	1	1	1	1	1	0	1	1	1	1	0		x	1397	x	1397	1397	1397	1397	x	x	x	1397	1397	x	1397	1397	x
1398	0	1	0	1	1	1	1	0	1	1	1	1	0	1	1	0	0	0	1	1	1	1	1	1	1	1	0	1	1	1	1	0		x	1398	x	1398	1398	1398	1398	x	1398	x	1398	1398	x	1398	1398	x
1399	1	1	0	1	1	1	1	0	1	0	1	1	0	1	1	0	1	0	1	1	1	1	1	1	1	1	0	1	1	1	1	0		1399	1399	x	1399	1399	1399	1399	x	1399	x	1399	1399	x	1399	1399	x
1400	1	1	0	1	1	1	1	0	1	0	1	1	0	1	1	0	0	0	0	1	1	1	1	1	1	1	0	1	1	1	1	0		x	1400	x	1400	1400	1400	1400	x	1400	x	1400	1400	x	1400	1400	x
1401	1	1	0	1	1	1	1	1	1	0	1	1	0	1	1	0	0	0	0	1	1	1	1	1	1	1	1	1	1	1	1	0		x	1401	x	1401	1401	1401	1401	x	1401	x	1401	1401	x	1401	1401	x
1402	1	1	1	1	1	1	1	1	1	1	1	1	0	1	1	0	0	0	0	1	0	1	1	1	1	1	1	1	1	1	1	1		x	1402	x	1402	1402	1402	1402	x	x	x	1402	1402	x	1402	1402	x
1403	1	1	0	1	1	1	1	0	1	1	1	1	0	1	1	0	0	0	0	1	0	1	1	1	1	1	1	1	1	0	1	1		x	x	x	1403	1403	1403	1403	x	x	x	1403	1403	x	1403	1403	x
1404	0	1	0	1	1	1	1	0	1	1	1	1	0	1	1	0	0	0	0	1	0	1	1	1	1	1	1	1	1	0	1	1		x	x	x	1404	1404	1404	1404	x	x	x	1404	1404	x	1404	1404	x
1405	0	1	0	1	1	1	1	0	1	1	1	1	0	1	1	1	0	0	0	1	0	1	1	1	1	1	1	1	1	1	0	1		x	x	x	1405	1405	1405	1405	x	x	x	1405	1405	x	1405	x	x
1406	0	1	0	1	1	1	1	0	0	0	1	1	0	1	1	1	0	0	0	1	0	1	1	1	1	1	1	1	1	1	0	1		x	x	x	1406	1406	1406	1406	x	x	x	1406	1406	x	1406	x	x
1407	0	0	1	1	1	1	1	0	1	0	1	1	0	1	1	1	0	0	0	1	0	1	1	1	1	1	1	1	1	1	0	1		x	x	x	1407	1407	1407	1407	x	1407	x	1407	1407	x	1407	x	x
1408	0	0	0	1	1	1	1	0	1	0	1	1	0	1	1	0	0	0	0	1	0	1	1	1	1	1	1	1	1	1	1	1		x	x	x	1408	x	x	1408	x	x	x	1408	1408	x	1408	x	x
1409	0	0	0	1	1	1	1	0	1	0	1	1	0	1	0	0	0	0	0	1	0	1	1	1	1	1	1	1	1	1	1	1		x	x	x	1409	x	x	1409	x	x	x	1409	1409	x	1409	x	x
1410	0	1	0	1	1	1	1	0	1	0	1	1	0	1	0	0	0	0	0	1	0	1	1	1	0	1	1	1	1	1	0	1		x	x	x	1410	x	x	1410	x	x	x	1410	1410	x	1410	x	x
1411	0	0	0	1	1	1	1	0	1	1	1	1	0	1	0	0	0	0	0	1	0	1	1	1	1	1	1	1	1	1	0	1		x	x	x	1411	x	x	1411	x	x	1411	1411	1411	x	1411	x	x
1412	1	0	0	1	0	0	1	0	0	1	1	1	0	1	0	0	0	0	0	1	0	1	1	1	1	1	1	1	1	1	1	1		x	x	x	1412	x	x	1412	x	x	1412	1412	x	x	1412	x	x
1413	0	1	0	1	0	0	1	0	0	1	1	1	0	1	0	0	0	0	0	1	0	1	1	1	1	1	1	1	1	1	1	1		x	1413	x	1413	x	x	1413	x	x	1413	1413	x	x	1413	x	x
1414	1	1	1	1	0	0	1	0	0	1	1	1	0	1	0	0	0	0	0	0	0	1	1	1	1	1	1	1	1	1	1	1		x	1414	1414	1414	x	x	1414	x	x	1414	1414	x	x	1414	x	x
1415	1	1	1	1	0	0	1	1	0	1	1	1	0	1	0	0	0	0	0	0	0	1	1	1	1	1	1	0	1	1	1	1		x	1415	1415	1415	x	x	1415	x	x	1415	1415	x	x	1415	x	x
1416	0	1	1	1	0	0	1	1	1	1	1	0	0	1	0	0	0	0	0	0	0	1	1	1	1	1	1	1	1	1	1	1		x	x	1416	1416	x	x	1416	x	x	1416	1416	x	x	1416	x	x
1417	0	1	1	1	0	0	1	0	0	1	1	0	0	1	0	1	0	1	0	0	0	1	1	1	1	1	1	1	1	1	1	1		x	x	x	1417	x	x	1417	x	x	1417	1417	x	x	1417	x	x
1418	0	1	1	1	0	0	1	0	0	1	1	1	0	1	0	0	0	0	0	0	0	0	1	1	1	1	1	1	1	1	1	1		x	x	x	1418	x	x	1418	x	x	1418	1418	1418	x	1418	x	x
1419	0	1	1	1	1	0	1	0	0	1	1	1	1	1	1	0	0	0	0	0	0	0	1	1	1	1	1	1	1	1	1	1		x	x	x	1419	x	x	1419	x	x	1419	1419	1419	x	1419	x	x
1420	1	0	1	1	0	1	1	0	0	1	1	1	0	1	0	1	0	0	0	0	0	0	1	1	1	0	1	1	1	1	1	1		1420	x	x	1420	x	x	1420	x	x	1420	1420	1420	x	1420	x	x
1421	1	0	0	1	0	1	1	0	1	1	1	1	0	1	0	0	0	0	0	0	1	0	1	1	1	0	1	1	1	1	1	1		1421	x	x	1421	x	x	1421	x	x	1421	1421	1421	x	1421	x	x
1422	1	0	0	1	0	1	1	0	1	1	1	1	0	1	0	0	0	0	0	0	0	0	1	1	1	0	1	1	1	1	1	1		1422	x	x	1422	x	x	1422	x	x	1422	1422	1422	x	1422	x	x
1423	1	1	0	1	0	1	1	0	1	1	1	1	0	1	0	0	0	0	0	0	0	0	1	1	1	0	0	1	1	1	1	1		1423	x	x	1423	x	x	1423	x	x	x	1423	1423	x	1423	x	x
1424	1	1	0	1	0	0	1	0	0	1	1	1	0	1	1	0	0	0	0	0	0	0	1	1	1	0	0	1	1	1	1	1		x	x	x	1424	x	x	1424	x	x	x	1424	1424	x	1424	x	x
1425	1	1	0	1	0	0	1	0	0	1	1	1	0	1	0	0	0	0	0	0	0	0	1	1	1	0	0	1	1	1	1	1		x	x	x	x	x	x	1425	x	x	x	1425	1425	x	1425	x	x
1426	1	1	0	1	0	0	1	0	0	1	1	1	0	1	0	0	0	0	0	0	1	0	1	1	1	0	0	1	1	1	1	1		x	x	x	x	x	x	1426	x	x	x	1426	1426	x	1426	x	x
1427	1	0	0	1	0	1	1	1	0	0	1	1	0	1	0	0	0	0	0	0	1	0	1	1	1	0	0	1	1	1	1	1		x	x	x	x	x	1427	1427	x	x	x	1427	x	x	1427	x	x
1428	0	0	0	1	0	1	1	0	0	0	1	1	0	1	0	0	0	1	0	0	0	0	1	1	1	0	0	1	1	1	1	1		x	x	x	x	x	x	1428	x	x	x	1428	x	x	1428	x	x
1429	0	0	0	0	0	1	1	0	0	0	1	1	0	1	0	0	0	1	0	0	0	0	1	1	1	0	0	1	1	1	1	1		x	x	x	x	x	x	1429	x	x	x	1429	x	x	1429	x	x
1430	0	1	0	0	0	1	1	0	1	1	1	1	0	1	1	0	0	1	0	0	0	0	1	1	1	0	0	1	1	1	1	1		x	x	x	x	x	x	x	x	x	1430	1430	x	x	1430	x	x
1431	0	1	0	0	0	1	1	0	0	1	1	0	0	1	0	0	0	1	0	0	0	0	1	1	0	0	0	1	1	1	1	1		x	x	x	x	x	x	x	x	x	1431	1431	x	x	1431	x	x
1432	0	0	0	0	0	0	1	0	0	1	1	1	0	1	1	0	0	1	0	0	0	0	1	1	1	0	0	1	1	1	1	1		x	x	x	x	x	x	x	x	x	1432	1432	x	x	1432	x	x
1433	0	0	1	0	0	0	1	0	0	1	1	1	0	1	0	0	0	0	0	0	0	0	1	1	1	0	0	1	1	1	1	1		x	x	x	x	x	x	x	x	x	1433	1433	x	x	1433	x	x
1434	0	0	0	1	0	0	0	0	0	1	1	0	0	1	0	1	0	0	0	0	0	0	1	1	1	0	0	1	1	1	0	1		x	x	x	x	x	x	x	x	x	1434	1434	x	x	1434	x	x
1435	0	0	0	0	0	0	0	0	0	1	1	1	0	1	0	0	0	0	0	0	0	0	1	1	1	0	0	1	1	1	1	1		x	x	x	x	x	x	x	x	x	1435	1435	1435	x	1435	x	x
1436	0	0	1	1	0	0	0	0	0	1	1	1	0	1	0	0	0	0	0	0	0	0	1	1	0	0	0	1	1	1	1	1		x	x	x	1436	x	x	x	x	x	1436	1436	1436	x	x	x	x
1437	0	0	0	1	0	0	1	0	1	1	1	1	0	1	0	0	0	0	0	0	0	0	1	1	1	0	0	1	1	1	1	1		x	x	x	x	x	x	x	x	x	x	x	x	x	x	x	x
1438	0	0	0	1	0	0	1	0	0	1	1	1	0	1	0	0	1	0	0	0	0	0	1	1	1	0	0	0	1	1	0	1		x	x	x	x	x	x	x	x	x	x	x	x	x	x	x	x
1439	0	0	0	1	0	0	1	0	0	1	1	1	0	1	0	0	0	0	0	0	0	0	1	1	1	0	1	0	1	1	0	1		x	x	x	x	x	x	x	x	x	x	x	x	x	x	x	x
1440	0	0	0	1	0	0	0	1	0	1	1	1	0	0	0	0	0	0	0	0	0	0	1	1	1	0	1	0	1	1	0	1		x	x	x	x	x	x	x	x	x	x	x	x	x	x	x	x
[truncated: 338 more columns]

## Sheet: sleep mins per 30mins
30mints	time (min)	ch1	ch2	ch3	ch4	ch5	ch6	ch7	ch8	ch9	ch10	ch11	ch12	ch13	ch14	ch15	ch16	ch17	ch18	ch19	ch20	ch21	ch22	ch23	ch24	ch25	ch26	ch27	ch28	ch29	ch30	ch31	ch32
1	1	0	5	0	0	0	0	0	0	0	0	0	0	0	0	0	0	0	0	0	0	0	0	0	0	0	0	0	0	0	0	0	0
	2	0	5	0	0	0	0	0	0	0	0	0	0	0	0	0	0	0	0	0	0	0	0	0	0	0	0	0	0	0	0	0	0
	3	0	5	0	0	0	0	0	0	0	0	0	0	0	0	0	0	0	0	0	0	0	0	0	0	0	0	0	0	0	0	0	0
	4	0	5	0	0	0	0	0	0	0	0	0	0	0	0	0	0	0	0	0	0	0	0	0	0	0	0	0	0	0	0	0	0
	5	0	5	0	0	0	0	0	0	0	0	0	0	0	0	0	0	0	0	0	0	0	0	0	0	0	0	0	0	0	0	0	0
	6	0	5	0	0	0	0	0	0	0	0	0	0	0	0	0	0	0	0	0	0	0	0	0	0	0	0	0	0	0	0	0	0
	7	0	5	0	0	0	0	0	0	0	0	0	0	0	0	0	0	0	0	0	0	0	0	0	0	0	0	0	0	0	0	0	0
	8	0	5	0	0	0	0	0	0	0	0	0	0	0	0	0	0	0	0	0	0	0	0	0	0	0	0	0	0	0	0	0	0
	9	0	5	0	0	0	0	0	0	0	0	0	0	0	0	0	0	0	0	0	0	0	0	0	0	0	0	0	0	0	0	0	0
	10	0	5	0	0	0	0	0	0	0	0	0	0	0	0	0	0	0	0	0	0	0	0	0	0	0	0	0	0	0	0	0	0
	11	0	5	0	0	0	0	0	0	0	0	0	0	0	1	0	0	0	0	0	0	0	0	0	0	0	0	0	0	0	0	0	0
	12	0	5	0	0	0	0	0	0	0	0	0	0	0	2	0	0	0	0	0	0	0	0	0	0	0	0	0	0	0	0	0	0
	13	0	5	0	0	0	0	0	0	0	1	0	0	0	3	0	0	0	0	0	0	0	0	0	0	0	0	0	0	0	0	0	0
	14	0	5	0	0	0	0	0	0	0	2	0	0	0	4	0	0	0	0	0	0	0	0	0	0	0	0	0	0	0	0	0	0
	15	0	5	0	0	0	0	0	0	0	3	0	0	0	5	0	0	0	0	0	0	0	0	0	0	0	0	0	0	0	0	0	0
	16	0	5	0	0	0	0	0	0	0	4	0	0	0	6	0	0	0	0	0	0	0	0	0	0	0	0	0	0	0	0	0	0
	17	0	5	0	0	0	0	0	0	0	5	0	0	0	7	0	0	0	0	0	0	0	0	0	0	0	0	0	0	0	0	0	0
	18	0	5	0	0	0	0	0	0	0	5	0	0	0	7	0	0	0	0	0	0	0	0	0	0	0	0	0	0	0	0	0	0
	19	0	5	0	0	0	0	0	0	0	5	0	0	0	7	0	0	0	0	0	0	0	0	0	0	0	0	0	0	0	0	0	0
	20	0	5	0	0	0	0	0	0	0	5	0	0	0	7	0	0	0	0	0	0	0	0	0	0	0	0	0	0	0	0	0	0
	21	0	5	0	0	0	0	0	0	0	5	0	0	0	7	0	0	0	0	0	0	0	0	0	0	0	0	0	0	0	0	0	0
	22	0	5	0	0	0	0	0	0	0	5	0	0	0	7	0	0	0	0	0	0	0	0	0	0	0	0	0	0	0	0	0	0
	23	0	5	0	0	0	0	0	0	0	5	0	0	0	7	0	0	0	0	0	0	0	0	0	0	0	0	0	0	0	0	0	0
	24	0	5	0	0	0	0	0	0	0	5	0	0	0	7	0	0	0	0	0	0	0	0	0	0	0	0	0	0	0	0	0	0
	25	0	5	0	1	0	0	0	0	0	5	0	0	0	7	0	0	0	0	0	0	0	0	0	0	0	0	0	0	0	0	0	0
	26	0	5	0	2	0	0	0	0	0	6	0	0	0	7	0	0	0	0	0	0	0	0	0	0	0	0	0	0	0	0	0	0
	27	0	4	0	3	0	0	0	0	1	7	0	0	0	7	0	0	0	0	0	0	0	0	0	0	0	0	0	0	0	0	0	0
	28	0	3	0	4	0	0	0	0	2	8	0	0	0	7	0	0	0	0	0	0	0	0	0	0	0	0	0	0	0	0	0	0
	29	0	2	0	5	0	0	1	0	3	9	0	0	0	8	0	0	0	0	0	0	0	0	0	0	0	0	0	0	0	0	0	0
	30	0	1	0	6	0	0	2	0	4	10	0	0	0	9	0	0	0	0	0	0	0	0	0	0	0	0	0	0	0	0	0	0
1	31	0	0	0	7	0	0	3	0	5	11	0	0	0	10	0	0	0	0	0	0	0	0	0	0	0	0	0	0	0	0	0	0
	32	0	0	0	8	0	0	4	0	6	12	0	0	0	11	0	0	0	0	0	0	0	0	0	0	0	0	0	0	0	0	0	0
	33	0	0	0	9	0	0	5	0	7	13	0	0	0	12	0	0	0	0	0	0	0	0	0	0	0	0	0	0	0	0	0	0
	34	0	0	0	10	0	0	6	0	8	14	0	0	0	13	0	0	0	0	0	0	0	0	0	0	0	0	0	0	0	0	0	0
	35	0	0	0	11	0	0	7	0	9	15	0	0	0	14	0	0	0	0	0	0	0	0	0	0	0	0	0	0	0	0	0	0
	36	0	0	0	12	0	0	8	0	10	16	0	0	0	14	0	0	0	0	0	0	0	0	0	0	0	0	0	0	0	0	0	0
	37	0	0	0	13	0	0	9	0	11	17	0	0	0	14	0	0	0	0	0	0	0	0	0	0	0	0	0	0	0	0	0	0
	38	0	0	0	14	0	0	10	0	12	18	0	0	0	14	0	0	0	0	0	0	0	0	0	0	0	0	0	0	0	0	0	0
	39	0	0	0	15	0	0	11	0	13	19	0	0	0	14	0	0	0	0	0	0	0	0	0	0	0	0	0	0	0	0	0	0
	40	0	0	0	16	0	0	12	0	13	19	0	0	0	14	0	0	0	0	0	0	0	0	0	0	0	0	0	0	0	0	0	0
	41	0	0	0	17	0	0	13	0	13	20	0	0	0	14	0	0	0	0	0	0	0	0	0	0	0	0	0	0	0	0	0	0
	42	0	0	0	18	0	0	14	0	13	21	0	0	0	14	0	0	0	0	0	0	0	0	0	0	0	0	0	0	0	0	0	0
	43	0	0	0	19	0	0	14	0	13	21	0	1	0	14	0	0	0	0	0	0	0	0	0	0	0	0	0	0	0	0	0	0
	44	0	0	0	20	0	0	14	0	14	21	0	2	0	14	0	0	0	0	0	0	0	0	0	0	0	0	0	0	0	0	0	0
	45	0	0	0	21	0	0	14	0	15	21	0	3	0	14	0	0	0	0	0	0	0	0	0	0	0	0	0	0	0	0	0	0
	46	0	0	0	22	0	0	14	0	16	21	0	4	0	14	0	0	0	0	0	0	0	0	0	0	0	0	0	0	0	0	0	0
	47	0	0	0	23	0	0	14	0	17	21	0	5	0	14	0	0	0	0	0	0	0	0	0	0	0	0	0	0	0	0	0	0
	48	0	0	0	24	0	0	14	0	18	22	0	6	0	15	0	0	0	0	0	0	0	0	0	0	0	0	0	0	0	0	0	0
	49	0	0	0	25	0	0	14	0	19	23	0	7	0	16	0	0	0	0	0	0	0	0	0	0	0	0	0	0	0	0	0	0
	50	0	0	0	26	0	0	14	0	20	24	0	8	0	17	0	0	0	0	0	0	0	0	0	0	0	0	0	0	0	0	0	0
	51	0	0	0	27	0	0	14	0	21	25	0	8	0	18	0	0	0	0	0	0	0	0	0	0	0	0	0	0	0	0	0	0
	52	0	0	0	28	0	0	15	0	21	26	0	8	0	19	0	0	0	0	0	0	0	0	0	0	0	0	0	0	0	0	0	0
	53	0	0	0	29	0	0	16	0	21	27	0	8	0	20	0	0	0	0	0	0	0	0	0	0	0	0	0	0	0	0	0	0
	54	0	0	0	30	0	0	17	0	21	28	0	8	0	21	0	0	0	0	0	0	0	0	0	0	0	0	0	0	0	0	0	0
	55	0	0	0	30	0	0	18	0	21	29	0	8	0	22	0	0	0	0	0	0	0	0	0	0	0	0	0	0	0	0	0	0
	56	0	0	0	29	0	0	19	0	21	29	0	8	0	23	0	0	0	0	0	0	0	0	0	0	0	0	0	0	0	0	0	0
	57	0	0	0	28	0	0	19	0	20	29	0	8	0	24	0	0	0	0	0	0	0	0	0	0	0	0	0	0	0	0	0	0
	58	0	0	0	27	1	0	19	0	19	29	0	9	0	25	0	1	0	0	0	0	0	0	0	0	0	0	0	0	0	0	0	0
	59	0	0	0	26	2	0	18	0	18	29	0	10	0	24	0	2	0	0	0	0	0	0	0	0	0	0	0	0	0	0	0	0
	60	0	0	0	25	3	0	17	0	17	29	0	11	0	23	0	3	0	0	0	0	0	0	0	0	0	0	0	0	0	0	0	0
1	61	0	0	0	24	4	0	16	0	16	29	0	12	0	22	0	4	0	0	0	0	0	0	0	0	0	0	0	0	0	0	0	0
	62	0	0	0	23	5	0	15	0	15	29	0	13	0	22	0	5	0	0	0	0	0	0	0	0	0	0	0	0	0	0	0	0
	63	0	0	0	22	6	0	14	0	14	29	0	14	0	22	0	6	0	0	0	0	0	0	0	0	0	0	0	0	0	0	0	0
	64	0	0	0	21	7	0	13	0	13	29	0	15	0	22	0	7	0	0	0	0	0	0	0	0	0	0	0	0	0	0	0	0
	65	0	0	0	20	8	0	13	0	12	29	0	16	0	22	0	8	0	0	0	0	0	0	0	0	0	0	0	0	0	0	0	0
	66	0	0	0	19	9	0	13	0	11	29	0	17	0	23	0	9	0	0	0	0	0	0	0	0	0	0	0	0	0	0	0	0
	67	0	0	0	18	10	0	13	0	11	29	0	17	0	24	0	10	0	0	0	0	0	0	0	0	0	0	0	0	0	0	0	0
	68	0	0	0	17	11	0	13	0	11	29	0	17	0	25	0	11	0	0	0	0	0	0	0	0	0	0	0	0	0	0	0	0
	69	0	0	0	16	12	0	13	0	11	29	0	17	0	26	0	12	0	0	0	0	0	0	0	0	0	0	0	0	0	0	0	0
	70	0	0	0	15	12	0	13	0	12	30	0	17	0	27	0	13	0	0	0	0	0	0	0	0	0	0	0	0	0	0	0	0
	71	0	0	0	14	12	0	13	0	13	30	0	17	0	27	0	14	0	0	0	0	0	0	0	0	0	0	0	0	0	0	0	0
	72	0	0	0	13	12	1	13	0	14	30	0	17	0	27	0	15	0	0	0	0	0	0	0	0	0	0	0	0	0	0	0	0
	73	0	0	0	12	12	2	14	0	15	30	0	17	0	27	0	16	0	0	0	0	0	0	0	0	0	0	0	0	0	0	0	0
	74	0	0	0	11	13	3	15	0	15	30	0	17	0	27	0	16	0	0	0	0	0	0	0	0	0	0	0	0	0	0	0	0
	75	0	0	0	10	14	4	16	0	15	30	0	17	0	27	0	16	0	0	0	0	0	0	0	0	0	0	0	0	0	0	0	0
	76	0	0	0	10	15	5	17	0	15	30	0	17	0	27	0	16	0	0	0	0	0	0	0	0	0	0	0	0	0	0	0	0
	77	0	0	0	10	16	6	18	0	15	30	0	17	0	26	0	16	0	0	0	0	0	0	0	0	0	0	0	0	0	0	0	0
	78	0	0	0	10	17	7	19	0	15	30	0	17	0	25	0	16	0	0	0	0	0	0	0	0	0	0	0	0	0	0	0	0
	79	0	0	1	10	18	8	20	0	14	30	0	17	0	24	0	16	0	0	0	0	0	0	0	0	0	0	0	0	0	0	0	0
	80	0	0	2	10	19	9	21	0	14	30	0	17	0	23	0	16	0	0	0	0	0	0	0	0	0	0	0	0	0	0	0	0
	81	0	0	3	10	20	10	22	0	14	30	0	18	0	23	0	16	0	0	0	0	0	0	0	0	0	0	0	0	0	0	0	0
	82	0	0	4	10	21	11	21	0	15	30	0	19	0	23	0	16	0	0	0	0	0	0	0	0	0	0	0	0	0	0	0	0
	83	0	0	5	10	22	12	20	0	16	30	0	20	0	23	0	16	0	0	0	0	0	0	0	0	0	0	0	0	0	0	0	0
	84	0	0	5	10	22	13	19	0	17	30	0	21	0	23	0	17	0	0	0	0	0	0	0	0	0	0	0	0	0	0	0	0
	85	0	0	5	10	22	14	18	0	18	30	0	22	0	23	0	18	0	0	0	0	0	0	0	0	0	0	0	0	0	0	0	0
	86	0	0	5	10	22	15	17	0	19	30	0	23	0	23	0	19	0	0	0	0	0	0	0	0	0	0	0	0	0	0	0	0
	87	0	0	5	10	23	16	18	0	19	30	0	23	0	23	0	20	0	0	0	0	0	0	0	0	0	0	0	0	0	0	0	0
	88	0	0	5	11	23	17	19	0	19	30	0	22	0	23	0	20	0	0	0	0	0	0	0	0	0	0	0	0	0	0	0	0
	89	0	0	5	12	23	18	20	0	19	30	0	22	0	24	0	20	0	0	0	0	0	0	0	0	0	0	0	0	0	0	0	0
	90	0	0	5	13	23	19	21	0	19	30	0	22	0	25	0	20	0	0	0	0	0	0	0	0	0	0	0	0	0	0	0	0
1	91	0	0	5	14	23	20	22	0	19	30	0	22	0	26	0	20	0	0	0	0	0	0	0	0	0	0	0	0	0	0	0	0
	92	0	0	5	15	23	21	23	0	19	30	0	22	0	26	0	20	0	0	0	0	0	0	0	0	0	1	0	0	0	0	0	0
	93	0	0	5	16	23	22	24	0	19	30	0	22	0	26	0	20	0	0	0	0	0	0	0	0	0	2	0	0	0	0	0	0
	94	0	0	5	17	23	23	25	0	19	30	0	22	0	26	0	20	0	0	0	0	0	0	0	0	0	3	0	0	0	0	0	0
	95	0	0	5	18	23	24	25	0	19	30	0	22	0	26	0	20	0	0	0	0	0	0	0	0	0	4	0	0	0	0	0	0
	96	0	0	5	19	22	25	25	0	19	30	0	22	0	26	0	20	0	0	0	0	0	0	0	0	0	5	0	0	0	0	0	0
	97	0	0	5	20	21	26	25	0	18	30	0	23	0	26	0	20	0	0	0	0	0	0	0	0	0	5	0	0	0	0	0	0
	98	0	0	5	21	21	27	25	0	17	30	0	24	0	26	0	20	0	0	0	0	0	0	0	0	0	5	0	0	0	0	0	0
	99	0	0	5	22	21	28	25	0	16	30	0	25	0	26	0	20	0	0	0	0	0	0	0	0	0	5	0	0	0	0	0	0
	100	0	0	5	23	22	29	24	0	15	30	0	26	0	26	0	20	0	0	0	0	0	0	0	0	0	5	0	0	0	0	0	0
	101	0	0	5	24	23	30	23	0	14	30	0	27	0	26	0	20	0	0	0	0	0	0	0	0	0	5	0	0	0	0	0	0
	102	0	0	5	25	24	30	23	0	13	30	0	28	0	26	0	20	0	0	0	0	0	0	0	0	0	5	0	0	0	0	0	0
	103	0	0	5	26	25	30	23	0	12	30	0	28	0	26	0	20	0	0	0	0	0	0	0	0	0	5	0	0	0	0	0	0
	104	0	0	5	27	25	30	23	0	11	30	0	28	0	26	0	21	0	0	0	0	0	0	0	0	0	5	0	0	0	0	0	0
	105	0	1	5	28	25	30	23	0	10	30	0	28	0	26	0	22	1	0	0	0	0	0	0	0	0	5	0	0	0	0	0	0
	106	0	2	5	28	25	30	23	0	9	30	0	28	0	26	0	23	2	0	0	0	0	0	0	0	0	5	0	0	0	0	0	0
	107	0	3	5	28	25	30	23	0	9	30	0	28	0	27	0	24	3	0	0	0	0	0	0	0	0	5	0	0	0	0	0	0
	108	0	4	5	28	25	30	23	0	9	30	0	28	0	28	0	25	4	0	0	0	0	0	0	0	0	5	0	0	0	0	0	0
	109	0	5	4	28	25	30	23	0	10	30	0	28	0	29	0	26	5	0	0	0	0	0	0	0	0	5	0	0	0	0	0	0
	110	0	6	3	28	25	30	23	0	10	30	0	28	1	30	0	27	6	0	0	0	0	0	0	0	0	5	0	0	0	0	0	0
	111	0	6	2	28	25	30	23	0	10	30	0	28	2	30	0	28	7	0	0	0	0	0	0	0	0	5	0	0	0	0	0	0
	112	0	6	1	28	25	30	24	0	10	30	0	28	3	30	0	29	8	0	0	0	0	0	0	0	0	5	0	0	0	0	0	0
	113	0	6	0	28	25	30	25	0	10	30	0	28	4	30	0	30	9	0	0	0	0	0	0	0	0	5	0	0	0	0	0	0
	114	0	6	0	28	26	30	26	0	10	30	0	28	5	30	0	30	9	0	0	0	0	0	0	0	0	5	0	0	0	0	0	0
	115	0	6	0	28	27	30	27	0	10	30	0	28	6	30	0	30	9	0	0	0	0	0	0	0	0	5	0	0	0	0	0	0
	116	0	6	0	29	28	30	28	0	10	30	0	28	7	30	0	30	9	0	0	0	0	0	0	0	0	5	0	0	0	0	0	0
	117	0	6	0	30	28	30	28	0	11	30	0	29	8	30	0	30	9	0	0	0	0	0	0	0	0	5	0	0	0	0	0	0
	118	0	6	0	30	28	30	28	0	12	30	1	30	9	30	0	30	9	0	0	0	0	0	0	0	0	5	0	0	0	0	0	0
	119	0	6	0	30	28	30	28	0	13	30	2	30	10	30	0	30	9	0	0	0	0	0	0	0	0	5	0	0	0	0	0	0
	120	0	6	0	30	27	30	28	0	14	30	3	30	11	30	0	30	10	0	0	0	0	0	0	0	0	5	0	0	0	0	0	0
1	121	0	6	0	30	27	30	28	0	15	30	4	30	12	30	0	30	11	0	0	0	0	0	0	0	0	5	0	0	0	0	0	0
	122	0	6	0	30	27	30	28	0	16	30	5	30	13	30	0	30	12	0	0	0	0	0	0	0	0	4	0	0	0	0	0	0
	123	0	6	0	30	27	30	28	0	17	30	5	30	14	30	0	30	13	0	0	0	0	0	0	0	0	3	0	0	0	0	0	0
	124	0	6	0	30	27	30	28	0	18	30	5	30	15	30	0	30	14	0	0	0	0	0	0	0	0	2	0	0	0	0	0	0
	125	0	6	0	30	27	30	28	0	19	30	5	30	16	30	0	30	15	0	0	0	0	0	0	0	0	1	0	0	0	0	0	0
	126	0	6	0	30	28	30	28	0	20	30	5	30	17	30	0	30	16	0	0	0	0	0	0	0	0	0	0	0	0	0	0	0
	127	0	6	0	30	29	30	28	0	21	30	5	30	18	30	0	30	17	0	0	0	0	0	0	0	0	0	0	0	0	0	0	0
	128	0	6	0	30	29	30	28	0	22	30	5	30	19	30	0	30	18	0	0	0	0	0	0	0	0	0	0	0	0	0	0	0
	129	0	6	0	30	29	30	28	0	22	30	5	30	20	30	0	30	19	0	0	0	0	0	0	0	0	0	0	0	0	0	0	0
	130	0	6	0	30	29	30	29	0	22	30	5	30	20	30	0	30	20	0	0	0	0	0	0	0	0	0	0	0	0	0	0	0
	131	0	6	0	30	29	30	30	0	23	30	5	30	20	30	0	30	21	0	0	0	0	0	0	0	0	0	0	0	0	0	0	0
	132	0	6	0	30	29	30	30	0	24	30	5	30	20	30	0	30	22	0	0	0	0	0	0	0	0	0	0	0	0	0	0	0
	133	0	6	0	30	29	30	30	0	25	30	5	30	20	30	0	30	23	0	0	0	0	0	0	0	0	0	0	0	0	0	0	0
	134	0	6	0	30	29	30	30	0	26	30	5	30	21	30	0	30	24	0	0	0	0	0	0	0	0	0	0	0	0	0	0	0
	135	0	5	0	30	29	30	30	0	27	30	5	30	22	30	0	30	24	0	0	0	0	0	0	0	0	0	0	0	0	0	0	0
	136	0	4	0	30	29	30	30	0	28	30	5	30	23	30	0	30	24	0	0	0	1	0	0	0	0	0	0	0	0	0	0	0
	137	0	3	0	30	29	30	30	0	28	30	5	30	24	30	0	30	24	0	0	0	2	0	0	0	0	0	0	0	0	0	0	0
	138	1	2	0	30	29	30	30	0	28	30	5	30	25	30	0	30	24	0	0	0	3	0	0	0	0	0	0	0	0	0	0	0
	139	2	1	0	30	29	30	30	0	28	30	5	30	26	30	0	30	24	0	0	0	4	0	0	0	0	0	0	0	0	0	0	0
	140	3	0	0	30	29	30	30	0	28	30	5	30	26	30	0	30	24	0	0	0	5	1	0	0	0	0	0	0	0	0	0	0
	141	4	0	0	30	29	30	30	0	28	30	5	30	26	30	0	30	24	0	0	0	6	2	0	0	0	0	0	0	0	0	0	0
	142	5	0	0	30	29	30	30	0	28	30	5	30	26	30	0	30	24	0	0	0	6	3	0	0	0	0	0	0	0	0	0	0
	143	6	0	0	30	28	30	30	0	28	30	5	30	26	30	0	30	24	0	0	0	6	4	0	0	0	0	0	0	0	0	0	0
	144	6	0	0	30	27	30	30	0	28	30	6	30	26	30	0	30	25	0	0	0	6	5	0	0	0	0	0	0	0	0	0	0
	145	6	1	0	30	26	30	30	0	28	30	7	30	26	30	0	30	26	0	0	0	6	6	0	0	0	0	0	0	0	0	0	0
	146	6	2	0	30	26	30	30	0	28	30	8	30	26	29	0	30	27	0	0	0	6	7	0	0	0	0	0	0	0	0	0	0
	147	6	3	0	30	26	30	30	0	28	30	9	30	26	28	0	30	28	0	0	0	6	8	0	0	0	0	0	0	0	0	0	0
	148	6	4	0	30	26	30	30	0	28	30	9	30	26	27	0	30	29	0	0	0	6	9	0	0	0	0	0	0	0	0	0	0
	149	6	5	0	30	26	30	30	0	28	30	9	30	26	26	0	30	30	0	0	0	6	10	0	0	0	0	0	0	0	0	0	0
	150	6	6	0	30	27	30	30	0	28	30	9	30	26	25	0	30	30	0	0	0	6	11	0	0	0	0	0	0	0	0	0	0
1	151	6	7	1	30	27	30	30	0	28	30	9	30	26	24	0	30	30	0	0	0	6	12	0	0	0	0	0	0	0	0	0	0
	152	6	8	2	30	27	30	30	0	28	30	9	30	26	23	0	30	30	0	0	0	6	13	0	0	0	0	0	0	0	0	0	0
	153	6	9	3	30	26	30	30	0	28	30	10	30	26	22	0	30	30	0	0	0	6	14	0	0	0	0	0	0	0	0	0	0
	154	6	10	4	30	25	30	30	0	28	30	10	29	26	22	0	30	30	0	0	1	6	15	0	0	0	0	0	0	0	0	0	0
	155	7	11	5	30	25	30	30	0	28	30	10	28	26	22	0	30	30	0	0	2	6	16	0	0	0	0	0	0	0	0	0	1
	156	8	11	6	30	25	30	30	0	28	30	10	27	26	22	0	30	30	0	0	3	6	17	0	0	0	0	0	0	0	0	0	2
	157	9	11	6	30	25	30	30	0	28	30	10	26	26	22	0	30	30	0	0	4	6	17	0	0	0	0	0	0	0	0	0	3
	158	10	11	6	30	25	30	30	0	27	30	10	26	26	22	0	30	30	0	0	5	6	17	0	0	0	0	0	0	0	0	0	4
	159	11	11	6	29	25	30	30	0	27	30	10	26	26	22	0	30	30	0	0	5	6	17	0	0	0	0	0	0	0	0	0	5
	160	11	11	6	29	25	30	30	0	27	30	10	26	27	22	0	30	30	0	0	5	6	17	0	0	0	0	0	0	0	0	0	6
	161	11	11	6	29	25	30	30	0	26	30	11	26	28	22	0	30	30	0	0	5	6	17	0	0	0	0	0	0	0	0	0	7
	162	11	11	6	29	25	30	30	0	25	30	12	26	29	22	0	30	30	0	0	5	6	17	0	0	0	0	0	0	0	0	0	8
	163	11	11	6	29	25	30	30	0	25	30	13	26	30	22	0	30	30	0	0	5	6	17	0	0	0	0	0	0	0	0	0	8
	164	11	11	6	29	25	30	30	0	25	30	14	26	30	22	0	30	30	0	0	5	6	17	0	0	0	0	0	0	0	0	0	8
	165	11	11	6	29	25	30	30	0	25	30	15	26	30	22	0	30	30	0	0	5	6	17	0	0	0	0	0	0	0	0	0	8
	166	11	11	6	29	25	30	30	0	25	30	16	26	30	22	0	30	30	0	0	6	5	17	0	0	0	0	0	0	0	0	0	8
	167	11	11	6	29	25	30	30	0	25	30	17	26	30	22	0	30	30	0	0	7	4	17	0	0	0	0	0	0	0	0	0	8
	168	10	11	6	29	25	30	30	0	25	30	18	26	30	22	0	30	30	0	0	8	3	17	0	0	0	0	0	0	0	0	0	8
	169	9	12	6	29	25	30	30	0	25	30	19	26	30	22	0	30	30	0	0	9	2	17	0	0	0	0	0	0	0	0	0	8
	170	8	13	6	29	25	30	30	0	25	30	20	26	30	22	0	30	30	0	0	10	1	16	0	0	0	0	0	1	1	0	0	8
	171	7	14	6	28	25	30	30	0	25	30	21	26	30	22	0	30	30	0	0	11	0	15	0	0	0	0	0	2	2	0	0	8
	172	6	15	6	27	25	30	30	0	25	30	22	26	30	22	0	30	30	0	0	12	0	14	0	0	0	0	0	3	3	0	0	8
	173	5	16	6	26	26	30	30	0	25	30	23	26	30	22	0	30	30	0	0	13	0	13	0	0	0	0	0	4	4	0	0	8
	174	5	17	6	25	26	30	30	0	25	30	23	26	30	22	0	30	30	0	0	14	0	12	0	0	0	0	0	5	5	0	0	8
	175	5	16	6	25	26	30	30	0	25	30	23	26	30	22	0	30	30	0	0	15	0	11	0	0	0	0	0	6	6	0	0	8
	176	5	15	6	25	25	30	30	0	25	30	23	26	30	23	0	30	30	0	0	16	0	10	0	0	0	0	0	6	7	0	0	8
	177	5	14	6	25	24	30	30	0	25	30	23	26	30	24	0	30	30	0	0	17	0	9	0	0	0	0	0	6	7	0	0	8
	178	5	13	6	25	23	30	30	0	25	30	23	26	30	25	0	30	30	0	0	18	0	8	0	0	0	0	0	6	7	0	0	8
	179	5	12	6	25	22	30	30	0	25	30	22	26	30	26	0	30	30	0	0	19	0	7	0	0	0	0	0	6	7	0	0	8
	180	5	11	6	24	21	30	30	0	25	30	21	26	30	27	0	30	30	0	0	20	0	6	0	0	0	0	0	6	7	0	0	8
1	181	5	10	5	23	20	30	30	0	25	30	20	26	30	28	0	30	30	0	0	21	0	5	0	0	0	0	0	6	7	0	1	8
	182	5	9	4	22	19	30	30	0	25	30	19	26	30	29	0	30	30	0	0	22	0	4	0	0	0	0	0	6	7	0	2	8
	183	5	8	3	21	19	30	30	0	25	30	18	26	30	30	0	30	30	0	0	23	0	3	0	1	0	0	0	6	7	0	3	8
	184	5	7	2	20	19	30	30	0	25	30	18	27	30	30	0	30	30	0	0	23	0	2	0	2	0	0	0	6	8	0	4	8
	185	4	7	1	20	18	30	30	0	25	30	18	28	30	30	0	30	30	0	0	23	0	1	0	3	0	0	0	6	9	0	5	7
	186	3	8	0	20	17	30	30	0	25	30	18	29	30	30	1	30	30	0	0	23	0	0	0	4	0	0	0	6	10	0	6	6
	187	2	9	0	20	17	30	30	0	25	30	18	30	30	30	2	30	30	0	0	23	0	0	0	5	0	0	0	6	11	0	7	5
	188	1	10	0	20	17	30	30	0	26	30	18	30	30	30	3	30	30	0	0	23	0	0	0	5	0	0	0	6	12	0	8	4
	189	0	11	0	21	17	30	30	0	27	30	19	30	30	30	4	30	30	0	0	24	0	1	0	5	0	0	0	6	13	0	9	3
	190	0	12	0	21	17	30	30	0	28	30	20	30	30	30	5	30	30	0	0	25	0	2	0	5	0	0	0	6	14	0	10	2
	191	0	13	0	21	17	30	30	0	29	30	20	30	30	30	6	30	30	0	0	26	0	3	0	5	0	0	0	6	15	0	10	1
	192	0	14	0	21	17	30	30	0	30	30	20	30	30	30	7	30	30	0	0	27	0	4	0	5	0	0	0	6	16	0	10	0
	193	0	15	0	21	17	30	30	0	30	30	20	30	30	30	8	30	30	0	0	28	0	5	0	5	0	0	0	6	17	0	10	0
	194	0	16	0	21	17	30	30	0	30	30	20	30	30	30	8	30	30	0	0	29	0	6	0	5	0	0	0	6	18	0	10	0
	195	0	17	0	21	17	30	30	0	30	30	20	30	30	30	8	30	30	0	0	30	0	7	0	5	0	0	0	6	19	0	10	0
	196	0	18	0	21	17	30	30	0	30	30	20	30	30	30	8	30	30	0	0	30	0	8	0	5	0	0	0	6	19	0	10	0
	197	1	19	0	21	17	30	30	0	30	30	20	30	30	30	8	30	30	0	0	30	0	8	0	5	0	0	0	6	19	0	10	0
	198	2	20	0	21	17	30	30	0	30	30	20	30	30	30	8	30	30	0	0	30	0	8	0	5	0	0	0	6	19	0	10	0
	199	3	20	0	21	17	30	30	0	30	30	19	30	30	30	8	30	30	0	0	30	0	8	0	5	1	0	0	6	19	0	10	1
	200	4	20	1	21	17	30	30	0	30	30	18	30	30	30	8	30	30	0	0	30	0	8	1	5	2	0	0	5	18	0	10	2
	201	5	20	2	22	17	30	30	0	30	30	17	30	30	30	8	30	30	0	0	30	1	8	2	5	3	0	0	4	17	0	10	3
	202	6	20	3	23	17	30	30	0	30	30	16	30	30	30	8	30	30	0	0	30	2	8	3	5	4	0	0	3	16	0	10	4
	203	7	20	4	24	17	30	30	0	30	30	15	30	30	30	8	30	30	0	0	30	3	8	4	5	5	0	0	2	15	0	10	5
	204	8	19	5	25	18	30	30	0	30	30	14	30	30	30	8	30	30	0	0	30	4	8	5	5	6	0	0	1	14	0	10	6
	205	8	19	6	25	19	30	30	0	30	30	14	30	30	30	8	30	30	0	0	30	5	8	6	5	7	0	0	0	13	0	10	7
	206	8	19	6	25	20	30	30	0	30	30	14	30	30	30	8	30	30	0	0	30	5	8	7	5	8	0	0	0	12	0	10	8
	207	8	19	6	25	21	30	30	0	30	30	14	30	30	30	8	30	30	0	0	30	5	8	8	5	9	0	0	0	12	0	10	9
	208	8	19	6	25	22	30	30	0	30	30	14	30	30	30	8	30	30	0	1	30	5	8	9	5	10	0	0	0	12	0	10	10
	209	8	19	6	25	23	30	30	0	30	30	15	30	30	30	8	30	30	0	2	30	5	8	10	5	10	0	0	0	12	0	10	11
	210	8	19	6	26	24	30	30	0	29	30	16	30	30	30	8	30	30	0	3	30	5	8	10	5	10	0	0	0	12	0	10	12
1	211	8	19	6	27	25	30	30	0	29	30	17	30	30	30	8	30	30	0	4	30	5	8	10	5	10	0	0	0	12	0	9	13
	212	8	19	6	28	26	30	30	0	29	30	18	30	30	30	8	30	30	0	5	30	5	8	10	5	10	0	0	0	12	0	8	14
	213	8	19	6	29	27	30	30	0	29	30	19	30	30	30	8	30	30	0	6	30	5	8	10	4	10	1	0	1	13	0	8	15
	214	9	19	6	30	28	30	30	0	29	30	20	30	30	30	8	30	30	0	7	30	5	9	10	3	10	2	0	2	13	0	8	16
	215	10	18	6	30	29	30	30	0	29	30	21	30	30	30	8	30	30	0	8	30	5	10	10	2	10	3	0	3	13	0	8	17
	216	11	17	6	30	30	30	30	0	29	30	22	30	30	30	7	30	30	0	9	29	5	11	10	1	10	4	0	4	13	0	8	18
	217	12	16	6	30	29	30	30	0	29	30	23	30	30	30	6	30	30	0	10	28	5	12	10	0	10	5	0	5	13	0	8	18
	218	13	15	6	30	29	30	30	0	29	30	24	30	30	30	5	30	30	0	11	27	5	13	10	0	10	6	0	6	13	0	8	18
	219	14	14	6	30	29	30	30	0	29	30	24	30	30	30	4	30	30	0	12	26	5	13	10	0	10	7	0	7	13	0	8	18
	220	14	13	6	30	29	30	30	0	29	30	24	30	30	30	3	30	30	0	13	25	5	13	10	0	10	8	0	8	13	0	8	18
	221	14	13	6	30	29	30	30	0	29	30	24	30	30	30	2	30	30	0	14	24	5	13	10	0	10	9	0	9	13	0	9	18
	222	14	13	6	30	29	30	30	0	29	30	24	30	30	30	1	30	30	0	14	23	5	13	10	0	10	9	0	9	13	0	10	18
	223	14	13	6	30	29	30	30	0	29	30	24	30	30	30	0	30	30	0	14	22	5	13	10	0	10	9	0	9	13	0	11	18
	224	14	13	6	30	28	30	30	0	29	30	24	30	30	30	0	30	30	0	14	21	5	13	10	0	10	9	0	9	13	1	12	18
	225	14	13	6	30	27	30	30	0	29	30	24	30	30	30	0	30	30	0	14	20	5	12	10	0	10	9	0	9	13	2	13	18
	226	14	12	6	30	27	30	30	0	29	30	24	30	30	30	0	30	30	0	14	19	5	11	10	0	10	10	0	9	14	3	13	18
	227	13	11	6	30	27	30	30	0	29	30	24	30	30	30	0	30	30	0	14	19	5	11	10	0	10	11	0	9	15	4	13	18
	228	12	10	6	30	27	30	30	0	29	30	24	30	30	30	0	30	30	0	14	19	5	11	10	0	10	12	0	9	16	5	13	18
	229	11	10	6	30	27	30	30	0	29	30	25	30	30	30	0	30	30	0	14	19	6	11	10	0	9	13	0	9	17	6	13	17
	230	10	10	5	30	27	30	30	0	29	30	26	30	30	30	0	30	30	0	14	19	7	11	9	0	8	14	0	9	18	7	14	16
	231	9	10	4	30	27	30	30	0	29	30	27	30	30	30	0	30	30	0	15	19	7	11	8	0	7	15	0	9	19	7	15	15
	232	8	10	3	30	27	30	30	0	29	30	28	30	30	30	0	30	30	0	16	19	7	11	7	0	6	16	0	9	20	7	16	14
	233	7	10	2	30	27	30	30	0	29	30	29	30	30	30	0	30	30	0	17	19	7	11	6	0	5	17	0	9	21	7	17	13
	234	6	11	1	30	27	30	30	0	29	30	30	30	30	30	0	30	30	0	18	19	7	11	5	0	4	18	0	10	22	7	18	12
	235	6	11	0	30	27	30	30	1	29	30	30	30	30	30	0	30	30	0	19	19	7	11	4	0	3	19	0	11	23	7	19	11
	236	6	11	0	30	27	30	30	2	29	30	30	30	30	30	0	30	30	0	20	19	8	11	3	0	2	20	0	12	24	7	20	10
	237	6	11	0	30	27	30	30	3	29	30	30	30	30	30	0	30	30	0	20	19	9	11	2	0	1	21	0	13	25	7	21	9
	238	6	11	0	30	27	30	30	4	29	30	30	30	30	30	0	30	30	0	19	19	10	11	1	0	0	22	0	14	26	7	22	8
	239	6	11	0	30	27	30	30	5	29	30	30	30	30	30	0	30	30	0	18	18	11	11	0	0	0	23	0	15	27	7	23	7
	240	6	11	0	30	27	30	30	6	30	30	30	30	30	30	0	30	30	0	17	17	12	11	0	0	0	24	0	16	28	7	24	7
1	241	6	11	0	30	27	30	30	7	29	30	30	30	30	30	0	30	30	0	16	16	13	11	0	1	0	25	0	17	29	7	25	7
	242	6	11	0	30	27	30	30	8	28	30	30	30	30	30	0	30	30	0	16	15	14	11	0	2	0	26	0	18	30	7	26	7
	243	6	11	0	30	27	30	30	9	27	30	29	30	30	30	0	30	30	0	16	14	15	11	0	3	1	26	0	18	30	7	26	7
	244	5	11	0	30	27	30	30	10	27	30	28	30	30	30	0	30	30	0	16	13	16	10	0	4	2	26	0	18	30	7	26	7
	245	4	11	0	30	27	30	30	11	27	30	27	30	30	30	0	30	30	0	16	13	17	10	0	5	3	26	0	17	29	7	26	7
	246	3	11	0	30	27	30	30	12	27	30	26	30	30	30	0	30	30	0	16	14	18	10	0	6	4	26	0	16	28	7	26	7
	247	2	11	0	30	28	30	30	13	27	30	25	30	30	30	0	30	30	0	16	15	19	10	0	7	5	26	0	15	27	7	26	8
	248	1	11	0	30	28	30	30	14	27	30	24	30	30	30	0	30	30	0	16	16	20	10	0	8	6	26	0	14	27	7	26	9
	249	0	11	0	30	28	30	30	15	27	30	23	30	30	30	0	30	30	0	16	17	21	10	0	8	6	26	1	13	27	7	26	10
	250	1	11	0	30	28	30	30	16	27	30	22	30	30	30	0	30	30	0	16	18	22	10	0	8	7	26	2	12	27	7	25	11
	251	2	10	0	30	28	30	30	17	27	30	21	30	30	29	0	29	30	0	16	19	23	10	0	8	8	26	3	11	27	7	24	12
	252	3	9	0	30	28	30	30	18	27	30	21	30	30	29	0	29	30	0	17	20	24	10	0	8	9	27	4	11	27	7	23	13
	253	4	9	0	30	28	30	30	19	27	30	21	30	30	29	0	29	30	0	18	21	25	10	0	8	10	28	5	11	27	7	22	14
	254	5	9	0	30	29	30	30	20	27	30	21	30	30	29	0	29	30	0	19	21	26	10	0	8	11	29	6	11	27	6	21	15
	255	5	9	0	30	30	30	30	21	27	30	21	30	30	29	0	29	30	0	20	21	27	11	0	8	12	30	7	11	27	5	20	16
	256	5	10	0	30	30	30	30	22	27	30	21	30	30	29	0	29	30	0	21	21	28	12	0	8	13	30	8	11	27	4	20	17
	257	5	11	0	30	30	30	30	23	27	30	21	30	30	29	0	29	30	0	21	20	29	13	0	8	14	30	9	11	27	3	20	17
	258	5	12	0	30	30	30	30	24	27	30	21	30	30	29	0	29	30	0	21	19	30	14	0	8	15	30	10	11	27	2	20	17
	259	5	12	0	30	30	30	30	25	27	30	21	30	30	29	0	29	30	0	21	19	30	15	0	8	16	30	11	11	27	1	20	17
	260	5	12	0	30	30	30	30	26	27	30	21	30	30	29	0	29	30	0	21	19	30	16	0	8	16	30	12	11	27	0	20	17
	261	5	12	0	30	30	30	30	27	27	30	21	30	30	29	0	29	30	0	21	19	30	17	0	8	16	30	13	11	27	0	20	18
	262	5	12	0	30	30	30	30	28	27	30	20	30	30	29	0	29	30	0	21	19	30	18	0	8	16	30	14	11	27	0	20	19
	263	5	12	0	30	30	30	30	29	27	30	19	30	30	29	1	29	30	0	21	19	30	19	0	8	16	30	15	11	27	0	20	20
	264	5	12	0	30	30	30	30	30	27	30	18	30	30	29	2	29	30	0	21	19	30	20	0	8	16	30	16	10	27	0	20	21
	265	5	13	0	30	30	30	30	29	27	30	17	30	30	29	3	29	30	0	21	19	30	21	0	8	16	30	17	9	27	0	20	22
	266	5	14	0	30	30	30	30	28	27	30	16	30	30	29	4	29	30	0	21	19	30	22	0	8	16	30	18	8	27	0	20	22
	267	5	15	0	30	30	30	30	27	27	30	15	30	30	29	5	29	30	0	21	19	30	23	0	8	16	30	19	7	27	0	20	22
	268	5	16	0	30	30	30	30	26	27	30	14	30	30	29	6	29	30	0	21	19	30	24	0	8	16	30	20	6	27	0	20	22
	269	5	17	0	30	30	30	30	25	27	30	13	30	30	28	6	29	30	0	21	20	30	25	0	8	16	30	20	5	27	0	20	22
	270	5	18	0	30	30	30	30	24	27	30	12	30	30	27	6	29	30	0	21	21	30	26	0	8	17	30	20	4	27	0	19	21
1	271	5	19	0	30	30	30	30	23	28	30	12	30	30	26	6	29	30	0	21	22	30	27	0	7	18	30	20	3	27	0	18	20
	272	5	20	0	30	30	30	30	22	29	30	12	30	30	26	6	29	30	0	21	23	30	28	0	6	19	30	20	2	27	0	18	19
	273	5	21	0	30	30	30	30	21	30	30	13	30	30	26	6	29	30	0	21	24	30	29	0	5	19	30	20	1	27	0	18	18
	274	6	22	0	30	30	30	30	20	30	30	14	30	30	26	6	29	30	0	21	25	30	29	0	4	19	30	20	0	27	0	18	17
	275	7	22	0	30	30	30	30	19	30	30	15	30	30	26	6	29	30	0	21	25	30	28	0	3	18	30	20	0	28	0	18	16
	276	8	23	0	30	30	30	30	19	30	30	16	30	30	26	7	29	30	0	21	25	30	28	0	2	18	30	20	0	29	0	18	15
	277	9	24	1	30	30	30	30	19	30	30	17	30	30	25	8	29	30	0	21	25	30	28	0	1	18	30	20	0	30	0	18	14
	278	10	25	2	30	30	30	30	19	30	30	18	30	30	24	9	29	30	0	21	25	30	28	0	0	18	30	20	0	30	1	18	13
	279	11	26	3	30	30	30	30	19	30	30	19	30	30	24	10	29	30	0	21	25	30	28	0	0	19	30	19	0	30	2	18	12
	280	10	27	4	30	30	30	30	19	30	30	20	30	30	24	11	29	30	0	21	25	30	28	0	0	19	30	18	0	30	3	19	11
	281	9	28	5	30	30	30	30	19	30	30	21	30	30	25	12	30	30	0	21	25	30	28	0	0	19	30	17	0	30	4	20	10
	282	9	29	5	30	30	30	30	19	30	30	21	30	30	25	13	30	30	0	21	25	30	28	0	0	19	30	16	0	30	5	21	9
	283	9	28	5	30	30	30	30	18	30	30	21	30	30	25	14	30	30	0	21	25	30	28	0	0	19	30	15	0	30	5	22	8
	284	9	27	5	30	30	30	30	17	30	30	21	30	30	25	15	30	30	0	21	26	30	28	0	0	19	30	14	0	30	5	23	7
	285	10	26	5	30	30	30	30	16	30	30	21	30	30	25	16	30	30	0	21	27	30	28	0	0	19	30	13	0	30	5	24	6
	286	11	25	5	30	30	30	30	15	30	30	21	30	30	25	17	30	30	0	21	28	30	28	0	0	19	30	12	0	30	5	25	5
	287	12	24	5	30	30	30	30	14	30	30	21	30	30	24	18	30	30	0	22	29	30	28	0	0	19	30	11	0	30	5	26	5
	288	12	23	5	30	30	30	30	13	30	30	21	30	30	24	19	30	30	0	23	30	30	28	0	0	18	30	10	0	30	5	27	5
	289	12	22	5	30	30	30	30	12	30	30	21	30	30	24	20	30	30	0	24	30	30	28	0	0	17	30	9	0	30	5	28	5
	290	12	21	6	30	30	30	30	12	30	30	21	30	30	24	20	30	30	0	25	30	30	28	0	0	17	30	8	0	30	5	28	5
	291	12	20	7	30	29	30	30	12	30	30	21	30	30	24	20	30	30	0	25	30	30	28	0	0	17	30	7	0	30	6	28	4
	292	12	19	8	30	29	30	30	12	30	30	22	30	30	24	20	30	30	0	25	30	30	28	0	0	17	30	7	0	30	7	28	3
	293	12	19	9	30	29	30	30	12	30	30	23	30	30	23	19	30	30	0	25	30	30	28	0	0	17	30	7	1	30	8	28	2
	294	12	19	10	30	29	30	30	12	30	30	24	30	30	23	18	30	30	0	25	30	30	28	0	0	17	30	7	2	30	9	28	2
	295	12	19	11	30	29	30	30	13	30	30	25	30	30	23	17	30	30	0	25	30	30	28	0	0	17	30	7	3	30	10	28	2
	296	13	19	12	30	29	30	30	14	30	30	26	30	30	23	16	29	30	0	25	30	30	28	0	0	17	30	7	4	30	11	28	3
	297	14	19	13	30	29	30	30	15	30	30	27	30	30	23	15	28	30	0	26	30	30	28	0	0	17	30	7	5	30	12	28	4
	298	15	19	14	30	29	30	30	16	30	30	28	30	30	23	14	27	30	0	27	30	30	28	0	0	17	30	7	6	30	13	28	5
	299	16	18	15	30	29	30	30	17	30	30	29	30	30	23	14	26	30	0	28	30	30	28	0	0	17	30	8	7	30	14	28	6
	300	17	17	16	30	29	30	30	18	30	30	30	30	30	24	14	25	30	0	29	30	30	28	0	0	16	30	9	7	30	15	29	7
1	301	18	16	17	30	29	30	30	18	30	30	30	30	30	25	14	24	30	0	30	29	30	28	0	0	16	30	10	7	30	16	30	8
	302	18	15	17	30	29	30	30	18	30	30	30	30	30	25	14	23	30	0	30	28	30	28	0	0	16	30	11	7	30	17	30	9
	303	18	14	17	30	29	30	30	18	30	30	30	30	30	25	14	22	30	0	30	27	30	28	0	0	16	30	12	7	30	18	30	10
	304	17	13	17	30	29	30	30	18	30	30	30	30	30	25	14	21	30	0	30	26	30	29	0	0	16	30	13	7	30	19	30	11
	305	16	13	17	30	29	30	30	18	30	30	30	30	30	25	14	20	30	0	30	25	30	30	0	0	17	30	14	7	30	20	30	12
	306	15	12	17	30	29	30	30	17	30	30	30	30	30	24	14	19	30	0	30	24	30	30	0	0	17	30	15	7	30	21	30	13
	307	14	11	16	30	29	30	30	16	30	30	30	30	30	24	14	18	30	0	30	23	30	30	0	0	17	30	16	7	30	22	30	14
	308	13	10	15	30	29	30	30	15	30	30	30	30	30	24	14	18	30	0	30	22	30	30	0	0	17	30	17	7	30	22	30	15
	309	12	9	14	30	29	30	30	15	30	30	30	30	30	23	14	18	30	0	30	21	30	30	0	0	17	30	18	7	30	22	30	16
	310	12	8	13	30	29	30	30	15	30	30	30	30	30	22	14	18	30	0	30	20	30	30	0	0	17	30	19	7	30	22	30	17
	311	12	7	12	30	29	30	30	15	30	30	30	30	30	21	14	18	30	0	30	19	30	30	0	0	17	30	20	7	30	22	30	18
	312	11	6	12	30	29	30	30	15	30	30	30	30	30	20	14	18	30	0	30	18	30	30	0	0	17	30	21	7	30	22	30	19
	313	10	6	12	30	29	30	30	16	30	30	30	30	30	19	14	18	30	0	30	17	30	30	0	0	17	30	22	8	30	23	30	20
	314	9	6	12	30	29	30	30	17	30	30	30	30	30	18	14	18	30	0	30	16	30	30	0	0	17	30	23	9	30	24	30	21
	315	8	7	12	30	28	30	30	18	30	30	30	30	30	17	14	17	30	0	30	15	30	30	0	0	17	30	24	10	30	25	30	22
	316	7	8	12	30	27	30	30	19	30	30	30	30	30	16	14	16	30	0	30	14	30	30	0	0	17	30	25	11	30	26	30	23
	317	6	9	12	30	26	30	30	20	30	30	30	30	30	17	14	15	30	0	30	13	30	30	0	0	17	30	26	12	30	27	30	24
	318	6	10	12	30	25	30	30	21	30	30	30	30	30	17	13	14	30	0	30	12	30	30	0	0	18	30	27	12	30	28	30	25
	319	7	11	12	30	24	30	30	22	30	30	30	30	30	17	12	13	30	0	30	11	30	30	0	0	19	30	28	12	30	29	30	26
	320	8	11	11	30	23	30	30	22	30	30	30	30	30	17	12	12	30	1	30	10	30	30	0	0	20	30	29	12	30	30	30	27
	321	9	12	10	30	23	30	30	22	30	30	30	30	30	17	12	11	30	2	30	9	30	30	0	0	20	30	30	12	30	30	30	28
	322	10	13	9	30	22	30	30	22	30	30	30	30	30	17	12	10	30	3	30	8	30	30	0	1	20	30	30	12	30	30	30	29
	323	11	13	8	30	21	30	30	22	30	30	30	30	30	18	12	9	30	4	30	7	30	30	0	2	20	29	29	11	30	30	30	29
	324	11	13	7	30	20	30	30	22	30	30	30	30	30	17	12	8	30	5	30	6	30	30	0	3	21	28	29	10	30	30	30	28
	325	11	13	6	30	19	30	30	22	30	30	30	30	30	16	12	7	29	6	30	5	30	30	0	4	22	27	29	9	30	30	30	27
	326	10	13	5	30	18	30	30	22	30	30	30	30	30	15	12	7	28	7	30	4	30	30	0	5	23	26	29	8	30	30	30	26
	327	9	12	4	30	17	30	30	22	30	30	30	30	30	14	12	7	27	8	30	3	30	30	0	6	24	26	29	7	30	30	30	25
	328	8	11	3	30	17	30	30	22	30	30	30	30	30	13	12	7	27	9	30	2	30	30	0	7	25	26	29	6	30	30	30	24
	329	8	11	2	30	17	30	30	22	30	30	30	30	30	14	12	8	27	10	30	1	29	30	0	7	26	26	29	5	30	30	30	23
	330	8	11	1	30	17	30	30	22	30	30	30	30	30	14	12	9	27	10	30	0	28	30	0	7	27	26	29	5	30	30	30	22
1	331	8	11	0	30	17	30	30	23	29	30	30	30	30	14	12	10	27	10	30	0	28	30	0	7	27	26	29	5	30	30	30	21
	332	9	11	0	30	17	30	30	24	28	30	30	30	30	14	12	11	27	10	30	1	28	30	0	7	27	26	29	5	30	30	30	20
	333	10	11	0	30	17	30	30	25	28	30	30	30	30	14	12	12	27	10	30	2	28	30	0	7	27	26	29	5	30	30	30	19
	334	10	11	0	30	17	30	30	26	28	30	30	30	30	14	12	13	26	10	30	3	28	30	0	7	27	26	29	5	30	30	30	18
	335	10	11	0	30	17	30	30	27	28	30	30	30	30	14	12	14	25	10	30	4	28	30	0	7	27	26	29	5	30	30	30	17
	336	10	11	0	30	17	30	30	28	28	30	30	30	30	15	11	15	24	10	30	5	28	30	0	7	27	26	29	5	30	30	30	16
	337	10	11	0	30	17	30	30	29	28	30	30	30	30	16	10	16	24	10	30	6	28	30	0	7	26	26	29	5	30	30	30	15
	338	10	11	0	30	16	30	30	30	27	30	30	29	30	17	9	16	24	10	30	6	28	30	0	7	25	26	29	5	30	30	30	14
	339	10	11	0	30	15	30	30	30	27	30	30	29	30	18	8	16	24	10	30	6	28	30	0	7	24	26	29	5	30	30	30	13
	340	10	11	1	30	14	30	30	30	27	30	30	29	30	19	7	16	24	10	30	6	28	30	0	7	23	26	29	5	30	30	30	13
	341	10	11	2	30	13	30	30	30	27	30	30	29	30	20	6	16	24	10	30	7	28	30	0	7	22	26	29	5	30	30	30	13
	342	10	12	3	30	12	30	30	30	27	30	30	29	30	21	5	16	24	10	30	8	28	30	0	7	21	25	29	5	30	30	30	13
	343	10	13	4	30	11	30	30	30	27	30	30	29	30	22	4	16	24	10	30	9	28	30	0	7	20	24	29	4	30	30	30	13
	344	10	14	5	30	10	30	30	30	27	30	30	29	30	23	3	15	24	10	30	10	28	30	0	7	19	23	29	3	30	30	30	13
	345	10	14	6	30	10	30	30	30	27	30	30	29	30	23	2	15	24	10	30	11	28	30	0	7	18	22	29	2	30	30	30	13
	346	10	14	7	30	10	30	30	30	26	30	30	29	30	23	1	15	24	10	30	12	28	30	0	7	17	21	29	1	30	30	30	13
	347	10	14	7	30	10	30	30	30	25	30	30	29	30	23	0	15	24	10	30	13	28	30	0	7	16	20	29	0	30	30	30	13
	348	10	14	7	30	10	30	30	30	24	30	30	29	30	23	0	16	24	10	30	14	28	30	0	7	15	19	29	0	30	30	30	13
	349	9	14	7	30	10	30	30	29	23	30	30	29	30	23	0	17	24	10	30	15	28	30	0	7	14	18	29	0	30	30	30	13
	350	8	15	7	30	10	30	30	28	22	30	30	29	30	23	0	18	24	9	30	16	28	30	0	7	13	17	29	0	30	30	30	12
	351	7	15	7	30	10	30	30	27	21	30	30	29	30	23	0	19	24	8	30	17	28	30	0	7	13	16	29	0	30	30	30	11
	352	6	15	7	30	10	30	30	26	21	30	30	29	30	23	1	20	24	7	30	18	28	30	0	6	13	15	29	0	30	30	30	10
	353	5	15	8	30	10	30	30	25	21	30	30	29	30	23	2	21	24	6	30	19	28	30	0	5	13	15	30	0	30	30	30	10
	354	5	15	9	30	10	30	30	24	21	30	30	29	30	24	3	22	24	5	30	20	27	30	0	4	12	16	30	0	30	30	30	10
	355	5	15	10	30	10	30	30	23	21	30	30	29	30	25	4	23	25	5	30	21	26	30	0	3	11	17	30	1	30	30	30	10
	356	5	15	11	30	10	30	30	22	21	30	30	29	30	26	5	24	26	5	30	22	25	30	0	2	10	18	30	2	30	30	30	10
	357	5	16	12	30	10	30	30	21	21	30	30	29	30	27	6	25	27	5	30	23	24	30	0	1	9	18	30	3	30	30	30	10
	358	5	17	13	30	9	30	30	20	21	30	30	29	30	28	7	26	27	5	30	24	23	30	0	0	8	18	30	4	30	30	30	10
	359	4	18	14	30	8	30	30	19	21	30	30	29	30	28	7	25	27	5	30	25	23	30	0	0	7	18	30	5	30	30	30	10
	360	3	19	14	30	7	30	30	18	21	30	30	29	30	27	7	24	27	6	30	26	23	30	0	0	6	18	30	6	30	30	30	10
1	361	2	20	14	30	6	30	30	17	22	30	30	29	30	27	7	23	27	7	30	27	22	30	0	0	5	18	30	6	30	30	30	10
	362	1	20	15	30	5	30	30	16	23	30	30	29	30	27	7	22	27	7	30	27	21	30	0	0	4	18	30	6	30	30	30	10
	363	0	20	16	30	5	30	30	15	23	30	30	29	30	27	7	22	27	7	30	27	20	30	0	0	3	18	30	6	30	30	30	10
	364	0	20	17	30	5	30	30	14	23	30	30	29	30	27	7	22	28	7	30	27	19	30	0	0	2	18	30	6	30	30	30	10
	365	0	20	18	30	5	30	30	13	23	30	30	29	30	27	7	22	29	7	30	27	19	30	0	1	1	18	30	6	30	30	30	10
	366	0	20	19	30	5	30	30	12	23	30	30	29	30	27	7	22	30	7	30	27	19	30	0	2	0	18	30	6	30	30	30	10
	367	0	20	19	30	5	30	30	11	23	30	30	28	30	27	8	22	30	7	30	27	19	30	0	3	0	18	30	6	30	30	30	10
	368	0	21	19	30	5	30	30	10	24	30	30	29	30	27	9	22	30	7	30	28	19	30	0	4	0	18	30	6	30	30	30	10
	369	0	22	19	30	5	30	30	9	24	30	30	29	30	27	10	22	30	7	30	29	19	30	0	5	0	18	30	6	30	30	30	11
	370	0	23	18	29	5	30	30	8	24	30	30	29	30	27	11	22	30	7	30	30	19	30	0	6	0	18	30	6	30	30	30	11
	371	1	24	17	29	5	30	30	7	24	30	30	29	30	27	12	22	30	7	30	30	19	30	0	7	0	18	30	6	30	30	30	11
	372	2	24	16	29	5	30	30	6	24	30	30	29	30	27	13	22	30	7	30	30	19	30	0	8	0	19	30	6	30	30	30	11
	373	3	23	15	29	5	30	30	5	24	30	30	29	30	27	14	22	30	7	30	30	19	30	0	9	0	20	30	6	30	30	30	11
	374	4	22	14	29	6	30	30	4	24	30	30	29	30	27	14	23	30	7	30	30	19	30	0	10	0	20	30	6	30	30	30	10
	375	5	21	13	29	7	30	30	3	24	30	30	29	30	28	14	24	30	7	30	30	19	30	0	11	0	20	29	6	30	30	30	10
	376	6	21	12	29	8	30	30	2	25	30	30	29	30	29	15	25	30	7	30	29	19	30	0	11	0	20	29	6	30	30	30	10
	377	7	21	12	29	9	30	30	1	26	30	30	29	30	29	16	26	30	7	30	29	19	30	0	11	0	20	29	6	30	30	30	10
	378	8	21	12	29	10	30	30	0	27	30	30	29	30	29	17	26	30	7	30	29	19	30	0	11	0	20	29	6	30	30	30	10
	379	9	21	13	29	11	30	30	0	28	30	30	29	30	28	18	26	30	7	30	29	19	30	0	11	0	20	29	6	30	30	30	10
	380	10	21	14	29	12	30	30	0	29	30	30	29	30	27	19	26	30	7	30	29	19	30	0	11	0	20	29	6	30	30	30	11
	381	11	21	15	29	13	30	30	0	30	30	30	29	30	26	20	26	30	7	30	29	19	30	0	11	0	20	29	6	30	30	30	12
	382	12	21	16	29	14	30	30	0	30	30	30	29	30	25	20	26	30	7	30	29	19	30	0	11	0	20	29	6	30	30	30	13
	383	13	21	16	29	15	30	30	0	30	30	30	29	30	24	20	26	30	7	30	29	19	30	0	11	1	21	29	6	30	30	30	14
	384	14	21	16	29	16	30	30	0	30	30	30	29	30	24	20	25	30	7	30	29	20	30	0	11	2	21	29	6	30	30	30	15
	385	15	21	16	29	17	30	30	0	30	30	30	29	30	24	20	24	30	6	30	29	21	30	0	11	3	21	29	5	30	30	30	16
	386	16	21	16	29	18	30	30	0	30	30	30	29	30	24	20	23	30	5	30	29	22	30	0	11	4	21	29	4	30	30	30	17
	387	17	21	15	29	19	30	30	0	30	30	30	29	30	24	20	22	30	4	30	29	23	30	0	11	5	21	29	3	30	30	30	18
	388	18	21	14	29	20	30	30	0	30	30	30	29	30	24	20	21	30	3	30	29	24	30	0	11	6	21	29	2	30	30	30	19
	389	18	21	13	29	21	30	30	0	30	30	30	29	30	24	21	21	30	2	29	29	25	30	0	11	7	21	29	1	30	30	30	20
	390	18	21	13	29	22	30	30	0	30	30	30	29	30	24	22	21	30	1	29	29	26	30	0	11	7	21	29	0	30	30	30	21
1	391	18	21	13	29	23	30	30	0	30	30	30	29	30	24	23	21	30	0	29	29	27	30	0	11	7	21	29	0	30	30	29	22
	392	18	22	12	29	24	30	30	0	30	30	30	29	30	24	24	21	30	0	29	29	28	30	0	11	7	21	29	0	30	30	29	23
	393	18	23	11	29	24	30	30	0	30	30	30	29	30	24	24	20	30	0	29	29	29	30	0	11	7	21	29	0	30	30	29	24
	394	18	24	10	29	24	30	30	0	30	30	30	29	30	24	24	19	30	0	29	29	30	30	0	11	7	21	29	0	30	30	29	25
	395	18	25	9	29	24	30	30	0	30	30	30	29	30	24	24	18	30	0	29	29	30	30	0	10	7	21	29	0	30	30	29	26
	396	18	26	8	29	24	30	30	0	30	30	30	29	30	24	25	18	30	0	28	29	30	30	0	9	7	21	29	0	30	30	29	27
	397	18	27	8	29	24	30	30	0	30	30	30	30	30	24	25	18	30	0	28	28	30	30	0	9	7	20	29	0	30	30	29	28
	398	18	27	8	29	25	30	30	0	30	30	30	30	30	24	25	18	30	0	28	27	30	30	0	9	7	19	29	0	30	30	29	29
	399	18	27	8	29	26	30	30	0	30	30	30	30	30	23	25	18	30	0	28	26	30	30	0	9	7	18	29	0	30	30	29	29
	400	18	27	8	30	27	30	30	0	30	30	30	30	30	23	25	18	29	0	28	26	30	30	0	9	7	17	29	0	30	30	28	29
	401	17	27	8	30	28	30	30	0	30	30	30	30	30	23	25	18	28	0	28	26	30	30	0	9	7	16	29	0	30	30	27	29
	402	16	27	8	30	29	30	30	1	30	30	30	30	30	23	25	18	27	0	27	26	30	30	0	9	7	15	29	0	30	30	26	29
	403	15	28	8	30	30	30	30	2	30	30	30	30	30	23	24	18	26	0	26	26	30	30	0	9	7	14	29	0	30	30	25	29
	404	14	29	8	30	30	30	30	3	30	30	30	30	30	23	25	18	26	0	25	26	30	30	0	8	7	14	29	0	30	30	24	30
	405	13	30	8	30	30	30	30	4	30	30	30	30	30	23	26	18	26	0	24	25	30	30	0	7	7	14	30	0	30	30	23	30
	406	12	30	8	30	30	30	30	5	30	30	29	30	30	23	26	17	26	0	23	25	30	30	0	7	7	14	30	0	30	30	22	30
	407	11	30	8	30	30	30	30	6	30	30	28	30	30	23	26	16	26	0	22	24	30	30	0	7	7	14	30	0	30	30	21	30
	408	10	30	8	30	30	30	30	7	30	30	28	30	30	23	26	15	26	0	21	23	30	30	0	7	7	14	30	0	30	30	20	30
	409	9	30	7	30	30	30	30	8	30	30	28	30	30	24	26	14	26	0	20	22	30	30	0	7	7	14	30	0	30	30	19	30
	410	8	30	6	30	30	30	30	9	30	30	28	30	30	25	26	14	26	0	19	21	30	30	0	7	7	14	30	0	30	30	18	30
	411	7	30	5	30	30	30	30	10	30	30	28	30	30	26	26	14	26	0	18	20	30	30	0	8	7	14	30	0	30	30	17	29
	412	6	30	4	30	30	30	30	11	30	30	28	30	30	27	25	14	26	0	17	19	30	30	1	9	7	14	30	0	30	30	16	28
	413	5	30	3	30	30	30	30	12	30	30	28	30	30	28	24	14	26	0	16	18	30	30	2	10	7	13	30	0	30	30	15	27
	414	4	30	2	30	30	30	30	13	30	30	27	30	30	27	23	15	26	1	15	17	30	30	3	11	7	13	30	0	30	30	14	26
	415	3	30	2	30	30	30	30	14	30	30	27	30	30	26	23	15	26	2	14	16	30	30	4	12	7	13	30	0	30	30	13	25
	416	2	30	2	30	30	30	30	15	30	30	27	30	30	25	23	16	26	3	13	15	30	30	5	13	7	13	30	0	30	30	12	24
	417	2	30	3	30	30	30	30	16	30	30	27	30	30	25	23	17	26	4	12	14	30	30	6	14	7	13	30	0	30	30	11	23
	418	2	30	4	30	30	30	30	17	30	30	27	30	30	25	23	18	26	5	11	13	30	30	7	15	7	13	30	0	30	30	10	22
	419	3	30	5	30	30	30	30	18	30	30	27	30	30	25	23	19	26	6	11	12	30	30	8	16	7	13	30	0	30	30	9	21
	420	4	30	6	30	30	30	30	19	30	30	27	30	30	26	23	20	26	7	10	11	30	30	8	17	8	13	30	0	30	30	8	20
1	421	5	30	7	30	30	30	30	20	30	30	27	30	30	26	23	20	26	8	9	10	30	30	8	18	8	12	30	0	30	30	8	19
	422	5	30	7	30	30	30	30	21	30	30	27	30	30	26	22	20	26	8	8	9	30	30	8	19	8	11	30	0	30	30	7	18
	423	5	30	7	30	30	30	30	22	30	30	26	30	30	26	22	20	26	8	7	8	30	30	8	20	8	10	30	0	30	30	6	17
	424	5	30	7	30	30	30	30	23	30	30	25	30	30	26	22	20	26	8	6	7	30	30	8	20	8	9	30	0	30	30	5	16
	425	5	30	7	30	30	30	30	24	30	30	24	30	30	26	22	20	26	8	5	6	30	30	8	20	8	8	30	0	30	30	4	15
	426	5	30	7	30	30	30	30	25	30	30	23	30	30	26	21	19	26	8	5	5	30	30	8	20	8	7	30	0	30	30	3	14
	427	5	30	7	30	30	30	30	26	30	30	23	30	30	26	20	19	26	8	4	5	30	30	8	20	8	7	30	0	30	30	2	13
	428	5	30	7	30	30	30	30	27	30	30	23	30	30	26	19	19	26	8	3	6	30	30	8	20	8	7	30	0	30	30	2	12
	429	5	30	7	30	30	30	30	28	30	30	23	30	30	26	19	19	26	8	2	7	30	30	8	20	8	7	30	0	30	30	2	11
	430	5	30	8	30	30	30	30	29	30	30	23	30	30	25	19	19	27	8	1	7	30	30	8	20	8	7	30	0	30	30	3	10
	431	5	30	9	30	30	30	30	30	30	30	23	30	30	25	19	19	28	8	0	7	30	30	8	20	8	7	30	0	30	30	4	9
	432	5	30	10	30	30	30	30	30	30	30	23	30	30	25	19	19	29	8	0	7	30	30	8	20	8	7	30	0	30	30	5	8
	433	5	30	11	30	30	30	30	30	30	30	23	30	30	25	20	18	30	8	1	7	30	30	8	20	8	7	30	0	30	30	6	7
	434	5	30	12	30	30	30	30	30	30	30	23	30	30	25	20	18	30	8	2	7	30	30	8	21	8	7	30	0	30	30	6	6
	435	5	30	13	30	30	30	30	30	30	30	23	30	30	25	19	18	30	8	3	8	30	30	8	22	8	7	30	0	30	30	6	5
	436	5	30	14	30	30	30	30	30	30	30	24	30	30	25	18	19	30	8	4	9	30	30	8	23	8	7	30	0	29	30	6	4
	437	5	30	15	30	30	30	30	30	30	30	25	30	30	25	17	20	30	8	5	10	30	30	8	24	8	7	30	0	29	30	6	3
	438	5	30	16	30	30	30	30	30	29	30	25	30	30	25	16	21	30	8	5	11	30	30	8	25	8	7	30	0	29	30	6	2
	439	5	30	16	30	30	30	30	30	29	30	25	30	30	25	15	22	30	8	5	12	30	30	8	26	8	7	30	0	29	30	6	1
	440	5	30	16	30	30	30	30	30	29	30	25	30	30	25	14	21	30	8	6	13	30	30	8	27	8	7	30	0	29	30	6	1
	441	5	30	16	30	30	30	30	30	29	30	25	30	30	25	13	21	30	8	7	14	30	30	8	27	8	7	30	0	29	30	6	2
	442	5	30	16	30	30	30	30	30	29	30	25	30	30	25	13	21	30	8	8	15	30	30	7	27	8	7	30	0	29	30	6	3
	443	5	30	16	30	30	30	30	29	29	30	25	30	30	25	14	21	30	8	9	16	30	30	6	27	7	7	30	0	29	30	6	4
	444	5	30	16	30	30	30	30	28	29	30	26	30	30	26	15	21	30	7	10	17	30	30	5	27	6	6	30	0	29	30	6	5
	445	5	30	15	30	30	30	30	27	29	30	26	30	30	27	15	22	30	7	11	18	30	30	4	27	5	5	30	0	29	30	6	5
	446	5	30	14	30	30	30	30	26	29	30	26	30	30	28	15	22	30	7	12	19	30	30	3	27	5	4	30	0	29	30	6	5
	447	4	30	13	30	30	30	30	25	29	30	26	30	30	28	15	22	30	7	13	20	30	30	2	27	5	3	30	0	29	30	6	5
	448	3	30	12	30	30	30	30	24	29	30	26	30	30	28	15	22	30	7	14	21	30	30	1	27	5	2	30	0	29	30	6	5
	449	2	30	11	30	30	30	30	23	29	30	25	30	30	28	15	22	30	7	15	22	30	30	0	27	5	1	30	0	29	30	6	5
	450	1	30	10	30	30	30	30	22	29	30	24	30	30	28	15	22	30	7	16	23	30	30	0	27	5	0	30	0	28	30	6	5
1	451	0	30	9	30	30	30	30	21	28	30	23	30	30	27	15	23	30	6	17	24	30	30	0	27	5	0	30	0	27	29	6	5
	452	0	30	9	30	30	30	30	20	27	30	22	30	30	26	16	23	30	6	18	25	30	30	0	27	5	0	30	0	26	28	6	5
	453	0	30	9	30	30	30	30	19	26	30	22	30	30	25	16	24	30	6	19	26	30	30	0	27	5	0	30	0	25	27	6	5
	454	0	30	9	30	30	30	30	18	25	30	22	30	30	24	16	25	30	6	20	27	30	30	0	28	5	0	30	0	24	26	6	5
	455	0	30	9	30	30	30	30	17	24	30	22	30	30	23	16	26	30	6	21	28	30	30	0	29	5	0	30	0	23	25	6	5
	456	0	30	9	30	30	30	30	16	24	30	23	30	30	22	16	27	30	6	22	29	30	30	0	30	5	0	30	0	22	24	6	5
	457	0	30	9	30	30	30	30	15	24	30	23	30	30	21	16	27	30	6	23	30	30	30	0	30	5	0	30	0	21	24	6	5
	458	0	30	9	30	30	30	30	14	24	30	23	30	30	20	16	27	30	6	23	30	30	30	0	30	5	0	30	0	21	24	5	5
	459	0	30	9	30	30	30	30	13	24	30	23	30	30	20	15	27	30	6	23	29	30	30	0	30	5	0	30	0	21	24	4	5
	460	1	30	8	30	30	30	30	12	24	30	23	29	30	20	14	26	30	6	23	28	30	30	0	30	5	0	30	0	21	24	3	5
	461	2	30	7	30	30	30	30	12	24	30	23	29	30	19	13	25	30	6	24	27	30	30	0	30	5	0	30	0	21	24	2	5
	462	3	30	7	30	30	30	30	12	24	30	23	29	30	18	12	24	30	6	25	26	30	30	0	30	5	0	30	0	21	24	1	5
	463	4	30	7	30	30	30	30	12	24	30	23	29	30	17	11	25	30	6	25	25	30	30	0	30	5	0	30	0	20	24	0	5
	464	5	30	7	30	30	30	30	12	24	30	23	29	30	16	10	25	30	6	25	24	30	30	0	30	5	0	30	0	19	24	0	5
	465	6	30	7	30	30	30	30	12	24	30	23	29	30	15	10	25	30	6	25	23	30	30	0	30	5	0	30	0	18	24	0	5
	466	7	30	7	30	30	30	30	12	23	30	23	29	30	14	10	25	30	6	25	22	30	30	0	30	5	0	30	0	18	24	0	5
	467	8	30	7	30	30	30	30	12	23	30	23	29	30	13	10	25	30	6	24	21	30	30	0	30	5	0	30	0	17	24	0	5
	468	9	30	6	30	30	30	30	12	24	30	23	29	30	12	10	25	30	6	24	20	30	30	0	30	5	0	30	0	16	24	0	5
	469	10	30	6	30	30	30	30	12	24	30	23	29	30	11	10	25	30	6	24	19	30	30	0	30	5	0	30	0	15	24	0	5
	470	11	29	6	30	30	30	30	12	24	30	23	29	30	10	10	26	30	6	24	18	30	30	0	30	5	0	30	0	14	24	0	4
	471	12	28	6	30	30	30	30	12	24	30	23	29	30	9	10	25	30	6	24	18	30	30	0	30	5	0	30	0	13	24	0	3
	472	13	27	6	30	30	30	30	12	24	30	23	29	30	8	11	25	30	7	24	18	30	30	0	29	5	0	30	0	12	24	0	2
	473	14	26	6	30	30	30	30	13	24	30	23	29	30	7	11	25	30	8	24	18	30	30	0	28	5	0	30	0	11	24	0	1
	474	15	25	6	30	30	30	30	14	24	30	23	29	30	6	11	25	30	9	24	18	30	30	0	27	5	0	30	0	11	24	0	0
	475	16	24	6	30	30	30	30	15	24	30	23	29	30	5	11	25	30	9	24	18	30	30	0	26	5	0	30	0	11	24	0	0
	476	17	23	7	30	30	30	30	15	24	30	23	28	30	4	11	25	30	9	24	18	30	30	0	25	4	1	30	0	11	24	0	0
	477	18	22	8	30	30	30	30	15	24	30	23	28	30	3	10	25	30	9	24	18	30	30	0	24	3	2	30	0	11	24	0	0
	478	19	21	9	30	30	30	30	15	24	30	23	28	30	2	9	25	30	9	24	18	30	30	0	23	2	3	30	0	11	24	0	0
	479	20	20	10	30	30	30	30	15	24	30	23	28	30	1	8	25	30	9	24	18	30	30	0	22	1	4	30	0	11	24	0	0
	480	21	19	11	30	30	30	30	15	24	30	23	28	30	0	7	25	30	9	24	18	30	30	0	21	0	5	30	0	12	24	0	0
1	481	22	18	12	30	30	30	30	15	25	30	23	28	30	0	6	25	30	10	23	18	30	30	0	20	0	6	30	0	13	25	0	0
	482	23	17	12	30	30	30	30	15	26	30	23	28	30	0	5	26	30	11	22	18	30	30	0	19	0	7	30	0	14	26	0	0
	483	24	16	12	30	30	30	30	15	27	30	23	28	30	1	5	26	30	12	21	18	30	30	0	18	0	8	30	0	15	27	0	0
	484	25	15	12	30	30	30	30	15	28	30	23	28	30	2	5	26	30	13	20	18	30	30	0	17	0	9	30	0	16	28	0	0
	485	26	14	12	30	30	30	30	15	29	30	23	28	30	3	5	26	30	14	19	18	30	30	0	16	0	10	30	0	17	29	0	0
	486	27	13	13	30	30	30	30	15	29	30	22	28	30	4	5	26	30	14	18	18	30	30	0	15	0	11	30	0	18	30	0	0
	487	28	12	14	30	30	30	30	15	29	30	21	28	30	5	5	26	30	14	17	18	30	30	0	14	0	12	30	0	19	30	0	0
	488	29	11	15	30	30	30	30	15	29	30	20	28	30	6	5	26	30	14	17	18	30	30	0	13	0	13	30	0	19	30	0	0
	489	30	10	16	30	30	30	30	15	29	30	19	28	30	7	6	26	30	14	17	19	30	30	0	12	0	14	30	0	19	30	0	1
	490	30	9	17	30	30	30	30	15	29	30	18	29	30	8	7	27	30	14	17	20	30	29	0	11	0	15	30	0	19	30	0	2
	491	30	8	18	30	30	30	30	14	29	30	18	28	30	9	8	28	30	14	16	21	30	28	0	10	0	16	30	0	19	30	0	3
	492	30	7	18	30	30	30	30	13	29	30	18	28	30	10	9	29	30	14	15	22	30	28	0	9	0	17	30	0	19	30	0	4
	493	30	6	18	30	30	30	30	12	29	30	18	28	30	11	10	29	30	14	14	23	30	28	0	9	0	18	30	0	19	30	0	5
	494	30	5	18	30	30	30	30	11	29	30	18	28	30	12	10	29	30	14	13	24	30	28	0	9	0	19	30	0	19	30	0	6
	495	30	4	17	30	30	30	30	10	29	30	18	28	30	13	10	29	30	14	12	25	30	28	0	9	0	20	30	0	19	30	0	7
	496	30	3	16	30	30	30	30	9	30	30	18	28	30	14	10	29	30	14	11	26	30	28	0	9	0	21	30	0	19	30	0	8
	497	29	2	15	30	30	30	30	8	30	30	18	28	30	15	10	29	30	14	11	27	30	28	0	9	0	22	30	0	19	30	0	9
	498	28	1	15	30	30	30	30	7	30	30	17	28	30	16	10	29	30	14	11	27	29	28	0	9	0	23	30	0	19	30	0	10
	499	27	1	15	30	30	30	30	6	30	30	16	28	30	17	10	29	30	14	11	27	28	28	0	9	0	24	30	0	19	30	0	10
	500	26	2	15	30	30	30	30	5	30	30	16	28	30	18	10	29	30	14	10	27	27	28	0	9	0	25	30	0	19	30	0	10
	501	25	3	15	30	30	30	30	4	30	30	16	28	30	19	10	30	30	14	9	26	26	28	0	9	0	26	30	0	19	30	0	10
	502	24	4	15	30	30	30	30	3	29	30	16	28	30	20	9	30	30	13	8	25	25	28	0	10	0	27	30	0	19	30	0	10
	503	23	5	15	30	30	30	30	2	29	30	16	28	30	21	8	30	30	12	7	24	24	28	0	11	0	28	30	0	19	30	0	10
	504	23	6	15	30	30	30	30	1	29	30	16	28	30	22	7	30	30	11	6	23	23	28	0	12	0	29	30	0	18	30	0	10
	505	23	7	15	30	30	30	30	0	29	30	16	27	30	23	6	30	30	10	5	22	22	28	0	13	0	30	30	0	18	30	0	10
	506	23	8	14	30	30	30	30	0	29	30	16	27	30	24	5	30	30	9	4	21	21	28	0	14	0	30	30	1	18	30	0	11
	507	23	9	13	30	30	30	30	0	29	30	16	27	30	25	6	30	30	8	3	20	20	28	0	15	0	30	30	2	18	30	0	12
	508	23	10	12	30	30	30	30	0	29	30	16	27	30	26	7	30	30	7	2	19	19	28	0	16	0	30	30	3	18	30	0	13
	509	23	11	11	30	30	30	30	0	29	30	17	27	30	27	8	30	30	6	1	18	18	28	0	17	0	30	30	4	18	30	0	14
	510	23	12	10	30	30	30	30	0	29	30	18	27	30	28	9	30	30	5	0	17	17	28	0	18	0	30	30	5	18	30	0	15
1	511	23	13	9	30	30	30	30	0	29	30	19	27	30	29	10	30	30	4	0	16	16	28	0	19	0	30	30	6	18	30	0	16
	512	23	14	9	30	30	30	30	0	29	30	20	27	30	29	10	30	30	3	0	15	15	28	0	20	0	30	30	6	18	30	0	17
	513	22	15	9	30	30	30	30	0	29	30	21	26	30	28	10	30	30	2	0	14	14	28	0	20	0	30	30	6	18	30	0	18
	514	21	16	9	30	30	30	30	0	29	30	22	25	30	27	10	30	30	1	0	13	13	28	0	20	0	30	30	6	18	30	0	19
	515	20	17	9	30	30	30	30	0	28	30	23	24	30	26	10	30	30	0	0	13	12	28	0	20	0	30	30	6	18	30	0	20
	516	19	18	8	30	30	30	30	0	27	30	24	23	30	25	10	30	30	0	0	13	11	28	0	20	0	30	30	6	18	30	0	20
	517	18	19	7	30	30	30	30	0	26	30	25	22	30	24	10	30	30	0	0	13	10	28	0	20	0	30	30	6	18	30	0	20
	518	17	20	6	30	30	30	30	0	25	30	26	21	30	23	10	30	30	0	0	13	9	28	0	20	0	30	30	6	18	30	0	20
	519	16	21	5	30	30	30	30	0	24	30	27	21	30	22	9	30	30	1	0	13	8	28	0	20	0	30	30	6	18	30	0	19
	520	15	22	4	30	30	30	30	0	23	30	28	21	30	21	8	30	30	2	0	13	8	29	0	20	0	30	30	6	18	30	1	18
	521	15	23	3	30	30	30	30	0	22	30	28	22	30	20	7	30	30	3	0	13	8	30	0	20	0	30	30	6	18	30	2	17
	522	15	24	3	30	30	30	30	0	22	30	28	22	30	20	6	30	30	4	0	13	8	30	0	20	0	30	30	6	18	30	3	16
	523	15	25	3	30	30	30	30	0	22	30	28	22	30	20	5	30	30	5	0	13	8	30	0	19	0	30	30	6	18	30	4	15
	524	15	26	3	30	30	30	30	0	22	30	28	22	30	20	5	30	30	6	0	13	8	30	0	18	0	30	30	6	18	30	5	14
	525	15	27	4	30	30	30	30	0	22	30	28	22	30	20	5	30	30	6	0	13	8	30	0	17	0	30	30	6	18	30	5	13
	526	15	28	5	30	30	30	30	0	22	30	28	22	30	20	5	30	30	6	0	13	8	30	0	16	0	30	30	6	18	30	5	12
	527	16	29	6	30	30	30	30	0	22	30	28	22	30	20	5	30	30	6	0	13	8	30	0	15	0	30	30	6	18	30	5	11
	528	17	29	7	30	30	30	30	0	22	30	29	22	30	20	5	30	30	6	0	14	9	30	0	14	0	30	30	6	18	30	5	10
	529	18	28	8	30	30	30	30	0	21	30	30	22	30	20	5	30	30	6	0	15	10	30	0	13	0	30	30	6	18	30	5	10
	530	19	27	9	30	30	30	30	0	21	30	30	22	30	20	5	30	30	6	0	16	11	30	0	12	0	30	30	6	18	30	5	10
	531	19	27	10	30	30	30	30	0	21	30	30	22	30	20	5	30	30	6	0	17	12	30	0	11	0	30	30	6	18	30	5	10
	532	19	27	11	30	30	30	30	0	22	30	30	22	30	19	5	30	30	6	0	18	13	30	0	10	0	30	30	6	18	30	5	10
	533	19	27	11	30	30	30	30	0	22	30	30	22	30	19	5	30	30	6	0	19	14	30	0	9	0	30	30	6	18	30	5	10
	534	18	27	11	30	30	30	30	0	22	30	30	22	30	19	5	30	30	6	0	20	15	30	0	8	0	30	30	6	18	30	5	10
	535	17	27	11	30	30	30	30	0	22	30	30	23	30	19	5	30	30	6	0	21	16	30	0	7	0	30	30	6	17	30	5	10
	536	16	26	11	30	30	30	30	0	22	30	30	24	30	19	5	30	30	6	0	22	17	30	0	6	0	30	30	5	16	30	5	9
	537	15	25	11	30	30	30	30	0	22	30	30	24	30	19	4	30	30	6	0	23	18	30	0	5	0	30	30	4	15	30	5	8
	538	14	24	11	30	30	30	30	0	22	30	30	24	30	19	3	30	30	6	0	24	19	30	0	4	0	30	30	3	14	30	5	7
	539	13	23	11	30	30	30	30	0	22	30	30	24	30	19	2	30	30	6	0	25	20	30	0	3	0	30	30	2	13	30	5	6
	540	12	22	11	30	30	30	30	0	22	30	30	24	30	19	1	30	30	6	0	26	21	30	0	2	0	30	30	1	12	30	5	5
1	541	12	21	11	30	30	30	30	0	22	30	30	24	30	19	0	30	30	6	0	27	22	30	0	1	0	30	30	0	11	30	5	4
	542	12	20	11	30	30	30	30	0	22	30	30	24	30	20	0	30	30	6	0	28	23	30	0	0	0	30	30	0	10	30	5	3
	543	13	19	11	30	30	30	30	0	22	30	30	25	30	21	0	30	30	6	0	29	24	30	0	0	0	30	30	0	9	30	5	2
	544	14	18	11	30	29	30	30	0	22	30	30	26	30	22	0	30	30	6	0	30	25	30	0	0	0	30	29	0	8	30	5	1
	545	15	17	11	30	29	30	30	0	23	30	30	27	30	23	0	29	30	6	0	30	26	29	0	0	0	30	28	0	7	30	5	0
	546	16	16	11	30	29	30	30	0	24	30	30	28	30	24	0	28	30	6	0	30	27	28	0	0	0	30	27	0	6	30	5	0
	547	17	15	11	30	29	30	30	0	25	30	29	29	30	25	0	28	30	6	0	30	28	27	0	0	0	30	26	0	5	30	5	0
	548	18	14	11	30	29	30	30	0	26	30	28	30	30	26	0	28	30	6	0	30	29	26	0	0	0	30	25	0	4	30	5	0
	549	19	13	11	30	29	30	30	0	27	30	27	30	30	27	0	28	30	5	0	30	30	25	0	0	0	30	24	0	3	30	5	0
	550	20	13	11	30	29	30	30	0	28	30	26	30	30	28	0	28	30	4	0	30	30	24	0	0	0	30	23	0	2	30	4	0
	551	20	13	11	30	29	30	30	0	29	30	25	30	30	29	0	28	30	3	0	30	30	23	0	0	0	30	22	0	1	30	3	0
	552	20	13	10	30	29	30	30	0	29	30	24	30	30	29	0	28	30	2	0	30	30	22	0	0	0	30	22	0	0	30	2	1
	553	20	13	9	30	29	30	30	1	29	30	23	30	30	29	0	28	30	1	0	30	30	21	0	0	0	30	22	0	0	30	1	2
	554	20	13	8	30	29	30	30	2	29	30	22	30	30	29	0	28	30	0	0	30	30	20	0	0	0	30	22	0	0	30	0	3
	555	20	13	7	30	29	30	30	3	29	30	21	30	30	29	0	28	30	0	0	30	30	19	0	0	0	30	22	0	0	30	0	4
	556	20	13	6	30	29	30	30	4	28	30	20	30	30	29	0	28	30	0	0	30	30	18	0	0	0	30	22	0	0	30	0	5
	557	20	13	5	30	29	30	30	5	27	30	19	30	30	29	0	28	30	0	0	30	30	17	0	0	0	30	22	0	0	30	0	6
	558	19	14	4	30	29	30	30	5	26	30	18	30	30	29	0	27	30	0	0	30	30	16	0	0	0	30	22	0	0	30	0	7
	559	18	15	3	30	29	30	30	5	26	30	18	30	30	29	0	26	30	0	0	30	30	15	0	0	0	30	22	0	0	30	0	8
	560	17	16	2	29	29	29	30	5	25	30	18	30	30	29	0	25	30	0	0	29	30	14	0	0	0	30	22	0	0	30	0	8
	561	17	15	1	28	29	28	30	5	24	30	18	30	30	29	0	24	30	0	0	28	30	13	0	0	0	30	22	0	0	30	0	8
	562	17	14	0	27	29	27	30	5	23	30	18	30	30	30	0	23	30	0	0	27	30	12	0	0	0	30	22	0	0	30	0	8
	563	17	13	0	26	29	26	30	5	22	30	18	30	30	30	0	22	30	0	0	26	30	11	0	0	0	30	22	0	0	30	0	8
	564	17	12	0	25	29	25	30	5	21	30	18	30	30	30	0	21	29	0	0	25	30	10	0	0	0	30	22	0	0	30	0	8
	565	17	11	0	24	29	24	30	5	20	30	18	30	30	30	0	20	29	0	0	24	30	9	0	0	0	30	22	0	0	30	0	8
	566	17	11	0	23	29	23	30	5	19	30	18	30	30	30	0	19	29	0	0	23	30	8	0	0	0	30	22	0	0	30	0	8
	567	17	11	0	22	29	22	30	5	18	30	18	30	30	30	0	18	29	0	0	22	30	7	0	0	0	30	22	0	0	30	0	8
	568	17	11	0	21	29	21	30	5	17	30	18	30	30	30	0	17	29	0	0	21	30	6	0	0	0	30	22	0	1	30	0	8
	569	17	11	0	20	29	20	30	5	16	30	18	30	30	30	0	16	29	0	0	20	30	5	0	0	0	30	22	0	2	30	0	8
	570	17	11	0	19	29	19	30	5	15	30	18	30	30	30	0	15	29	0	0	19	30	4	0	0	0	30	22	0	3	30	0	8
1	571	16	11	0	18	29	18	30	5	14	30	18	30	30	30	0	14	29	0	0	18	30	3	0	0	0	30	22	0	4	30	0	8
	572	15	11	0	17	29	17	30	5	13	30	18	30	30	30	0	13	29	0	0	17	30	2	0	0	0	30	21	0	5	30	0	8
	573	14	11	0	16	28	16	30	5	12	30	18	30	30	29	0	12	29	0	0	16	30	1	0	0	0	30	20	0	5	29	0	8
	574	13	11	0	15	28	15	30	5	12	30	18	30	30	28	0	11	29	0	0	15	30	0	0	0	0	30	20	0	5	28	0	8
	575	12	11	0	14	27	14	30	5	12	30	18	30	30	27	0	11	29	0	0	14	30	0	0	0	0	30	20	0	5	27	0	8
	576	11	11	0	13	26	13	30	5	12	30	18	30	30	26	0	11	29	0	0	13	30	0	0	0	0	30	20	0	5	26	0	8
	577	10	11	0	12	25	12	30	5	12	30	19	30	30	25	0	10	29	0	0	12	30	0	0	0	0	29	20	0	5	25	0	8
	578	9	11	0	11	24	11	30	5	12	30	20	30	30	24	0	9	29	0	0	11	30	0	0	0	0	28	20	0	5	24	0	8
	579	8	11	0	10	23	10	30	5	11	30	21	30	30	23	0	8	29	0	0	10	30	0	0	0	0	27	20	0	5	23	0	8
	580	7	11	0	9	22	9	30	5	10	30	22	30	30	22	0	7	29	0	0	9	30	0	0	0	0	26	20	0	5	22	0	8
	581	6	11	0	8	21	9	30	5	9	30	23	30	30	21	0	6	29	0	0	8	30	0	0	0	0	25	20	0	5	21	0	8
	582	5	11	0	7	20	9	30	5	8	30	24	30	30	20	0	5	29	0	0	7	30	0	0	0	0	24	19	0	5	20	0	7
	583	4	11	0	6	19	9	30	4	7	30	25	30	30	19	0	4	29	0	0	6	30	0	0	0	0	23	18	0	5	19	0	6
	584	4	11	0	5	18	9	30	3	6	30	26	30	30	18	0	3	29	0	0	5	30	0	0	0	0	22	17	0	5	18	0	5
	585	4	11	0	4	17	9	30	2	5	30	27	30	30	18	0	2	29	0	0	4	30	0	0	0	0	21	16	0	5	17	0	4
	586	4	11	0	3	16	9	30	1	5	30	28	30	30	18	0	1	29	0	0	3	30	0	0	0	0	20	15	0	5	16	0	3
	587	4	10	0	2	15	9	30	0	5	30	29	30	30	18	0	0	29	0	0	2	30	0	0	0	0	19	14	0	5	15	0	2
	588	5	9	0	1	14	8	30	0	5	30	30	30	29	18	0	0	29	0	0	1	30	0	0	0	0	18	13	0	5	14	0	1
	589	5	8	0	0	13	8	30	0	5	30	30	30	29	18	0	0	29	0	0	0	29	0	0	0	0	17	12	0	5	13	0	0
	590	5	7	0	0	12	9	30	0	5	30	30	30	29	18	0	0	29	0	0	0	28	0	0	0	0	16	11	0	5	12	0	0
	591	5	7	0	0	11	10	30	0	5	30	30	30	29	18	0	0	29	0	0	0	27	0	0	0	0	15	10	0	5	11	0	0
	592	5	8	0	0	10	11	30	0	5	30	30	30	29	18	0	0	29	0	0	0	26	0	0	0	0	14	9	0	5	10	0	0
	593	5	9	0	0	9	12	30	0	5	30	30	30	29	18	0	0	29	0	0	0	25	0	0	0	1	13	8	0	5	9	0	0
	594	5	10	0	0	8	12	30	0	5	30	30	30	29	18	0	1	30	0	0	0	24	0	0	0	2	12	7	0	5	8	0	0
	595	5	11	0	0	7	12	30	0	5	30	30	30	28	18	0	2	30	0	0	0	23	0	0	0	3	11	6	0	5	7	0	0
	596	5	12	0	0	6	12	30	0	5	30	30	30	27	18	0	3	30	0	0	0	22	0	0	0	4	10	5	0	5	6	0	0
	597	5	13	0	0	5	12	30	0	5	30	29	30	26	18	0	4	30	0	0	0	21	0	0	0	5	9	4	0	5	5	0	0
	598	5	13	0	0	4	12	30	0	5	30	28	30	25	17	0	5	30	0	0	0	20	0	0	0	6	8	3	0	4	4	0	0
	599	5	13	0	0	3	13	30	0	5	30	27	30	25	16	0	6	30	0	0	0	19	0	0	0	7	7	2	0	3	3	0	0
	600	5	13	0	0	2	14	30	0	5	30	26	30	25	15	0	7	30	0	0	0	18	0	0	0	8	6	1	1	2	2	0	0
1	601	5	13	0	0	1	15	30	0	5	30	25	30	25	14	1	7	30	0	0	0	17	0	0	0	9	5	0	2	1	1	0	0
	602	5	13	0	0	0	16	30	0	5	30	24	30	25	13	2	7	30	0	0	0	16	0	0	0	10	4	0	3	0	0	0	0
	603	5	13	0	0	0	17	30	0	5	30	23	29	25	13	3	7	30	0	0	0	15	0	0	0	11	3	0	4	0	0	0	0
	604	5	13	0	0	0	18	30	0	4	30	22	28	25	13	4	7	30	0	0	0	14	0	0	0	11	2	0	5	0	0	0	0
	605	5	13	0	0	0	19	29	0	3	30	21	27	25	13	5	7	30	0	0	0	13	0	0	0	11	1	0	6	0	0	0	0
	606	5	13	0	0	0	19	29	0	2	30	20	26	25	13	5	7	30	0	0	0	12	0	0	0	11	0	0	7	0	0	0	0
	607	5	13	0	0	0	19	29	0	1	29	19	25	25	13	5	7	30	0	0	0	11	0	0	0	11	0	0	8	0	0	0	0
	608	5	13	0	0	0	19	29	0	0	28	18	24	25	13	5	7	30	0	0	0	10	0	0	0	11	0	0	9	0	0	0	0
	609	5	13	0	0	1	19	29	0	0	27	17	23	25	13	5	7	30	0	0	0	9	0	0	0	11	0	0	9	0	0	0	0
	610	5	12	0	0	2	19	29	0	0	26	16	22	25	13	5	7	29	0	0	0	8	0	0	0	11	0	0	9	0	0	0	0
	611	5	11	0	0	3	19	29	0	0	25	15	21	25	13	5	7	28	0	0	0	7	0	0	0	11	0	0	9	0	0	0	0
	612	5	10	0	0	4	19	29	0	0	24	14	20	25	13	5	7	27	0	0	0	6	0	0	0	11	0	0	9	0	0	0	0
	613	5	9	0	0	5	19	29	0	0	23	13	19	25	13	5	7	26	0	0	0	5	0	0	0	11	0	0	9	0	0	0	0
	614	4	8	0	0	6	19	29	0	0	22	12	18	25	13	5	7	25	0	0	0	4	0	0	0	11	0	0	9	0	0	0	0
	615	4	7	0	0	7	19	29	0	0	21	11	17	25	12	5	7	24	0	0	0	3	0	0	0	11	0	0	9	0	0	0	0
	616	4	6	0	0	7	19	29	0	0	20	10	16	25	11	5	7	23	0	0	0	2	0	0	0	11	0	0	9	0	0	0	0
	617	4	6	0	0	7	18	29	0	0	20	9	15	25	10	5	7	22	0	0	0	1	0	0	0	11	0	0	9	0	0	0	0
	618	4	6	0	0	7	18	29	0	0	20	8	14	26	9	5	7	21	0	0	0	0	0	0	0	11	0	0	9	0	0	0	0
	619	5	6	0	0	7	17	29	0	0	20	7	13	26	8	5	7	20	0	0	0	0	0	0	0	11	0	0	9	0	0	0	0
	620	6	6	0	0	7	16	29	0	0	20	6	12	26	7	5	7	19	0	0	0	0	0	0	0	11	0	0	9	0	0	0	0
	621	7	6	0	0	7	15	29	0	0	20	5	11	25	6	5	7	18	0	0	0	0	0	0	0	11	0	0	9	0	0	0	0
	622	7	5	0	0	7	14	29	0	0	19	4	10	24	5	5	7	17	0	0	0	0	0	0	0	11	0	0	9	0	0	0	0
	623	7	4	0	0	7	13	29	0	0	18	3	9	23	4	5	7	16	0	0	0	0	0	0	0	10	0	0	9	0	0	0	0
	624	7	3	0	0	7	13	29	0	0	17	2	8	22	3	5	6	15	0	0	0	0	0	0	0	9	0	0	9	0	0	0	0
	625	7	2	0	0	7	13	29	0	1	16	1	7	22	3	5	5	14	0	0	0	0	0	0	0	8	0	0	9	0	0	0	0
	626	7	1	0	0	7	13	29	0	2	15	0	6	22	3	5	4	13	0	0	0	0	0	0	0	7	0	0	9	0	0	0	0
	627	7	0	0	0	7	13	29	0	3	14	0	6	22	3	5	3	12	0	0	0	0	0	0	0	6	0	0	9	0	0	0	0
	628	8	0	0	0	7	13	29	0	4	14	0	6	22	4	5	2	11	0	0	0	0	0	0	0	5	0	0	9	0	0	0	0
	629	9	0	0	0	7	12	29	0	5	14	0	6	21	5	5	1	10	0	0	0	0	0	0	0	4	0	0	9	0	0	0	0
	630	10	0	0	0	7	11	29	0	6	14	0	6	20	6	5	0	9	0	0	0	0	0	0	0	3	0	0	8	0	0	0	0
1	631	11	0	0	0	7	10	29	0	7	14	0	6	19	7	4	0	8	0	0	0	0	0	0	0	2	0	0	7	0	0	0	0
	632	12	0	0	0	7	9	29	0	8	14	0	6	18	8	3	0	7	0	0	0	0	0	0	0	1	0	0	6	0	0	0	0
	633	13	0	0	0	7	8	29	0	9	13	0	7	17	8	2	0	6	0	0	0	0	0	0	0	0	0	0	5	0	0	0	0
	634	13	0	0	0	7	7	29	0	10	12	0	8	16	8	1	0	5	0	0	0	0	0	0	0	0	0	0	4	0	0	0	0
	635	13	0	0	0	7	6	30	0	10	11	0	8	15	8	0	0	4	0	0	0	0	0	0	0	0	0	0	3	0	0	0	0
	636	13	0	0	0	7	6	29	0	10	10	0	8	14	8	0	0	3	0	0	0	0	0	0	0	0	0	0	2	0	0	0	0
	637	13	0	0	0	7	6	28	0	10	10	0	8	13	8	0	0	2	0	0	0	0	0	0	0	0	0	0	1	0	0	0	0
	638	13	0	0	0	7	6	27	0	10	10	0	8	12	8	0	0	1	0	0	0	0	0	0	0	0	0	0	0	0	0	0	0
	639	13	0	0	0	6	6	27	0	10	10	0	8	11	8	0	0	0	0	0	0	0	0	0	0	0	0	0	0	0	0	0	0
	640	13	0	0	0	5	6	27	0	10	10	0	8	10	8	0	0	0	0	0	0	0	0	0	0	0	0	0	0	0	0	0	0
	641	13	0	0	0	5	5	27	0	10	10	0	8	9	8	0	0	0	0	0	0	0	0	0	0	0	0	0	0	0	0	0	0
	642	13	0	0	0	5	4	27	0	10	10	0	8	9	8	0	0	0	0	0	0	0	0	0	0	0	0	0	0	0	0	0	0
	643	13	0	0	0	5	3	27	0	10	10	0	8	9	8	0	0	0	0	0	0	0	0	0	0	0	0	0	0	0	0	0	0
	644	14	0	0	0	5	2	26	0	10	10	0	8	9	9	0	0	0	0	0	0	0	0	0	0	0	0	0	0	0	0	0	0
	645	14	0	0	0	5	1	25	0	10	10	0	8	9	10	0	0	0	0	0	0	0	0	0	0	0	0	0	0	0	0	0	1
	646	14	0	0	0	6	0	24	0	10	10	0	8	9	11	0	0	0	0	0	0	0	0	0	0	0	0	0	0	0	0	0	2
	647	14	0	0	0	6	0	23	0	10	9	0	8	8	12	0	0	0	0	0	0	0	0	0	0	0	0	0	0	0	0	0	3
	648	14	0	0	0	6	0	22	0	10	8	0	8	7	13	0	0	0	0	0	0	0	0	0	0	0	0	0	0	0	0	0	4
	649	13	0	0	0	6	0	21	0	10	7	0	8	6	14	0	0	0	0	0	0	0	0	0	0	0	0	0	0	0	0	0	5
	650	12	0	0	0	6	0	20	0	10	6	0	8	5	15	0	0	0	0	0	0	0	0	0	0	0	0	0	0	0	0	0	6
	651	11	0	0	0	6	0	19	0	10	5	0	8	5	16	0	0	0	0	0	0	0	0	0	0	0	0	0	0	0	0	0	7
	652	11	0	0	0	6	0	18	0	10	5	0	8	5	17	0	0	0	0	0	0	0	0	0	0	0	0	0	0	0	0	0	8
	653	11	0	0	0	6	0	17	0	10	5	0	8	5	18	0	0	0	0	0	0	0	0	0	0	0	0	0	0	0	0	0	9
	654	11	0	0	0	6	0	16	0	10	5	0	8	5	19	0	0	0	0	0	0	0	0	0	0	0	0	0	0	0	0	0	10
	655	11	0	0	0	6	0	15	0	9	5	0	8	5	19	0	0	0	0	0	0	0	0	0	0	0	0	0	0	0	0	0	11
	656	11	0	0	0	6	1	14	0	8	5	0	8	5	18	0	0	0	0	0	0	0	0	0	0	0	0	0	0	0	0	0	12
	657	11	0	0	0	6	2	13	0	7	5	0	7	5	17	0	0	0	0	0	0	0	0	0	0	0	0	0	0	0	0	0	12
	658	10	0	0	0	6	3	12	0	6	4	0	6	5	16	0	0	0	0	0	0	0	0	0	0	0	0	0	0	0	0	0	12
	659	9	0	0	0	6	4	11	0	5	3	0	5	5	15	0	0	0	0	0	0	0	0	0	0	0	0	0	0	0	0	0	12
	660	8	0	0	0	6	5	10	0	4	2	0	4	5	14	0	0	0	0	0	0	0	0	0	0	0	0	0	0	0	0	0	12
1	661	7	0	0	0	6	6	9	0	3	1	0	3	5	13	0	0	0	0	0	0	0	0	0	0	0	0	0	0	0	0	0	12
	662	6	0	0	0	6	6	8	0	2	0	0	2	5	12	0	0	0	0	0	0	0	0	0	0	0	0	0	0	0	0	0	12
	663	5	0	0	0	6	6	7	0	1	0	0	1	5	12	0	0	0	0	0	0	0	0	0	0	0	0	0	0	0	0	0	12
	664	5	0	0	0	6	6	6	0	0	0	0	0	5	12	0	0	0	0	0	0	0	0	0	0	0	0	0	0	0	0	0	12
	665	5	0	0	0	6	6	5	0	0	0	0	0	5	12	0	0	0	0	0	0	0	0	0	0	0	0	0	0	0	0	0	12
	666	5	0	0	0	6	6	5	0	0	0	0	0	5	12	0	0	0	0	0	0	0	0	0	0	0	0	0	0	0	0	0	12
	667	5	0	0	0	6	6	5	0	0	0	0	0	5	12	0	0	0	0	0	0	0	0	0	0	0	0	0	0	0	0	0	12
	668	5	0	0	0	6	6	5	0	0	0	0	0	5	12	0	0	0	0	0	0	0	0	0	0	0	0	0	0	0	0	0	12
	669	5	0	0	0	6	6	4	0	0	0	0	0	5	12	0	0	0	0	0	0	0	0	0	0	0	0	0	0	0	0	0	12
	670	5	0	0	0	6	6	3	0	0	0	0	0	5	12	0	0	0	0	0	0	0	0	0	0	0	0	0	0	0	0	0	12
	671	5	0	0	0	5	6	2	0	0	0	0	0	5	12	0	0	0	0	0	0	0	0	0	0	0	0	0	0	0	0	0	12
	672	5	0	0	0	4	6	1	0	0	0	0	0	4	12	0	0	0	0	0	0	0	0	0	0	0	0	0	0	0	0	0	12
	673	6	0	0	0	3	6	0	0	0	0	0	0	3	12	0	0	0	0	0	0	0	0	0	0	0	0	0	0	0	0	0	12
	674	6	0	0	0	2	6	0	0	0	0	0	0	2	12	0	0	0	0	0	0	0	0	0	0	0	0	0	0	0	0	0	12
	675	6	0	0	1	1	6	0	0	0	0	0	0	1	12	0	0	0	0	0	0	0	0	0	0	0	0	0	0	0	0	0	11
	676	6	0	0	2	0	6	0	0	0	0	0	0	0	12	0	0	0	0	0	0	0	0	0	0	0	0	0	0	0	0	0	10
	677	6	0	0	3	0	6	0	0	0	0	0	0	0	12	0	0	0	0	0	0	0	0	0	0	0	0	0	0	0	0	0	9
	678	6	0	0	4	0	6	0	0	0	0	0	0	0	12	0	0	0	0	0	0	0	0	0	0	0	0	0	0	0	0	0	8
	679	6	0	0	5	0	6	0	0	0	0	0	0	0	11	0	0	0	0	0	0	0	0	0	0	0	0	0	0	0	0	0	7
	680	6	0	0	6	0	6	0	0	0	0	0	0	0	10	0	0	0	0	0	0	0	0	0	0	0	0	0	0	0	0	0	6
	681	6	0	0	6	0	6	0	0	0	0	0	0	0	9	0	0	0	0	0	0	0	0	0	0	0	0	0	0	0	0	0	5
	682	6	0	0	6	0	6	0	0	0	0	0	0	0	8	0	0	0	0	0	0	0	0	0	0	0	0	0	0	0	0	0	4
	683	6	0	0	6	0	6	0	0	0	0	0	0	0	7	0	0	0	0	0	0	0	0	0	0	0	0	0	0	0	0	0	3
	684	6	0	0	6	0	6	0	0	0	0	0	0	0	6	0	0	0	0	0	0	0	0	0	0	0	0	0	0	0	0	0	2
	685	6	0	0	6	0	6	0	0	0	0	0	0	0	5	0	0	0	0	0	0	0	0	0	0	0	0	0	0	0	0	0	1
	686	6	0	0	6	0	5	0	0	0	0	0	0	0	5	0	0	0	0	0	0	0	0	0	0	0	0	0	0	0	0	0	0
	687	6	0	0	6	0	4	0	0	0	0	0	0	0	5	0	0	0	0	0	0	0	0	0	0	0	0	0	0	0	0	0	0
	688	6	0	0	6	0	3	0	0	0	0	0	0	0	5	0	0	0	0	0	0	0	0	0	0	0	0	0	0	0	0	0	0
	689	6	0	0	6	0	2	0	0	0	0	0	0	0	5	0	0	0	0	0	0	0	0	0	0	0	0	0	0	0	0	0	0
	690	6	0	0	6	0	1	0	0	0	0	0	0	0	5	0	0	0	0	0	0	0	0	0	0	0	0	0	0	0	0	0	0
1	691	6	0	0	6	0	0	0	0	0	0	0	0	0	5	0	0	0	0	0	0	0	0	0	0	0	0	0	0	0	0	0	0
	692	6	0	0	6	0	0	0	0	0	0	0	0	0	5	0	0	0	0	0	0	0	0	0	0	0	0	0	0	0	0	0	0
	693	6	0	0	6	0	0	0	0	0	0	0	0	0	5	0	0	0	0	0	0	0	0	0	0	0	0	0	0	0	0	0	0
	694	6	0	0	6	0	0	0	0	0	0	0	0	0	5	0	0	0	0	0	0	0	0	0	0	0	0	0	0	0	0	0	0
	695	6	0	0	6	0	0	0	0	0	0	0	0	0	5	0	0	0	0	0	0	0	0	1	0	0	0	0	0	0	0	0	0
	696	6	0	0	6	0	0	0	0	0	0	0	0	0	5	0	0	0	0	0	0	0	0	2	0	0	0	0	0	0	0	0	0
	697	6	0	0	6	0	0	0	0	0	0	0	0	0	6	0	0	0	0	0	0	0	0	3	0	0	0	0	0	0	0	0	0
	698	6	0	0	6	0	0	0	0	0	0	0	0	0	7	0	0	0	0	0	0	0	0	4	0	0	0	0	0	0	0	0	0
	699	6	0	0	6	0	0	0	0	0	0	0	0	0	8	0	0	0	0	0	0	0	0	5	0	0	0	0	0	0	0	0	0
	700	6	0	0	6	0	0	0	0	0	0	0	0	0	9	0	0	0	0	0	0	0	0	6	0	0	0	0	0	0	0	0	0
	701	6	0	0	6	0	0	0	0	0	0	0	0	0	10	0	0	0	0	0	0	0	0	7	0	0	0	0	0	0	0	0	0
	702	6	0	0	6	0	0	0	0	0	0	0	0	0	10	0	0	0	0	0	0	0	0	8	0	0	0	0	0	0	0	0	0
	703	5	0	0	6	0	0	0	0	0	0	0	0	0	10	1	0	0	0	0	0	0	0	9	0	0	0	0	0	0	0	0	0
	704	4	0	0	6	0	0	0	0	0	0	0	0	0	9	2	0	0	0	0	0	0	0	10	0	0	0	0	0	0	0	0	0
	705	3	0	0	5	0	0	0	0	0	0	0	0	0	8	3	0	0	0	0	0	0	0	10	0	0	0	0	0	0	0	0	0
	706	2	0	0	4	0	0	0	0	0	0	0	0	0	7	4	0	0	0	0	0	0	0	10	0	1	0	0	0	0	0	0	0
	707	1	0	1	3	0	0	0	0	0	0	0	0	0	6	5	0	0	0	1	1	0	0	10	0	2	0	0	0	0	0	1	0
	708	0	0	2	2	0	0	0	0	0	0	0	0	0	6	6	0	0	0	2	2	0	0	10	0	3	0	0	0	0	0	2	0
	709	1	0	3	1	0	0	0	0	0	0	0	0	0	7	7	0	0	0	3	3	0	0	10	0	4	0	0	1	0	0	3	0
	710	2	0	4	0	0	0	0	0	0	0	0	0	0	8	8	0	0	0	4	4	0	0	10	0	5	0	0	2	0	0	4	0
	711	3	0	5	0	0	0	0	0	0	0	0	0	0	9	9	0	0	0	5	5	0	0	10	0	6	0	0	3	0	0	5	0
	712	4	0	5	0	0	0	0	0	0	0	0	0	0	10	10	0	0	0	6	6	0	0	10	0	7	0	0	4	0	0	6	0
	713	5	0	5	0	0	0	0	0	0	0	0	0	0	11	11	0	0	0	7	7	0	0	10	0	8	0	0	5	0	0	7	0
	714	5	0	5	0	0	0	0	0	0	0	0	0	0	12	12	0	0	0	7	8	0	0	10	0	9	0	0	5	0	0	7	0
	715	5	0	5	0	1	0	0	0	0	0	0	0	0	13	12	0	0	0	7	9	0	0	10	0	10	0	0	5	0	0	7	0
	716	5	0	5	0	2	0	0	0	0	0	0	0	0	14	12	0	0	0	7	10	0	0	10	0	11	0	0	5	0	0	7	0
	717	5	0	5	0	3	0	0	0	0	0	0	0	0	15	12	0	0	0	7	11	0	0	10	0	12	0	0	5	0	0	7	0
	718	5	0	5	1	4	0	0	0	0	0	0	0	0	16	12	0	0	0	7	12	0	0	10	0	13	0	0	5	0	0	7	0
	719	5	0	5	2	5	0	0	0	0	0	0	0	0	17	13	0	0	0	7	13	0	0	10	0	14	0	0	5	0	0	7	0
	720	5	0	5	3	6	0	0	0	0	0	0	0	0	17	14	1	0	0	7	14	0	0	10	0	15	0	0	5	0	0	7	0
1	721	5	0	5	4	7	0	0	0	0	0	0	0	0	17	15	2	0	0	7	15	0	0	10	0	16	0	0	5	0	0	7	0
	722	5	0	5	5	8	0	0	0	0	0	0	0	0	17	16	3	0	0	7	16	0	0	10	0	17	0	0	6	0	0	7	0
	723	5	0	5	6	9	0	0	0	0	0	0	0	0	17	17	4	0	0	7	17	0	0	10	0	18	0	0	7	0	0	8	0
	724	5	0	5	7	10	0	0	0	0	0	0	0	0	17	18	5	0	0	7	18	0	0	10	0	19	0	0	8	0	0	9	0
	725	5	0	5	8	11	0	0	0	0	0	0	0	0	17	18	5	0	0	7	19	0	0	10	0	20	0	0	9	0	0	10	0
	726	5	0	5	9	12	0	0	0	0	0	0	0	0	18	19	6	0	0	7	20	0	0	10	0	21	0	0	10	0	0	11	0
	727	5	0	5	10	13	0	0	0	1	0	0	0	0	18	20	7	0	0	7	21	0	0	10	0	22	0	0	11	0	0	12	0
	728	5	0	5	11	14	0	0	0	2	0	0	0	0	18	21	8	0	0	7	22	0	0	10	0	23	0	0	12	0	0	13	0
	729	5	0	5	12	15	0	0	0	3	0	0	0	0	18	22	9	0	0	7	23	0	0	10	0	24	0	0	12	0	0	14	0
	730	5	0	5	13	16	0	0	0	4	0	0	0	0	18	23	10	0	0	8	24	0	0	10	0	25	0	0	12	0	0	15	0
	731	5	0	5	14	17	0	0	0	5	0	0	0	0	18	24	11	0	0	9	25	0	0	10	0	26	0	0	13	0	0	16	0
	732	5	0	5	14	18	0	0	0	6	0	0	0	0	19	25	12	0	0	10	26	0	0	10	0	27	0	0	14	0	0	17	0
	733	5	0	5	15	19	0	0	0	7	0	0	0	0	20	24	13	0	0	11	27	0	0	10	0	28	0	0	15	0	0	18	0
	734	5	0	5	16	20	0	0	0	8	0	0	0	0	21	23	14	0	0	12	28	0	0	10	0	29	0	0	16	0	0	19	0
	735	5	0	5	17	21	0	0	0	9	0	0	0	0	22	22	15	0	0	13	29	0	0	11	0	30	0	0	17	0	0	20	0
	736	5	0	5	18	22	0	0	0	10	0	0	0	0	23	21	16	0	0	14	30	0	0	12	0	30	0	0	18	0	0	21	0
	737	5	0	4	19	23	0	0	0	11	0	0	0	0	24	20	17	0	0	14	29	0	0	13	0	30	0	0	19	0	0	21	0
	738	5	0	3	20	24	0	0	0	12	0	0	0	0	24	19	18	0	0	14	28	0	0	14	0	30	0	0	20	0	0	21	0
	739	4	0	2	21	25	0	0	0	13	0	0	0	0	24	18	19	0	0	14	27	0	0	15	0	30	0	0	20	0	0	21	0
	740	3	0	1	22	26	0	0	0	14	0	0	0	0	24	17	19	0	0	14	26	0	0	16	0	30	0	0	20	0	0	21	0
	741	2	0	0	23	27	0	0	0	15	0	0	0	0	24	17	20	0	0	14	26	0	0	17	0	30	0	0	20	0	0	21	1
	742	1	0	0	24	28	0	0	0	16	0	0	0	0	24	17	21	0	0	14	26	0	0	18	0	30	0	0	20	0	0	21	2
	743	0	0	0	25	29	0	0	0	17	0	0	0	0	24	17	22	0	0	14	26	0	0	19	1	30	0	0	20	0	0	21	3
	744	0	0	0	26	30	0	1	0	18	0	0	0	0	24	17	23	0	0	14	26	0	0	20	2	30	0	0	21	0	0	22	4
	745	0	0	0	27	30	0	2	0	19	0	0	0	0	24	18	24	0	0	14	26	0	0	21	3	30	0	0	22	0	0	23	5
	746	0	0	0	28	30	0	3	0	20	0	0	0	0	23	19	25	0	0	14	26	0	0	22	4	30	0	0	23	0	0	24	6
	747	0	0	1	29	30	0	4	0	21	0	0	0	0	22	20	26	0	0	15	26	0	0	23	5	30	0	0	24	0	0	25	7
	748	0	0	2	29	30	0	5	0	22	0	0	0	0	21	21	27	0	0	16	26	0	0	23	6	30	0	0	25	0	0	26	8
	749	0	0	3	29	30	0	6	0	23	0	0	0	0	20	21	28	0	0	17	26	0	0	23	7	29	0	0	26	0	0	27	8
	750	0	0	4	29	30	0	7	0	24	0	0	0	0	21	21	28	0	0	18	26	0	0	23	8	29	0	0	27	0	0	28	8
1	751	0	0	5	29	30	0	8	0	25	0	0	0	0	22	21	28	0	0	19	26	0	0	23	9	29	0	0	28	0	0	29	8
	752	0	0	6	29	30	0	9	0	26	0	0	0	0	23	21	28	0	0	20	26	0	0	23	10	29	0	0	28	0	0	30	8
	753	0	0	7	29	30	0	10	0	27	0	0	0	0	24	21	28	0	0	21	26	0	0	23	11	29	1	0	28	0	0	30	8
	754	0	0	8	29	30	0	11	0	28	1	0	0	0	25	21	28	1	0	22	26	0	0	23	12	29	2	0	28	0	0	30	8
	755	0	0	9	29	30	0	12	0	29	2	0	0	0	26	22	29	2	0	23	26	0	0	22	13	29	3	0	28	0	0	30	8
	756	0	0	10	29	30	0	13	0	30	3	0	0	0	26	22	29	3	1	24	26	0	0	21	14	28	4	0	27	0	0	30	8
	757	0	0	11	29	30	0	14	0	30	4	0	0	0	26	22	29	4	2	25	26	0	0	20	15	28	5	0	26	0	0	30	8
	758	0	0	12	29	30	0	15	0	29	5	0	0	0	26	22	29	5	3	26	26	0	0	19	16	28	6	0	25	0	0	30	8
	759	0	0	12	29	30	0	16	0	29	5	0	0	0	25	22	29	6	4	26	26	0	1	18	17	28	7	0	25	0	0	30	8
	760	0	0	12	29	30	0	17	0	29	6	0	0	0	25	22	29	7	5	25	26	0	2	17	18	28	8	0	25	0	0	30	8
	761	0	0	12	29	30	0	18	0	29	7	0	0	0	25	22	29	8	6	24	25	0	3	16	19	28	9	0	24	0	0	30	8
	762	0	0	12	30	30	0	19	0	29	8	0	0	0	25	22	29	9	7	23	24	0	4	15	20	28	10	0	23	0	0	30	8
	763	0	0	12	30	30	0	20	0	29	9	0	0	0	25	23	29	10	8	22	23	0	5	14	21	28	11	0	22	0	0	30	8
	764	0	0	12	30	30	0	21	0	29	10	0	0	0	25	24	29	11	9	21	22	0	6	13	22	28	12	0	21	0	0	30	8
	765	0	0	12	30	30	0	22	0	29	11	0	0	0	25	25	29	12	10	21	21	0	7	12	23	28	13	0	20	0	0	30	8
	766	1	0	12	30	30	0	23	0	29	12	0	0	0	25	26	29	13	11	21	20	0	8	11	24	28	14	0	19	0	0	30	8
	767	2	0	12	30	30	0	24	0	29	13	1	0	0	25	27	29	14	12	21	20	0	9	10	25	28	15	0	18	0	0	30	8
	768	3	0	12	30	30	0	25	0	29	14	2	0	0	25	28	29	15	13	21	20	0	10	9	26	28	16	0	18	0	0	30	8
	769	4	0	12	30	30	0	26	0	29	14	3	0	0	25	29	29	16	14	21	20	0	11	8	26	27	17	0	18	0	1	30	8
	770	5	0	12	30	30	1	27	0	29	15	4	0	0	25	30	30	17	15	21	20	0	11	7	26	27	18	0	18	0	2	30	8
	771	5	0	12	30	30	2	28	0	29	16	5	0	0	25	30	30	18	16	21	19	0	11	6	26	27	19	0	18	1	3	29	7
	772	5	0	12	30	30	3	29	1	29	17	6	0	0	25	29	30	19	17	21	18	0	11	5	26	27	20	0	18	2	4	28	6
	773	5	0	12	30	30	4	30	2	29	18	7	0	0	25	28	30	20	18	21	17	0	11	4	25	27	21	0	18	3	5	27	6
	774	5	0	12	30	30	5	30	3	29	19	8	0	0	25	28	30	21	19	22	16	0	11	4	24	27	22	0	18	4	6	26	6
	775	5	0	12	30	30	6	30	4	29	20	9	0	0	25	28	30	22	20	23	15	0	11	4	23	27	23	0	18	5	7	25	6
	776	5	0	12	30	30	7	30	5	29	21	10	1	0	26	28	30	23	21	24	14	0	12	4	22	27	24	0	18	6	8	25	6
	777	5	0	12	30	30	8	30	6	29	22	11	2	0	27	28	29	24	22	24	13	0	13	4	21	26	25	0	18	7	9	25	6
	778	5	0	12	30	30	9	30	7	29	23	12	3	1	28	28	29	25	23	24	12	0	14	5	21	26	26	0	18	8	10	25	6
	779	5	0	12	29	30	10	30	8	29	24	13	4	2	29	28	29	26	24	24	11	0	15	6	21	27	27	0	18	9	11	25	7
	780	5	0	12	29	30	11	30	9	29	25	14	5	3	29	28	29	27	25	24	10	0	16	6	21	27	28	0	18	10	12	25	8
1	781	5	0	12	29	30	12	30	10	29	26	15	6	4	29	28	29	28	26	24	9	0	17	6	21	27	29	0	18	11	13	25	9
	782	5	0	12	29	30	13	30	11	28	27	16	7	5	29	28	29	29	27	24	8	0	17	6	21	27	30	1	18	12	14	25	10
	783	5	0	11	29	30	14	30	12	28	28	17	8	6	29	28	29	30	28	24	7	0	17	6	21	26	30	2	18	13	15	25	11
	784	5	0	10	29	30	15	30	13	28	28	18	9	7	29	28	29	30	29	24	6	0	17	6	21	26	30	3	18	14	16	25	12
	785	5	0	9	29	30	16	30	14	28	28	19	10	8	29	28	29	30	30	24	5	0	17	6	21	26	30	4	18	15	17	25	13
	786	5	0	8	29	30	17	30	15	28	28	20	11	9	29	28	29	30	30	23	5	0	17	7	21	27	30	5	19	16	18	25	14
	787	5	0	7	29	30	18	30	16	28	28	21	12	10	29	28	29	30	30	22	5	0	17	8	21	27	30	6	20	17	19	25	15
	788	6	1	6	29	30	19	30	17	29	28	22	13	11	29	28	29	30	30	21	5	0	17	9	21	27	30	7	21	18	20	25	16
	789	7	2	6	29	30	20	30	18	29	29	23	14	12	30	28	29	30	30	21	5	0	16	10	21	27	30	8	22	19	21	25	17
	790	8	3	6	29	30	21	30	19	29	29	24	15	13	30	28	29	30	30	21	5	0	15	11	21	27	30	9	23	20	22	25	18
	791	9	4	6	29	30	22	30	20	29	29	25	16	14	30	28	29	30	30	21	6	0	14	12	21	27	30	10	24	21	23	25	19
	792	10	5	6	29	30	23	30	20	29	29	26	17	15	30	28	29	30	30	21	6	0	13	13	21	27	30	11	25	22	24	25	20
	793	11	6	6	29	30	24	30	21	29	29	27	18	16	30	28	29	30	30	21	7	0	12	14	21	27	30	12	26	23	25	25	21
	794	12	7	6	29	30	25	30	22	29	29	28	19	17	30	28	29	30	30	21	8	0	11	15	21	27	30	13	27	24	26	25	22
	795	13	8	6	29	30	26	30	23	28	29	29	20	18	30	28	29	30	30	20	9	0	11	15	21	27	30	14	28	25	27	25	23
	796	13	9	6	29	30	27	30	24	27	29	30	21	19	30	28	29	30	30	19	10	0	11	16	21	27	30	15	29	26	28	25	24
	797	13	10	6	29	30	28	30	25	26	29	30	22	20	30	28	29	30	30	18	11	0	11	17	20	27	30	16	30	27	29	25	25
	798	13	11	6	29	30	29	30	26	25	29	30	23	21	30	28	29	30	30	17	12	0	11	18	19	27	30	17	30	28	30	25	26
	799	13	12	6	29	30	30	30	27	24	30	30	24	22	30	28	29	30	30	16	12	0	11	19	20	28	30	18	30	29	29	25	27
	800	13	13	6	29	30	30	30	28	23	30	30	25	23	30	28	29	30	30	15	12	0	12	20	21	28	30	19	30	30	28	25	28
	801	13	14	6	29	30	30	30	29	22	30	30	26	24	30	28	29	30	30	14	12	0	13	21	22	28	30	20	30	30	28	26	29
	802	13	15	6	29	30	30	30	29	22	30	30	27	25	30	29	29	30	30	13	12	0	14	22	23	28	30	21	30	30	28	27	30
	803	13	16	6	29	30	30	30	29	22	30	30	28	26	29	30	29	30	30	12	12	0	15	23	24	28	30	22	30	30	28	28	30
	804	13	17	6	29	30	30	30	29	22	30	30	29	27	28	30	29	30	30	11	12	0	16	23	25	28	30	23	30	30	28	29	30
	805	13	18	6	29	30	30	30	29	22	30	30	30	28	27	30	29	30	30	10	12	0	17	23	26	28	30	24	29	30	28	30	30
	806	13	19	6	29	30	30	30	29	22	30	30	30	29	26	30	29	30	30	9	12	0	16	23	27	28	30	25	28	30	28	30	30
	807	13	20	5	29	30	30	30	29	22	30	30	30	30	25	30	30	30	30	8	12	0	15	22	28	29	30	26	27	30	28	30	30
	808	13	21	4	29	30	30	30	29	22	30	30	30	30	24	30	30	30	30	7	12	0	14	22	28	29	30	27	26	30	28	30	30
	809	13	22	3	30	30	30	30	29	22	30	30	30	30	23	30	30	30	30	6	12	0	13	22	28	29	30	28	25	30	28	30	30
	810	13	23	2	30	30	30	30	29	22	30	30	30	30	23	30	30	30	30	5	12	0	12	23	28	29	30	29	24	30	28	30	30
1	811	13	24	1	30	30	30	30	29	22	30	30	30	30	23	30	30	30	30	5	13	0	12	24	28	29	30	30	23	30	28	30	30
	812	13	25	0	30	30	30	30	29	23	30	30	30	30	23	30	30	30	30	5	14	0	13	25	28	29	30	30	22	30	28	30	30
	813	13	26	0	30	30	30	30	29	23	30	30	30	30	23	30	30	30	30	5	15	0	14	26	28	30	30	30	21	30	28	30	30
	814	13	27	0	30	30	30	29	29	23	30	30	30	30	23	30	30	30	30	5	16	0	15	26	28	30	30	30	21	30	28	30	30
	815	14	28	0	30	30	30	29	29	23	30	30	30	30	23	30	30	30	30	5	17	0	16	27	28	30	30	30	21	30	28	30	30
	816	15	29	0	30	30	30	29	29	22	30	30	30	30	23	30	30	30	30	6	17	0	17	27	28	30	30	30	21	30	28	30	30
	817	16	30	0	30	30	30	29	29	21	30	30	30	30	22	30	30	30	30	7	17	0	18	27	28	30	30	30	21	30	28	30	30
	818	16	30	0	30	30	30	29	29	21	30	30	30	30	21	30	30	30	30	8	16	0	19	27	28	30	30	30	21	30	28	30	30
	819	16	30	0	30	30	30	29	29	21	30	30	30	30	20	30	30	30	30	9	15	0	20	27	28	30	30	30	21	30	28	30	30
	820	16	30	0	30	30	30	29	29	21	30	30	30	30	19	30	30	30	30	10	14	0	21	27	28	30	30	30	21	30	28	30	30
	821	15	30	0	30	30	30	29	29	21	30	30	30	30	18	30	30	30	30	11	13	0	22	26	28	30	30	30	21	30	28	30	30
	822	14	30	0	30	30	29	29	30	21	30	30	30	30	17	30	30	30	30	12	13	0	23	25	28	30	30	30	20	30	28	30	30
	823	13	30	0	30	30	28	29	30	21	30	30	30	30	17	30	29	30	30	13	12	0	24	24	28	30	30	30	20	30	28	30	30
	824	12	30	0	30	30	28	29	30	21	30	30	30	30	17	30	29	30	30	14	11	0	25	23	28	30	30	30	20	30	28	30	30
	825	11	30	0	30	30	28	29	30	22	30	30	30	30	17	30	29	30	30	15	10	0	25	23	28	30	29	30	20	30	28	30	30
	826	10	30	0	30	30	28	29	30	22	30	30	30	30	17	30	29	30	30	16	10	0	25	22	28	30	28	30	20	30	28	30	30
	827	9	30	0	30	30	28	29	30	22	30	30	30	30	17	30	29	30	30	17	10	0	25	21	29	30	27	30	20	30	28	30	30
	828	8	30	0	30	30	28	29	30	22	30	30	30	30	17	30	29	30	30	18	10	1	25	20	29	30	26	30	20	30	28	30	30
	829	7	30	0	30	30	28	29	30	22	30	30	30	30	17	30	29	30	30	19	11	2	25	19	28	30	25	30	20	30	29	30	30
	830	6	30	0	30	30	28	29	30	22	30	30	30	30	17	30	29	30	30	20	12	3	25	18	27	30	24	30	20	30	30	30	30
	831	6	30	0	30	30	28	29	30	23	30	30	30	30	17	30	29	30	30	21	13	4	25	17	26	30	23	30	20	30	30	30	30
	832	6	30	0	30	30	28	29	30	23	30	30	30	30	17	30	29	30	30	22	14	5	25	16	25	30	22	30	20	30	30	30	30
	833	6	30	0	30	30	28	29	30	23	30	30	30	30	18	30	29	30	30	23	15	6	25	15	24	30	21	30	20	30	30	30	30
	834	7	30	0	30	30	28	29	30	23	30	30	30	30	19	30	29	30	30	24	16	7	25	14	23	30	20	30	20	30	30	30	30
	835	8	29	0	30	30	28	29	30	23	30	30	30	30	20	30	29	30	30	24	17	8	25	13	22	30	19	30	21	30	30	30	30
	836	9	28	0	30	30	28	29	30	23	30	30	30	30	21	30	29	30	30	24	17	9	26	12	21	30	18	30	22	30	30	30	30
	837	10	27	1	30	30	28	29	30	23	30	30	30	30	22	30	28	30	30	24	17	10	27	12	20	30	17	30	23	30	30	30	30
	838	11	26	2	30	30	28	29	30	23	30	30	30	30	23	30	28	30	30	24	17	11	28	11	19	30	16	30	24	30	30	30	30
	839	12	25	3	30	30	28	29	30	23	30	30	30	30	24	30	28	30	30	24	17	12	29	10	18	30	15	30	25	30	30	30	30
	840	13	24	4	30	30	28	29	29	23	30	30	30	30	24	30	28	30	30	24	18	13	30	9	17	30	14	30	26	30	30	30	30
1	841	14	23	5	30	30	28	29	28	23	30	30	30	30	24	30	28	30	30	23	18	14	30	8	16	30	13	30	27	30	30	30	30
	842	15	22	6	30	30	28	29	27	23	30	30	30	30	24	30	28	30	30	22	18	15	30	7	16	30	12	30	28	30	30	30	30
	843	15	22	7	30	30	28	28	26	23	30	30	30	30	24	30	28	30	30	21	18	16	30	6	16	30	11	30	29	30	30	30	30
	844	15	22	8	30	30	28	29	25	23	30	30	30	30	24	30	28	30	30	20	18	17	30	6	16	30	10	30	29	30	30	30	30
	845	14	22	9	30	30	28	29	24	23	30	30	30	30	24	30	28	30	30	19	18	18	30	5	16	30	9	30	29	30	30	30	30
	846	13	22	10	30	30	28	29	23	24	30	30	30	30	24	30	28	30	30	18	18	19	30	4	16	30	8	30	29	30	30	30	30
	847	12	22	11	30	30	28	29	22	25	30	30	30	30	25	30	28	30	30	17	18	20	30	3	16	30	7	30	28	30	30	30	30
	848	11	22	12	30	30	28	29	21	25	30	30	30	30	26	30	28	30	30	16	18	21	30	2	16	30	6	30	27	30	30	30	30
	849	10	22	13	30	30	28	29	20	24	30	30	30	30	27	30	28	30	30	15	18	22	30	1	16	30	5	30	26	30	30	30	30
	850	9	22	14	30	30	28	29	19	23	30	30	30	30	28	30	28	30	30	14	18	23	30	0	16	30	4	30	25	30	30	30	30
	851	9	22	15	30	30	28	29	18	22	30	30	30	30	29	30	28	30	30	13	18	24	30	0	16	30	4	30	24	30	30	30	30
	852	9	22	16	30	30	29	29	17	21	30	30	30	30	30	30	28	30	30	12	18	25	30	0	16	30	4	30	25	30	30	30	30
	853	9	22	17	30	30	30	29	16	20	30	30	30	30	29	30	29	30	30	11	18	26	30	0	16	30	4	30	25	30	30	30	30
	854	9	22	18	30	30	30	29	15	19	30	30	30	30	28	30	29	30	30	10	18	27	30	0	16	30	4	30	25	30	30	30	30
	855	9	22	19	30	30	30	29	14	18	30	30	30	30	27	30	29	30	30	9	18	28	29	0	16	30	5	30	25	30	30	30	30
	856	9	22	20	30	30	30	29	13	18	30	30	30	30	26	30	28	30	30	8	17	29	29	0	16	30	5	30	25	30	30	30	30
	857	9	22	21	30	30	30	29	12	18	30	30	30	30	25	30	28	30	30	7	16	30	29	0	16	30	5	30	25	30	30	29	30
	858	9	22	22	30	30	29	29	11	18	30	30	30	30	24	30	28	30	30	6	15	30	29	0	17	30	5	30	25	30	30	28	30
	859	9	22	23	30	30	29	29	10	18	30	30	30	30	24	30	28	30	30	5	15	30	29	0	18	30	5	30	24	30	30	27	30
	860	9	22	24	30	30	29	29	9	18	30	30	30	30	24	30	28	30	30	4	15	30	29	0	19	30	5	30	24	30	30	26	30
	861	9	22	25	30	30	29	29	8	17	30	30	30	30	24	30	28	30	30	3	15	30	29	0	20	30	5	30	24	30	30	25	30
	862	9	22	26	30	30	29	29	7	16	30	30	30	30	24	30	28	30	30	2	15	30	29	0	21	30	5	30	24	30	30	24	30
	863	9	22	27	30	30	29	29	6	15	30	30	30	30	24	30	28	30	30	1	15	30	29	0	22	30	5	30	24	30	30	23	30
	864	8	22	28	30	30	29	29	5	14	30	30	30	30	24	30	28	30	30	0	15	30	29	0	23	30	5	30	24	30	30	22	30
	865	7	23	29	30	30	29	29	4	13	30	30	30	30	24	30	28	30	30	0	15	30	29	0	24	30	6	30	24	30	30	21	30
	866	6	24	30	30	30	29	29	3	12	30	30	30	30	24	30	28	30	30	0	16	30	29	0	25	30	7	30	24	30	30	20	30
	867	5	25	30	29	30	29	29	2	11	30	30	30	30	24	30	29	30	30	0	17	30	29	0	26	30	8	30	24	30	30	19	30
	868	4	26	30	29	30	29	29	1	10	30	30	30	30	23	30	29	30	30	0	18	30	29	0	26	30	9	30	24	30	30	19	30
	869	3	27	29	29	30	29	29	1	9	30	30	30	30	22	30	29	30	30	0	19	30	29	0	26	30	10	30	24	30	30	19	30
	870	2	28	28	29	30	29	29	2	8	30	30	30	30	21	30	29	30	30	0	19	30	29	0	26	30	11	30	24	30	30	19	30
1	871	2	29	27	29	30	29	29	3	7	30	30	30	30	20	30	29	30	30	0	19	30	29	0	26	30	11	30	24	30	30	19	30
	872	2	30	26	29	30	29	29	4	6	30	30	30	30	20	30	29	30	30	0	19	29	29	0	25	30	11	30	24	30	30	19	30
	873	3	30	25	29	30	29	30	5	5	30	30	30	30	20	30	29	30	30	0	19	28	29	0	24	30	11	30	24	30	30	18	30
	874	4	30	24	29	30	29	30	6	4	30	30	30	30	20	30	29	30	30	0	19	27	29	0	23	30	11	30	24	30	29	17	30
	875	5	30	23	29	30	29	30	7	3	30	30	30	30	20	30	29	30	30	0	19	26	29	0	22	30	11	30	24	30	29	16	30
	876	6	30	22	29	30	29	30	7	2	30	30	30	30	20	30	29	30	30	0	19	25	29	0	22	30	11	30	24	30	29	15	30
	877	7	30	21	29	30	29	30	7	1	30	30	30	30	20	30	29	30	30	0	18	24	29	0	22	30	11	30	25	30	29	14	30
	878	8	30	20	29	30	29	30	7	0	30	30	30	30	20	30	29	30	30	0	18	23	29	1	22	30	11	30	26	30	29	13	30
	879	9	30	19	29	30	29	30	7	1	30	30	30	30	20	30	29	30	30	0	18	22	29	2	22	30	11	30	27	30	29	12	30
	880	10	30	18	29	30	29	29	7	2	30	30	30	30	20	30	29	30	30	0	18	21	29	3	22	30	11	30	28	30	29	11	30
	881	11	30	17	29	30	29	28	7	3	30	30	30	30	20	30	29	30	30	0	18	20	29	4	22	30	10	30	29	30	29	10	30
	882	12	30	16	29	30	29	27	7	4	30	30	30	30	20	30	29	30	30	0	18	20	29	5	21	30	9	30	29	30	29	9	30
	883	13	30	15	29	30	29	26	7	5	30	30	30	30	21	30	29	30	30	0	18	20	29	6	20	30	8	30	28	30	29	8	30
	884	14	30	14	29	30	29	26	8	6	30	30	30	30	22	30	29	30	30	0	18	20	29	7	19	30	7	30	28	30	29	7	30
	885	15	30	13	29	30	29	26	9	7	30	30	30	30	23	30	29	30	30	0	18	20	30	8	18	30	6	30	28	30	29	6	30
	886	16	30	12	29	30	29	26	10	8	30	30	30	30	24	30	30	30	30	0	18	20	30	9	17	30	6	30	28	30	29	6	30
	887	17	30	11	29	30	29	26	11	9	30	30	30	30	24	30	30	30	30	0	18	20	30	10	16	30	6	30	28	30	29	7	30
	888	18	30	10	29	30	30	26	12	10	30	30	30	30	24	30	30	30	30	1	18	20	30	11	15	30	7	30	28	30	29	8	30
	889	19	30	9	29	30	30	25	12	11	30	30	30	30	23	30	30	30	30	2	17	20	30	12	14	30	8	30	29	30	29	9	30
	890	20	30	8	29	30	30	25	12	12	30	30	30	30	22	30	30	30	30	3	16	20	30	13	13	30	9	30	28	30	29	10	30
	891	21	30	7	29	30	30	25	12	13	30	30	30	30	21	29	30	30	30	4	15	20	29	14	12	30	10	30	27	30	29	11	30
	892	22	30	6	29	30	30	25	12	14	30	30	30	30	21	28	30	30	30	5	14	20	28	15	11	30	11	30	26	30	29	12	30
	893	23	30	5	29	30	30	25	12	15	30	30	30	30	21	27	30	30	30	6	14	20	27	16	10	30	12	30	25	30	29	12	30
	894	24	30	4	29	30	30	25	12	16	30	30	30	30	21	26	30	30	30	7	14	20	26	17	9	30	13	30	24	30	29	12	30
	895	25	30	3	29	30	30	25	12	17	30	30	30	30	21	25	30	30	30	7	14	20	25	18	8	30	13	30	23	30	29	12	30
	896	26	30	2	29	30	30	25	12	18	30	30	30	30	21	24	30	30	30	7	14	20	24	19	7	30	13	30	22	30	29	12	30
	897	27	30	1	30	30	30	25	12	19	30	30	30	30	21	24	30	30	30	7	14	20	23	20	6	30	13	30	21	30	29	12	30
	898	27	30	0	30	30	30	25	12	20	30	30	30	30	22	24	30	30	30	7	13	20	22	21	6	30	13	30	20	30	29	11	30
	899	27	30	0	30	30	30	25	11	21	30	30	30	30	23	24	30	30	30	7	12	20	21	22	6	30	13	30	19	30	29	10	30
	900	27	30	0	30	30	30	25	10	21	30	30	30	30	24	24	30	30	30	7	12	20	20	23	6	30	13	30	18	30	29	9	30
1	901	26	30	0	30	30	30	25	9	21	30	30	30	30	25	24	30	30	30	7	12	19	19	24	6	30	14	30	17	30	29	8	30
	902	25	30	0	30	30	30	25	8	22	30	30	30	30	25	24	30	30	30	7	12	19	18	25	6	30	15	30	17	30	29	7	30
	903	24	30	0	30	30	30	25	8	23	30	30	30	30	25	24	30	30	30	7	12	20	17	26	6	30	16	30	17	30	29	7	30
	904	23	30	0	30	30	30	25	8	24	30	30	30	30	25	24	30	30	30	7	12	21	17	27	6	30	17	30	17	30	30	7	30
	905	22	30	0	30	30	30	25	8	25	30	30	30	30	25	24	30	30	30	7	12	22	17	28	6	30	18	30	17	30	30	7	30
	906	21	30	0	30	30	30	25	9	26	30	30	30	30	25	24	30	30	30	7	12	23	17	29	5	30	19	30	17	30	30	7	30
	907	20	30	0	30	30	30	25	10	27	30	30	30	30	25	24	30	29	30	7	13	24	17	30	4	30	20	30	17	30	30	7	30
	908	19	30	0	30	30	30	25	11	28	30	30	30	30	25	24	30	29	30	7	14	24	17	30	3	30	21	30	17	30	30	7	30
	909	18	30	0	30	30	30	25	12	28	30	30	30	30	25	24	30	29	30	7	15	24	17	30	2	30	21	30	17	30	30	7	30
	910	17	30	0	30	30	30	26	13	28	30	30	30	30	25	24	30	29	30	8	16	24	17	30	1	30	21	30	17	30	30	7	30
	911	16	30	0	30	30	30	27	14	28	30	30	30	30	25	24	30	29	30	9	17	24	17	30	0	30	21	30	17	30	30	7	30
	912	15	30	0	30	30	30	28	15	28	30	30	30	30	25	24	30	29	30	10	18	23	17	30	0	30	21	30	17	30	30	7	29
	913	14	30	0	30	30	30	29	16	28	30	30	30	30	25	24	30	29	30	11	19	22	17	30	0	30	21	30	18	30	30	7	28
	914	13	30	0	30	30	30	29	16	28	30	30	30	30	25	24	30	29	30	12	19	22	17	30	0	30	21	30	18	30	30	8	28
	915	12	30	0	30	30	30	29	16	28	30	30	30	30	25	24	30	29	30	13	19	22	17	30	0	30	21	30	18	30	30	9	28
	916	11	30	0	30	30	30	29	16	28	30	30	30	30	25	24	30	29	30	14	19	22	17	29	0	30	21	30	18	30	30	9	28
	917	10	30	0	30	30	30	29	16	28	30	30	30	30	26	24	30	29	30	15	19	22	17	28	0	30	21	30	18	30	30	9	28
	918	9	30	0	30	30	30	29	16	28	30	30	30	30	27	24	30	29	30	15	19	22	17	27	0	30	20	30	18	30	30	9	28
	919	8	30	1	30	30	30	30	17	28	30	30	30	30	28	24	30	29	30	15	19	22	17	26	0	30	19	30	18	30	30	9	28
	920	7	30	2	30	30	30	30	18	28	30	30	30	30	29	24	30	29	30	15	19	22	17	25	1	30	18	30	19	30	30	9	28
	921	6	30	3	30	30	30	30	18	28	30	30	30	30	30	25	30	29	30	15	19	22	18	24	2	30	17	30	20	30	30	9	28
	922	5	30	4	30	30	30	30	18	28	30	30	30	30	30	26	30	29	30	15	19	22	19	23	3	30	16	30	21	30	30	9	28
	923	4	30	5	30	30	30	30	18	28	30	30	30	30	30	27	29	29	30	15	18	22	20	22	4	30	15	30	22	30	30	10	28
	924	3	30	6	30	30	30	30	18	28	30	30	30	30	30	28	28	29	30	15	18	22	21	21	5	30	14	30	23	30	29	11	28
	925	2	30	7	30	30	30	30	18	28	30	30	30	30	30	29	27	29	30	16	18	22	22	20	6	30	13	30	24	30	28	12	28
	926	1	30	8	30	30	30	30	18	28	30	30	30	30	30	30	27	29	30	17	18	22	23	19	7	30	12	30	25	30	27	13	28
	927	0	30	9	30	30	30	30	18	27	30	30	30	30	30	30	27	29	30	18	18	22	24	18	8	30	11	30	26	30	26	14	28
	928	0	30	9	30	30	30	30	18	26	29	30	30	30	30	30	27	29	30	18	19	21	25	17	9	30	10	30	27	30	25	15	28
	929	0	30	9	30	30	30	30	18	25	29	30	30	30	30	30	27	29	30	18	20	20	26	16	10	30	9	30	28	30	24	16	28
	930	0	30	9	30	30	29	30	18	25	29	30	30	30	30	30	27	29	30	19	20	19	27	15	11	30	8	30	29	30	23	17	28
1	931	1	30	9	30	30	28	30	18	25	29	30	30	30	30	30	27	29	30	20	20	19	28	15	12	30	7	30	30	30	22	18	28
	932	2	30	9	30	30	27	30	19	24	29	30	30	30	30	30	27	29	30	21	20	19	29	15	12	30	6	30	30	30	21	19	28
	933	3	30	9	30	30	26	30	19	23	29	30	30	30	30	30	27	29	30	22	20	18	30	15	13	30	5	30	30	30	20	20	28
	934	4	30	9	30	30	25	30	19	22	29	30	30	30	30	30	27	29	30	23	20	17	30	15	14	30	4	30	30	30	19	21	28
	935	5	30	9	30	30	24	29	19	21	29	30	30	30	30	30	27	29	30	24	20	16	29	15	15	30	3	30	30	30	18	22	28
	936	6	30	9	30	30	24	28	19	20	29	30	30	30	30	30	27	29	30	25	20	15	28	15	16	30	3	30	29	30	17	23	28
	937	7	30	9	30	30	24	27	19	19	29	30	30	30	30	30	27	30	30	26	20	14	27	15	17	30	3	30	28	30	16	24	28
	938	8	30	9	30	30	24	26	18	18	29	30	30	30	30	30	27	30	30	26	20	14	26	15	18	30	3	30	27	30	15	25	28
	939	9	30	9	30	30	24	25	17	17	29	30	30	30	30	30	27	30	30	26	20	14	25	15	19	30	4	30	26	30	14	25	28
	940	10	29	10	30	30	24	24	16	16	29	30	30	30	30	30	27	30	30	25	20	14	24	15	20	30	5	30	25	30	13	25	28
	941	11	28	11	30	30	24	23	15	15	28	30	30	30	30	30	27	30	30	24	20	14	23	15	20	30	5	29	24	30	12	25	28
	942	12	27	12	30	30	24	23	14	14	27	30	30	30	30	30	27	30	30	23	20	14	22	15	20	30	5	28	23	30	11	25	29
	943	13	26	13	30	30	24	23	13	13	26	30	30	30	30	30	27	30	30	22	20	14	21	15	20	30	6	27	22	30	10	25	30
	944	14	26	14	30	30	24	23	12	12	26	30	30	30	30	30	27	30	30	21	21	13	21	15	20	30	7	26	21	30	9	24	30
	945	15	26	15	30	30	24	23	12	11	26	30	30	30	30	30	27	30	30	20	22	12	21	15	20	30	8	26	21	30	8	23	30
	946	16	26	16	30	30	24	23	12	10	26	30	30	30	30	30	27	30	30	20	23	11	21	15	20	30	9	26	21	30	7	22	30
	947	17	26	17	30	30	24	23	12	9	26	30	30	30	30	30	27	30	30	20	24	10	21	15	20	30	10	26	21	30	6	21	30
	948	18	26	17	30	30	24	23	12	8	26	30	30	30	30	30	27	30	30	20	25	9	21	15	20	30	11	26	21	30	6	20	30
	949	19	26	16	30	30	24	23	12	7	26	30	30	30	30	30	27	30	30	20	26	8	21	15	20	30	12	26	21	30	6	19	30
	950	19	26	16	30	30	24	23	12	6	26	30	30	30	30	30	27	30	30	20	26	7	21	15	19	30	13	26	21	30	6	18	30
	951	19	26	16	30	30	24	23	13	5	26	30	30	30	30	30	27	30	30	20	26	6	21	15	18	30	14	26	21	30	6	17	30
	952	19	26	16	30	30	24	23	14	4	26	30	30	30	30	30	27	30	30	20	26	5	21	15	17	30	15	26	21	30	6	16	30
	953	19	26	16	30	30	24	23	15	3	26	30	30	30	30	30	28	30	30	20	26	4	21	15	16	30	16	26	21	30	5	15	30
	954	19	26	16	30	30	24	23	16	2	26	30	30	30	30	30	29	30	30	20	25	3	21	15	15	30	17	26	21	30	5	14	30
	955	19	26	16	30	30	24	23	17	1	26	30	30	30	29	30	30	30	30	20	24	2	21	15	14	30	18	26	21	30	5	13	30
	956	19	26	16	30	30	24	23	18	0	26	30	30	30	28	30	30	30	30	20	23	1	21	15	13	30	19	26	21	30	5	12	30
	957	19	26	16	30	30	24	23	19	0	26	30	30	30	27	30	30	29	30	20	22	0	21	15	12	30	20	26	21	30	5	12	30
	958	19	26	17	30	30	24	23	20	0	27	30	30	30	27	30	30	28	30	21	21	0	21	15	12	30	21	26	21	30	5	12	30
	959	19	26	18	30	30	24	23	21	0	27	30	30	30	27	30	30	27	30	22	20	0	21	15	12	30	22	26	21	30	6	12	30
	960	19	26	19	30	30	25	23	21	0	27	30	30	30	27	30	30	27	30	22	19	0	21	15	12	30	23	26	21	30	7	12	30
1	961	18	26	20	30	30	26	23	21	0	27	30	30	30	27	30	30	27	30	22	18	0	21	14	12	30	24	26	21	30	8	12	30
	962	17	26	21	30	30	27	23	20	0	27	30	30	30	27	30	30	27	30	22	17	0	21	13	13	30	25	26	21	30	9	12	30
	963	16	26	21	30	30	28	23	19	0	27	30	30	30	27	30	30	27	30	22	16	0	21	12	13	30	26	26	21	30	10	12	30
	964	15	26	21	30	30	29	23	18	0	27	30	30	30	27	30	30	27	30	22	16	0	21	11	13	30	27	26	21	30	11	12	30
	965	14	26	22	30	30	30	23	17	0	27	30	30	30	27	30	30	27	30	22	16	0	22	10	13	30	27	26	21	30	11	12	30
	966	13	26	23	30	30	30	23	16	0	27	30	30	30	27	30	30	27	30	22	16	0	23	9	13	30	26	25	22	30	12	12	30
	967	12	26	24	30	30	30	24	16	1	27	30	30	30	27	30	30	27	30	22	16	1	24	8	13	30	26	24	23	30	13	12	30
	968	11	26	25	30	30	30	25	17	2	27	30	30	30	27	30	30	27	30	23	16	2	25	7	13	30	26	23	24	30	14	12	30
	969	10	26	26	30	30	30	26	18	3	27	30	30	30	27	30	30	27	30	24	16	3	26	6	13	30	26	22	25	30	15	13	30
	970	9	27	26	30	30	30	27	19	4	27	30	30	30	27	30	30	27	30	25	16	4	27	6	12	30	26	22	26	30	16	14	30
	971	9	28	26	30	30	30	28	20	5	28	30	30	30	27	30	30	27	30	26	16	5	28	6	13	30	27	23	27	30	17	15	30
	972	9	29	26	30	30	30	28	21	6	29	30	30	30	27	30	30	27	30	27	16	6	29	6	14	30	28	24	28	30	18	16	30
	973	9	30	26	30	30	30	28	22	7	30	30	30	30	27	30	30	27	30	28	16	6	30	6	15	30	28	25	29	30	19	17	30
	974	9	30	26	30	30	30	28	23	8	30	30	30	30	27	30	30	27	30	29	16	6	30	6	16	30	28	26	30	30	19	18	30
	975	9	30	26	30	30	30	28	23	9	30	30	30	30	27	30	30	26	30	30	16	6	30	6	17	30	28	26	30	30	20	19	30
	976	9	30	26	30	30	30	28	23	10	30	30	30	30	27	30	30	26	30	30	16	6	30	7	17	30	28	26	30	30	21	20	30
	977	9	30	26	30	30	29	27	23	11	29	30	30	30	27	30	30	26	30	30	16	6	30	8	17	30	28	26	30	30	22	21	30
	978	9	30	27	30	30	28	27	23	12	28	30	30	30	27	30	30	26	30	30	16	6	30	9	18	30	28	26	30	30	22	22	30
	979	8	30	28	30	30	28	27	23	13	27	30	30	30	27	30	30	26	30	30	16	6	30	10	19	30	28	26	30	30	22	23	30
	980	8	30	27	30	30	28	27	23	14	26	30	30	30	27	30	30	26	30	30	17	7	30	11	20	30	28	26	30	30	22	24	30
	981	8	30	26	30	30	28	27	23	15	26	30	30	30	27	30	30	26	30	30	18	8	30	12	21	30	28	26	29	30	22	25	30
	982	8	30	25	30	30	28	27	23	16	26	30	30	30	27	30	30	26	30	30	19	9	30	13	22	30	28	26	29	30	22	26	30
	983	8	30	24	30	30	28	27	23	17	26	30	30	30	27	30	30	26	30	30	20	10	30	14	23	30	28	26	29	30	22	27	30
	984	8	30	23	30	30	28	27	22	18	26	30	30	30	27	30	30	26	30	30	21	11	30	15	23	30	28	26	29	30	23	28	30
	985	8	30	22	30	30	28	27	21	19	26	30	30	30	28	30	30	26	30	30	22	12	30	16	24	30	28	26	29	30	24	29	30
	986	8	30	21	30	30	28	27	20	20	26	30	30	30	29	30	30	26	30	30	23	13	30	17	25	30	28	26	29	30	25	30	30
	987	8	30	20	30	30	28	27	19	21	26	30	30	30	30	30	30	27	30	30	24	14	30	18	26	30	28	26	29	30	26	30	30
	988	8	30	19	30	30	28	27	18	22	26	30	30	30	30	30	30	28	30	30	25	15	30	19	26	30	28	26	29	30	27	30	30
	989	8	30	18	30	30	28	27	17	23	26	30	30	30	30	30	30	29	30	30	26	16	30	20	26	30	28	26	29	30	27	29	30
	990	8	30	17	30	30	28	27	17	24	26	30	30	30	30	30	30	29	30	30	26	17	30	21	26	30	27	26	29	30	27	28	30
1	991	8	30	16	30	30	28	27	17	25	26	30	30	30	30	30	30	29	30	30	26	18	30	22	26	30	26	26	29	30	27	27	30
	992	8	30	15	30	30	28	27	17	26	26	30	30	30	30	30	30	29	30	30	26	19	30	23	26	30	25	26	29	30	27	26	30
	993	8	30	15	30	30	28	27	17	27	26	30	30	30	30	30	30	29	30	30	26	20	30	24	25	30	24	26	29	30	27	25	30
	994	8	30	15	30	30	28	27	17	28	26	30	30	30	30	30	30	29	30	30	25	21	30	25	24	30	23	26	29	30	27	24	30
	995	8	30	14	30	30	28	28	17	29	26	30	30	30	30	30	30	29	30	30	24	22	30	26	23	30	23	26	29	30	28	24	30
	996	8	30	13	30	30	28	29	17	30	26	30	30	30	30	30	30	29	30	30	23	23	30	27	22	30	23	27	29	30	28	24	30
	997	8	30	12	30	30	28	29	16	30	26	30	30	30	30	30	30	29	30	30	22	23	30	28	21	30	22	28	29	30	28	24	30
	998	9	30	11	30	30	28	29	15	30	26	30	30	30	30	30	30	29	30	30	21	23	30	29	20	30	21	29	29	30	28	24	30
	999	10	30	10	30	30	28	29	14	30	26	30	30	30	30	30	30	29	30	30	20	23	30	30	19	30	20	30	29	30	28	24	30
	1000	11	30	9	30	30	28	29	13	30	26	30	30	30	30	30	30	29	30	30	19	22	30	30	19	30	19	30	29	30	28	24	30
	1001	11	30	8	30	30	28	29	12	30	26	30	30	30	30	30	30	29	30	30	18	21	30	30	18	30	18	30	29	30	28	24	30
	1002	11	30	7	30	30	28	29	12	30	26	30	30	30	30	30	30	29	30	30	17	20	30	30	17	30	17	30	29	30	28	24	30
	1003	11	30	6	30	30	28	29	12	30	26	30	30	30	30	30	30	29	30	30	16	20	30	30	16	30	16	30	29	30	28	24	30
	1004	11	30	6	30	30	28	29	12	30	26	30	30	30	30	30	30	29	30	30	15	20	30	30	15	30	16	30	29	30	29	24	30
	1005	11	30	6	30	30	28	29	12	30	26	30	30	30	30	30	30	30	30	30	14	20	30	30	14	30	16	30	29	30	29	24	30
	1006	11	30	6	30	30	28	29	12	30	26	30	30	30	30	30	30	30	30	30	14	20	30	30	14	30	16	30	29	30	29	24	30
	1007	11	30	6	30	30	29	30	12	30	27	30	30	30	30	30	30	30	30	30	14	20	30	30	15	29	16	30	29	30	29	24	30
	1008	11	30	6	30	30	30	30	12	30	28	30	30	30	30	30	30	30	30	30	14	20	30	30	15	28	16	30	29	30	29	24	30
	1009	12	30	6	30	30	30	30	12	30	29	30	30	30	30	30	30	30	30	30	14	20	30	30	15	28	16	30	29	30	29	24	30
	1010	13	30	7	30	30	30	30	12	30	30	30	30	30	30	30	30	30	30	30	14	19	30	30	15	28	16	30	29	30	29	24	30
	1011	14	30	8	30	30	30	30	12	30	30	30	30	30	30	30	30	30	30	30	14	18	30	30	15	28	16	30	30	30	29	24	30
	1012	15	30	9	30	30	30	30	12	30	30	30	30	30	30	30	30	30	30	30	14	17	30	30	15	28	16	30	30	30	29	24	30
	1013	16	30	10	30	30	30	30	12	30	30	30	30	30	30	30	30	30	30	30	14	16	30	30	15	28	16	30	30	30	30	24	30
	1014	17	30	11	30	30	30	30	13	30	29	30	30	30	30	30	30	30	30	30	14	15	30	30	15	28	16	30	30	30	30	24	30
	1015	18	29	12	30	30	30	30	14	30	28	30	30	30	30	30	30	30	29	30	14	14	30	30	14	27	16	30	30	30	30	24	30
	1016	19	28	13	30	30	30	30	15	30	27	30	30	30	30	30	30	30	28	30	14	13	30	30	13	26	16	30	30	30	30	24	30
	1017	19	27	14	30	30	29	30	16	30	26	29	30	30	30	30	30	30	27	30	14	12	30	30	12	25	16	30	30	30	30	24	30
	1018	19	26	15	30	30	28	30	17	30	25	29	30	30	30	30	29	30	26	30	14	11	30	30	11	24	16	30	30	30	30	24	30
	1019	19	25	16	30	30	27	30	17	30	24	29	30	30	30	30	29	30	25	30	14	10	30	30	11	23	16	29	30	30	30	25	30
	1020	19	24	17	30	30	26	30	17	30	23	29	30	30	30	30	29	30	24	30	15	9	30	30	11	22	17	28	30	30	30	26	30
1	1021	19	23	18	30	30	25	30	17	30	23	29	30	30	30	30	29	30	24	30	16	8	30	30	11	21	18	27	30	30	30	27	30
	1022	19	22	19	30	30	25	30	17	30	23	29	30	30	30	30	29	30	24	30	17	7	30	30	11	21	19	26	30	30	30	28	30
	1023	19	21	20	30	30	25	30	17	30	23	29	30	30	30	30	29	30	24	30	18	6	30	30	12	21	20	25	29	30	30	29	30
	1024	19	20	21	30	30	25	30	17	30	23	29	30	30	30	30	29	30	24	30	19	5	30	30	13	21	21	24	28	30	30	30	30
	1025	19	19	21	30	30	25	30	17	30	23	29	30	30	30	30	28	30	24	30	20	4	30	30	13	21	22	23	27	30	30	30	30
	1026	19	18	21	30	30	25	29	17	30	23	29	30	30	30	30	28	30	24	30	21	3	30	30	14	21	23	22	26	30	30	30	30
	1027	19	17	21	30	30	25	28	17	30	23	29	30	30	30	30	28	30	24	30	22	2	30	30	15	21	24	21	25	30	30	30	30
	1028	18	16	21	30	30	25	27	17	30	23	29	30	30	30	30	28	30	24	30	23	1	30	30	16	21	25	20	24	30	30	30	30
	1029	17	15	21	30	30	25	27	17	30	23	29	30	30	30	30	28	30	24	30	24	0	30	30	17	21	26	19	23	30	30	30	30
	1030	16	14	21	30	30	25	27	17	30	23	29	30	30	30	29	28	30	24	30	25	0	30	30	18	21	27	18	22	30	30	30	30
	1031	15	13	21	30	30	25	27	17	30	22	29	30	30	30	28	28	30	24	30	26	0	30	30	19	21	28	17	21	30	30	30	30
	1032	14	12	21	30	30	25	27	17	30	21	29	30	30	30	27	28	30	24	30	27	0	30	30	20	21	29	16	20	30	30	30	30
	1033	13	11	21	30	30	25	27	17	30	20	29	30	30	30	26	28	30	24	30	28	0	30	29	21	21	30	15	20	30	30	30	30
	1034	12	10	20	30	30	25	26	17	30	19	29	30	30	30	26	28	29	24	30	29	0	30	28	22	21	30	14	20	30	30	30	30
	1035	11	9	19	30	30	25	25	17	30	18	29	30	30	30	26	28	29	24	30	30	0	30	27	23	21	30	13	20	30	30	30	30
	1036	10	9	18	30	30	25	24	17	30	17	29	30	30	30	26	28	29	24	30	30	0	30	26	24	21	30	12	20	30	30	30	30
	1037	9	9	17	30	30	25	24	17	30	16	29	30	30	30	26	28	29	24	30	30	0	30	25	24	22	30	11	20	30	30	30	30
	1038	8	9	16	30	30	25	24	17	30	15	29	30	30	30	26	27	29	24	30	30	0	30	24	24	23	30	10	20	30	30	30	30
	1039	7	9	15	30	30	25	24	17	30	14	29	30	30	30	26	27	29	24	30	30	0	30	23	24	23	30	9	20	30	30	30	30
	1040	6	9	15	30	30	25	24	17	30	13	29	30	30	30	26	27	29	24	30	30	0	30	22	24	23	30	8	20	30	30	30	30
	1041	5	9	15	30	30	25	24	17	30	12	29	30	30	30	26	27	29	24	30	30	0	30	21	24	23	30	7	20	30	30	30	30
	1042	4	9	15	30	30	25	24	17	30	11	29	30	30	30	26	27	29	24	30	30	0	30	20	24	23	30	6	20	30	30	30	30
	1043	3	9	15	30	30	25	24	17	30	10	29	30	30	30	26	27	28	24	30	30	0	30	19	24	23	30	5	20	30	30	29	30
	1044	3	9	15	30	30	25	24	17	30	10	29	30	30	30	26	27	27	24	30	30	0	30	18	25	23	30	4	20	30	30	28	30
	1045	3	10	14	30	30	25	24	17	30	10	29	30	30	30	26	26	26	25	30	30	0	30	17	26	24	30	3	20	30	30	27	30
	1046	3	11	14	30	30	25	24	17	30	10	29	30	30	30	26	25	25	26	30	30	0	30	16	27	25	30	2	20	30	30	26	30
	1047	4	12	14	30	30	26	24	17	30	10	30	30	30	30	26	24	24	27	30	30	0	30	15	28	26	30	1	20	30	30	25	30
	1048	5	13	14	30	30	27	24	17	30	10	30	30	30	30	26	24	24	28	30	30	0	30	14	29	27	30	0	20	30	30	24	30
	1049	6	14	14	30	30	28	24	18	30	10	30	30	30	30	26	23	24	29	30	30	0	30	13	29	28	29	0	20	30	30	24	29
	1050	7	15	14	30	30	29	24	19	30	10	30	30	30	30	26	23	24	30	30	30	0	30	12	29	29	28	0	20	30	30	24	28
1	1051	7	16	14	30	30	30	24	20	30	9	30	30	30	30	26	23	24	30	30	30	0	30	11	29	30	27	0	20	30	30	24	27
	1052	7	17	14	30	30	30	24	21	30	8	30	30	30	30	26	23	24	30	30	30	0	30	10	29	30	26	0	20	30	30	24	26
	1053	7	18	14	30	30	30	24	22	30	7	30	30	30	30	26	23	24	30	30	29	0	30	9	29	30	25	0	21	30	30	24	25
	1054	7	19	14	30	30	30	24	23	30	6	30	30	30	30	26	23	24	30	30	29	0	30	8	29	30	24	0	22	30	30	24	24
	1055	7	20	15	30	30	30	24	24	30	5	30	30	30	30	26	24	24	30	30	29	0	30	7	30	30	23	0	23	30	30	24	23
	1056	8	21	16	30	30	30	25	25	30	4	30	30	30	30	26	24	24	30	30	29	0	30	6	30	30	22	0	24	30	30	24	22
	1057	9	22	17	30	30	30	26	26	30	3	30	30	30	30	26	24	24	30	30	29	0	30	5	30	30	22	0	25	30	30	24	21
	1058	10	23	18	30	30	30	27	27	30	2	30	30	30	30	26	24	24	30	30	29	0	29	4	30	30	22	0	26	30	30	24	20
	1059	11	24	19	30	30	29	27	28	30	1	30	30	30	30	26	24	24	30	30	29	0	28	4	30	30	22	0	27	30	30	24	19
	1060	12	25	19	30	30	28	27	29	30	0	30	30	30	30	27	24	24	30	30	29	0	28	4	30	30	22	0	28	30	30	24	18
	1061	13	26	19	30	30	28	27	30	30	0	29	30	30	30	28	24	24	30	30	29	0	28	4	30	29	22	0	29	30	30	24	17
	1062	14	27	19	30	30	28	27	30	30	0	28	30	30	30	29	23	24	30	30	29	0	28	4	30	28	22	0	30	30	30	24	16
	1063	15	28	19	30	30	28	27	30	30	0	27	30	30	30	30	22	24	30	30	29	0	28	5	30	27	22	0	30	30	30	24	16
	1064	16	29	19	30	30	28	28	30	30	0	26	30	30	30	30	21	25	30	30	29	0	28	6	30	27	22	0	30	30	30	24	16
	1065	17	30	19	30	30	28	29	30	30	0	25	30	30	30	30	20	25	30	30	29	0	28	7	30	27	22	0	30	30	30	24	16
	1066	18	30	19	30	30	28	30	30	30	0	24	30	30	30	30	19	25	30	30	29	0	28	7	30	27	22	0	30	30	30	24	16
	1067	18	30	19	30	30	28	30	30	30	0	23	30	30	30	30	19	25	30	30	29	0	28	7	30	27	22	0	30	30	30	24	16
	1068	18	30	19	30	30	28	30	30	30	0	22	30	30	30	30	20	25	30	30	29	1	28	7	30	27	22	1	30	30	30	24	16
	1069	18	30	19	30	30	28	30	30	30	0	21	30	30	30	30	20	25	30	30	29	2	28	7	30	27	22	2	30	30	30	24	16
	1070	19	30	18	30	30	28	30	30	30	1	20	30	30	30	30	20	25	30	30	29	3	28	7	30	27	22	3	30	30	30	24	16
	1071	20	30	17	30	30	28	29	30	30	2	19	30	30	30	30	20	25	30	30	29	4	28	7	30	27	21	4	30	30	30	24	16
	1072	21	30	16	30	30	28	28	30	30	3	19	30	30	30	30	20	25	29	30	29	5	28	7	30	27	20	5	30	30	30	24	16
	1073	22	30	15	30	30	28	27	29	30	4	19	30	30	30	30	20	26	28	30	29	6	28	7	30	27	19	6	30	30	30	25	16
	1074	22	30	14	30	30	28	26	28	30	5	19	30	30	30	30	20	27	27	30	29	7	28	7	30	27	18	7	30	30	30	26	16
	1075	22	30	14	30	30	28	25	27	30	6	19	30	30	30	30	21	28	26	30	29	8	28	7	30	27	17	8	30	30	30	27	16
	1076	22	30	13	30	30	28	24	27	30	7	19	30	30	30	30	22	29	25	30	29	9	28	7	30	27	16	9	30	30	30	28	16
	1077	22	30	12	30	30	28	24	27	30	8	19	30	30	30	30	23	30	24	30	29	10	28	7	30	27	16	10	30	30	30	29	16
	1078	22	30	11	30	30	28	24	27	30	9	19	30	30	30	30	24	30	23	30	29	11	28	7	30	27	16	10	30	30	30	30	16
	1079	22	30	10	30	30	28	24	27	30	10	19	30	30	30	30	25	30	22	30	29	12	28	7	30	27	17	10	30	30	30	30	17
	1080	22	30	9	30	30	28	24	27	30	11	19	30	30	30	30	25	30	21	30	29	13	28	7	30	27	18	10	30	30	30	30	18
1	1081	23	30	8	30	30	28	24	27	30	12	19	30	30	30	30	25	30	20	30	29	14	28	7	29	27	19	10	30	30	30	30	19
	1082	24	30	7	30	30	28	24	27	30	13	19	30	30	30	30	25	30	19	30	29	15	28	7	28	27	20	10	30	30	30	30	20
	1083	25	30	6	30	30	28	24	27	30	14	19	30	30	30	30	25	30	18	29	30	16	28	7	27	27	21	10	30	30	30	29	21
	1084	26	30	5	30	30	28	24	26	30	15	19	30	30	30	30	25	30	17	28	30	17	28	7	26	27	22	10	30	30	30	28	22
	1085	27	30	4	30	30	28	24	25	30	16	19	30	30	30	30	25	30	16	27	30	18	28	7	25	27	22	10	29	30	30	27	23
	1086	27	30	3	30	30	28	24	24	30	17	18	30	30	30	30	25	30	15	26	30	19	28	7	24	27	22	10	28	30	30	26	24
	1087	26	30	2	30	30	28	24	23	30	18	18	30	30	30	30	24	30	14	25	30	20	28	7	23	27	21	10	27	30	30	25	25
	1088	25	30	1	30	30	28	24	22	30	19	18	30	30	30	30	24	30	14	24	30	21	28	7	22	27	20	10	26	30	30	25	26
	1089	24	30	0	30	30	29	24	21	30	20	18	30	30	30	30	24	30	14	23	30	22	29	6	21	27	19	10	25	30	30	25	27
	1090	23	30	0	30	30	30	24	20	30	21	18	30	30	30	30	24	30	14	22	30	23	29	5	20	27	19	10	24	30	30	25	28
	1091	22	30	0	30	30	30	24	19	29	22	19	30	30	30	30	24	30	14	21	30	24	29	5	19	28	19	10	23	30	30	25	29
	1092	21	30	0	30	30	30	24	18	29	23	20	30	30	30	30	25	30	14	20	30	25	29	5	18	29	19	10	22	30	30	25	30
	1093	20	30	0	30	30	30	24	17	29	24	21	30	30	30	30	26	30	14	19	30	26	29	5	17	30	19	10	21	30	30	25	30
	1094	19	30	0	30	30	30	24	17	29	25	22	30	30	30	30	27	30	14	18	30	27	29	5	16	30	19	11	20	30	30	25	30
	1095	18	30	0	30	30	30	24	17	29	26	23	30	30	30	30	28	30	14	17	30	28	29	5	15	30	19	12	19	30	30	25	29
	1096	17	30	0	30	30	30	24	17	29	27	24	30	30	30	30	29	30	14	17	30	29	29	6	14	30	19	13	18	30	30	25	28
	1097	17	30	0	30	30	30	24	17	29	28	25	30	30	30	30	29	30	14	17	30	30	29	7	13	30	19	14	17	30	30	25	27
	1098	17	30	0	30	30	30	24	17	29	29	26	30	30	30	30	29	30	14	17	30	30	29	8	13	30	18	14	16	30	30	25	26
	1099	17	30	0	30	30	30	24	17	29	30	26	30	30	29	30	29	30	14	17	30	30	29	9	13	30	18	13	15	30	30	25	25
	1100	16	30	0	30	30	30	24	17	29	30	26	30	30	28	30	29	30	14	17	30	30	29	9	13	30	18	12	14	30	30	25	24
	1101	15	30	0	30	30	30	25	17	29	30	27	30	30	27	30	29	30	14	17	30	30	29	9	13	30	19	11	13	30	30	25	23
	1102	14	29	0	30	30	30	26	17	29	30	27	30	30	26	30	29	30	15	17	30	30	29	9	13	30	20	11	13	30	30	25	22
	1103	13	28	0	30	30	30	27	18	29	30	27	30	30	25	30	29	30	16	17	30	30	29	9	13	30	21	11	13	30	30	25	21
	1104	12	27	0	30	30	30	28	19	29	30	27	30	30	25	30	29	30	17	17	30	30	29	9	13	30	22	11	13	30	30	25	20
	1105	11	26	0	30	30	30	29	20	29	30	27	30	30	25	30	29	30	18	17	30	30	29	10	13	29	22	11	13	30	30	25	19
	1106	10	25	0	30	30	30	30	20	29	30	27	30	30	25	30	29	30	19	17	30	30	29	11	13	28	22	11	13	30	30	25	18
	1107	9	24	0	30	30	30	30	20	29	30	27	30	30	25	30	29	30	20	17	30	30	29	12	13	27	21	10	13	30	30	25	17
	1108	8	23	0	30	30	29	30	20	29	30	27	30	30	25	30	29	30	21	17	30	30	29	13	13	27	20	10	13	30	30	25	16
	1109	7	22	0	30	30	28	30	20	29	30	26	30	30	25	30	29	30	22	17	30	30	29	14	13	27	19	10	13	30	30	25	15
	1110	6	21	0	30	30	27	30	20	29	30	25	30	30	25	30	29	30	23	17	30	30	29	15	13	27	19	10	13	30	30	25	14
1	1111	5	20	0	30	30	26	30	20	29	30	24	30	30	25	30	29	30	24	17	30	30	29	16	14	27	19	10	13	30	30	25	13
	1112	4	19	0	30	30	25	30	20	29	30	23	30	30	25	30	29	30	25	17	30	30	29	17	15	27	19	10	13	30	30	25	12
	1113	3	18	0	30	30	24	30	20	29	30	22	30	30	25	30	29	30	26	18	30	30	29	18	16	27	19	10	13	30	30	26	11
	1114	2	18	0	30	30	23	30	21	29	30	21	30	30	25	29	28	30	27	19	30	30	29	19	17	27	19	10	13	30	30	27	10
	1115	1	18	0	30	30	22	30	22	29	30	20	30	30	24	29	27	30	28	20	30	30	29	20	18	27	20	10	14	30	30	28	9
	1116	0	18	0	30	30	21	30	23	29	30	20	30	30	23	29	26	30	29	21	30	30	29	21	19	27	21	10	15	30	30	29	8
	1117	0	18	0	30	30	20	30	24	29	30	19	30	30	23	29	27	30	30	22	30	30	29	22	20	27	22	10	16	30	30	30	7
	1118	0	18	0	30	30	20	30	25	29	30	19	30	30	23	29	27	30	30	23	30	30	30	23	21	27	23	10	17	30	30	30	6
	1119	0	18	0	30	30	20	30	26	29	30	19	30	30	23	29	27	30	30	24	30	30	30	24	22	26	24	10	18	30	30	30	6
	1120	0	18	1	30	30	20	30	27	29	30	19	30	30	23	29	27	30	30	25	30	30	30	25	23	25	24	10	19	30	30	30	6
	1121	0	18	2	30	29	20	30	28	30	30	19	30	30	23	29	27	30	30	26	30	30	30	25	24	25	24	10	20	30	30	30	6
	1122	0	18	3	30	28	20	30	29	29	30	19	30	30	23	29	27	30	30	26	30	30	30	25	25	25	24	10	21	30	30	30	6
	1123	0	18	4	30	27	20	30	30	28	30	18	30	30	23	29	27	30	30	26	30	30	30	25	26	25	24	11	22	30	30	30	6
	1124	0	18	5	30	26	20	30	30	27	30	17	30	30	23	29	27	30	30	26	30	30	30	25	27	25	24	11	23	30	30	30	6
	1125	0	18	6	30	25	20	30	30	26	30	16	30	30	23	29	27	30	30	26	30	30	30	25	28	25	24	11	24	30	30	30	7
	1126	0	18	7	30	24	20	30	30	25	30	15	30	30	22	29	27	30	30	25	30	30	30	25	29	25	24	11	25	30	30	30	8
	1127	1	18	8	30	23	20	30	30	24	30	14	30	30	21	29	27	30	30	25	30	30	30	25	30	25	24	11	26	30	30	30	9
	1128	2	18	9	30	23	20	30	30	24	30	13	30	30	20	29	27	30	30	25	30	30	30	25	30	25	25	11	27	30	30	30	10
	1129	3	18	10	30	23	20	30	30	24	30	13	30	30	20	29	27	30	30	25	30	30	30	25	29	25	25	12	28	30	30	30	11
	1130	4	18	11	30	23	20	30	30	24	30	13	30	30	21	29	27	30	30	25	30	30	30	26	28	25	25	13	29	30	30	30	12
	1131	5	18	12	30	23	20	30	30	24	30	12	30	30	22	29	27	30	30	25	30	30	30	27	27	25	25	14	30	30	30	30	13
	1132	6	19	13	30	23	20	30	30	24	30	11	30	30	23	29	27	30	30	24	30	30	30	28	26	25	25	14	30	30	30	30	14
	1133	7	20	14	30	23	20	30	30	24	30	10	30	30	24	29	27	30	30	23	30	30	30	29	25	25	25	14	30	30	30	30	15
	1134	8	21	15	30	23	20	30	30	24	30	9	30	30	24	29	27	30	30	22	30	30	30	30	24	25	25	14	30	30	30	30	16
	1135	9	22	16	30	23	20	30	30	24	30	8	30	30	24	29	27	30	30	21	30	30	30	30	23	26	26	14	30	30	30	30	17
	1136	10	23	17	30	23	20	30	30	24	30	7	30	30	24	29	27	30	30	20	30	30	30	30	22	27	27	14	30	30	30	30	18
	1137	11	24	17	30	23	20	30	30	24	30	6	30	30	24	29	27	30	30	19	30	30	30	30	21	27	28	15	30	30	29	30	19
	1138	12	25	17	30	23	21	30	30	24	30	5	30	30	24	29	27	30	30	18	30	30	30	30	20	26	29	15	30	30	28	30	20
	1139	13	26	17	30	23	22	30	30	24	30	5	30	30	24	29	27	30	30	17	30	30	30	29	19	25	30	15	30	30	27	30	21
	1140	14	27	17	30	23	23	30	30	24	30	5	30	30	24	29	27	30	30	16	30	30	30	29	18	24	30	15	30	30	26	30	22
1	1141	15	28	17	30	23	24	30	30	24	30	5	30	30	24	29	27	30	30	16	30	30	30	29	18	23	30	15	30	30	25	30	23
	1142	16	29	17	30	23	25	29	30	24	30	5	30	30	24	29	27	30	30	16	30	30	30	29	18	22	30	15	30	30	24	30	24
	1143	17	30	17	30	23	26	28	30	24	30	5	30	30	24	29	27	30	30	16	30	30	30	29	18	21	30	15	30	30	23	30	25
	1144	18	30	17	30	23	27	27	30	24	30	5	30	30	24	30	28	30	30	16	30	30	30	29	18	20	30	15	30	30	22	30	26
	1145	19	30	17	30	23	28	26	30	24	30	6	30	30	25	30	28	30	30	16	30	30	30	29	18	19	30	15	29	30	22	30	27
	1146	20	30	17	30	23	29	25	30	24	30	7	30	30	26	30	28	30	30	16	30	30	30	29	18	18	30	15	29	30	22	30	28
	1147	21	30	17	30	23	30	24	30	24	30	8	30	30	26	30	27	30	30	16	30	30	30	29	18	18	30	15	29	30	22	30	29
	1148	22	30	17	30	23	30	23	30	24	30	8	30	30	26	30	26	30	30	16	30	30	30	29	18	18	30	15	29	30	22	30	30
	1149	23	30	17	30	23	30	22	30	24	30	8	30	30	26	30	25	30	30	16	30	30	30	29	18	19	30	15	29	30	22	30	30
	1150	24	30	16	30	22	30	21	30	24	30	8	30	30	26	30	24	30	30	16	30	30	30	29	18	20	30	15	29	30	22	30	30
	1151	25	30	15	30	23	30	20	30	24	30	8	30	30	26	30	23	30	30	16	30	30	30	29	18	20	29	15	29	30	22	30	30
	1152	26	30	14	30	24	30	19	30	25	30	8	30	30	26	30	22	30	30	17	30	30	30	29	18	20	28	15	29	30	22	30	30
	1153	27	30	13	30	25	30	18	30	26	30	9	30	30	26	30	21	30	30	18	30	30	30	29	18	20	27	14	29	30	22	30	30
	1154	28	30	12	30	26	30	17	30	27	30	10	30	30	26	30	20	30	30	18	30	30	30	29	18	19	26	13	29	30	22	30	30
	1155	29	30	11	30	27	30	16	30	28	30	11	30	30	25	30	19	30	30	18	30	30	30	29	18	18	26	12	29	30	22	30	30
	1156	30	30	10	30	28	30	15	30	29	30	12	30	30	26	30	18	30	30	18	30	30	30	29	18	17	26	11	29	30	22	30	30
	1157	30	30	9	30	29	30	15	30	30	30	13	30	30	27	30	17	30	30	17	30	30	30	29	18	16	26	10	29	30	22	30	30
	1158	30	30	8	30	29	30	15	30	30	30	14	30	30	28	30	16	30	30	16	30	30	30	29	18	15	26	9	29	30	22	30	30
	1159	30	30	7	30	29	30	15	30	30	30	15	30	30	29	30	15	30	30	15	30	30	30	29	19	15	26	8	29	30	22	30	30
	1160	30	30	6	30	29	30	15	30	30	30	16	30	30	29	30	14	30	30	15	30	30	30	29	20	15	25	7	29	30	22	30	30
	1161	30	30	6	30	29	30	15	30	30	30	17	30	30	29	30	13	30	30	15	30	30	30	29	21	15	25	6	29	30	22	30	30
	1162	30	30	6	30	29	30	15	30	30	30	17	30	30	29	30	12	30	30	16	30	30	29	29	22	15	25	5	29	30	22	30	30
	1163	30	30	6	30	29	30	15	30	30	30	17	30	30	29	30	11	30	30	17	30	30	28	29	22	15	25	4	29	30	22	30	30
	1164	30	30	6	30	29	30	15	30	30	30	17	30	30	29	30	10	30	30	18	30	30	27	29	22	15	25	3	29	30	22	30	30
	1165	30	30	6	30	29	30	15	30	30	30	17	30	30	29	30	9	30	30	19	30	30	26	29	22	15	25	2	29	30	22	30	30
	1166	30	30	6	30	29	30	15	30	30	30	18	30	30	29	30	8	30	30	19	30	30	25	29	22	15	24	1	29	30	22	30	30
	1167	30	30	7	30	29	30	15	30	29	30	19	30	30	29	30	7	30	30	19	30	30	24	29	22	15	23	0	29	30	23	30	30
	1168	30	30	8	30	29	30	15	30	28	30	20	30	30	29	30	6	30	30	19	29	30	24	29	22	15	22	0	29	30	24	30	30
	1169	30	30	9	30	29	30	15	30	28	30	21	30	30	29	30	5	30	30	19	28	30	24	30	22	15	21	1	29	30	25	30	30
	1170	30	30	10	30	29	30	15	30	28	30	22	30	30	29	30	4	30	30	19	27	30	24	30	22	15	20	2	29	30	26	30	30
1	1171	30	30	11	30	29	30	15	30	28	30	23	30	30	29	30	3	30	30	18	26	30	24	30	21	15	19	3	28	30	27	30	30
	1172	30	30	12	30	29	30	16	30	28	30	24	30	30	29	29	2	30	30	17	25	30	24	30	20	15	18	4	27	30	28	29	30
	1173	30	30	13	30	29	30	17	30	28	30	25	30	30	29	28	1	30	30	16	24	30	24	30	19	15	17	5	26	30	29	28	30
	1174	30	30	14	30	29	30	18	30	27	30	26	30	30	29	27	0	30	30	15	23	30	24	30	18	15	16	6	25	30	30	27	30
	1175	30	30	15	30	29	30	19	30	26	30	26	30	30	29	26	0	30	30	15	22	30	24	30	17	15	15	7	25	30	30	26	30
	1176	30	30	16	30	29	30	20	30	25	30	26	30	30	29	25	1	30	30	15	21	30	24	30	16	15	15	8	24	30	30	25	30
	1177	30	30	17	30	29	30	21	30	24	30	26	30	30	29	24	2	30	30	15	20	30	24	30	16	15	15	8	23	30	30	25	30
	1178	30	30	18	30	29	30	22	30	23	30	26	30	30	29	23	3	30	30	15	19	30	24	30	16	15	15	8	22	30	30	25	30
	1179	30	30	19	30	29	30	23	30	22	30	26	30	30	29	22	4	30	30	15	18	30	24	30	16	15	15	8	21	30	30	25	30
	1180	30	30	20	30	30	30	24	30	21	30	26	30	30	29	21	5	30	30	15	17	30	24	30	16	15	15	8	20	30	30	25	30
	1181	30	30	21	30	30	30	25	30	20	30	26	30	30	29	20	6	30	30	15	16	30	24	30	16	15	15	8	20	30	30	25	30
	1182	30	30	22	30	30	30	26	30	19	30	26	30	30	29	19	7	30	30	15	15	30	24	30	16	15	16	8	20	30	30	25	30
	1183	30	30	23	30	30	30	27	30	18	30	26	30	30	29	18	8	30	30	15	14	30	24	30	16	14	17	8	20	30	30	25	30
	1184	30	30	24	30	30	30	28	30	17	30	26	30	30	29	17	9	30	30	16	13	30	24	30	16	15	18	8	20	30	30	25	30
	1185	30	30	25	30	30	30	29	30	16	30	26	30	30	30	16	10	30	30	17	12	30	24	30	16	16	18	8	20	30	30	25	30
	1186	29	30	26	30	30	30	29	30	15	30	26	30	30	30	15	11	30	30	18	11	30	24	30	16	17	18	8	20	30	30	25	30
	1187	28	30	27	30	30	30	29	30	14	30	26	30	30	30	14	12	30	30	19	10	30	24	30	16	18	18	8	20	30	30	25	30
	1188	27	30	28	30	30	30	29	30	13	30	26	30	30	30	13	13	30	30	20	9	30	24	29	16	19	18	8	20	30	30	25	30
	1189	26	30	29	30	29	30	29	30	12	30	26	30	30	30	12	14	30	30	21	8	30	24	28	16	19	18	8	20	30	29	25	30
	1190	25	30	30	30	29	30	29	30	11	30	26	30	30	30	11	15	30	30	21	8	30	24	27	16	19	19	8	20	30	28	24	30
	1191	24	30	30	30	29	30	29	30	10	30	26	30	30	30	11	16	30	30	21	8	30	24	26	16	19	19	8	20	30	27	23	30
	1192	23	30	30	30	29	30	29	30	9	30	27	30	30	30	11	17	30	30	21	8	30	25	25	16	19	18	9	20	30	26	23	30
	1193	22	30	30	30	29	30	29	30	8	30	28	30	30	30	11	18	30	30	21	8	30	26	24	17	19	17	10	20	30	25	23	30
	1194	21	30	30	30	29	30	29	30	7	30	29	30	30	30	11	19	30	30	21	8	30	27	23	18	19	16	11	20	30	24	23	30
	1195	20	30	30	30	29	30	29	30	7	30	30	30	30	30	11	20	30	30	21	8	30	28	22	19	19	15	12	20	30	24	23	30
	1196	20	30	30	30	29	30	29	30	7	30	30	30	30	30	11	21	30	30	22	8	30	29	21	20	19	15	13	20	30	24	23	30
	1197	20	30	30	30	29	30	28	30	8	30	30	30	30	30	11	22	30	30	23	8	30	30	20	21	20	15	14	20	30	24	23	30
	1198	20	30	29	30	29	30	28	30	9	30	30	30	30	30	11	23	30	30	24	9	30	30	19	22	21	16	15	20	30	24	23	30
	1199	20	30	28	30	29	30	28	30	9	30	30	30	30	30	10	24	30	30	25	10	30	30	18	23	22	17	15	20	30	24	23	30
	1200	20	30	27	30	29	30	28	30	8	30	30	30	30	30	9	25	30	30	26	11	30	30	17	24	23	18	15	20	30	24	23	30
1	1201	20	30	26	30	29	30	28	30	7	30	30	30	30	30	8	26	30	30	27	12	30	29	16	24	24	19	15	21	30	24	23	30
	1202	19	30	25	30	29	30	28	30	6	30	30	30	30	30	8	27	30	30	28	13	30	28	15	24	25	20	15	22	30	24	24	30
	1203	18	30	24	30	29	30	28	30	5	30	30	30	30	30	8	28	30	30	29	13	30	27	14	24	26	21	15	22	30	24	25	30
	1204	17	30	23	30	29	30	28	30	5	30	30	30	30	30	8	29	30	30	30	13	30	26	13	24	27	22	15	22	30	24	26	30
	1205	16	30	22	30	29	30	28	30	5	30	30	30	30	30	8	30	29	30	30	13	30	26	12	24	28	23	15	22	30	24	27	30
	1206	15	30	21	30	29	30	28	30	5	30	30	30	30	30	8	30	29	30	30	13	30	26	11	24	29	23	14	22	30	24	28	30
	1207	14	30	20	30	29	30	28	30	5	30	30	30	30	30	8	30	29	30	30	13	30	26	10	23	29	23	14	22	30	24	28	30
	1208	13	30	19	30	29	30	28	30	5	30	30	30	30	30	8	30	29	30	30	13	30	26	9	22	29	23	14	22	30	24	28	30
	1209	12	30	18	30	29	30	28	30	6	30	30	30	30	30	8	30	29	30	30	13	30	26	8	21	29	23	14	22	30	24	28	30
	1210	11	30	17	30	29	30	28	30	7	30	30	30	30	30	8	30	29	30	30	13	30	26	7	20	29	23	15	22	30	24	27	30
	1211	10	30	16	29	29	30	28	30	8	30	30	30	30	30	8	30	29	30	30	13	30	26	6	19	29	23	16	21	30	24	26	30
	1212	9	29	15	28	29	30	28	30	9	30	30	30	30	30	8	30	29	30	30	13	30	26	5	18	29	22	17	20	30	24	25	30
	1213	8	28	14	27	29	30	28	30	10	30	30	30	30	30	8	30	29	30	30	14	30	26	4	17	30	21	18	19	30	24	24	30
	1214	8	27	13	26	29	30	28	30	10	30	30	30	30	30	8	30	29	30	30	15	30	26	3	17	30	20	19	18	30	24	23	30
	1215	8	26	12	25	29	30	27	30	10	30	30	30	30	30	8	30	29	30	30	16	30	26	3	17	30	19	20	17	30	24	22	30
	1216	9	25	11	24	29	30	27	30	10	30	30	30	30	30	8	30	29	30	30	17	30	25	3	17	30	18	21	16	30	24	22	30
	1217	10	24	10	23	29	30	26	30	10	30	30	30	30	30	8	30	29	30	29	18	30	25	3	17	30	17	22	15	30	24	22	30
	1218	11	23	9	22	29	30	25	30	10	30	30	30	30	29	8	30	29	30	28	19	30	25	4	17	30	16	23	14	30	24	22	30
	1219	12	22	8	21	30	30	24	30	10	30	30	30	30	29	8	30	29	30	27	20	30	25	5	17	30	15	24	13	30	25	22	29
	1220	13	21	7	20	30	30	24	30	10	30	30	30	30	29	8	30	29	30	26	20	30	25	6	17	30	14	25	12	30	26	23	28
	1221	14	20	6	19	30	30	24	30	11	30	30	30	30	29	7	30	29	30	25	20	30	25	7	17	30	14	26	11	30	27	24	27
	1222	15	19	6	18	30	30	24	30	12	30	30	30	30	29	6	30	29	30	24	20	30	25	8	16	30	15	26	10	30	28	24	26
	1223	16	18	6	17	30	30	24	30	13	30	30	30	30	29	5	30	29	30	24	20	30	25	9	16	30	16	26	9	30	29	24	25
	1224	17	17	6	16	30	30	24	30	14	30	30	30	30	29	4	30	29	29	24	20	30	25	10	16	30	17	26	9	30	30	24	24
	1225	18	16	6	15	30	30	24	30	14	30	30	30	30	29	3	30	29	29	24	20	30	25	11	16	29	18	26	9	30	30	24	23
	1226	18	15	6	15	30	30	24	30	14	30	30	30	30	29	2	30	29	29	24	20	30	25	12	16	28	19	26	9	30	30	24	22
	1227	18	14	6	15	30	30	25	30	14	30	30	30	30	29	1	30	29	29	24	20	30	25	13	16	27	20	26	9	30	30	24	22
	1228	18	13	7	15	30	30	25	30	14	30	30	30	30	29	0	30	29	29	24	20	30	25	14	16	26	19	26	9	30	30	24	22
	1229	18	12	8	15	30	30	25	30	14	30	30	30	30	29	1	30	29	29	24	20	30	25	15	16	25	18	26	8	30	30	24	22
	1230	18	11	9	15	30	30	25	30	15	30	30	30	30	29	2	30	29	29	24	20	30	25	16	16	24	17	26	7	30	30	24	22
1	1231	18	10	10	14	30	30	25	30	16	30	30	30	30	29	3	30	29	29	24	20	30	26	17	17	23	16	26	7	30	30	24	22
	1232	19	9	11	14	30	30	25	30	17	30	30	30	30	29	4	30	29	29	23	20	30	27	18	18	23	16	26	7	30	30	24	22
	1233	20	8	12	14	30	30	25	30	18	30	29	30	30	29	5	30	28	29	22	21	30	28	19	19	23	16	26	8	30	30	24	22
	1234	21	7	13	14	30	30	25	30	19	30	28	30	30	28	6	30	27	29	21	22	30	29	20	20	23	16	26	9	30	30	24	22
	1235	22	6	14	14	30	30	25	30	20	30	27	30	30	27	6	30	27	29	20	23	30	29	21	21	23	16	25	10	30	30	24	22
	1236	23	5	15	14	30	30	25	30	21	30	26	30	30	26	6	30	26	29	19	24	30	29	22	22	23	16	25	11	30	30	24	22
	1237	24	4	16	14	30	30	24	30	22	30	25	30	30	25	6	30	25	29	18	25	30	29	23	23	22	16	25	12	30	30	24	22
	1238	25	3	17	14	30	30	24	30	23	30	24	30	30	25	6	30	24	29	17	26	30	29	24	24	22	16	25	13	30	30	24	22
	1239	26	2	18	14	30	30	24	30	23	30	24	30	30	25	6	30	23	29	16	27	30	29	25	25	22	16	25	14	30	30	24	22
	1240	27	1	19	14	30	30	24	30	23	30	24	30	30	25	6	30	22	29	15	28	30	29	26	26	22	16	24	15	30	30	25	22
	1241	28	0	20	15	30	30	24	30	23	30	24	30	30	25	6	30	21	29	14	29	30	29	27	27	22	17	23	16	30	30	26	22
	1242	29	1	21	16	30	30	24	30	23	30	24	30	30	25	6	30	20	29	13	30	30	29	28	28	22	18	23	17	30	30	27	22
	1243	30	2	22	17	30	30	23	30	23	30	24	30	30	25	6	30	19	29	12	30	30	29	29	29	22	19	23	18	30	30	28	21
	1244	30	3	23	18	30	30	23	30	24	30	23	30	30	25	6	30	18	29	11	30	30	29	30	28	22	20	23	19	30	30	29	21
	1245	30	4	24	19	30	30	24	30	25	30	22	30	30	25	6	30	17	29	10	29	30	29	30	27	22	21	23	20	30	30	30	21
	1246	30	5	25	20	30	30	25	30	26	30	21	30	30	25	6	30	16	29	10	28	30	30	30	26	22	22	23	21	30	30	30	21
	1247	30	6	26	21	30	30	26	30	27	30	20	30	30	25	6	30	16	29	11	27	30	30	30	25	22	23	23	22	30	30	30	21
	1248	30	7	27	22	30	30	27	30	28	30	19	30	30	26	6	30	16	29	12	26	30	30	30	24	22	24	23	23	30	30	30	21
	1249	30	8	28	23	30	30	28	30	29	30	18	30	30	25	6	30	16	28	13	25	30	30	30	23	22	25	23	24	30	30	30	22
	1250	30	9	29	24	30	30	27	30	30	30	17	30	30	25	6	30	16	28	14	25	30	30	30	22	22	26	23	25	29	30	29	22
	1251	30	10	30	25	30	30	27	30	30	30	16	30	30	25	6	30	16	28	15	25	30	30	30	21	21	26	23	26	28	30	29	22
	1252	29	11	30	26	30	30	27	30	30	30	15	30	30	25	6	30	16	28	16	25	30	30	30	21	20	26	23	27	27	30	29	22
	1253	28	12	30	27	30	30	27	30	30	30	14	30	30	25	6	30	16	28	15	25	30	30	30	20	19	26	23	28	26	30	29	22
	1254	27	13	30	28	30	30	27	30	30	30	13	30	30	25	6	30	16	29	14	25	30	30	30	19	18	26	23	28	25	30	29	22
	1255	26	14	30	29	30	30	27	30	30	30	12	30	30	25	6	30	16	29	14	25	30	30	30	18	18	26	23	28	24	30	29	22
	1256	25	15	30	29	30	30	27	30	30	30	12	30	30	25	6	30	16	29	14	25	30	30	30	17	18	26	23	28	23	29	29	22
	1257	25	16	30	29	30	30	27	30	30	30	12	30	30	25	6	30	15	29	14	25	30	30	30	17	18	26	23	28	22	28	29	22
	1258	25	17	30	29	30	30	27	30	30	30	12	30	30	25	6	30	14	29	14	25	30	30	30	17	18	27	23	28	21	28	29	22
	1259	25	18	30	29	30	30	27	30	30	30	12	30	30	25	5	30	13	29	14	25	30	30	30	17	18	28	23	29	20	28	29	22
	1260	25	19	30	29	30	30	26	30	30	30	12	30	30	25	4	30	12	29	14	25	30	30	30	17	18	29	23	30	19	28	29	22
1	1261	25	20	30	30	30	30	26	30	30	30	11	30	30	25	3	30	11	29	14	25	30	30	30	17	18	30	23	30	18	28	29	22
	1262	25	21	30	30	30	30	26	30	30	30	10	30	30	24	2	30	10	29	14	25	30	30	30	17	18	30	23	30	17	28	29	21
	1263	25	22	30	30	30	30	26	30	30	30	10	30	30	23	1	30	10	29	15	25	30	30	30	17	18	30	23	30	16	28	29	21
	1264	25	23	30	30	30	30	26	30	30	30	11	30	30	23	0	30	10	29	16	25	30	30	30	17	18	30	23	30	15	28	29	21
	1265	25	24	30	30	30	30	26	30	30	30	12	30	30	23	0	30	10	29	17	25	30	30	30	17	18	30	24	30	14	28	29	21
	1266	25	25	30	30	30	30	26	30	30	30	13	30	30	24	1	30	10	29	18	25	30	30	30	17	18	30	25	30	13	28	29	21
	1267	25	26	30	30	30	30	27	30	30	30	14	30	30	25	2	30	10	29	19	25	30	30	30	17	19	30	26	30	12	28	29	21
	1268	25	27	30	30	30	30	27	30	30	30	15	30	30	25	3	30	10	29	20	25	30	29	30	17	19	30	27	30	11	28	29	20
	1269	25	28	30	30	30	30	27	30	30	30	15	30	30	25	4	30	10	29	21	25	30	29	30	17	19	29	28	30	10	28	29	19
	1270	25	29	30	30	30	30	27	30	30	30	14	30	30	25	5	30	10	29	22	25	30	29	30	17	19	29	29	30	9	28	29	18
	1271	25	30	30	30	30	30	26	30	30	30	14	30	30	25	6	30	10	29	23	25	30	29	30	17	19	29	30	30	8	28	29	17
	1272	25	30	30	30	30	30	25	30	30	30	14	30	30	24	7	30	10	29	24	25	30	29	30	17	18	29	30	30	7	28	29	16
	1273	25	30	30	30	30	30	25	30	30	30	14	30	30	23	8	30	10	29	25	25	30	29	30	17	17	29	30	30	6	28	29	16
	1274	25	30	30	30	30	30	24	30	30	30	15	30	30	22	9	30	10	29	26	25	30	29	30	18	16	29	30	30	5	28	29	15
	1275	25	30	30	30	30	30	23	30	30	30	16	30	30	21	10	30	10	29	27	26	30	29	30	19	15	29	30	30	4	28	29	14
	1276	25	30	30	30	30	30	23	30	29	30	17	30	30	21	11	30	10	29	27	27	30	29	30	20	14	29	30	30	3	28	29	13
	1277	25	30	30	30	30	30	23	30	28	30	18	30	30	21	12	30	9	29	27	28	30	29	30	21	13	29	30	30	2	28	29	12
	1278	25	30	30	30	30	30	23	30	27	30	19	30	30	21	13	30	8	29	27	29	30	28	30	22	12	29	30	30	1	28	29	11
[truncated: 162 more rows]

## Sheet: beam breaks per 30 mins
30mints	time	ch1	ch2	ch3	ch4	ch5	ch6	ch7	ch8	ch9	ch10	ch11	ch12	ch13	ch14	ch15	ch16	ch17	ch18	ch19	ch20	ch21	ch22	ch23	ch24	ch25	ch26	ch27	ch28	ch29	ch30	ch31	ch32
[truncated: 1,440 more rows]
